# Supplementary material
Source: publisher figshare collection journal article supplement (https://frontiersin.figshare.com/ndownloader/files/25850456)
Supplement: Supplementary file 1 [file 25850456]

ch bled sex

"0010000000" "Yes" "M"

"1000000000" "Yes" "M"

"0001000000" "Yes" "M"

"1000000000" "Yes" "M"

"1000000000" "Yes" "M"

"0010000000" "Yes" "M"

"1000000000" "Yes" "M"

"0000001000" "Yes" "M"

"0001000000" "Yes" "M"

"1000000000" "Yes" "M"

"1000000000" "Yes" "M"

"1000000000" "Yes" "M"

"0001000000" "Yes" "M"

"0000000100" "Yes" "M"

"1000000000" "Yes" "M"

"0100000000" "Yes" "M"

"0100000000" "Yes" "M"

"1000000000" "Yes" "M"

"0010000000" "Yes" "M"

"0001000000" "Yes" "F"

"0001000000" "Yes" "M"

"0001000000" "Yes" "M"

"0010000000" "Yes" "F"

"0010000000" "Yes" "M"

"0010000000" "Yes" "M"

"0001000000" "Yes" "F"

"1000000000" "Yes" "M"

"0001000000" "Yes" "M"

"1000000000" "Yes" "M"

"0010000000" "Yes" "M"

"0010000000" "Yes" "F"

"1100000000" "Yes" "M"

"0100000000" "No" "M"

"0000010000" "No" "M"

"0100000000" "No" "M"

"0010000000" "No" "M"

"1000000000" "No" "M"

"0000010000" "Yes" "M"

"0001000000" "Yes" "M"

"1000000000" "Yes" "M"

"1000000000" "Yes" "M"

"1000000000" "Yes" "M"

"0010000000" "Yes" "M"

"0001000000" "No" "M"

"0100000000" "Yes" "M"

"0000000010" "Yes" "F"

"1000000000" "Yes" "M"

"0100000000" "Yes" "M"

"1000000000" "Yes" "M"

"1000000000" "Yes" "M"

"1000000000" "Yes" "M"

"0010000000" "Yes" "M"

"1000000000" "Yes" "M"

"0001000000" "Yes" "F"

"0100000000" "Yes" "F"

"1000000000" "Yes" "M"

"0000000010" "Yes" "M"

"0000000100" "Yes" "M"

"1000000000" "Yes" "F"

"0001000000" "Yes" "F"

"0000100000" "Yes" "F"

"0001000000" "Yes" "M"

"1000000000" "Yes" "M"

"0000000010" "Yes" "M"

"0000100000" "Yes" "M"

"0000100000" "Yes" "F"

"0010000000" "Yes" "F"

"1000000000" "Yes" "M"

"0111000000" "Yes" "M"

"0000100000" "Yes" "M"

"0000000010" "Yes" "M"

"0010000000" "Yes" "M"

"1000000000" "Yes" "M"

"0010000000" "Yes" "M"

"0000001000" "Yes" "M"

"1000000000" "Yes" "F"

"0000000001" "Yes" "F"

"0011000000" "Yes" "M"

"1000000000" "Yes" "M"

"0100000000" "Yes" "M"

"1000000000" "Yes" "M"

"1000000000" "Yes" "M"

"0100000000" "Yes" "M"

"0000010000" "Yes" "F"

"0010000000" "Yes" "M"

"0000000010" "Yes" "M"

"1000000000" "Yes" "M"

"1010000000" "Yes" "M"

"1000000000" "Yes" "M"

"0010000000" "Yes" "M"

"0000000100" "Yes" "M"

"0000000100" "Yes" "F"

"0001000000" "Yes" "M"

"1000000000" "Yes" "M"

"0000001000" "Yes" "M"

"1000000000" "Yes" "M"

"0001000000" "Yes" "M"

"0000000100" "Yes" "M"

"0000001000" "Yes" "F"

"0100000000" "Yes" "F"

"1000000000" "Yes" "M"

"1000000000" "Yes" "F"

"0000000100" "Yes" "F"

"0100000000" "Yes" "F"

"0010000000" "Yes" "M"

"1000000000" "Yes" "M"

"0000001000" "Yes" "F"

"0000100000" "Yes" "M"

"0010000000" "Yes" "M"

"1000000000" "Yes" "M"

"0000001000" "Yes" "F"

"0010000000" "Yes" "M"

"1000000000" "Yes" "F"

"0010000000" "Yes" "M"

"0010000000" "Yes" "M"

"1000000000" "Yes" "M"

"1000000000" "Yes" "F"

"0000000100" "Yes" "F"

"0000001000" "Yes" "M"

"0000100000" "Yes" "F"

"0000100000" "Yes" "M"

"0100000000" "Yes" "M"

"0010000000" "No" "M"

"1000000000" "No" "F"

"1000000000" "No" "M"

"1000000000" "No" "M"

"1000000000" "No" "M"

"0000100000" "No" "M"

"0000000100" "No" "F"

"0010000000" "No" "M"

"0000010000" "No" "F"

"0100000000" "No" "M"

"0000100000" "No" "M"

"0000000100" "No" "F"

"0100000000" "No" "F"

"0000100000" "No" "M"

"1000000000" "No" "M"

"0110000000" "No" "M"

"0001000000" "No" "F"

"0001000000" "No" "M"

"0001000000" "No" "F"

"1000000000" "No" "M"

"0010000000" "No" "M"

"0000001000" "No" "F"

"0001000000" "No" "M"

"0000100000" "No" "M"

"0000100000" "No" "F"

"0000100000" "No" "M"

"0000100000" "No" "M"

"0000100000" "No" "M"

"0000100000" "No" "M"

"0000100000" "No" "F"

"0000100000" "No" "M"

"0000100000" "No" "F"

"0000100000" "No" "M"

"0000100000" "No" "M"

"0000100000" "No" "F"

"0000100000" "No" "M"

"0000100000" "No" "M"

"0000100000" "No" "M"

"0000100000" "No" "F"

"0000100000" "No" "M"

"0000100000" "No" "M"

"0000100000" "No" "M"

"0000100000" "No" "F"

"0000100000" "No" "M"

"0000100000" "No" "F"

"0000100000" "No" "M"

"0000100000" "No" "M"

"0000100000" "No" "F"

"0000100000" "No" "M"

"0000100000" "No" "M"

"0000100000" "No" "M"

"0000100000" "No" "M"

"0000100000" "No" "M"

"0000100000" "No" "F"

"0000100000" "No" "M"

"0000100000" "No" "F"

"0000100000" "No" "M"

"0000100000" "No" "F"

"0000100000" "No" "M"

"0000100000" "No" "M"

"0000100000" "No" "M"

"0000100000" "No" "M"

"0000100000" "No" "F"

"0000100000" "No" "M"

"0000110000" "No" "M"

"0000100000" "No" "F"

"0000100000" "No" "M"

"0000100000" "No" "M"

"0000100000" "No" "F"

"0000100000" "No" "F"

"0000100000" "No" "M"

"0000100000" "No" "M"

"0000100000" "No" "M"

"0000100000" "No" "M"

"0000100000" "No" "M"

"0000100000" "No" "M"

"0000100000" "No" "M"

"0000100000" "No" "F"

"0000100000" "No" "M"

"0000100000" "No" "M"

"0000100000" "No" "M"

"0000100000" "No" "M"

"0000100000" "No" "F"

"0000100000" "No" "M"

"0000100000" "No" "F"

"0000100000" "No" "M"

"0000100000" "No" "M"

"0000100000" "No" "F"

"0000100000" "No" "F"

"0000100000" "No" "M"

"0000100000" "No" "M"

"0000100000" "No" "M"

"0000100000" "No" "M"

"0000100000" "No" "M"

"0000100000" "No" "F"

"0000100000" "No" "M"

"0000100000" "No" "M"

"0000100000" "No" "M"

"0000100000" "No" "M"

"0000100000" "No" "M"

"0000100000" "No" "M"

"0000100000" "No" "M"

"0000100000" "No" "M"

"0000100000" "No" "M"

"0000100000" "No" "M"

"0000100000" "No" "F"

"0000100000" "No" "M"

"0000100000" "No" "M"

"0000100000" "No" "M"

"0000100000" "No" "M"

"0000100000" "No" "M"

"0000100000" "No" "M"

"0000100000" "No" "F"

"0000100000" "No" "M"

"0000100000" "No" "M"

"0000100000" "No" "M"

"0000100000" "No" "M"

"0000100000" "No" "M"

"0000100000" "No" "M"

"0000100000" "No" "M"

"0000100000" "No" "M"

"0000110000" "No" "M"

"0000100000" "No" "F"

"1000000000" "No" "M"

"0000000010" "No" "M"

"1000000000" "No" "F"

"1000000000" "No" "F"

"1000010000" "No" "F"

"1000000000" "No" "M"

"1000000000" "No" "M"

"1000000000" "No" "M"

"1000000000" "No" "M"

"1000000000" "No" "M"

"1000000000" "No" "M"

"1000000000" "No" "M"

"1000000000" "No" "M"

"1000000000" "No" "M"

"0001010000" "No" "M"

"0001000000" "No" "F"

"1000000000" "No" "M"

"1000000000" "No" "F"

"0001000000" "No" "M"

"0110000000" "No" "F"

"0000001000" "No" "M"

"0001000000" "Yes" "M"

"0100000000" "Yes" "F"

"0010000000" "Yes" "F"

"0000100000" "Yes" "M"

"1100000000" "Yes" "M"

"0000000010" "Yes" "M"

"0000000100" "Yes" "M"

"0010000000" "Yes" "M"

"0001000000" "Yes" "M"

"0100000000" "Yes" "F"

"1000000000" "Yes" "F"

"0000100000" "Yes" "F"

"0000000010" "Yes" "M"

"0100000000" "Yes" "M"

"0010000000" "Yes" "M"

"0001000000" "Yes" "M"

"1000000000" "Yes" "M"

"1000000000" "Yes" "M"

"1000000000" "Yes" "F"

"0000100000" "Yes" "M"

"0001000000" "Yes" "M"

"1000000000" "Yes" "M"

"1000000000" "Yes" "F"

"0100000000" "Yes" "F"

"0000100000" "Yes" "M"

"0100000000" "Yes" "M"

"0100000000" "Yes" "M"

"0010000000" "Yes" "M"

"0010000000" "Yes" "M"

"0000001000" "Yes" "F"

"0000010000" "Yes" "M"

"0001000000" "Yes" "M"

"1000000000" "Yes" "F"

"1000000000" "Yes" "F"

"0010000000" "Yes" "F"

"0010000000" "Yes" "F"

"0100000000" "Yes" "M"

"0000001000" "Yes" "F"

"1000000000" "Yes" "M"

"0001000000" "Yes" "M"

"0100000000" "Yes" "F"

"1001000000" "Yes" "M"

"0001000000" "Yes" "F"

"1000000000" "Yes" "M"

"0100000000" "Yes" "F"

"0001000000" "Yes" "M"

"1000000000" "Yes" "M"

"1000000000" "Yes" "F"

"0000100000" "Yes" "F"

"1000000000" "Yes" "F"

"1000000000" "Yes" "M"

"0000100000" "Yes" "F"

"1000000000" "Yes" "M"

"0001000000" "Yes" "M"

"0000100000" "Yes" "M"

"1000000000" "Yes" "M"

"0010000000" "Yes" "M"

"0000010000" "Yes" "M"

"0001000000" "Yes" "M"

"0001000000" "Yes" "M"

"0100000000" "Yes" "M"

"0001000000" "Yes" "M"

"1000000000" "Yes" "F"

"1000000000" "Yes" "M"

"0000010000" "Yes" "M"

"1000000000" "Yes" "M"

"0000010000" "Yes" "F"

"0100000000" "Yes" "M"

"0010000000" "Yes" "M"

"1100000000" "Yes" "M"

"0001000000" "Yes" "F"

"0100000000" "Yes" "M"

"1000000000" "Yes" "M"

"0001000000" "Yes" "M"

"1000000000" "Yes" "M"

"0000100000" "Yes" "M"

"0100000000" "Yes" "M"

"1000000000" "No" "M"

"1000000000" "No" "F"

"1000000000" "No" "M"

"1000000000" "No" "M"

"1000000000" "No" "F"

"1000000000" "No" "M"

"1000000000" "No" "F"

"1000000000" "No" "M"

"1000000000" "No" "M"

"1000000000" "No" "M"

"1000000000" "No" "F"

"1000000000" "No" "M"

"1000000000" "No" "F"

"1000010000" "No" "M"

"1000000000" "No" "F"

"1000000000" "No" "F"

"1000000000" "No" "M"

"1100000000" "No" "M"

"1000000000" "No" "M"

"1000000000" "No" "M"

"1000000000" "No" "M"

"1000000000" "No" "M"

"1000000000" "No" "M"

"1000000000" "No" "F"

"1000000000" "No" "M"

"1000000000" "No" "F"

"1000000000" "No" "M"

"1000000000" "No" "F"

"1000000000" "No" "F"

"1000000000" "No" "F"

"1000000000" "No" "F"

"1000000000" "No" "M"

"1000000000" "No" "M"

"1000000000" "No" "M"

"1000000000" "No" "M"

"1000000000" "No" "M"

"1000000000" "No" "F"

"1000000000" "No" "M"

"1000000000" "No" "M"

"1000000000" "No" "M"

"1000000000" "No" "M"

"1000000000" "No" "F"

"1000000000" "No" "F"

"1000000000" "No" "M"

"1000000000" "No" "M"

"1000000000" "No" "M"

"1000000000" "No" "M"

"1000000000" "No" "F"

"1000000000" "No" "M"

"1000000000" "No" "M"

"1000000000" "No" "F"

"1000000000" "No" "M"

"1000000000" "No" "M"

"1000000000" "No" "M"

"1000000000" "No" "M"

"1000000000" "No" "F"

"1000000000" "No" "F"

"1000000000" "No" "F"

"1000000010" "No" "M"

"1010001000" "No" "F"

"1000000000" "No" "M"

"1000000000" "No" "M"

"1000000000" "No" "F"

"1000000000" "No" "F"

"1000000000" "No" "M"

"1000000000" "No" "F"

"1000000000" "No" "F"

"1000000000" "No" "M"

"1000000000" "No" "M"

"1000000000" "No" "F"

"1000000000" "No" "M"

"1000000000" "No" "F"

"1000000000" "No" "M"

"1000000000" "No" "M"

"1000000000" "No" "M"

"1000000000" "No" "M"

"1000000000" "No" "M"

"1000000000" "No" "F"

"1000000000" "No" "F"

"1100000000" "No" "F"

"1000000000" "No" "M"

"1000000000" "No" "M"

"1000000000" "No" "F"

"1000000000" "No" "F"

"1000000000" "No" "F"

"1000000000" "No" "M"

"1000000000" "No" "M"

"1000000000" "No" "M"

"1000000000" "No" "F"

"1000000000" "No" "M"

"1100000000" "No" "M"

"1000000000" "No" "M"

"1000000000" "No" "F"

"1000000000" "No" "M"

"1100000000" "No" "M"

"1000000000" "No" "M"

"1000000000" "No" "F"

"1000000000" "No" "M"

"1000000000" "No" "M"

"1000000000" "No" "M"

"1000000000" "No" "F"

"1000000000" "No" "M"

"1000000000" "No" "M"

"1000000000" "No" "F"

"1000000000" "No" "M"

"1000000000" "No" "F"

"1000000000" "No" "F"

"1000000000" "No" "F"

"1000000000" "No" "M"

"1000000000" "No" "F"

"1000000000" "No" "M"

"1000000000" "No" "F"

"1000000000" "No" "F"

"1000000000" "No" "M"

"1000000000" "No" "M"

"1000000000" "No" "F"

"1000000000" "No" "M"

"1000000000" "No" "M"

"1000000000" "No" "F"

"1000000000" "No" "F"

"1000000000" "No" "F"

"1000000000" "No" "F"

"1000000000" "No" "M"

"1000000000" "No" "M"

"1000000000" "No" "M"

"1000000000" "No" "F"

"1000000000" "No" "F"

"1000000000" "No" "M"

"1000000000" "No" "F"

"1000000000" "No" "M"

"1000000000" "No" "M"

"1000000000" "No" "M"

"1000000000" "No" "M"

"1000000000" "No" "M"

"1000000000" "No" "M"

"1000000000" "No" "F"

"1000000000" "No" "F"

"1000001000" "No" "M"

"1000000000" "No" "M"

"1000000000" "No" "M"

"1100000000" "No" "M"

"1000000000" "No" "F"

"1000000000" "No" "F"

"1000000000" "No" "M"

"1000000000" "No" "F"

"1000000000" "No" "M"

"1000000000" "No" "M"

"1000000000" "No" "M"

"1000000000" "No" "M"

"1000000000" "No" "F"

"1000000000" "No" "M"

"1000000000" "No" "M"

"1000000000" "No" "F"

"1000000000" "No" "F"

"1000000000" "No" "M"

"1000000000" "No" "F"

"1000000000" "No" "F"

"1000000000" "No" "M"

"1000000000" "No" "M"

"1000000000" "No" "F"

"1000000000" "No" "F"

"1000000000" "No" "F"

"1000000000" "No" "F"

"1000000000" "No" "F"

"1000000000" "No" "F"

"1000000000" "No" "M"

"1000000000" "No" "M"

"1000000000" "No" "M"

"1000000000" "No" "F"

"1000000000" "No" "M"

"1000000000" "No" "F"

"1000000000" "No" "M"

"1000000000" "No" "F"

"1000000000" "No" "F"

"1000000000" "No" "M"

"1000000000" "No" "M"

"1000000000" "No" "M"

"1000000000" "No" "M"

"1100000000" "No" "M"

"1000000000" "No" "M"

"1000000000" "No" "M"

"1000000000" "No" "F"

"1000000000" "No" "M"

"1000000000" "No" "M"

"1000000000" "No" "M"

"1000000000" "No" "F"

"1000000000" "No" "M"

"1000000000" "No" "F"

"1000000000" "No" "F"

"1000000000" "No" "M"

"1100000000" "No" "F"

"1000000000" "No" "M"

"1000000000" "No" "F"

"1000000000" "No" "F"

"1000000000" "No" "M"

"1010000000" "No" "M"

"1000000000" "No" "M"

"1000000000" "No" "F"

"1000000000" "No" "F"

"1000000000" "No" "M"

"1100000000" "No" "F"

"1000000000" "No" "F"

"1000000000" "No" "M"

"1001000000" "No" "F"

"1000000000" "No" "M"

"1000000000" "No" "F"

"1000000000" "No" "F"

"1000000000" "No" "F"

"1000000000" "No" "F"

"1000000000" "No" "M"

"1000000000" "No" "F"

"1000000000" "No" "F"

"1000000000" "No" "F"

"1000000000" "No" "F"

"1000000000" "No" "F"

"1000000000" "No" "F"

"1000000000" "No" "M"

"1000000000" "No" "M"

"1000000000" "No" "M"

"1000000000" "No" "M"

"1000000000" "No" "F"

"1000000000" "No" "M"

"1000000000" "No" "M"

"1000000000" "No" "M"

"1000000000" "No" "F"

"1100000000" "No" "F"

"1000000100" "No" "M"

"1000000000" "No" "F"

"1000000000" "No" "F"

"1000000000" "No" "M"

"1000000000" "No" "F"

"1000000000" "No" "M"

"1000000000" "No" "M"

"1010000000" "No" "F"

"1000000000" "No" "M"

"1000000000" "No" "M"

"1000000010" "No" "M"

"1000000000" "No" "F"

"1100000000" "No" "F"

"1100000000" "No" "M"

"1000000000" "No" "M"

"1000000000" "No" "F"

"1000000000" "No" "F"

"1000000000" "No" "M"

"1000000000" "No" "F"

"1000000000" "No" "M"

"1000000000" "No" "F"

"1000000000" "No" "M"

"1000000000" "No" "F"

"1000000000" "No" "F"

"1000000000" "No" "F"

"1000000000" "No" "F"

"1001000000" "No" "F"

"1000000000" "No" "M"

"1000000000" "No" "M"

"1000000000" "No" "M"

"1000000000" "No" "F"

"1010000000" "No" "M"

"1000000000" "No" "M"

"1000000000" "No" "M"

"1000000100" "No" "M"

"1000000000" "No" "F"

"1000000000" "No" "M"

"1000000000" "No" "F"

"1000000000" "No" "M"

"1000000000" "No" "F"

"1000000000" "No" "M"

"1000000000" "No" "F"

"1000000000" "No" "F"

"1000000000" "No" "F"

"1000000000" "No" "F"

"1000000000" "No" "M"

"1000000000" "No" "M"

"1000000000" "No" "M"

"1000000000" "No" "M"

"1000000000" "No" "M"

"1000000000" "No" "M"

"1000000000" "No" "F"

"1000000000" "No" "F"

"1000000000" "No" "F"

"1000000000" "No" "M"

"1000000000" "No" "M"

"1000000000" "No" "F"

"1000000000" "No" "M"

"1000000000" "No" "F"

"1000000000" "No" "M"

"1000000000" "No" "M"

"1100000000" "No" "F"

"1000000000" "No" "M"

"1000000000" "No" "M"

"1000000000" "No" "F"

"1000000000" "No" "F"

"1000000000" "No" "M"

"1000000000" "No" "M"

"1000000000" "No" "M"

"1100000000" "No" "M"

"1000000000" "No" "M"

"1000000000" "No" "M"

"1000000000" "No" "M"

"1000000000" "No" "M"

"1000000000" "No" "M"

"1000000000" "No" "M"

"1000000000" "No" "F"

"1000000000" "No" "M"

"1000000010" "No" "M"

"1000000000" "No" "M"

"1000000000" "No" "M"

"1000000000" "No" "M"

"1000000000" "No" "M"

"1000000000" "No" "F"

"1000000000" "No" "M"

"1000000000" "No" "M"

"1000000000" "No" "M"

"1000000000" "No" "M"

"1000000000" "No" "M"

"1000000000" "No" "M"

"1000000000" "No" "F"

"1001000001" "No" "M"

"1000000000" "No" "M"

"1000000000" "No" "F"

"1000000000" "No" "F"

"1000000000" "No" "M"

"1100000000" "No" "M"

"1000000100" "No" "M"

"1000000000" "No" "F"

"1000000000" "No" "M"

"1000000000" "No" "M"

"1000000000" "No" "F"

"1000000000" "No" "F"

"1000000000" "No" "M"

"1000000000" "No" "M"

"1000000000" "No" "M"

"1000000000" "No" "M"

"1000000000" "No" "M"

"1000000000" "No" "M"

"1000000000" "No" "M"

"1000000000" "No" "M"

"1000000000" "No" "M"

"1000000000" "No" "M"

"1000000000" "No" "F"

"1000000000" "No" "M"

"1100000000" "No" "M"

"1000000000" "No" "F"

"1000000000" "No" "M"

"1000000000" "No" "M"

"1000000000" "No" "M"

"1000000000" "No" "M"

"1000000000" "No" "M"

"1100000000" "No" "M"

"1000000000" "No" "M"

"1000000000" "No" "M"

"1000000000" "No" "M"

"1000000000" "No" "F"

"1000010000" "No" "M"

"1000000000" "No" "M"

"1000000000" "No" "M"

"1000000000" "No" "M"

"1000000000" "No" "M"

"1000000000" "No" "M"

"1000000100" "No" "M"

"1000000000" "No" "F"

"1000000000" "No" "F"

"1000000000" "No" "F"

"1000000000" "No" "M"

"1000000000" "No" "F"

"1000000000" "No" "M"

"1000000000" "No" "F"

"1000000000" "No" "M"

"1000000000" "No" "F"

"1000000000" "No" "M"

"1000000000" "No" "F"

"1000000000" "No" "F"

"1000000000" "No" "F"

"1000000000" "No" "F"

"1000000000" "No" "M"

"1000000000" "No" "M"

"1000000000" "No" "F"

"1000000000" "No" "M"

"1000000000" "No" "F"

"1000000000" "No" "F"

"1000000000" "No" "M"

"1000000000" "No" "M"

"1000000000" "No" "F"

"1000000000" "No" "F"

"1000000000" "No" "M"

"1000000000" "No" "M"

"1000000000" "No" "M"

"1000000000" "No" "F"

"1000000000" "No" "F"

"1000000000" "No" "M"

"1000000000" "No" "F"

"1000000000" "No" "U"

"1000000000" "No" "M"

"1000000000" "No" "F"

"1000100000" "No" "F"

"1000000000" "No" "M"

"1000000000" "No" "M"

"1000000000" "No" "F"

"1000000000" "No" "F"

"1000000000" "No" "M"

"1000000000" "No" "F"

"1000000000" "No" "F"

"1000000000" "No" "M"

"1000000000" "No" "F"

"1000000000" "No" "F"

"1000000000" "No" "F"

"1000000000" "No" "M"

"1000000000" "No" "F"

"1000000000" "No" "M"

"1000000000" "No" "M"

"1000000000" "No" "M"

"1000000000" "No" "M"

"1000000000" "No" "M"

"1000000000" "No" "M"

"1000000000" "No" "F"

"1000000000" "No" "M"

"1100000000" "No" "M"

"1000000000" "No" "M"

"1000000000" "No" "M"

"1000000000" "No" "F"

"1010000000" "No" "M"

"1000000000" "No" "M"

"1000000000" "No" "M"

"1000000000" "No" "M"

"1000000000" "No" "M"

"1000000000" "No" "F"

"1000000000" "No" "M"

"1000000000" "No" "M"

"1000000000" "No" "F"

"1000000000" "No" "F"

"1010000000" "No" "M"

"1000000000" "No" "M"

"1000000000" "No" "M"

"1000000000" "No" "M"

"1000000000" "No" "M"

"1000000000" "No" "F"

"1000000000" "No" "M"

"1000000000" "No" "M"

"1000000000" "No" "F"

"1000000000" "No" "F"

"1000000000" "No" "F"

"1000000000" "No" "M"

"1000000000" "No" "F"

"1000000000" "No" "M"

"1000000000" "No" "F"

"1000000000" "No" "M"

"1000000000" "No" "F"

"1000000000" "No" "M"

"1000000000" "No" "F"

"1000000000" "No" "M"

"1000000000" "No" "F"

"1001100000" "No" "M"

"1000000000" "No" "F"

"1000000000" "No" "M"

"1000000000" "No" "M"

"1000000000" "No" "F"

"1000000000" "No" "M"

"1000000000" "No" "M"

"1000000000" "No" "M"

"1000000000" "No" "F"

"1000000000" "No" "F"

"1000000000" "No" "M"

"1000000000" "No" "M"

"1000000000" "No" "F"

"1000000000" "No" "M"

"1000000000" "No" "M"

"1000000000" "No" "M"

"1000000000" "No" "F"

"1000000000" "No" "F"

"1000000000" "No" "M"

"1100000000" "No" "M"

"1000000000" "No" "M"

"1000000000" "No" "M"

"1000000000" "No" "M"

"1000000000" "No" "M"

"1000000000" "No" "F"

"1100000000" "No" "M"

"1000000000" "No" "M"

"1000000000" "No" "M"

"1000000000" "No" "M"

"1000000000" "No" "M"

"1000000000" "No" "M"

"1000000000" "No" "F"

"1000000000" "No" "M"

"1000000000" "No" "M"

"1000000000" "No" "M"

"1000000000" "No" "F"

"1000000000" "No" "M"

"1000000000" "No" "F"

"1000000000" "No" "M"

"1000000000" "No" "M"

"1000000000" "No" "F"

"1000000000" "No" "M"

"1000000000" "No" "F"

"1000000000" "No" "F"

"1000000000" "No" "M"

"1000000000" "No" "M"

"1000000000" "No" "F"

"1000000000" "No" "M"

"1000000000" "No" "F"

"1000000000" "No" "F"

"1000000000" "No" "M"

"1000000000" "No" "M"

"1000000000" "No" "F"

"1000000000" "No" "F"

"1000000000" "No" "F"

"1000000000" "No" "M"

"1000000000" "No" "M"

"1000000000" "No" "F"

"1000000000" "No" "M"

"1000000000" "No" "F"

"1000000000" "No" "M"

"1000000000" "No" "F"

"1000000000" "No" "M"

"1000000000" "No" "M"

"1000000000" "No" "M"

"1000000000" "No" "M"

"1000000000" "No" "M"

"1000000000" "No" "F"

"1000000000" "No" "M"

"1000000000" "No" "M"

"1000000000" "No" "F"

"1000000000" "No" "M"

"1000000000" "No" "F"

"1000000000" "No" "F"

"1000000000" "No" "F"

"1000000000" "No" "F"

"1000000000" "No" "F"

"1000000000" "No" "F"

"1100000000" "No" "M"

"1000000000" "No" "M"

"1000000000" "No" "F"

"1100000000" "No" "M"

"1000000000" "No" "F"

"1000000000" "No" "M"

"1000000000" "No" "M"

"1000000000" "No" "M"

"1000000000" "No" "M"

"1000000000" "No" "F"

"1000000000" "No" "M"

"1000000000" "No" "F"

"1000000000" "No" "M"

"1000000000" "No" "M"

"1000000000" "No" "M"

"1000000000" "No" "M"

"1000000000" "No" "M"

"1000000000" "No" "M"

"1000000000" "No" "M"

"1000000000" "No" "M"

"1000000000" "No" "M"

"1000000000" "No" "M"

"1000000000" "No" "M"

"1000000000" "No" "M"

"1000000000" "No" "M"

"1000000000" "No" "M"

"1000000000" "No" "M"

"1000000000" "No" "U"

"1000000000" "No" "M"

"1000000000" "No" "U"

"1000000000" "No" "M"

"1000000000" "No" "M"

"1000000000" "No" "M"

"1000000000" "No" "F"

"1000000000" "No" "F"

"1000000000" "No" "F"

"1000000000" "No" "F"

"1000000000" "No" "M"

"1000000000" "No" "M"

"1000000000" "No" "M"

"1000000000" "No" "F"

"1000000000" "No" "M"

"1000110000" "No" "F"

"1001001000" "No" "M"

"1000000000" "No" "F"

"1000000000" "No" "M"

"1000000000" "No" "F"

"1000000000" "No" "F"

"1000000000" "No" "M"

"1000000000" "No" "M"

"1000000000" "No" "M"

"1000000000" "No" "M"

"1000000000" "No" "M"

"1000000000" "No" "M"

"1000000000" "No" "F"

"1000000000" "No" "M"

"1000000000" "No" "F"

"1000000000" "No" "M"

"1000000000" "No" "M"

"1000000000" "No" "M"

"1000000000" "No" "M"

"1000000000" "No" "M"

"1000000000" "No" "F"

"1000000000" "No" "F"

"1000000000" "No" "M"

"1000000000" "No" "F"

"1000000000" "No" "M"

"1000000000" "No" "M"

"1000000000" "No" "M"

"1000000000" "No" "F"

"1000000000" "No" "F"

"1000000000" "No" "F"

"1000000000" "No" "M"

"1000000000" "No" "F"

"1000000000" "No" "F"

"1000000000" "No" "F"

"1000000000" "No" "F"

"1000000000" "No" "M"

"1000000000" "No" "F"

"1000000000" "No" "F"

"1000000000" "No" "M"

"1000100000" "No" "M"

"1000000000" "No" "M"

"1100000000" "No" "F"

"1000000000" "No" "M"

"1000000000" "No" "F"

"1000000000" "No" "F"

"1000000000" "No" "M"

"1000000000" "No" "F"

"1000000000" "No" "F"

"1000000000" "No" "M"

"1000000000" "No" "M"

"1000000000" "No" "M"

"1000000000" "No" "F"

"1000000000" "No" "M"

"1000000000" "No" "F"

"1000000000" "No" "M"

"1000000000" "No" "F"

"1000000000" "No" "M"

"1000000000" "No" "F"

"1000000000" "No" "M"

"1000000000" "No" "M"

"1000000000" "No" "F"

"1000000000" "No" "M"

"1000000000" "No" "F"

"1000000000" "No" "M"

"1000000000" "No" "M"

"1100000000" "No" "U"

"1000000000" "No" "F"

"1000000000" "No" "F"

"1000000000" "No" "F"

"1000000000" "No" "F"

"1000000000" "No" "M"

"1000000000" "No" "M"

"1000000000" "No" "M"

"1000000000" "No" "M"

"1000000000" "No" "M"

"1000000000" "No" "M"

"1001000000" "No" "F"

"1000000000" "No" "M"

"1000000000" "No" "M"

"1000000000" "No" "M"

"1000000000" "No" "M"

"1000000000" "No" "F"

"1000000000" "No" "F"

"1000000000" "No" "M"

"1000000000" "No" "F"

"1000000000" "No" "M"

"1000000000" "No" "M"

"1000000000" "No" "M"

"1000000000" "No" "F"

"1000000000" "No" "M"

"1000000000" "No" "F"

"1000000000" "No" "M"

"1000000000" "No" "M"

"1000000000" "No" "F"

"1000000000" "No" "M"

"1000000000" "No" "M"

"1000000010" "No" "M"

"1000000000" "No" "M"

"1000000000" "No" "F"

"1000000000" "No" "M"

"1000000000" "No" "M"

"1000000000" "No" "F"

"1000000000" "No" "F"

"1000000000" "No" "F"

"1000000000" "No" "M"

"1000000000" "No" "M"

"1000000000" "No" "M"

"1000000000" "No" "F"

"1000000000" "No" "M"

"1000000000" "No" "F"

"1000000000" "No" "M"

"1000000000" "No" "F"

"1000000000" "No" "F"

"1000000000" "No" "M"

"1000000000" "No" "F"

"1000000000" "No" "F"

"1100000000" "No" "M"

"1000000000" "No" "M"

"1000010000" "No" "M"

"1000000000" "No" "M"

"1000000000" "No" "F"

"1000000000" "No" "M"

"1000000000" "No" "M"

"1100000000" "No" "M"

"1000000000" "No" "M"

"1000000000" "No" "F"

"1000000000" "No" "F"

"1000000000" "No" "M"

"1000000000" "No" "M"

"1000000000" "No" "F"

"1000000000" "No" "M"

"1000000000" "No" "M"

"1000000000" "No" "F"

"1000000000" "No" "F"

"1000000000" "No" "F"

"1000000000" "No" "F"

"1000000000" "No" "M"

"1000000000" "No" "F"

"1001000000" "No" "F"

"1000000000" "No" "F"

"1000000000" "No" "M"

"1000000000" "No" "M"

"1000000000" "No" "M"

"1000000000" "No" "M"

"1000000000" "No" "F"

"1100000000" "No" "M"

"1000000000" "No" "M"

"1000000000" "No" "M"

"1000000000" "No" "M"

"1000000000" "No" "M"

"1000000000" "No" "M"

"1000000000" "No" "M"

"1000100000" "No" "F"

"1000000000" "No" "F"

"1010000000" "No" "M"

"1000000000" "No" "M"

"1000000000" "No" "M"

"1000000000" "No" "M"

"1000000000" "No" "F"

"1000000000" "No" "F"

"1000000000" "No" "M"

"1001000000" "No" "M"

"1000000000" "No" "M"

"1000000000" "No" "M"

"1000000000" "No" "M"

"1000000000" "No" "F"

"1000000000" "No" "M"

"1000001000" "No" "F"

"1000000000" "No" "F"

"1000000000" "No" "M"

"1000000000" "No" "M"

"1000000000" "No" "M"

"1000000000" "No" "M"

"1000000000" "No" "F"

"1000000000" "No" "F"

"1000000000" "No" "M"

"1000000000" "No" "F"

"1000000000" "No" "M"

"1000000000" "No" "F"

"1000000000" "No" "M"

"1000000000" "No" "F"

"1000000000" "No" "F"

"1000000000" "No" "F"

"1000000000" "No" "F"

"1000000000" "No" "F"

"1000000000" "No" "F"

"1100000000" "No" "M"

"1000000000" "No" "M"

"1000001000" "No" "M"

"1000000000" "No" "F"

"1000000000" "No" "F"

"1000000000" "No" "F"

"1000000000" "No" "F"

"1000000000" "No" "F"

"1000000000" "No" "M"

"1000000000" "No" "F"

"1000000000" "No" "M"

"1101000000" "No" "M"

"1000000000" "No" "M"

"1000000000" "No" "F"

"1000000000" "No" "F"

"1000000000" "No" "M"

"1000000000" "No" "F"

"1000000000" "No" "F"

"1000000000" "No" "M"

"1000000000" "No" "F"

"1000000000" "No" "F"

"1000000000" "No" "F"

"1000000000" "No" "M"

"1000100000" "No" "M"

"1000000000" "No" "M"

"1000000000" "No" "F"

"1100000000" "No" "M"

"1000000000" "No" "F"

"1000000000" "No" "F"

"1000000000" "No" "M"

"1000000000" "No" "M"

"1000000000" "No" "M"

"1010000000" "No" "M"

"1000000000" "No" "M"

"1010000000" "No" "M"

"1000000000" "No" "F"

"1000000000" "No" "F"

"1000000000" "No" "F"

"1000000000" "No" "F"

"1000000000" "No" "M"

"1000000000" "No" "F"

"1000000000" "No" "F"

"1000000000" "No" "M"

"1000000000" "No" "M"

"1000000000" "No" "F"

"1000000000" "No" "M"

"1000000000" "No" "F"

"1000000000" "No" "F"

"1001000000" "No" "M"

"1000000000" "No" "F"

"1000000000" "No" "F"

"1000000000" "No" "F"

"1000000000" "No" "F"

"1000000000" "No" "M"

"1000000000" "No" "F"

"1000000000" "No" "F"

"1000000000" "No" "M"

"1000000000" "No" "F"

"1000000000" "No" "M"

"1000000000" "No" "M"

"1100000000" "No" "M"

"1000000000" "No" "F"

"1000000000" "No" "F"

"1000000000" "No" "M"

"1000000000" "No" "F"

"1000000000" "No" "M"

"1000000000" "No" "F"

"1000000000" "No" "M"

"1000000000" "No" "M"

"1000000000" "No" "M"

"1000000000" "No" "M"

"1000000000" "No" "M"

"1000000000" "No" "M"

"1000000000" "No" "M"

"1000000000" "No" "F"

"1000000000" "No" "M"

"1010000000" "No" "F"

"1000000000" "No" "F"

"1000000000" "No" "M"

"1000000000" "No" "M"

"1000000000" "No" "F"

"1000000000" "No" "M"

"1001000000" "No" "M"

"1000000000" "No" "F"

"1000000000" "No" "M"

"1000000000" "No" "F"

"1000000000" "No" "F"

"1000000000" "No" "F"

"1000000000" "No" "F"

"1000000000" "No" "M"

"1000000000" "No" "M"

"1000000000" "No" "M"

"1000000000" "No" "F"

"1000000000" "No" "M"

"1000000000" "No" "F"

"1000000000" "No" "M"

"1000000000" "No" "F"

"1000000000" "No" "M"

"1000000000" "No" "M"

"1000000000" "No" "M"

"1000000000" "No" "M"

"1000000000" "No" "M"

"1000000000" "No" "F"

"1000000000" "No" "F"

"1000000000" "No" "M"

"1000000000" "No" "F"

"1000000000" "No" "M"

"1000000000" "No" "M"

"1000000000" "No" "M"

"1000000000" "No" "F"

"1000000000" "No" "F"

"1000000000" "No" "F"

"1000000000" "No" "M"

"1100000000" "No" "F"

"1000000000" "No" "M"

"1000000000" "No" "F"

"1100000000" "No" "F"

"1000000000" "No" "M"

"1000000000" "No" "M"

"1000000000" "No" "M"

"1000000000" "No" "F"

"1000000000" "No" "M"

"1000000000" "No" "M"

"1000000000" "No" "M"

"1000000000" "No" "F"

"1000000000" "No" "F"

"1000000000" "No" "M"

"1000000000" "No" "M"

"1000000000" "No" "F"

"1000000000" "No" "F"

"1000000000" "No" "M"

"1010000000" "No" "F"

"1000000000" "No" "M"

"1000000000" "No" "M"

"1000000000" "No" "F"

"1000000000" "No" "M"

"1000000000" "No" "M"

"1000000000" "No" "M"

"1000000000" "No" "M"

"1000000000" "No" "M"

"1000000000" "No" "M"

"1000000000" "No" "F"

"1000000000" "No" "F"

"1000000000" "No" "M"

"1000000000" "No" "M"

"1000000000" "No" "M"

"1000000000" "No" "M"

"1000000000" "No" "M"

"1000000000" "No" "F"

"1000000000" "No" "M"

"1000000000" "No" "M"

"1000000000" "No" "F"

"1000000000" "No" "M"

"1000000000" "No" "M"

"1000000000" "No" "M"

"1000000000" "No" "F"

"1000000000" "No" "M"

"1000000000" "No" "F"

"1000000000" "No" "M"

"1000000000" "No" "M"

"1000000000" "No" "M"

"1000000000" "No" "M"

"1000000000" "No" "F"

"1000000000" "No" "M"

"1000000000" "No" "M"

"1000000000" "No" "F"

"1000000000" "No" "F"

"1000000000" "No" "F"

"1000000000" "No" "F"

"1000000000" "No" "F"

"1000000000" "No" "F"

"1000000000" "No" "F"

"1100000000" "No" "M"

"1000000000" "No" "F"

"1000000000" "No" "F"

"1000000000" "No" "M"

"1000000000" "No" "F"

"1000000000" "No" "F"

"1010000000" "No" "M"

"1000000000" "No" "F"

"1000000000" "No" "M"

"1000000000" "No" "M"

"1000000000" "No" "M"

"1000000000" "No" "M"

"1000000000" "No" "M"

"1000000000" "No" "F"

"1000000000" "No" "M"

"1000000000" "No" "M"

"1000000000" "No" "M"

"1000000000" "No" "F"

"1000000000" "No" "M"

"1000000000" "No" "M"

"1000000000" "No" "M"

"1000000000" "No" "F"

"1000000000" "No" "F"

"1000000000" "No" "M"

"1000000000" "No" "F"

"1000000000" "No" "M"

"1100000000" "No" "M"

"1000000000" "No" "M"

"1000000000" "No" "M"

"1000000000" "No" "F"

"1000000000" "No" "F"

"1000000000" "No" "F"

"1000000000" "No" "F"

"1000000000" "No" "M"

"1000000000" "No" "F"

"1000000000" "No" "F"

"1000000000" "No" "M"

"1000000000" "No" "F"

"1000000000" "No" "M"

"1000000000" "No" "M"

"1000000000" "No" "M"

"1000000000" "No" "M"

"1000000000" "No" "M"

"1000000000" "No" "M"

"1000000000" "No" "M"

"1000000000" "No" "F"

"1000000000" "No" "F"

"1000000000" "No" "M"

"1000000000" "No" "M"

"1000000000" "No" "M"

"1000000000" "No" "M"

"1000000000" "No" "M"

"1000000000" "No" "M"

"1000000000" "No" "M"

"1000000000" "No" "M"

"1100000000" "No" "M"

"1000000000" "No" "M"

"1100000000" "No" "M"

"1000000000" "No" "F"

"1000000000" "No" "M"

"1100000000" "No" "M"

"1000000000" "No" "F"

"1000000000" "No" "F"

"1000000000" "No" "M"

"1000000000" "No" "F"

"1000000000" "No" "M"

"1000000000" "No" "M"

"1000000000" "No" "F"

"1100000000" "No" "M"

"1000000000" "No" "M"

"1000000000" "No" "F"

"1000000000" "No" "F"

"1010000000" "No" "F"

"1000000000" "No" "M"

"1000000000" "No" "M"

"1000000000" "No" "M"

"1000000000" "No" "M"

"1000000000" "No" "F"

"1000000000" "No" "M"

"1000000000" "No" "F"

"1000000000" "No" "F"

"1000000000" "No" "M"

"1100000000" "No" "M"

"1000000000" "No" "F"

"1000000000" "No" "M"

"1000010000" "No" "F"

"1100000000" "No" "M"

"1100000000" "No" "M"

"1000000000" "No" "M"

"1000000000" "No" "M"

"1000000000" "No" "F"

"1000000000" "No" "M"

"1000000000" "No" "M"

"1000000000" "No" "M"

"1000000000" "No" "M"

"1000000000" "No" "M"

"1000000000" "No" "M"

"1000000000" "No" "M"

"1000000000" "No" "M"

"1000000000" "No" "M"

"1000000000" "No" "F"

"1000000000" "No" "M"

"1100000000" "No" "M"

"1000000000" "No" "M"

"1000000000" "No" "M"

"1000000000" "No" "M"

"1000000000" "No" "F"

"1000000000" "No" "F"

"1100000000" "No" "M"

"1000000000" "No" "M"

"1001000000" "No" "M"

"1000000000" "No" "M"

"1000000000" "No" "F"

"1000000000" "No" "M"

"1000000100" "No" "M"

"1000000100" "No" "M"

"1100000000" "No" "F"

"1000000000" "No" "F"

"1000000000" "No" "M"

"1000000000" "No" "F"

"1000000000" "No" "F"

"1000000000" "No" "F"

"1100000000" "No" "M"

"1000000000" "No" "M"

"1000000000" "No" "M"

"1000001000" "No" "M"

"1000000000" "No" "M"

"1000000000" "No" "F"

"1000000000" "No" "M"

"1000000000" "No" "F"

"1000000000" "No" "M"

"1000000000" "No" "M"

"1100000000" "No" "M"

"1100000000" "No" "M"

"1000000000" "No" "F"

"1000000000" "No" "M"

"1000000000" "No" "F"

"1000000000" "No" "M"

"1000000000" "No" "M"

"1000000000" "No" "M"

"1100000000" "No" "F"

"1000000000" "No" "M"

"1000000000" "No" "M"

"1000000000" "No" "M"

"1000000000" "No" "M"

"1100000000" "No" "F"

"1000000000" "No" "F"

"1000000000" "No" "M"

"1000000000" "No" "M"

"1000000000" "No" "F"

"1000010000" "No" "M"

"1000000000" "No" "M"

"1000000000" "No" "F"

"1000000000" "No" "M"

"1000010000" "No" "M"

"1000000000" "No" "F"

"1000000000" "No" "M"

"1000000000" "No" "M"

"1000000000" "No" "M"

"1000000000" "No" "M"

"1000000000" "No" "M"

"1000010000" "No" "M"

"1000000000" "No" "M"

"1000000000" "No" "F"

"1000000000" "No" "M"

"1000000000" "No" "M"

"1000000000" "No" "M"

"1000000000" "No" "M"

"1000000100" "No" "M"

"1000000000" "No" "F"

"1000000000" "No" "M"

"1000000000" "No" "F"

"1000000000" "No" "M"

"1000000000" "No" "M"

"1000000000" "No" "M"

"1000000000" "No" "M"

"1000000000" "No" "M"

"1000000000" "No" "M"

"1000000000" "No" "F"

"1000000000" "No" "F"

"1000000000" "No" "F"

"1000000000" "No" "F"

"1000000000" "No" "M"

"1000000000" "No" "M"

"1100000000" "No" "M"

"1000000000" "No" "F"

"1000000000" "No" "M"

"1100000000" "No" "M"

"1000000000" "No" "M"

"1000000000" "No" "M"

"1000000000" "No" "M"

"1000000100" "No" "M"

"1000000000" "No" "M"

"1000000000" "No" "M"

"1000000000" "No" "M"

"1000000000" "No" "M"

"1000000000" "No" "M"

"1000000000" "No" "F"

"1000000000" "No" "M"

"1100000000" "No" "M"

"1000000000" "No" "M"

"1010000000" "No" "M"

"1000000000" "No" "M"

"1000000000" "No" "M"

"1000000000" "No" "M"

"1000000000" "No" "M"

"1000000000" "No" "F"

"1000000000" "No" "M"

"1000000000" "No" "F"

"1000001000" "No" "F"

"1000000000" "No" "F"

"1000000000" "No" "M"

"1000000000" "No" "M"

"1000000000" "No" "M"

"1000000000" "No" "M"

"1000000000" "No" "F"

"1000000000" "No" "M"

"1000000000" "No" "M"

"1000000000" "No" "M"

"1000000000" "No" "F"

"1000000000" "No" "F"

"1000000000" "No" "M"

"1000000000" "No" "M"

"1000000000" "No" "F"

"1000000000" "No" "M"

"1000000000" "No" "F"

"1000000000" "No" "M"

"1000000000" "No" "M"

"1000000000" "No" "M"

"1000000000" "No" "M"

"1000000000" "No" "M"

"1000000000" "No" "M"

"1000000000" "No" "M"

"1000000000" "No" "M"

"1000000000" "No" "M"

"1001000000" "No" "M"

"1000000000" "No" "F"

"1000000000" "No" "F"

"1000000000" "No" "M"

"1000000000" "No" "M"

"1000000000" "No" "M"

"1000000000" "No" "M"

"1000000000" "No" "M"

"1000000000" "No" "M"

"1000000000" "No" "M"

"1000000000" "No" "M"

"1000000000" "No" "F"

"1000000000" "No" "F"

"1000000000" "No" "M"

"1000000000" "No" "F"

"1010000000" "No" "M"

"0100000000" "No" "M"

"0100000000" "No" "M"

"0001010000" "Yes" "M"

"0010000000" "Yes" "M"

"1000000000" "Yes" "F"

"0100000000" "Yes" "M"

"1000000000" "Yes" "M"

"0100000000" "Yes" "F"

"0100000000" "Yes" "F"

"0001000000" "Yes" "M"

"0100000000" "Yes" "F"

"1000000000" "Yes" "F"

"0000000001" "Yes" "M"

"0001000000" "Yes" "F"

"0000001000" "Yes" "M"

"0001000000" "Yes" "M"

"0000100000" "Yes" "M"

"0010000000" "Yes" "M"

"0100000000" "Yes" "F"

"0001000000" "Yes" "M"

"0000100000" "Yes" "F"

"1000000000" "Yes" "F"

"1000000000" "Yes" "F"

"0000000010" "Yes" "F"

"0001000000" "Yes" "F"

"1000000000" "Yes" "F"

"0010000000" "No" "F"

"0011000000" "No" "F"

"0001000000" "No" "F"

"1000000000" "No" "F"

"0000010000" "Yes" "F"

"0000100000" "Yes" "M"

"0001000000" "Yes" "M"

"0001000000" "Yes" "M"

"0001110000" "Yes" "M"

"1000000000" "Yes" "M"

"0001000000" "Yes" "M"

"0001000000" "Yes" "M"

"0001000000" "Yes" "M"

"1000000000" "Yes" "M"

"0000001000" "Yes" "F"

"0001000000" "Yes" "F"

"0100000000" "Yes" "F"

"0000000001" "Yes" "F"

"1000000000" "No" "M"

"1000000000" "No" "M"

"1000000000" "No" "M"

"1000000000" "No" "M"

"1001000000" "No" "M"

"1100000000" "No" "F"

"1000000000" "No" "F"

"1000000000" "No" "M"

"1001000000" "No" "M"

"1000000000" "No" "M"

"1000000000" "No" "F"

"1000000000" "No" "M"

"1000000000" "No" "M"

"1000000000" "No" "M"

"1000000000" "No" "M"

"1000000000" "No" "F"

"1000000000" "No" "F"

"1000000000" "No" "M"

"1000000000" "No" "M"

"1000000000" "No" "F"

"1000000000" "No" "M"

"1000000000" "No" "M"

"1000000000" "No" "M"

"1000000000" "No" "M"

"1010000000" "No" "M"

"1000000000" "No" "F"

"1000000000" "No" "F"

"1000000000" "No" "M"

"1000000000" "No" "M"

"1000000000" "No" "M"

"1000000000" "No" "F"

"1000000000" "No" "M"

"1000000000" "No" "M"

"1000000000" "No" "M"

"1000000000" "No" "M"

"1000000000" "No" "F"

"1000000000" "No" "F"

"1000000000" "No" "M"

"1000000000" "No" "M"

"1000000000" "No" "F"

"1000000000" "No" "M"

"1000000000" "No" "M"

"1000000000" "No" "M"

"1000000000" "No" "F"

"1000000000" "No" "F"

"1000000000" "No" "M"

"1000000000" "No" "F"

"1000000000" "No" "F"

"1000000000" "No" "M"

"1000000000" "No" "M"

"1000000000" "No" "M"

"1000000000" "No" "M"

"1000000000" "No" "M"

"1000000000" "No" "M"

"1000000000" "No" "M"

"1000000000" "No" "F"

"1000000000" "No" "M"

"1000000000" "No" "F"

"1000000000" "No" "M"

"1000000000" "No" "M"

"1000000000" "No" "M"

"1000000000" "No" "F"

"1000000000" "No" "M"

"1000000000" "No" "M"

"1000000000" "No" "M"

"1000000000" "No" "M"

"1000000000" "No" "F"

"1000000000" "No" "M"

"1000000000" "No" "M"

"1000000000" "No" "M"

"1000000000" "No" "M"

"1000000000" "No" "M"

"1000000000" "No" "F"

"1000000000" "No" "M"

"1000000000" "No" "F"

"1000000000" "No" "M"

"1000000000" "No" "M"

"1000000000" "No" "F"

"1000000000" "No" "M"

"1000000000" "No" "F"

"1000000000" "No" "M"

"1000010000" "No" "M"

"1000000000" "No" "M"

"1000000000" "No" "M"

"1000000000" "No" "M"

"1000000000" "No" "F"

"1000000000" "No" "F"

"1000000000" "No" "M"

"1000000000" "No" "M"

"1000000000" "No" "M"

"1000000000" "No" "M"

"1000000000" "No" "F"

"1000000000" "No" "M"

"1000000000" "No" "F"

"1000000000" "No" "M"

"1000000000" "No" "M"

"1000000000" "No" "M"

"1000000000" "No" "M"

"1000000000" "No" "M"

"1000000000" "No" "M"

"1000000000" "No" "M"

"1100000000" "No" "F"

"1000000000" "No" "M"

"1000000000" "No" "M"

"1000000000" "No" "M"

"1000000000" "No" "M"

"1000000000" "No" "M"

"1000000000" "No" "M"

"1000000000" "No" "F"

"1000000000" "No" "F"

"1000000000" "No" "M"

"1000000000" "No" "M"

"1000000000" "No" "F"

"1000000000" "No" "M"

"1000000000" "No" "M"

"1000000000" "No" "M"

"1000000000" "No" "M"

"1000000000" "No" "M"

"1000000000" "No" "M"

"1000000000" "No" "M"

"1000000000" "No" "M"

"1000000000" "No" "M"

"1000000000" "No" "F"

"1000000000" "No" "M"

"1000000000" "No" "F"

"1000000000" "No" "F"

"1000000000" "No" "M"

"1000000000" "No" "M"

"1100000000" "No" "F"

"1000000000" "No" "F"

"1000000000" "No" "M"

"1000000000" "No" "M"

"1000000000" "No" "M"

"1000000000" "No" "F"

"1000000000" "No" "M"

"1000000000" "No" "F"

"1000000000" "No" "F"

"1000000000" "No" "M"

"1000000000" "No" "F"

"1000000000" "No" "F"

"1000000000" "No" "M"

"1000000000" "No" "M"

"1000000000" "No" "F"

"1000000000" "No" "F"

"1000000000" "No" "F"

"1000000000" "No" "M"

"1000000000" "No" "M"

"1000000000" "No" "M"

"1000000000" "No" "F"

"1000000000" "No" "M"

"1000000000" "No" "F"

"1000000000" "No" "M"

"1000000000" "No" "F"

"1000000000" "No" "M"

"1000000000" "No" "F"

"1000000000" "No" "M"

"1000000000" "No" "M"

"1000000000" "No" "M"

"1000000000" "No" "F"

"1000000000" "No" "F"

"1000000000" "No" "M"

"1000000000" "No" "M"

"1000000000" "No" "M"

"1000000000" "No" "F"

"1000000000" "No" "F"

"1000000000" "No" "F"

"1000000000" "No" "F"

"1011010010" "No" "M"

"1000000000" "No" "M"

"1000000000" "No" "M"

"1000000000" "No" "M"

"1000000000" "No" "M"

"1000000000" "No" "F"

"1000000000" "No" "F"

"1000000000" "No" "M"

"1000000000" "No" "F"

"1000000000" "No" "F"

"1000000000" "No" "M"

"1000000000" "No" "F"

"1000000000" "No" "M"

"1001000000" "No" "M"

"1100000000" "No" "M"

"1000000000" "No" "F"

"1000000000" "No" "M"

"1000000000" "No" "F"

"1000000000" "No" "F"

"1000000000" "No" "M"

"1000000000" "No" "M"

"1000000000" "No" "F"

"1000000000" "No" "F"

"1000000000" "No" "F"

"1000000000" "No" "M"

"1000000000" "No" "M"

"1000000000" "No" "F"

"1000000000" "No" "M"

"1000000000" "No" "M"

"1000000000" "No" "M"

"1000000000" "No" "F"

"1100000000" "No" "M"

"1000000000" "No" "M"

"1000000000" "No" "F"

"1000000000" "No" "M"

"1000000000" "No" "M"

"1000000000" "No" "F"

"1000000000" "No" "M"

"1000000000" "No" "M"

"1000000000" "No" "M"

"1000010000" "No" "M"

"1000000000" "No" "M"

"1000000000" "No" "F"

"1000000000" "No" "F"

"1000000000" "No" "F"

"1000000000" "No" "F"

"1000000000" "No" "M"

"1000000000" "No" "F"

"1000000000" "No" "F"

"1000000000" "No" "F"

"1000000000" "No" "M"

"1000000000" "No" "M"

"1000000000" "No" "M"

"1000000000" "No" "M"

"1000000000" "No" "M"

"1000000000" "No" "M"

"1000000000" "No" "M"

"1000000000" "No" "M"

"1000000000" "No" "M"

"1000001000" "No" "M"

"1000000000" "No" "M"

"1000000000" "No" "M"

"1000000000" "No" "M"

"1000000000" "No" "M"

"1000000000" "No" "M"

"1000000000" "No" "M"

"1000000000" "No" "M"

"1000000000" "No" "M"

"1000000000" "No" "F"

"1000000000" "No" "M"

"1000000000" "No" "F"

"1000000000" "No" "M"

"1000000000" "No" "M"

"1000000000" "No" "M"

"1000000000" "No" "F"

"1100000000" "No" "M"

"1000000000" "No" "F"

"1000000000" "No" "M"

"1000000000" "No" "M"

"1000000000" "No" "F"

"1000000000" "No" "M"

"1000000000" "No" "M"

"1000000000" "No" "F"

"1000000000" "No" "F"

"1000000000" "No" "M"

"1000000000" "No" "M"

"1000000000" "No" "M"

"1000000000" "No" "F"

"1000000000" "No" "M"

"1000000000" "No" "M"

"1000000000" "No" "M"

"1000000000" "No" "M"

"1000000000" "No" "M"

"1000000000" "No" "M"

"1100000000" "No" "M"

"1000000000" "No" "M"

"1000000000" "No" "M"

"1000000000" "No" "F"

"1000000000" "No" "F"

"1000000000" "No" "M"

"1000000000" "No" "M"

"1000000000" "No" "F"

"1000000000" "No" "F"

"1000000000" "No" "M"

"1000000000" "No" "M"

"1000000000" "No" "M"

"1000000000" "No" "M"

"1000000000" "No" "M"

"1000000000" "No" "M"

"1000000000" "No" "M"

"1000000000" "No" "F"

"1000000000" "No" "F"

"1000000000" "No" "M"

"1000000000" "No" "M"

"1000000000" "No" "F"

"1100000000" "No" "M"

"1000000000" "No" "F"

"1000000000" "No" "M"

"1000000000" "No" "M"

"1000000000" "No" "M"

"1000000000" "No" "F"

"1000000000" "No" "F"

"1000000000" "No" "M"

"1000000000" "No" "M"

"1000000000" "No" "F"

"1100000000" "No" "M"

"1000000000" "No" "F"

"1000000000" "No" "M"

"1000000000" "No" "M"

"1000000000" "No" "M"

"1000000000" "No" "F"

"1000000000" "No" "M"

"1000000000" "No" "F"

"1000000000" "No" "F"

"1000000000" "No" "F"

"1000000000" "No" "M"

"1000000000" "No" "M"

"1000000000" "No" "M"

"1000000000" "No" "M"

"1000000000" "No" "M"

"1000000000" "No" "F"

"1000000000" "No" "M"

"1000000000" "No" "M"

"1000000000" "No" "M"

"1000000000" "No" "F"

"1000000000" "No" "M"

"1000000000" "No" "M"

"1000000000" "No" "M"

"1000000000" "No" "F"

"1000000000" "No" "M"

"1000000000" "No" "M"

"1000000000" "No" "F"

"1000000000" "No" "F"

"0000100000" "No" "M"

"0101000000" "No" "U"

"1000000000" "No" "M"

"0001000000" "No" "M"

"0100000000" "No" "M"

"1000000000" "No" "M"

"1000000000" "No" "M"

"1000000000" "No" "F"

"1000000000" "No" "M"

"1000000000" "No" "M"

"1000000000" "No" "M"

"1000000000" "No" "F"

"1000000000" "No" "M"

"1000000000" "No" "M"

"1000000000" "No" "F"

"1000000000" "No" "M"

"1000000000" "No" "M"

"1000000000" "No" "M"

"1000000000" "No" "M"

"1000000000" "No" "M"

"1000000000" "No" "M"

"1000000000" "No" "M"

"1000000000" "No" "M"

"1000000000" "No" "M"

"1000000000" "No" "F"

"1000000000" "No" "F"

"1000000000" "No" "M"

"1000000000" "No" "F"

"1000000000" "No" "F"

"1000000000" "No" "F"

"1000000000" "No" "F"

"1000000000" "No" "M"

"1000000000" "No" "M"

"1000000000" "No" "M"

"1000000000" "No" "M"

"1000000000" "No" "M"

"1000000000" "No" "M"

"1000000000" "No" "M"

"1010000000" "No" "M"

"1000000000" "No" "F"

"1000000000" "No" "M"

"1001000000" "No" "M"

"1000000000" "No" "M"

"1000000000" "No" "M"

"1000000000" "No" "M"

"1000000000" "No" "M"

"1000000000" "No" "F"

"1000000000" "No" "M"

"1000000000" "No" "F"

"1000000000" "No" "M"

"1000000000" "No" "F"

"1000000000" "No" "M"

"1000000000" "No" "M"

"1000000000" "No" "M"

"1000000000" "No" "F"

"1000000000" "No" "M"

"1000000000" "No" "M"

"1000000000" "No" "M"

"1100000000" "No" "M"

"1000000000" "No" "M"

"1000000000" "No" "M"

"1000000000" "No" "M"

"1000000000" "No" "M"

"1000000000" "No" "F"

"1000000000" "No" "F"

"1000000000" "No" "M"

"1000000000" "No" "M"

"1000000000" "No" "M"

"1000000000" "No" "F"

"1000000000" "No" "M"

"1000000000" "No" "F"

"1000000000" "No" "F"

"1000000000" "No" "M"

"1000000000" "No" "F"

"1000000000" "No" "M"

"1000000000" "No" "M"

"1000000000" "No" "F"

"1100000000" "No" "M"

"1000000000" "No" "M"

"1000000000" "No" "M"

"1000000000" "No" "M"

"1000000000" "No" "F"

"1000000000" "No" "F"

"1000000000" "No" "F"

"1100000000" "No" "M"

"1000000000" "No" "F"

"1000000000" "No" "M"

"1100000000" "No" "M"

"1000000000" "No" "M"

"1000000000" "No" "M"

"1000000000" "No" "M"

"1000000000" "No" "M"

"1000000000" "No" "F"

"1000000000" "No" "F"

"1000000000" "No" "M"

"1000000000" "No" "M"

"1001000000" "No" "F"

"1000000000" "No" "M"

"1000000000" "No" "M"

"1000000000" "No" "M"

"1000000000" "No" "F"

"1000000000" "No" "M"

"1000000000" "No" "M"

"1000000000" "No" "M"

"1000000000" "No" "F"

"1000000000" "No" "M"

"1000000000" "No" "M"

"1000000000" "No" "M"

"1000000000" "No" "M"

"1000000000" "No" "M"

"1000000000" "No" "F"

"1000000000" "No" "M"

"1000000000" "No" "M"

"1000000000" "No" "M"

"1000000000" "No" "M"

"1000000000" "No" "F"

"1000000000" "No" "M"

"1000000000" "No" "M"

"1000000000" "No" "M"

"1000000000" "No" "M"

"1000000000" "No" "F"

"1000000000" "No" "M"

"1000000000" "No" "M"

"1000000000" "No" "M"

"1000000000" "No" "M"

"1000000000" "No" "F"

"1000000000" "No" "M"

"1000000000" "No" "M"

"1000000000" "No" "F"

"1000000000" "No" "M"

"1000000000" "No" "F"

"1000000000" "No" "F"

"1100000000" "No" "M"

"1000000000" "No" "F"

"1000000000" "No" "F"

"1000000000" "No" "M"

"1000000000" "No" "F"

"1000000000" "No" "M"

"1000010000" "No" "M"

"1000000000" "No" "M"

"1000000000" "No" "M"

"1000000000" "No" "F"

"1000000000" "No" "M"

"1000000000" "No" "M"

"1000000000" "No" "M"

"1100000000" "No" "M"

"1000000000" "No" "M"

"1000000000" "No" "F"

"1000010000" "No" "F"

"1100000000" "No" "M"

"1000000000" "No" "F"

"1000000000" "No" "M"

"1100000000" "No" "M"

"1100000000" "No" "M"

"1000000000" "No" "M"

"1000000000" "No" "F"

"1000000000" "No" "F"

"1000000000" "No" "F"

"1000000000" "No" "M"

"1000100000" "No" "M"

"1000000000" "No" "F"

"1000000000" "No" "M"

"1000000000" "No" "M"

"1000000000" "No" "M"

"1000000000" "No" "F"

"1000000000" "No" "M"

"1000000000" "No" "M"

"1000000000" "No" "M"

"1100000000" "No" "M"

"1000000000" "No" "M"

"1000000000" "No" "M"

"1100000000" "No" "M"

"1000000000" "No" "M"

"1000000000" "No" "M"

"1000000000" "No" "F"

"1100000000" "No" "M"

"1000000000" "No" "F"

"1000000000" "No" "F"

"1000000000" "No" "F"

"1000000000" "No" "M"

"1000000000" "No" "M"

"1000000000" "No" "F"

"1000000000" "No" "F"

"1000000000" "No" "M"

"1000000000" "No" "F"

"1000000000" "No" "F"

"1000000000" "No" "F"

"1000000000" "No" "F"

"1000000000" "No" "M"

"1000000000" "No" "M"

"1000000000" "No" "M"

"1000000000" "No" "M"

"1000000000" "No" "F"

"1100000000" "No" "M"

"1000000000" "No" "F"

"1000000000" "No" "M"

"1000000000" "No" "F"

"1100000000" "No" "M"

"1000000000" "No" "M"

"1000000000" "No" "F"

"1000000000" "No" "M"

"1000000000" "No" "M"

"1000000000" "No" "F"

"1000000000" "No" "F"

"1000000000" "No" "M"

"1000000000" "No" "F"

"1000000000" "No" "M"

"1000000000" "No" "M"

"1000000000" "No" "M"

"1100000000" "No" "M"

"1000000000" "No" "M"

"1000010000" "No" "M"

"1000000000" "No" "F"

"1000000000" "No" "F"

"1100000000" "No" "F"

"1000100000" "No" "M"

"1000000000" "No" "F"

"1000000000" "No" "F"

"1000000000" "No" "M"

"1000000000" "No" "F"

"1000000000" "No" "F"

"1000000000" "No" "M"

"1000000000" "No" "M"

"1000000000" "No" "M"

"1000000000" "No" "F"

"1100000000" "No" "F"

"1000000000" "No" "M"

"1000000000" "No" "M"

"1000000000" "No" "M"

"1000010000" "No" "M"

"1000000000" "No" "U"

"1100000000" "No" "F"

"1000000000" "No" "M"

"1000000000" "No" "F"

"1010000000" "No" "U"

"1000000000" "No" "F"

"1000000000" "No" "F"

"1000000000" "No" "F"

"1000000000" "No" "F"

"1000000000" "No" "F"

"1000000000" "No" "M"

"1100000000" "No" "F"

"1000000000" "No" "M"

"1000000000" "No" "F"

"1000000000" "No" "M"

"1000000000" "No" "M"

"1000000000" "No" "F"

"1000000000" "No" "M"

"1000000000" "No" "F"

"1000000000" "No" "M"

"1000000000" "No" "M"

"1000000000" "No" "M"

"1000001000" "No" "M"

"1000000000" "No" "F"

"1000000100" "No" "M"

"1000000000" "No" "M"

"1000000000" "No" "F"

"1000000000" "No" "M"

"1000000000" "No" "M"

"1000000000" "No" "M"

"1000000000" "No" "F"

"1000000000" "No" "M"

"1000000000" "No" "F"

"1000000000" "No" "F"

"1000000000" "No" "F"

"1000000000" "No" "M"

"1000000000" "No" "F"

"1000000000" "No" "F"

"1000000000" "No" "F"

"1000000000" "No" "F"

"1000000000" "No" "F"

"1000000000" "No" "M"

"1000000000" "No" "M"

"1000000000" "No" "F"

"1000000000" "No" "F"

"1000000000" "No" "M"

"1000000000" "No" "M"

"1000000000" "No" "F"

"1000000000" "No" "M"

"1000000000" "No" "F"

"1000000000" "No" "M"

"1000000000" "No" "M"

"1000000000" "No" "F"

"1000000000" "No" "F"

"1000000000" "No" "F"

"1000000000" "No" "M"

"1000000000" "No" "M"

"1000000000" "No" "M"

"1000000000" "No" "F"

"1000000000" "No" "M"

"1000000000" "No" "M"

"1000000000" "No" "M"

"1000000000" "No" "F"

"1000000000" "No" "F"

"1000000000" "No" "M"

"1000000000" "No" "F"

"1000000000" "No" "F"

"1000000000" "No" "M"

"1000000000" "No" "M"

"1000000000" "No" "M"

"1000000000" "No" "F"

"1000000000" "No" "F"

"1000000000" "No" "M"

"1000000000" "No" "M"

"1001000000" "No" "F"

"1000000000" "No" "F"

"1000000000" "No" "F"

"1000000000" "No" "F"

"1000000000" "No" "F"

"1000000000" "No" "M"

"1000000000" "No" "M"

"1000000000" "No" "M"

"1000000000" "No" "M"

"1000000000" "No" "M"

"1000000000" "No" "F"

"1000000000" "No" "M"

"1000000000" "No" "M"

"1000000000" "No" "F"

"1000000000" "No" "M"

"1000000000" "No" "M"

"1000000000" "No" "M"

"1000000000" "No" "F"

"1000000000" "No" "M"

"1000000000" "No" "M"

"1000000000" "No" "F"

"1000000000" "No" "M"

"1000000000" "No" "F"

"1000000000" "No" "F"

"1000000000" "No" "F"

"1000000000" "No" "M"

"1000000000" "No" "F"

"1000000000" "No" "F"

"1000000000" "No" "F"

"1000000000" "No" "M"

"1000000000" "No" "M"

"1000000000" "No" "F"

"1000000000" "No" "F"

"1000000000" "No" "F"

"1000000000" "No" "M"

"1000000000" "No" "M"

"1000000000" "No" "M"

"1000000000" "No" "F"

"1000000000" "No" "M"

"1000000000" "No" "M"

"1100000000" "No" "M"

"1000000000" "No" "M"

"1000000000" "No" "F"

"1000000000" "No" "F"

"1000000000" "No" "F"

"1000000000" "No" "F"

"1000000000" "No" "F"

"1000000000" "No" "M"

"1000000000" "No" "F"

"1000000000" "No" "M"

"1000000000" "No" "M"

"1000000000" "No" "F"

"1000000000" "No" "F"

"1000000000" "No" "M"

"1000000000" "No" "M"

"1000000000" "No" "F"

"1000000000" "No" "F"

"1000000000" "No" "M"

"1000000000" "No" "F"

"1000000000" "No" "M"

"1000000000" "No" "M"

"1000000000" "No" "F"

"1000000000" "No" "F"

"1000000000" "No" "F"

"1000000000" "No" "F"

"1000000000" "No" "F"

"1000000000" "No" "F"

"1000000000" "No" "M"

"1000010000" "No" "M"

"1000000000" "No" "M"

"1000000000" "No" "M"

"1000000000" "No" "F"

"1000000000" "No" "M"

"1000000000" "No" "F"

"1000000000" "No" "M"

"1000000000" "No" "F"

"1000001000" "No" "M"

"1000000000" "No" "F"

"1000000000" "No" "F"

"1000000000" "No" "F"

"1000000000" "No" "M"

"1000000000" "No" "F"

"1000001000" "No" "M"

"1000000000" "No" "M"

"1010000000" "No" "F"

"1000000000" "No" "M"

"1000000000" "No" "M"

"1000000000" "No" "M"

"1000000000" "No" "M"

"1000000000" "No" "M"

"1000000000" "No" "F"

"1000000000" "No" "F"

"1000000000" "No" "F"

"1000000000" "No" "M"

"1000000000" "No" "F"

"1000000000" "No" "F"

"1000000000" "No" "M"

"1000000000" "No" "M"

"1000000000" "No" "M"

"1000000000" "No" "M"

"1001000000" "No" "M"

"1100000000" "No" "F"

"1000000000" "No" "F"

"1000000000" "No" "M"

"1000000000" "No" "F"

"1000000000" "No" "M"

"1000000000" "No" "F"

"1000000000" "No" "M"

"1000000000" "No" "F"

"1000000000" "No" "F"

"1000000000" "No" "M"

"1000000000" "No" "M"

"1000000000" "No" "F"

"1000000000" "No" "F"

"1000000000" "No" "M"

"1000000000" "No" "F"

"1000000000" "No" "M"

"1000000000" "No" "F"

"1000000000" "No" "M"

"1000000000" "No" "M"

"1000000000" "No" "M"

"1000000000" "No" "M"

"1000000000" "No" "F"

"1000000000" "No" "F"

"1000000000" "No" "M"

"1000000000" "No" "M"

"1000000000" "No" "M"

"1000000000" "No" "F"

"1000000000" "No" "F"

"1000000000" "No" "M"

"1000000000" "No" "F"

"1000000000" "No" "F"

"1000000000" "No" "M"

"1000000000" "No" "F"

"1000000000" "No" "F"

"1000000000" "No" "F"

"1000000000" "No" "F"

"1000000000" "No" "F"

"1000000000" "No" "M"

"1000000000" "No" "F"

"1000000000" "No" "F"

"1000000000" "No" "F"

"1000000000" "No" "F"

"1000000000" "No" "M"

"1000000000" "No" "F"

"1000000000" "No" "F"

"1000000000" "No" "M"

"1000000000" "No" "F"

"1000000000" "No" "M"

"1000000000" "No" "F"

"1000000000" "No" "F"

"1000000000" "No" "M"

"1000000000" "No" "M"

"1000000000" "No" "M"

"1000000000" "No" "M"

"1000000000" "No" "F"

"1000000000" "No" "M"

"1000000000" "No" "F"

"1000000000" "No" "M"

"1000000000" "No" "M"

"1000000000" "No" "F"

"1000000000" "No" "F"

"1000000000" "No" "M"

"1000000000" "No" "F"

"1000000000" "No" "F"

"1000000000" "No" "M"

"1100000000" "No" "M"

"1000000000" "No" "M"

"1000000000" "No" "M"

"1000000000" "No" "F"

"1000000000" "No" "M"

"1000000000" "No" "M"

"1000000000" "No" "F"

"1000000000" "No" "M"

"1000000000" "No" "M"

"1000000000" "No" "M"

"1000000000" "No" "M"

"1000000000" "No" "M"

"1000000000" "No" "F"

"1000000000" "No" "M"

"1000000000" "No" "F"

"1000000000" "No" "M"

"1000000000" "No" "F"

"1000000000" "No" "M"

"1000000000" "No" "F"

"1000000000" "No" "M"

"1010000000" "No" "M"

"1000000000" "No" "M"

"1000000000" "No" "M"

"1001100000" "No" "M"

"1000000000" "No" "F"

"1000000000" "No" "F"

"1000010000" "No" "F"

"1000000000" "No" "F"

"1000000000" "No" "M"

"1000000000" "No" "M"

"1000000000" "No" "M"

"1000000000" "No" "M"

"1000000000" "No" "M"

"1000000000" "No" "M"

"1000000000" "No" "M"

"1000000000" "No" "F"

"1001100000" "No" "M"

"1000000000" "No" "M"

"1000000000" "No" "M"

"1000000000" "No" "M"

"1000000000" "No" "F"

"1000000000" "No" "F"

"1000000000" "No" "F"

"1000000000" "No" "M"

"1000000000" "No" "M"

"1000000000" "No" "M"

"1000000000" "No" "M"

"1000000000" "No" "F"

"1000000000" "No" "M"

"1000000000" "No" "F"

"1000000000" "No" "F"

"1000000000" "No" "M"

"1000000000" "No" "M"

"1000000000" "No" "F"

"1000000000" "No" "M"

"1000000000" "No" "M"

"1000000000" "No" "M"

"1000000000" "No" "M"

"1000010000" "No" "F"

"1000000000" "No" "F"

"1000000000" "No" "F"

"1000000000" "No" "F"

"1000000000" "No" "M"

"1000000000" "No" "M"

"1000000000" "No" "M"

"1000000000" "No" "M"

"1000000000" "No" "F"

"1000000000" "No" "M"

"1000000000" "No" "M"

"1000000000" "No" "M"

"1000000000" "No" "M"

"1000010000" "No" "F"

"1000000000" "No" "F"

"1000000000" "No" "M"

"1000000000" "No" "F"

"1000000000" "No" "F"

"1000000000" "No" "M"

"1000000000" "No" "F"

"1000000000" "No" "M"

"1000000000" "No" "M"

"1000000000" "No" "F"

"1000000000" "No" "F"

"1000000000" "No" "F"

"1000000000" "No" "F"

"1000000000" "No" "M"

"1000000000" "No" "M"

"1000000000" "No" "F"

"1000000000" "No" "F"

"1000000000" "No" "F"

"1000000000" "No" "F"

"1000000000" "No" "F"

"1000000000" "No" "F"

"1000000000" "No" "F"

"1000000000" "No" "M"

"1000000000" "No" "F"

"1000000000" "No" "F"

"1000000000" "No" "M"

"1000000000" "No" "F"

"1000000000" "No" "F"

"1000000000" "No" "M"

"1000000000" "No" "F"

"1000000000" "No" "F"

"1000000000" "No" "F"

"1000000000" "No" "M"

"1010000000" "No" "M"

"1000000000" "No" "F"

"1000000000" "No" "M"

"1000000000" "No" "F"

"1000000000" "No" "M"

"1000000000" "No" "F"

"1000000000" "No" "F"

"1000000000" "No" "M"

"1000000000" "No" "M"

"1000000000" "No" "M"

"1000000000" "No" "F"

"1000000000" "No" "F"

"1000000000" "No" "F"

"1000000000" "No" "M"

"1000000000" "No" "M"

"1000000000" "No" "F"

"1000000000" "No" "F"

"1000000000" "No" "M"

"1001000000" "No" "M"

"1000000000" "No" "M"

"1000000000" "No" "M"

"1000000000" "No" "M"

"1000000000" "No" "F"

"1000000000" "No" "M"

"1000000000" "No" "F"

"1000000000" "No" "M"

"1000000000" "No" "F"

"1000000000" "No" "F"

"1000000000" "No" "M"

"1000000000" "No" "F"

"1000000000" "No" "M"

"1000000000" "No" "F"

"1000000000" "No" "M"

"1000000000" "No" "F"

"1000000000" "No" "M"

"1000000000" "No" "F"

"1000000000" "No" "F"

"1000000000" "No" "F"

"1000000000" "No" "M"

"1000000000" "No" "F"

"1000000000" "No" "F"

"1000000000" "No" "F"

"1000000000" "No" "M"

"1000000000" "No" "F"

"1000100000" "No" "M"

"1000000000" "No" "M"

"1000000000" "No" "F"

"1000000000" "No" "M"

"1000000000" "No" "F"

"1000000000" "No" "F"

"1000000000" "No" "M"

"1000000000" "No" "F"

"1000000000" "No" "M"

"1000000000" "No" "M"

"1000000000" "No" "M"

"1000000000" "No" "M"

"1000000000" "No" "F"

"1000000000" "No" "F"

"1000000000" "No" "M"

"1000000000" "No" "F"

"1000000000" "No" "F"

"1000000000" "No" "M"

"1000000000" "No" "M"

"1000000000" "No" "F"

"1000000000" "No" "M"

"1000000000" "No" "M"

"1000000000" "No" "F"

"1000000000" "No" "M"

"1000000000" "No" "M"

"1000000000" "No" "F"

"1000000000" "No" "F"

"1000000000" "No" "M"

"1000000000" "No" "F"

"1000000000" "No" "F"

"1000100000" "No" "M"

"1000000000" "No" "M"

"1100000000" "No" "M"

"1000000000" "No" "F"

"1000000000" "No" "M"

"1000000000" "No" "F"

"1000000000" "No" "F"

"1000000000" "No" "M"

"1000000000" "No" "F"

"1000000000" "No" "M"

"1000000000" "No" "M"

"1000000000" "No" "M"

"1000000000" "No" "F"

"1000000000" "No" "F"

"1010000000" "No" "F"

"1000000000" "No" "M"

"1000000000" "No" "F"

"1000000000" "No" "M"

"1000000000" "No" "F"

"1000000000" "No" "M"

"1000000000" "No" "M"

"1000000000" "No" "M"

"1000000000" "No" "F"

"1000000000" "No" "M"

"1000000000" "No" "F"

"1000000000" "No" "M"

"1000000000" "No" "F"

"1000000000" "No" "M"

"1000000000" "No" "F"

"1000000000" "No" "M"

"1000000000" "No" "M"

"1000000000" "No" "M"

"1000000000" "No" "F"

"1000000000" "No" "M"

"1000000000" "No" "F"

"1000000000" "No" "F"

"1000000000" "No" "F"

"1000000000" "No" "M"

"1000000000" "No" "F"

"1000000000" "No" "F"

"1000000000" "No" "F"

"1000000100" "No" "M"

"1000000000" "No" "M"

"1000000000" "No" "M"

"1000000000" "No" "F"

"1000000000" "No" "F"

"1000001000" "No" "M"

"1000000000" "No" "F"

"1000000000" "No" "M"

"1000000000" "No" "M"

"1000000000" "No" "F"

"1000000000" "No" "F"

"1000000000" "No" "M"

"1000100000" "No" "M"

"1000000000" "No" "F"

"1000000000" "No" "F"

"1000000000" "No" "M"

"1000000000" "No" "M"

"1000000000" "No" "M"

"1000000000" "No" "F"

"1000000000" "No" "F"

"1000000000" "No" "M"

"1000000000" "No" "F"

"1000000000" "No" "M"

"1000000000" "No" "F"

"1100000000" "No" "M"

"1000000000" "No" "F"

"1100000000" "No" "M"

"1000000000" "No" "F"

"1000000000" "No" "F"

"1000000000" "No" "M"

"1000000000" "No" "M"

"1000000000" "No" "M"

"1000000000" "No" "M"

"1000000000" "No" "M"

"1000000000" "No" "M"

"1000000000" "No" "M"

"1000000000" "No" "F"

"1000000000" "No" "M"

"1000000000" "No" "F"

"1000000000" "No" "M"

"1000000000" "No" "M"

"1000000000" "No" "M"

"1000000000" "No" "M"

"1000000000" "No" "M"

"1000000000" "No" "F"

"1000000000" "No" "F"

"1000000000" "No" "F"

"1000000000" "No" "M"

"1000000000" "No" "M"

"1000000000" "No" "F"

"1000000000" "No" "F"

"1000000000" "No" "M"

"1000000000" "No" "F"

"1000000000" "No" "F"

"1000000000" "No" "M"

"1000000000" "No" "F"

"1000000000" "No" "F"

"1000000000" "No" "M"

"1000000000" "No" "F"

"1000000000" "No" "M"

"1000000000" "No" "F"

"1000000000" "No" "M"

"1000000000" "No" "M"

"1000000000" "No" "F"

"1100000000" "No" "M"

"1000000000" "No" "F"

"1000000000" "No" "M"

"1000000000" "No" "M"

"1000000000" "No" "F"

"1000000000" "No" "M"

"1000000000" "No" "M"

"1000000000" "No" "F"

"1000000000" "No" "F"

"1000000000" "No" "F"

"1000000000" "No" "M"

"1010000000" "No" "M"

"1000000000" "No" "M"

"1000000000" "No" "M"

"1000000000" "No" "M"

"1000000000" "No" "F"

"1000000000" "No" "F"

"1000000000" "No" "M"

"1000000000" "No" "F"

"1000000000" "No" "M"

"1000000000" "No" "M"

"1000000000" "No" "F"

"1000000000" "No" "F"

"1000000000" "No" "M"

"1000000000" "No" "F"

"1000000000" "No" "F"

"1000000000" "No" "F"

"1000000000" "No" "F"

"1000000000" "No" "M"

"1000000000" "No" "F"

"1000000000" "No" "M"

"1000000000" "No" "M"

"1000000000" "No" "M"

"1000000000" "No" "M"

"1000000000" "No" "F"

"1000000000" "No" "F"

"1000000000" "No" "M"

"1000000000" "No" "M"

"1000000000" "No" "M"

"1000000000" "No" "M"

"1000000000" "No" "M"

"1000000000" "No" "M"

"1000000000" "No" "M"

"1000000000" "No" "F"

"1000000000" "No" "M"

"1000000000" "No" "F"

"1000000000" "No" "M"

"1000000000" "No" "F"

"1000000000" "No" "F"

"1000000000" "No" "F"

"1000000000" "No" "M"

"1000000000" "No" "F"

"1000000000" "No" "F"

"1000000000" "No" "F"

"1000000000" "No" "M"

"1000000000" "No" "F"

"1010000000" "No" "F"

"1000000000" "No" "M"

"1000000000" "No" "M"

"1000000000" "No" "F"

"1000000000" "No" "M"

"1000000000" "No" "M"

"1000000000" "No" "F"

"1000000000" "No" "M"

"1000000000" "No" "M"

"1000000000" "No" "M"

"1000000000" "No" "F"

"1000000000" "No" "M"

"1000000000" "No" "F"

"1000000000" "No" "M"

"1000000000" "No" "M"

"1000000000" "No" "F"

"1000000000" "No" "M"

"1000000000" "No" "M"

"1000000000" "No" "F"

"1000000000" "No" "F"

"1000000000" "No" "F"

"1000000000" "No" "F"

"1000000000" "No" "F"

"1011000000" "No" "M"

"1000000000" "No" "M"

"1000000000" "No" "F"

"1000000000" "No" "M"

"1000000000" "No" "F"

"1000000000" "No" "F"

"1000000000" "No" "F"

"1000000100" "No" "M"

"1000000000" "No" "M"

"1100000000" "No" "M"

"1000000000" "No" "M"

"1000000000" "No" "M"

"1000000000" "No" "F"

"1000000000" "No" "F"

"1000000000" "No" "F"

"1000000000" "No" "M"

"1000001000" "No" "F"

"1000000000" "No" "F"

"1000000000" "No" "M"

"1000000000" "No" "M"

"1000000000" "No" "F"

"1000000000" "No" "F"

"1000000000" "No" "M"

"1000000000" "No" "M"

"1000000000" "No" "F"

"1000000000" "No" "M"

"1000000000" "No" "F"

"1000000000" "No" "F"

"1000000000" "No" "M"

"1000000000" "No" "F"

"1000000000" "No" "M"

"1001000000" "No" "M"

"1000000000" "No" "F"

"1000000000" "No" "M"

"1000000000" "No" "M"

"1000000000" "No" "F"

"1000000000" "No" "F"

"1000000000" "No" "M"

"1000000000" "No" "F"

"1000000000" "No" "F"

"1000000000" "No" "M"

"1100000000" "No" "F"

"1000000000" "No" "M"

"1000000000" "No" "M"

"1000000000" "No" "F"

"1000000000" "No" "F"

"1000000000" "No" "M"

"1000000000" "No" "M"

"1000000000" "No" "F"

"1000000000" "No" "M"

"1000000000" "No" "F"

"1000000000" "No" "F"

"1000000000" "No" "M"

"1000000000" "No" "F"

"1000000000" "No" "M"

"1000000000" "No" "M"

"1000000000" "No" "F"

"1000000000" "No" "F"

"1000000000" "No" "M"

"1000000000" "No" "M"

"1000000000" "No" "F"

"1000000000" "No" "M"

"1000000000" "No" "F"

"1000000000" "No" "M"

"1000001000" "No" "F"

"1000000000" "No" "F"

"1000000000" "No" "F"

"1000000000" "No" "M"

"1000000000" "No" "M"

"1000000000" "No" "F"

"1000000000" "No" "M"

"1000000000" "No" "F"

"1000000000" "No" "M"

"1000000000" "No" "M"

"1000000000" "No" "M"

"1000000000" "No" "F"

"1000000000" "No" "M"

"1000000000" "No" "M"

"1000000000" "No" "M"

"1000000000" "No" "F"

"1000000000" "No" "M"

"1000000000" "No" "F"

"1000000000" "No" "F"

"1000000000" "No" "F"

"1000000000" "No" "M"

"1000000000" "No" "F"

"1000000000" "No" "F"

"1000000000" "No" "M"

"1000000000" "No" "F"

"1000000000" "No" "F"

"1000000000" "No" "M"

"1000000000" "No" "F"

"1000000000" "No" "M"

"1000000000" "No" "F"

"1000000000" "No" "M"

"1000000000" "No" "M"

"1000000000" "No" "F"

"1000000000" "No" "F"

"1000000000" "No" "M"

"1000000000" "No" "F"

"1000000000" "No" "M"

"1000000000" "No" "F"

"1000000000" "No" "M"

"1000000000" "No" "F"

"1000000000" "No" "M"

"1000000000" "No" "M"

"1000000000" "No" "M"

"1000000000" "No" "M"

"1000000000" "No" "F"

"1000000000" "No" "F"

"1000000000" "No" "M"

"1000000000" "No" "M"

"1000000000" "No" "F"

"1000000000" "No" "M"

"1000000000" "No" "F"

"1000000000" "No" "F"

"1000000000" "No" "F"

"1000000000" "No" "M"

"1000000000" "No" "M"

"1000000000" "No" "M"

"1000000000" "No" "M"

"1000000000" "No" "F"

"1000000000" "No" "M"

"1000000000" "No" "M"

"1000000000" "No" "M"

"1010000000" "No" "F"

"1000000000" "No" "M"

"1000000000" "No" "F"

"1000000000" "No" "F"

"1000000000" "No" "M"

"1000000000" "No" "F"

"1000000000" "No" "F"

"1000000000" "No" "M"

"1000000000" "No" "M"

"1000000000" "No" "F"

"1000000000" "No" "F"

"1000000000" "No" "M"

"1000000000" "No" "F"

"1000000000" "No" "M"

"1000000000" "No" "F"

"1000000000" "No" "M"

"1000000000" "No" "F"

"1000000000" "No" "F"

"1000000000" "No" "M"

"1000000000" "No" "F"

"1000000000" "No" "F"

"1000000000" "No" "M"

"1000000100" "No" "M"

"1000000000" "No" "F"

"1000000000" "No" "M"

"1000000000" "No" "M"

"1000000000" "No" "M"

"1000000000" "No" "F"

"1000000000" "No" "M"

"1000000000" "No" "F"

"1000000000" "No" "F"

"1000000000" "No" "M"

"1000000000" "No" "F"

"1000000000" "No" "F"

"1000000000" "No" "M"

"1000000000" "No" "M"

"1000000000" "No" "M"

"1000000000" "No" "F"

"1000000000" "No" "M"

"1000000000" "No" "F"

"1000000000" "No" "M"

"1000000000" "No" "F"

"1000000000" "No" "M"

"1000000000" "No" "F"

"1000000000" "No" "M"

"1000000000" "No" "F"

"1000000000" "No" "M"

"1000000000" "No" "M"

"1000000000" "No" "M"

"1000000000" "No" "M"

"1000000000" "No" "F"

"1000000000" "No" "M"

"1000000000" "No" "F"

"1000000000" "No" "F"

"1000000000" "No" "M"

"1000000000" "No" "F"

"1000000000" "No" "F"

"1000000000" "No" "F"

"1000000000" "No" "M"

"1000000000" "No" "M"

"1000000000" "No" "M"

"1000000000" "No" "M"

"1000000000" "No" "F"

"1100000000" "No" "M"

"1000000000" "No" "F"

"1000000000" "No" "F"

"1000000000" "No" "F"

"1000000000" "No" "M"

"1000000000" "No" "F"

"1000000000" "No" "M"

"1000000000" "No" "M"

"1000000000" "No" "M"

"1000000000" "No" "M"

"1000000000" "No" "F"

"1000000000" "No" "F"

"1000000100" "No" "M"

"1000000000" "No" "F"

"1000000000" "No" "M"

"1000000000" "No" "F"

"1000000000" "No" "M"

"1000000000" "No" "M"

"1000000000" "No" "M"

"1000000000" "No" "F"

"1000000000" "No" "F"

"1000000000" "No" "M"

"1000000000" "No" "F"

"1001000000" "No" "M"

"1000000000" "No" "F"

"1000000000" "No" "M"

"1000000000" "No" "M"

"1000000000" "No" "M"

"1000000000" "No" "M"

"1100000000" "No" "M"

"1000000000" "No" "F"

"1000000000" "No" "F"

"1000000000" "No" "F"

"1000000000" "No" "F"

"1000000000" "No" "M"

"1000000000" "No" "F"

"1000000000" "No" "F"

"1000000000" "No" "M"

"1000000000" "No" "F"

"1000000000" "No" "M"

"1000000000" "No" "F"

"1000000000" "No" "M"

"1100000000" "No" "M"

"1000000000" "No" "M"

"1000000000" "No" "M"

"1100000000" "No" "F"

"1000000000" "No" "M"

"1000000000" "No" "F"

"1000000000" "No" "F"

"1000000000" "No" "M"

"1000000000" "No" "F"

"1000000000" "No" "F"

"1000000000" "No" "F"

"1100000000" "No" "F"

"1000000000" "No" "F"

"1000000000" "No" "F"

"1000000000" "No" "F"

"1000000000" "No" "M"

"1000000000" "No" "M"

"1000000000" "No" "F"

"1000000000" "No" "M"

"1000011000" "No" "M"

"1000000000" "No" "F"

"1000000000" "No" "F"

"1000000000" "No" "F"

"1000000000" "No" "F"

"1000000000" "No" "F"

"1100000000" "No" "M"

"1010000000" "No" "F"

"1000000000" "No" "F"

"1000000000" "No" "F"

"1000000000" "No" "F"

"1100000000" "No" "M"

"1000000000" "No" "M"

"1000000000" "No" "F"

"1000000000" "No" "M"

"1000000000" "No" "M"

"1000000000" "No" "M"

"1000000000" "No" "M"

"1000000000" "No" "F"

"1000000000" "No" "M"

"1000000000" "No" "M"

"1000000000" "No" "M"

"1000000000" "No" "F"

"1000000000" "No" "F"

"1000000000" "No" "M"

"1000000000" "No" "F"

"1000000000" "No" "F"

"1000000000" "No" "M"

"1000000000" "No" "F"

"1000000000" "No" "F"

"1000000000" "No" "M"

"1000000000" "No" "F"

"1000000000" "No" "M"

"1000000000" "No" "F"

"1000000000" "No" "M"

"1000000000" "No" "M"

"1000000000" "No" "F"

"1000000000" "No" "M"

"1000000000" "No" "M"

"1000000000" "No" "M"

"1000000000" "No" "M"

"1000000000" "No" "F"

"1000000000" "No" "M"

"1000000000" "No" "M"

"1000000000" "No" "F"

"1000000000" "No" "M"

"1000000000" "No" "M"

"1000000000" "No" "M"

"1000000000" "No" "M"

"1000000000" "No" "M"

"1000000000" "No" "M"

"1000000000" "No" "F"

"1010000000" "No" "M"

"1000000000" "No" "M"

"1000000000" "No" "M"

"1000000000" "No" "F"

"1000000000" "No" "M"

"1000000000" "No" "F"

"1000000000" "No" "F"

"1000000000" "No" "M"

"1000000000" "No" "M"

"1000000000" "No" "F"

"1000000000" "No" "M"

"1000000000" "No" "M"

"1000000000" "No" "M"

"1000000000" "No" "M"

"1000000000" "No" "F"

"1000000000" "No" "M"

"1001000000" "No" "M"

"1000000000" "No" "M"

"1011000000" "No" "M"

"1000000000" "No" "M"

"1000000000" "No" "F"

"1000000000" "No" "M"

"1000000000" "No" "M"

"1000000000" "No" "M"

"1000000000" "No" "F"

"1000000000" "No" "M"

"1000100000" "No" "M"

"1000000000" "No" "F"

"1000000000" "No" "F"

"1000000000" "No" "M"

"1000000000" "No" "F"

"1000000000" "No" "M"

"1000000000" "No" "F"

"1000000000" "No" "M"

"1000010000" "No" "M"

"1000000000" "No" "M"

"1000000000" "No" "F"

"1000000000" "No" "M"

"1000000000" "No" "F"

"1000000000" "No" "M"

"1000000000" "No" "M"

"1000000000" "No" "F"

"1000000000" "No" "F"

"1000000000" "No" "F"

"1000000000" "No" "F"

"1000000000" "No" "M"

"1000000000" "No" "M"

"1000000000" "No" "M"

"1000000000" "No" "F"

"1000000000" "No" "M"

"1000000000" "No" "F"

"1000000000" "No" "M"

"1000000000" "No" "F"

"1000000000" "No" "M"

"1000001000" "No" "M"

"1000000000" "No" "F"

"1000000000" "No" "M"

"1000000000" "No" "M"

"1000000000" "No" "F"

"1000000000" "No" "M"

"1000000000" "No" "M"

"1000000000" "No" "F"

"1000000000" "No" "M"

"1000000000" "No" "M"

"1000000000" "No" "M"

"1000000000" "No" "M"

"1000000000" "No" "F"

"1000000000" "No" "M"

"1000000000" "No" "M"

"1000000000" "No" "M"

"1000000000" "No" "F"

"1000000000" "No" "F"

"1000000000" "No" "M"

"1000000000" "No" "M"

"1000000000" "No" "F"

"1000000000" "No" "F"

"1000000000" "No" "F"

"1000011000" "No" "M"

"0000000010" "No" "M"

"0000000100" "No" "M"

"0100000000" "No" "M"

"0000010000" "No" "M"

"0100000000" "No" "F"

"0000000100" "No" "M"

"0000001000" "No" "M"

"0010000000" "No" "M"

"0000000100" "No" "M"

"0010100000" "No" "M"

"1000000000" "No" "M"

"0000100000" "No" "M"

"0000100000" "No" "F"

"0001000000" "No" "M"

"0000100000" "No" "M"

"0000100000" "No" "M"

"0000100000" "No" "M"

"0000100000" "No" "M"

"0000100000" "No" "F"

"0000100000" "No" "M"

"0000100000" "No" "M"

"0000100000" "No" "M"

"0000100000" "No" "M"

"0000100000" "No" "F"

"0000100000" "No" "M"

"0000110000" "No" "M"

"0000100000" "No" "M"

"0000100000" "No" "F"

"0000100000" "No" "M"

"0000100000" "No" "F"

"0000100000" "No" "M"

"0000100000" "No" "F"

"0000100000" "No" "M"

"0000100000" "No" "M"

"0000100000" "No" "F"

"0000100000" "No" "M"

"0000100000" "No" "M"

"0000100000" "No" "M"

"0000101000" "No" "M"

"0000100000" "No" "F"

"0000100000" "No" "F"

"0000100000" "No" "M"

"0000100000" "No" "M"

"0000100000" "No" "F"

"0000100000" "No" "M"

"0000100000" "No" "F"

"0000100000" "No" "M"

"0000100000" "No" "M"

"0000100000" "No" "F"

"0000100000" "No" "M"

"0000100000" "No" "M"

"0000100000" "No" "M"

"0010000000" "No" "F"

"0100000000" "No" "F"

"0010000000" "No" "M"

"0100000000" "No" "M"

"0010000000" "No" "U"

"0001000000" "No" "U"

"0100000000" "No" "U"

"0000100000" "No" "F"

"0000110100" "No" "M"

"0000100000" "No" "M"

"0000100000" "No" "M"

"0000100000" "No" "M"

"0000100000" "No" "M"

"0000100000" "No" "M"

"0000100000" "No" "M"

"0000100000" "No" "M"

"0000100000" "No" "M"

"0000100000" "No" "M"

"0000110000" "No" "M"

"0000100000" "No" "M"

"0000101000" "No" "M"

"0000100000" "No" "M"

"0000100000" "No" "M"

"0000100000" "No" "F"

"0000101000" "No" "M"

"0000100000" "No" "M"

"0000100000" "No" "M"

"0000110000" "No" "M"

"0000100000" "No" "M"

"0000100000" "No" "F"

"0000100000" "No" "M"

"0000100000" "No" "M"

"0000100000" "No" "M"

"0000100000" "No" "M"

"0000100000" "No" "M"

"0000100000" "No" "M"

"0000100000" "No" "M"

"0000100000" "No" "M"

"0000100000" "No" "M"

"0000100000" "No" "M"

"0000100000" "No" "M"

"0000100000" "No" "M"

"0000100000" "No" "M"

"0000100000" "No" "M"

"0000100000" "No" "M"

"0000100000" "No" "M"

"0000100000" "No" "F"

"0000100000" "No" "M"

"0000100000" "No" "M"

"0000100000" "No" "M"

"0000100000" "No" "M"

"0000100000" "No" "M"

"0000100000" "No" "M"

"0000100000" "No" "M"

"0000100000" "No" "M"

"0000100000" "No" "F"

"0000100000" "No" "M"

"0000100000" "No" "M"

"0000100000" "No" "F"

"0000100000" "No" "M"

"0000100000" "No" "M"

"0000100000" "No" "M"

"0000110000" "No" "M"

"0000100000" "No" "F"

"0000100000" "No" "M"

"0000100000" "No" "M"

"0000100000" "No" "F"

"0000100000" "No" "M"

"0000100000" "No" "M"

"0000100000" "No" "F"

"0000100000" "No" "F"

"0000100000" "No" "M"

"0000100000" "No" "M"

"0000100000" "No" "M"

"0000100000" "No" "F"

"0000101000" "No" "M"

"0000100000" "No" "F"

"0000100000" "No" "F"

"0000100000" "No" "M"

"0000100000" "No" "F"

"0000100000" "No" "M"

"0000110000" "No" "M"

"1000000000" "No" "M"

"1000000000" "No" "M"

"0100000000" "No" "U"

"0001000000" "No" "F"

"0001010000" "No" "M"

"0010000000" "No" "M"

"1000000000" "No" "M"

"0000000010" "No" "M"

"0000000001" "No" "M"

"0100000000" "No" "M"

"0000100000" "No" "M"

"0000100000" "No" "M"

"0000100000" "No" "F"

"0000100000" "No" "M"

"0000100000" "No" "F"

"0000100000" "No" "F"

"0000100000" "No" "M"

"0000100000" "No" "M"

"0000100000" "No" "F"

"0000100000" "No" "M"

"0000100000" "No" "F"

"0000100000" "No" "M"

"0000100000" "No" "M"

"0000100000" "No" "F"

"0000100000" "No" "M"

"0000100000" "No" "M"

"0000100001" "No" "M"

"0000100000" "No" "M"

"0000100000" "No" "M"

"0000100000" "No" "M"

"0000100000" "No" "F"

"0000100000" "No" "F"

"0000100000" "No" "F"

"0000110010" "No" "M"

"0000100000" "No" "M"

"1000000000" "No" "U"

"1000000000" "No" "F"

"1000000000" "No" "F"

"1000000000" "No" "M"

"1000000000" "No" "M"

"1000000000" "No" "M"

"1000000000" "No" "M"

"1000000000" "No" "M"

"1000000000" "No" "F"

"1000000000" "No" "M"

"1000000000" "No" "M"

"1000000000" "No" "M"

"0001000000" "No" "F"

"0001000000" "No" "F"

"0001000000" "No" "F"

"0001000000" "No" "F"

"0001000000" "No" "F"

"0001000000" "No" "M"

"0001000000" "No" "M"

"0001000000" "No" "M"

"0001000000" "No" "M"

"0001000000" "No" "M"

"0001000000" "No" "F"

"0001000000" "No" "F"

"0001000000" "No" "F"

"0001000000" "No" "F"

"0001000000" "No" "F"

"0001000000" "No" "F"

"0001000000" "No" "M"

"0001000000" "No" "M"

"0001000000" "No" "M"

"0001010000" "No" "M"

"0001000000" "No" "M"

"0001000000" "No" "M"

"0001000000" "No" "F"

"0001000000" "No" "F"

"0001000000" "No" "M"

"0001000000" "No" "M"

"0001000000" "No" "M"

"0001000000" "No" "M"

"0001000000" "No" "M"

"0001000000" "No" "M"

"0001000000" "No" "M"

"0001000000" "No" "M"

"0001000000" "No" "F"

"0001000000" "No" "M"

"0001000000" "No" "M"

"0001000000" "No" "M"

"0001000000" "No" "M"

"0001000000" "No" "F"

"0001000000" "No" "M"

"0001000000" "No" "M"

"0001000000" "No" "M"

"0001001000" "No" "F"

"0001000000" "No" "F"

"0001000000" "No" "M"

"0001000000" "No" "M"

"0001000000" "No" "M"

"0001000000" "No" "M"

"0001000000" "No" "M"

"0001000000" "No" "M"

"0001000000" "No" "M"

"0001000000" "No" "M"

"0001000000" "No" "M"

"0001000000" "No" "M"

"0001000000" "No" "M"

"0001000000" "No" "M"

"0001000000" "No" "M"

"0001000000" "No" "M"

"0001010000" "No" "M"

"0001000000" "No" "M"

"0001000000" "No" "F"

"0001000000" "No" "F"

"0001000000" "No" "F"

"0001000000" "No" "F"

"0001000000" "No" "F"

"0001000000" "No" "F"

"0001000000" "No" "F"

"0001000000" "No" "F"

"0001000000" "No" "F"

"0001000000" "No" "F"

"0001000000" "No" "F"

"0001000000" "No" "F"

"0001000000" "No" "F"

"0001000000" "No" "F"

"0001000000" "No" "F"

"0001000000" "No" "M"

"1000000000" "No" "U"

"0000010000" "No" "F"

"0100000000" "Yes" "M"

"0000100000" "Yes" "M"

"0000100000" "Yes" "M"

"0100000000" "Yes" "F"

"0100000000" "Yes" "M"

"1000000000" "Yes" "M"

"0001000000" "Yes" "M"

"1000000000" "Yes" "M"

"0100000000" "Yes" "M"

"0101011000" "Yes" "M"

"0000001000" "Yes" "M"

"0000001000" "Yes" "M"

"0000100000" "Yes" "M"

"0000000100" "Yes" "M"

"0000010000" "Yes" "M"

"0100000000" "Yes" "F"

"0100000000" "Yes" "M"

"0000010000" "Yes" "M"

"1000000000" "Yes" "F"

"1000000000" "Yes" "M"

"1000000000" "Yes" "M"

"0100000000" "Yes" "M"

"1000000000" "Yes" "F"

"0000010000" "Yes" "M"

"0010000000" "Yes" "M"

"0010000000" "Yes" "M"

"0000000100" "Yes" "F"

"0000100000" "Yes" "M"

"0000001000" "Yes" "M"

"0001000000" "Yes" "M"

"0010000000" "Yes" "M"

"0010000000" "Yes" "M"

"0000000010" "Yes" "F"

"0100000000" "Yes" "F"

"1000000000" "Yes" "M"

"0000100000" "Yes" "M"

"1000000000" "Yes" "M"

"0000000100" "Yes" "M"

"0000000010" "Yes" "M"

"0000001000" "Yes" "M"

"1000000000" "Yes" "M"

"1000000000" "Yes" "M"

"0001000000" "Yes" "M"

"1000000000" "Yes" "M"

"0000000001" "Yes" "F"

"0000100000" "Yes" "M"

"0010000000" "Yes" "M"

"0000010000" "Yes" "F"

"1000000000" "Yes" "M"

"1000000000" "Yes" "M"

"0001000000" "Yes" "M"

"1000000000" "Yes" "M"

"1000000000" "Yes" "M"

"0100000000" "Yes" "M"

"1000000000" "Yes" "M"

"1000000000" "Yes" "F"

"0000100000" "Yes" "M"

"1000000000" "Yes" "M"

"0100000000" "Yes" "M"

"1000000000" "Yes" "M"

"1000000000" "Yes" "M"

"0001000000" "Yes" "M"

"1000000000" "Yes" "M"

"0100000000" "Yes" "M"

"1000000000" "Yes" "M"

"1000000000" "Yes" "M"

"0100000000" "Yes" "M"

"1000000000" "Yes" "M"

"1000000000" "Yes" "M"

"0000001000" "Yes" "F"

"0000001000" "Yes" "M"

"1000000000" "Yes" "M"

"0000000100" "Yes" "F"

"0100000000" "Yes" "M"

"0100000000" "Yes" "M"

"0100000000" "Yes" "M"

"0000010000" "Yes" "M"

"0000001000" "Yes" "M"

"0001000000" "Yes" "M"

"0100000000" "Yes" "F"

"0000010000" "Yes" "M"

"0000000110" "Yes" "M"

"0000010000" "Yes" "M"

"1000000000" "Yes" "F"

"0001000000" "Yes" "M"

"0001000000" "Yes" "M"

"0000010000" "Yes" "M"

"0001000000" "Yes" "F"

"0000100000" "Yes" "M"

"1000000000" "Yes" "M"

"0000001000" "Yes" "M"

"0000010000" "Yes" "M"

"0010000000" "Yes" "F"

"1000000000" "Yes" "M"

"1000000000" "Yes" "M"

"1000000000" "Yes" "M"

"0001000000" "Yes" "M"

"0000010000" "Yes" "M"

"1000000000" "Yes" "M"

"0000000010" "Yes" "M"

"1000000000" "Yes" "F"

"0001000000" "Yes" "M"

"0100000000" "Yes" "M"

"0000010000" "Yes" "M"

"0010000000" "Yes" "M"

"1000000000" "Yes" "M"

"0100000000" "Yes" "M"

"1000000100" "Yes" "M"

"0000010000" "Yes" "M"

"1000000000" "Yes" "M"

"0010000000" "Yes" "M"

"1000000000" "Yes" "M"

"0000100000" "Yes" "M"

"0101000000" "Yes" "M"

"0000010000" "Yes" "M"

"1000000000" "Yes" "M"

"0001000000" "Yes" "M"

"0000010000" "Yes" "M"

"0010000000" "Yes" "M"

"0010000000" "Yes" "M"

"1000000000" "Yes" "M"

"0110000000" "Yes" "M"

"0000001000" "Yes" "M"

"0001000000" "Yes" "F"

"0001000000" "Yes" "M"

"1000000000" "Yes" "M"

"0000100000" "Yes" "M"

"0000010000" "Yes" "M"

"0000000001" "Yes" "M"

"0100000000" "Yes" "M"

"0000000010" "Yes" "F"

"0011000000" "Yes" "F"

"1000000000" "Yes" "M"

"0000001000" "Yes" "M"

"0001000000" "Yes" "M"

"0011100000" "Yes" "M"

"0000001000" "Yes" "M"

"0000010000" "Yes" "M"

"0010000000" "Yes" "M"

"0000100000" "Yes" "M"

"0000100000" "Yes" "M"

"1000000000" "Yes" "F"

"0000100000" "Yes" "M"

"0100000000" "Yes" "F"

"0000010000" "Yes" "M"

"1000000000" "Yes" "M"

"0100000000" "Yes" "M"

"1000000000" "Yes" "F"

"0100000000" "Yes" "M"

"1000000000" "Yes" "M"

"0010000000" "Yes" "M"

"0000000100" "Yes" "M"

"0011000000" "Yes" "M"

"0000100000" "Yes" "M"

"0000010000" "Yes" "M"

"0000101000" "Yes" "M"

"0000000001" "Yes" "M"

"0100100000" "Yes" "M"

"0001000000" "Yes" "F"

"0000100000" "Yes" "M"

"0100000000" "Yes" "M"

"1000000000" "Yes" "M"

"0010000000" "Yes" "M"

"0010000000" "Yes" "M"

"0001000000" "Yes" "M"

"0000000010" "Yes" "F"

"0000000010" "Yes" "M"

"1000000010" "Yes" "M"

"1000000000" "Yes" "F"

"0000001000" "Yes" "M"

"0010000000" "Yes" "M"

"0100000000" "Yes" "M"

"0001000000" "Yes" "M"

"1000000000" "Yes" "M"

"1100000000" "Yes" "M"

"0001000000" "Yes" "M"

"0000000011" "Yes" "M"

"1000000000" "Yes" "M"

"0100000000" "Yes" "M"

"1000000000" "Yes" "M"

"0010000000" "Yes" "M"

"0000100000" "Yes" "F"

"0001000000" "Yes" "M"

"0000001000" "Yes" "M"

"0000000010" "Yes" "M"

"0001000000" "Yes" "M"

"1000000000" "Yes" "M"

"1000000000" "Yes" "M"

"0000010000" "Yes" "M"

"1000000000" "Yes" "M"

"1000000000" "Yes" "M"

"0001000000" "Yes" "M"

"0000011000" "Yes" "M"

"0011000000" "Yes" "M"

"1000000000" "Yes" "M"

"0100000000" "Yes" "M"

"0000100000" "Yes" "M"

"0010000000" "Yes" "M"

"0100000000" "Yes" "M"

"0001010000" "Yes" "M"

"1000000000" "Yes" "M"

"0110000000" "Yes" "M"

"1100000000" "Yes" "F"

"1000000000" "Yes" "M"

"0010000000" "Yes" "M"

"1000000000" "Yes" "M"

"0100000000" "Yes" "M"

"1000000000" "Yes" "M"

"0100000000" "Yes" "M"

"0000010000" "Yes" "M"

"0010000000" "Yes" "M"

"0000001000" "Yes" "M"

"0001000000" "Yes" "M"

"0001100000" "Yes" "M"

"0000011000" "Yes" "M"

"1000000000" "Yes" "F"

"0000100000" "Yes" "M"

"0000010000" "Yes" "M"

"1010000000" "Yes" "M"

"0110000000" "Yes" "M"

"0000100000" "Yes" "M"

"1000000000" "Yes" "M"

"0100000000" "Yes" "M"

"1000000000" "Yes" "F"

"0010000000" "Yes" "M"

"1000000000" "Yes" "M"

"1000000000" "Yes" "M"

"0000001000" "Yes" "M"

"0010000000" "Yes" "F"

"1000000000" "Yes" "M"

"0100000000" "Yes" "M"

"0100000000" "Yes" "F"

"0010000000" "Yes" "F"

"0000100000" "Yes" "M"

"0010000000" "Yes" "F"

"0001000000" "Yes" "F"

"0001000000" "Yes" "F"

"0100000000" "Yes" "F"

"1000000000" "Yes" "F"

"0100000000" "Yes" "F"

"0100000000" "Yes" "M"

"0100000000" "Yes" "F"

"0010000000" "Yes" "F"

"0100000000" "Yes" "F"

"0001000000" "Yes" "F"

"0010000000" "Yes" "F"

"1000000000" "Yes" "F"

"0000000100" "Yes" "F"

"1000000000" "Yes" "M"

"1000000000" "Yes" "F"

"0000000010" "Yes" "F"

"0010000000" "Yes" "F"

"0001000000" "Yes" "F"

"0010000000" "Yes" "F"

"0010000000" "Yes" "F"

"0001000000" "Yes" "M"

"0100000000" "Yes" "F"

"0010000000" "Yes" "F"

"0100000000" "Yes" "F"

"0010000000" "Yes" "F"

"1000000000" "Yes" "M"

"0100000000" "Yes" "F"

"0000000001" "Yes" "F"

"1000000000" "Yes" "F"

"1000000000" "Yes" "F"

"1000000000" "Yes" "F"

"0001000000" "Yes" "M"

"0100000000" "Yes" "M"

"0100000000" "Yes" "F"

"0100000000" "Yes" "M"

"0000100000" "Yes" "F"

"0001000000" "Yes" "F"

"0000001000" "Yes" "F"

"0000000001" "Yes" "F"

"0001000000" "Yes" "F"

"0001000000" "Yes" "M"

"0000000001" "Yes" "M"

"0000000010" "Yes" "M"

"1000000000" "Yes" "F"

"0000001000" "Yes" "F"

"0001000000" "Yes" "M"

"0100000000" "Yes" "M"

"1000000000" "Yes" "M"

"0100000000" "Yes" "F"

"0010000000" "Yes" "M"

"0000100000" "Yes" "M"

"0001000000" "Yes" "F"

"0010000000" "Yes" "M"

"0010000000" "Yes" "F"

"0000010000" "Yes" "M"

"1000000000" "Yes" "M"

"1100000000" "Yes" "F"

"0100000000" "Yes" "F"

"0000001000" "Yes" "M"

"1000000000" "Yes" "F"

"1000000000" "Yes" "M"

"0100000000" "Yes" "M"

"0000000001" "Yes" "M"

"0010000000" "Yes" "M"

"0000000001" "Yes" "M"

"0000001000" "Yes" "M"

"1000000000" "Yes" "M"

"1000000000" "Yes" "M"

"0001000000" "Yes" "F"

"0010000000" "Yes" "F"

"1000000000" "Yes" "F"

"0010000000" "Yes" "F"

"1000000000" "Yes" "F"

"0001000000" "Yes" "F"

"1000000000" "Yes" "F"

"0000010000" "Yes" "F"

"1000000000" "Yes" "M"

"0000000100" "Yes" "F"

"1000000000" "Yes" "F"

"0000100000" "Yes" "F"

"0010000000" "Yes" "M"

"0110000000" "Yes" "M"

"0000000100" "Yes" "M"

"1000000000" "Yes" "F"

"0010000000" "Yes" "F"

"0000010000" "Yes" "F"

"0000001000" "Yes" "M"

"0101000000" "Yes" "M"

"1000000000" "Yes" "F"

"1000000000" "Yes" "F"

"0010000000" "Yes" "M"

"0100000000" "Yes" "F"

"1000000000" "Yes" "M"

"0100000000" "Yes" "F"

"1000000000" "Yes" "M"

"1100000000" "Yes" "M"

"0100000000" "Yes" "M"

"1000000000" "Yes" "U"

"1000000000" "Yes" "F"

"1000000000" "Yes" "M"

"0100000000" "Yes" "F"

"0100000000" "Yes" "M"

"1000000000" "Yes" "M"

"1000000000" "Yes" "M"

"0100000000" "Yes" "M"

"0000100000" "Yes" "M"

"0000010000" "Yes" "M"

"0000010000" "Yes" "F"

"0100000000" "Yes" "F"

"0100000000" "Yes" "F"

"0100000000" "Yes" "M"

"0100000000" "Yes" "F"

"0010000000" "Yes" "M"

"1000000000" "Yes" "M"

"0000001000" "Yes" "M"

"0100000000" "Yes" "M"

"1000000000" "Yes" "M"

"0000100000" "Yes" "F"

"1000000000" "Yes" "M"

"0000100000" "Yes" "F"

"1000000000" "Yes" "F"

"0010000000" "Yes" "F"

"1000000000" "Yes" "M"

"0010000000" "Yes" "M"

"1000000000" "Yes" "M"

"1000000000" "Yes" "F"

"1000000000" "Yes" "F"

"0000000001" "Yes" "M"

"0010000000" "Yes" "M"

"0001000000" "Yes" "F"

"0000000010" "Yes" "M"

"0100000000" "Yes" "M"

"1000000000" "Yes" "M"

"0010000000" "Yes" "M"

"0001000000" "Yes" "F"

"1000000000" "Yes" "F"

"0100000000" "Yes" "M"

"1000000000" "Yes" "M"

"1000000000" "Yes" "M"

"0100000000" "Yes" "F"

"1000000000" "Yes" "M"

"0010000000" "Yes" "M"

"0100000000" "Yes" "M"

"1000000000" "Yes" "M"

"0000010000" "Yes" "M"

"0100000000" "Yes" "F"

"1000000000" "Yes" "M"

"0001000000" "Yes" "F"

"1000000000" "Yes" "F"

"0100000000" "Yes" "M"

"0100000000" "Yes" "M"

"0010000000" "Yes" "F"

"0100000000" "Yes" "M"

"0000001000" "Yes" "M"

"0001000000" "Yes" "F"

"1000000000" "Yes" "M"

"1000000000" "Yes" "M"

"0100000000" "Yes" "M"

"0100000000" "Yes" "F"

"1000000000" "Yes" "F"

"0001000000" "Yes" "F"

"0001000000" "Yes" "M"

"1000000000" "Yes" "M"

"0100000000" "Yes" "M"

"1000000000" "Yes" "M"

"1000000000" "Yes" "F"

"1000000000" "Yes" "M"

"0101000000" "Yes" "F"

"0000010000" "Yes" "F"

"0100000000" "Yes" "M"

"0001000000" "Yes" "M"

"1000000000" "Yes" "M"

"1000000000" "Yes" "F"

"0100000000" "Yes" "M"

"0100000000" "Yes" "F"

"0100000000" "Yes" "F"

"0100000000" "Yes" "M"

"0100000000" "Yes" "M"

"0000010000" "Yes" "M"

"1000000000" "Yes" "M"

"1000000000" "Yes" "F"

"1000000000" "Yes" "F"

"0001000000" "Yes" "M"

"0001000000" "Yes" "M"

"0000100000" "Yes" "F"

"1000000000" "Yes" "M"

"0000001000" "Yes" "M"

"0000001000" "Yes" "F"

"0101000000" "Yes" "M"

"1000000000" "Yes" "M"

"0000000010" "Yes" "M"

"0000001000" "Yes" "M"

"0001000000" "Yes" "U"

"0000100000" "Yes" "U"

"0010000000" "Yes" "M"

"1000000000" "Yes" "F"

"0001000000" "Yes" "M"

"0000010000" "Yes" "F"

"0000100000" "Yes" "M"

"0000001000" "Yes" "M"

"1000000000" "Yes" "F"

"0100000000" "Yes" "M"

"1000000000" "Yes" "F"

"0000000100" "Yes" "M"

"0100000000" "Yes" "M"

"0001000000" "Yes" "F"

"0100000000" "Yes" "M"

"0100000000" "Yes" "M"

"1000000000" "Yes" "M"

"0010000000" "Yes" "F"

"0000010000" "Yes" "M"

"0100000000" "Yes" "M"

"1000000000" "Yes" "M"

"0100000000" "Yes" "M"

"0100000000" "Yes" "F"

"1000000000" "Yes" "F"

"1000000000" "Yes" "F"

"0001000000" "Yes" "M"

"1000000000" "Yes" "M"

"0001000000" "Yes" "F"

"1000000000" "Yes" "F"

"0001000000" "Yes" "F"

"0000010000" "Yes" "F"

"1000000000" "Yes" "F"

"0000001000" "Yes" "F"

"1000000000" "Yes" "F"

"0000100000" "Yes" "F"

"0001000000" "Yes" "F"

"0010000000" "Yes" "M"

"1000000000" "Yes" "F"

"0000100000" "Yes" "F"

"0100000000" "Yes" "F"

"0100000000" "Yes" "F"

"0001000000" "Yes" "M"

"0000000010" "Yes" "M"

"0000001000" "Yes" "M"

"1000000000" "Yes" "F"

"0010000000" "Yes" "F"

"0000010000" "Yes" "F"

"0000100000" "Yes" "F"

"0100000000" "Yes" "F"

"1000000000" "Yes" "M"

"1000000000" "Yes" "M"

"1000000000" "Yes" "M"

"1000000000" "Yes" "M"

"1000000000" "Yes" "M"

"0010000000" "Yes" "M"

"0011000000" "Yes" "M"

"0100000000" "Yes" "F"

"1000000000" "Yes" "M"

"1000000000" "Yes" "M"

"0100000000" "Yes" "F"

"1000000000" "Yes" "F"

"0100000000" "Yes" "M"

"0100000000" "Yes" "F"

"0000100000" "Yes" "M"

"1000000000" "Yes" "M"

"0000010000" "Yes" "F"

"0000001000" "Yes" "M"

"1000000000" "Yes" "M"

"0001000000" "Yes" "M"

"0000010000" "Yes" "M"

"0001000000" "Yes" "M"

"0000001000" "Yes" "F"

"0000000010" "Yes" "M"

"1000000000" "Yes" "F"

"0100000000" "Yes" "M"

"1000000000" "Yes" "M"

"0100000000" "Yes" "M"

"1000000000" "Yes" "F"

"1000000000" "Yes" "M"

"0100000000" "Yes" "M"

"1000000000" "Yes" "M"

"0001000000" "Yes" "M"

"1000000000" "Yes" "M"

"0101000000" "Yes" "M"

"1000000000" "Yes" "M"

"1000000000" "Yes" "M"

"0100000000" "Yes" "M"

"1000000000" "Yes" "F"

"0000000010" "Yes" "F"

"0000100000" "Yes" "M"

"1000000000" "Yes" "M"

"1000000000" "Yes" "M"

"0010000000" "Yes" "F"

"0010000000" "Yes" "M"

"0000000010" "Yes" "M"

"1000000000" "Yes" "F"

"0010000000" "Yes" "F"

"0100000000" "Yes" "M"

"1110000000" "Yes" "M"

"0000100000" "Yes" "F"

"1000000000" "Yes" "M"

"1000000000" "Yes" "F"

"0010000000" "Yes" "M"

"1000000000" "Yes" "F"

"0100000000" "Yes" "F"

"1000000000" "Yes" "M"

"1000000000" "Yes" "F"

"0000001000" "Yes" "F"

"1000000000" "Yes" "M"

"0000010000" "Yes" "M"

"1000000000" "Yes" "F"

"0100000000" "Yes" "F"

"0011000000" "Yes" "M"

"0010000000" "Yes" "M"

"1000000000" "Yes" "F"

"0000000010" "Yes" "M"

"0100000000" "Yes" "M"

"0100000000" "Yes" "U"

"0010000000" "Yes" "U"

"0000100000" "Yes" "U"

"0010000000" "Yes" "U"

"1000000000" "Yes" "F"

"1000000000" "Yes" "F"

"1000000000" "Yes" "F"

"0010000000" "Yes" "F"

"0000001000" "Yes" "F"

"0100000000" "Yes" "F"

"0010000000" "Yes" "F"

"1000000000" "Yes" "F"

"0100000000" "Yes" "F"

"1000000000" "Yes" "M"

"0100000000" "Yes" "M"

"1000000000" "Yes" "M"

"1000000000" "Yes" "F"

"1000000000" "Yes" "F"

"0001000000" "Yes" "F"

"0010000000" "Yes" "M"

"1000000000" "Yes" "F"

"1000000000" "Yes" "F"

"0010000000" "Yes" "F"

"1000000000" "Yes" "M"

"0000000010" "Yes" "M"

"1000000000" "Yes" "F"

"0000100000" "Yes" "M"

"0000100000" "Yes" "F"

"0100000000" "Yes" "F"

"0100000000" "Yes" "F"

"0000000010" "Yes" "F"

"0100000000" "Yes" "F"

"0100000000" "Yes" "F"

"0000010000" "Yes" "F"

"0100000000" "Yes" "F"

"0000010000" "Yes" "F"

"1000000000" "Yes" "F"

"1000000000" "Yes" "F"

"0010000000" "Yes" "M"

"0000000100" "Yes" "M"

"1000000000" "Yes" "M"

"0100000000" "Yes" "M"

"1000000000" "Yes" "F"

"1000000000" "Yes" "F"

"1000000000" "Yes" "F"

"1000000000" "Yes" "F"

"1000000000" "Yes" "F"

"0100000000" "Yes" "F"

"0001000000" "Yes" "F"

"0010000000" "Yes" "F"

"0100000000" "Yes" "F"

"0001000000" "Yes" "F"

"0000000010" "Yes" "M"

"1000000000" "Yes" "M"

"1000000000" "Yes" "M"

"1000000000" "Yes" "M"

"0011000000" "Yes" "F"

"0100000000" "Yes" "F"

"1000000000" "Yes" "F"

"0001000000" "Yes" "F"

"0001000000" "Yes" "M"

"0000010000" "Yes" "F"

"1000000000" "Yes" "M"

"0000010000" "Yes" "M"

"1000000000" "Yes" "M"

"0010000000" "Yes" "F"

"1000000000" "Yes" "F"

"0001000000" "Yes" "M"

"1000000000" "Yes" "M"

"0000100000" "Yes" "M"

"1000000000" "Yes" "M"

"0001000000" "Yes" "M"

"0001000000" "Yes" "M"

"1000000000" "Yes" "M"

"0000100000" "Yes" "F"

"0100000000" "Yes" "F"

"0001000000" "Yes" "M"

"0010000000" "Yes" "F"

"1000000000" "Yes" "F"

"0000100000" "Yes" "M"

"0010000000" "Yes" "F"

"0000001000" "Yes" "M"

"0000001000" "Yes" "F"

"1000000000" "Yes" "F"

"1000000000" "Yes" "F"

"0000100000" "Yes" "M"

"1000000000" "Yes" "F"

"0001000000" "Yes" "F"

"0010000000" "Yes" "F"

"0000001000" "Yes" "M"

"1000000000" "Yes" "F"

"1000000000" "Yes" "F"

"1000000000" "Yes" "F"

"0001000000" "Yes" "F"

"1000000000" "Yes" "F"

"0100000000" "Yes" "F"

"1000010000" "Yes" "M"

"1000000000" "Yes" "F"

"0001000000" "Yes" "M"

"1000000000" "Yes" "F"

"1000000000" "Yes" "M"

"1000000000" "Yes" "M"

"1000000000" "Yes" "F"

"1000000000" "Yes" "M"

"1001000000" "Yes" "M"

"1000000000" "Yes" "F"

"0100000000" "Yes" "M"

"0001000000" "Yes" "M"

"0000010000" "Yes" "M"

"1000000000" "Yes" "F"

"0010000000" "Yes" "M"

"1000000000" "Yes" "M"

"0001000000" "Yes" "M"

"0100000000" "Yes" "M"

"0100000000" "Yes" "F"

"0000100000" "Yes" "M"

"0010000000" "Yes" "F"

"1000000000" "Yes" "F"

"0001000000" "Yes" "F"

"1000000000" "Yes" "F"

"1000000000" "Yes" "M"

"0100000000" "Yes" "F"

"0001000000" "Yes" "F"

"0010000000" "Yes" "M"

"0000010000" "Yes" "F"

"0100000000" "Yes" "M"

"0100100000" "Yes" "M"

"0010000000" "Yes" "M"

"1000000000" "Yes" "F"

"0100000000" "Yes" "M"

"1000000000" "Yes" "M"

"1000000000" "Yes" "F"

"1000000000" "Yes" "F"

"1000000000" "Yes" "M"

"0010000000" "Yes" "M"

"0000010000" "Yes" "F"

"0000010000" "Yes" "M"

"0001000000" "Yes" "M"

"0101000000" "Yes" "M"

"1000000000" "Yes" "F"

"0100000000" "Yes" "M"

"0100000000" "Yes" "F"

"0100000000" "Yes" "M"

"0001000000" "Yes" "M"

"1001000000" "Yes" "M"

"0100000000" "Yes" "F"

"1000000000" "Yes" "M"

"1000000000" "Yes" "M"

"1000000000" "Yes" "F"

"0100000000" "No" "M"

"0100000000" "No" "M"

"0100000000" "No" "M"

"0100000000" "No" "M"

"0100000000" "No" "M"

"0100000000" "No" "M"

"0100000000" "No" "M"

"0100000000" "No" "M"

"0100000000" "No" "M"

"0100000000" "No" "M"

"0100000000" "No" "M"

"0100000000" "No" "F"

"0100000000" "No" "M"

"0100000000" "No" "M"

"0100000000" "No" "M"

"0101000000" "No" "M"

"0100000000" "No" "M"

"0100000000" "No" "F"

"0100000000" "No" "M"

"0100000000" "No" "M"

"0100000000" "No" "M"

"0100000000" "No" "M"

"0100000000" "No" "M"

"0100000000" "No" "M"

"0100000000" "No" "M"

"1000000000" "Yes" "F"

"1000000000" "Yes" "F"

"1000000000" "Yes" "F"

"1000000000" "Yes" "F"

"1000000000" "Yes" "M"

"1000000000" "Yes" "F"

"1000000000" "Yes" "F"

"1000000000" "Yes" "M"

"1000000000" "Yes" "M"

"1000000000" "Yes" "M"

"1000000000" "Yes" "F"

"1000000000" "Yes" "M"

"1000000000" "Yes" "M"

"1000000000" "Yes" "F"

"1000000000" "Yes" "F"

"1000000000" "Yes" "M"

"1000000000" "Yes" "M"

"1000000000" "Yes" "M"

"1000000000" "Yes" "F"

"1000000000" "Yes" "M"

"1000000000" "Yes" "M"

"1000000000" "Yes" "F"

"1000000000" "Yes" "F"

"1000000000" "Yes" "M"

"1000000000" "Yes" "M"

"1000000000" "Yes" "F"

"1000000000" "Yes" "F"

"1000000000" "Yes" "F"

"1000000000" "Yes" "F"

"1000000000" "Yes" "F"

"1000000000" "Yes" "M"

"1000000000" "Yes" "M"

"1000000000" "Yes" "F"

"1000000000" "Yes" "M"

"1000000000" "Yes" "M"

"1000000000" "Yes" "F"

"1000000000" "Yes" "M"

"1000000000" "Yes" "M"

"1000000000" "Yes" "M"

"1000000000" "Yes" "F"

"1000000000" "Yes" "F"

"1000000000" "Yes" "M"

"1000000000" "Yes" "M"

"1000000000" "Yes" "M"

"1000000000" "Yes" "F"

"1000000000" "Yes" "M"

"1000000000" "Yes" "F"

"1000000000" "Yes" "M"

"1000000000" "Yes" "F"

"1000000000" "Yes" "M"

"1000000000" "Yes" "M"

"1000000000" "Yes" "F"

"1000000000" "Yes" "F"

"1100000000" "Yes" "F"

"1000000000" "Yes" "M"

"1000000000" "Yes" "F"

"1000000000" "Yes" "F"

"1100000000" "Yes" "M"

"1000000000" "Yes" "F"

"1000000000" "Yes" "F"

"1000000000" "Yes" "F"

"1000000000" "Yes" "M"

"1000000000" "Yes" "M"

"1000000000" "Yes" "M"

"1000000000" "Yes" "M"

"1000000000" "Yes" "F"

"1000000000" "Yes" "M"

"1000000000" "Yes" "F"

"1100000000" "Yes" "M"

"1000000000" "Yes" "F"

"1000000000" "Yes" "M"

"1000000000" "Yes" "M"

"1000000000" "Yes" "F"

"1010000000" "Yes" "M"

"1000000000" "Yes" "F"

"1000000000" "Yes" "M"

"1000000000" "Yes" "F"

"1000000000" "Yes" "F"

"1000000000" "Yes" "M"

"1000000000" "Yes" "F"

"1000000000" "Yes" "F"

"1000000000" "Yes" "F"

"1000000000" "Yes" "M"

"1000000000" "Yes" "M"

"1000000000" "Yes" "F"

"1000000000" "Yes" "F"

"1000000000" "Yes" "F"

"1000000000" "Yes" "F"

"1000000000" "Yes" "M"

"1000000000" "Yes" "M"

"1000000000" "Yes" "M"

"1000000000" "Yes" "M"

"1000000000" "Yes" "F"

"1000000000" "Yes" "M"

"1000000000" "Yes" "M"

"1000000000" "Yes" "F"

"1000000000" "Yes" "F"

"1000000000" "Yes" "M"

"1100000000" "Yes" "M"

"1000000000" "Yes" "F"

"1000000000" "Yes" "F"

"1001000000" "Yes" "M"

"1000000000" "Yes" "F"

"1000000000" "Yes" "F"

"1000000000" "Yes" "F"

"1000000000" "Yes" "F"

"1000000000" "Yes" "F"

"1100000000" "Yes" "M"

"1000000000" "Yes" "F"

"1000000000" "Yes" "F"

"1000000000" "Yes" "M"

"1000000000" "Yes" "M"

"1000000000" "Yes" "M"

"1100000000" "Yes" "F"

"1000000000" "Yes" "F"

"1000000000" "Yes" "F"

"1000000000" "Yes" "M"

"1000000000" "Yes" "M"

"1000100000" "Yes" "F"

"1000000000" "Yes" "M"

"1000000000" "Yes" "M"

"1000000000" "Yes" "F"

"1000000000" "Yes" "M"

"1000000000" "Yes" "F"

"1000000000" "Yes" "M"

"1000000000" "Yes" "M"

"1000000000" "Yes" "F"

"1100000000" "Yes" "M"

"1100000000" "Yes" "F"

"1100000000" "Yes" "M"

"1000000000" "Yes" "F"

"1100000000" "Yes" "M"

"1000000000" "Yes" "F"

"1000000000" "Yes" "F"

"1000000000" "Yes" "F"

"1000000000" "Yes" "M"

"1000000000" "Yes" "F"

"1000000000" "Yes" "M"

"1000000000" "Yes" "F"

"1000000000" "Yes" "F"

"1000000000" "Yes" "M"

"1000100000" "Yes" "M"

"1000000000" "Yes" "M"

"1000000000" "Yes" "F"

"1000000000" "Yes" "M"

"1100000000" "Yes" "F"

"1000000000" "Yes" "M"

"1000000000" "Yes" "F"

"1100000000" "Yes" "M"

"1000000000" "Yes" "M"

"1000000000" "Yes" "M"

"1000000000" "Yes" "M"

"1000000000" "Yes" "F"

"1000000000" "Yes" "M"

"1000000000" "Yes" "F"

"1000000000" "Yes" "F"

"1000000000" "Yes" "F"

"1000000000" "Yes" "F"

"1100000000" "Yes" "M"

"1000000000" "Yes" "M"

"1000000000" "Yes" "M"

"1000000000" "Yes" "M"

"1000000000" "Yes" "M"

"1000000000" "Yes" "F"

"1000000000" "Yes" "M"

"1000000000" "Yes" "F"

"1000000000" "Yes" "F"

"1000000000" "Yes" "M"

"1000000000" "Yes" "M"

"1000000000" "Yes" "M"

"1000000000" "Yes" "F"

"1000000000" "Yes" "F"

"1000000000" "Yes" "F"

"1000000000" "Yes" "F"

"1000000000" "Yes" "F"

"1000000000" "Yes" "F"

"1000000000" "Yes" "F"

"1000000000" "Yes" "F"

"1000000000" "Yes" "F"

"1000000000" "Yes" "M"

"1000000000" "Yes" "M"

"1000000000" "Yes" "M"

"1000000000" "Yes" "F"

"1000000000" "Yes" "F"

"1000000000" "Yes" "F"

"1000000000" "Yes" "F"

"1000000000" "Yes" "M"

"1000000000" "Yes" "M"

"1000000000" "Yes" "M"

"1000000000" "Yes" "F"

"1000000000" "Yes" "M"

"1000000000" "Yes" "M"

"1000000000" "Yes" "M"

"1000000000" "Yes" "F"

"1000000000" "Yes" "M"

"1000000000" "Yes" "F"

"1000000000" "Yes" "M"

"1000000000" "Yes" "M"

"1000000000" "Yes" "M"

"1000000000" "Yes" "F"

"1000000000" "Yes" "M"

"1000000000" "Yes" "M"

"1000000000" "Yes" "M"

"1000000000" "Yes" "M"

"1000000000" "Yes" "M"

"1000000000" "Yes" "M"

"1000000000" "Yes" "F"

"1000000000" "Yes" "F"

"1000000000" "Yes" "F"

"1000000000" "Yes" "F"

"1000000000" "Yes" "M"

"1000000000" "Yes" "F"

"1000000000" "Yes" "M"

"1000000000" "Yes" "F"

"1000000000" "Yes" "F"

"1000000000" "Yes" "M"

"1000000000" "Yes" "F"

"1000000000" "Yes" "F"

"1000000000" "Yes" "F"

"1000000000" "Yes" "F"

"1000000000" "Yes" "F"

"1000000000" "Yes" "M"

"1000000000" "Yes" "M"

"1000000000" "Yes" "M"

"1000000000" "Yes" "F"

"1000000000" "Yes" "M"

"1000000000" "Yes" "F"

"1000000000" "Yes" "M"

"1000000000" "Yes" "F"

"1000000000" "Yes" "F"

"1000000000" "Yes" "M"

"1000000000" "Yes" "F"

"1000000000" "Yes" "F"

"1000000000" "Yes" "F"

"1000000000" "Yes" "F"

"1000000000" "Yes" "M"

"1001000000" "Yes" "M"

"1000000000" "Yes" "M"

"1000000000" "Yes" "M"

"1000000000" "Yes" "M"

"1000000000" "Yes" "M"

"1000000000" "Yes" "M"

"1000000000" "Yes" "M"

"1000000000" "Yes" "F"

"1000000000" "Yes" "F"

"1000000000" "Yes" "F"

"1000000000" "Yes" "F"

"1000000000" "Yes" "F"

"1000000000" "Yes" "F"

"1000000000" "Yes" "M"

"1000000000" "Yes" "F"

"1000000000" "Yes" "M"

"1000010000" "Yes" "F"

"1000000000" "Yes" "F"

"1000000000" "Yes" "F"

"1000000000" "Yes" "M"

"1000000000" "Yes" "F"

"1000000000" "Yes" "M"

"1000000000" "Yes" "M"

"1000000000" "Yes" "M"

"1000000000" "Yes" "F"

"1000000000" "Yes" "M"

"1000000000" "Yes" "M"

"1000000000" "Yes" "M"

"1000000000" "Yes" "F"

"1000000000" "Yes" "F"

"1000000000" "Yes" "F"

"1000000000" "Yes" "F"

"1000000000" "Yes" "F"

"1000000000" "Yes" "F"

"1000000000" "Yes" "M"

"1000000000" "Yes" "M"

"1000000000" "Yes" "M"

"1000000000" "Yes" "M"

"1000000000" "Yes" "F"

"1000000000" "Yes" "M"

"1000000000" "Yes" "F"

"1000000000" "Yes" "F"

"1000000000" "Yes" "M"

"1000000000" "Yes" "F"

"1000000000" "Yes" "M"

"1000000000" "Yes" "F"

"1000000000" "Yes" "M"

"1000000000" "Yes" "M"

"1000000000" "Yes" "M"

"1000000000" "Yes" "M"

"1000000000" "Yes" "F"

"1000000000" "Yes" "F"

"1000000000" "Yes" "F"

"1000000000" "Yes" "F"

"1000000000" "Yes" "M"

"1000000000" "Yes" "M"

"1000000000" "Yes" "F"

"1000000000" "Yes" "F"

"1000000000" "Yes" "M"

"1000000000" "Yes" "M"

"1000000000" "Yes" "M"

"1000000000" "Yes" "F"

"1000000000" "Yes" "F"

"1000000000" "Yes" "M"

"1000000000" "Yes" "M"

"1000000000" "Yes" "M"

"1000000000" "Yes" "M"

"1000000000" "Yes" "F"

"1000000000" "Yes" "F"

"1000000000" "Yes" "M"

"1000000000" "Yes" "F"

"1000000000" "Yes" "M"

"1000000000" "Yes" "F"

"1000000000" "Yes" "M"

"1000000000" "Yes" "F"

"1000000000" "Yes" "F"

"1000000000" "Yes" "F"

"1000000000" "Yes" "F"

"1000000000" "Yes" "F"

"1000000000" "Yes" "M"

"1000000000" "Yes" "M"

"1000000000" "Yes" "F"

"1000000000" "Yes" "F"

"1000000000" "Yes" "M"

"1000000000" "Yes" "M"

"1000000000" "Yes" "F"

"1000000000" "Yes" "M"

"1000000000" "Yes" "M"

"1000000000" "Yes" "M"

"1000000000" "Yes" "M"

"1000000000" "Yes" "F"

"1000000000" "Yes" "M"

"1000000000" "Yes" "M"

"1000000000" "Yes" "F"

"1000000000" "Yes" "F"

"1000000000" "Yes" "M"

"1000000000" "Yes" "M"

"1000000000" "Yes" "M"

"1000000000" "Yes" "M"

"1000000000" "Yes" "M"

"1000000000" "Yes" "F"

"1000000000" "Yes" "F"

"1101000000" "Yes" "F"

"1000000000" "Yes" "F"

"1000000000" "Yes" "M"

"1000000000" "Yes" "F"

"1000000000" "Yes" "F"

"1000000000" "Yes" "M"

"1000000000" "Yes" "M"

"1000000000" "Yes" "F"

"1000000000" "Yes" "F"

"1000000000" "Yes" "F"

"1000000000" "Yes" "M"

"1000000000" "Yes" "M"

"1000000000" "Yes" "M"

"1000000000" "Yes" "M"

"1000000000" "Yes" "M"

"1000000000" "Yes" "M"

"1100000000" "Yes" "M"

"1000000000" "Yes" "M"

"1000000000" "Yes" "M"

"1000000000" "Yes" "M"

"1000000000" "Yes" "M"

"1000000000" "Yes" "F"

"1000000000" "Yes" "M"

"1000000000" "Yes" "F"

"1000000000" "Yes" "M"

"1000000000" "Yes" "M"

"1000000000" "Yes" "M"

"1100000000" "Yes" "F"

"1000000000" "Yes" "M"

"1000000000" "Yes" "M"

"1000000000" "Yes" "M"

"1000000000" "Yes" "M"

"1000000000" "Yes" "M"

"1000000000" "Yes" "M"

"1000000000" "Yes" "M"

"1000000000" "Yes" "M"

"1000000000" "Yes" "F"

"1000000000" "Yes" "F"

"1000000000" "Yes" "M"

"1000000000" "Yes" "M"

"1000000000" "Yes" "F"

"1000000000" "Yes" "F"

"1100000000" "Yes" "F"

"1000000000" "Yes" "M"

"1000000000" "Yes" "M"

"1000000000" "Yes" "F"

"1000000000" "Yes" "F"

"1100000000" "Yes" "F"

"1000000000" "Yes" "F"

"1000000000" "Yes" "M"

"1000000000" "Yes" "F"

"1000000000" "Yes" "M"

"1000000000" "Yes" "F"

"1000000000" "Yes" "F"

"1000000000" "Yes" "F"

"1000000000" "Yes" "F"

"1000000000" "Yes" "F"

"1000000000" "Yes" "M"

"1000000000" "Yes" "F"

"1000000000" "Yes" "F"

"1000000000" "Yes" "F"

"1000000000" "Yes" "F"

"1010000000" "Yes" "M"

"1000000000" "Yes" "F"

"1000000000" "Yes" "F"

"1000000000" "Yes" "M"

"1000000000" "Yes" "F"

"1000000000" "Yes" "M"

"1000000000" "Yes" "M"

"1000000000" "Yes" "F"

"1000000000" "Yes" "M"

"1001000000" "Yes" "F"

"1000000000" "Yes" "F"

"1000000000" "Yes" "M"

"1000000000" "Yes" "M"

"1000000000" "Yes" "M"

"1000000000" "Yes" "M"

"1000000000" "Yes" "M"

"1000000000" "Yes" "F"

"1000000000" "Yes" "F"

"1000000000" "Yes" "M"

"1000000000" "Yes" "F"

"1000000000" "Yes" "M"

"1000000000" "Yes" "F"

"1000000000" "Yes" "F"

"1100000000" "Yes" "F"

"1000000000" "Yes" "F"

"1000000000" "Yes" "M"

"1000000000" "Yes" "F"

"1000000000" "Yes" "F"

"1000000000" "Yes" "F"

"1000000000" "Yes" "M"

"1000000000" "Yes" "M"

"1000000000" "Yes" "F"

"1000000000" "Yes" "M"

"1000000000" "Yes" "M"

"1000000000" "Yes" "F"

"1000000000" "Yes" "M"

"1000000000" "Yes" "F"

"1000000000" "Yes" "M"

"1000000000" "Yes" "M"

"1000000000" "Yes" "M"

"1000000000" "Yes" "F"

"1000000000" "Yes" "F"

"1000000000" "Yes" "M"

"1000000000" "Yes" "F"

"1000000000" "Yes" "F"

"1000000000" "Yes" "F"

"1000000000" "Yes" "F"

"1000000000" "Yes" "M"

"1000000000" "Yes" "M"

"1000000000" "Yes" "F"

"1000000000" "Yes" "M"

"1000000000" "Yes" "M"

"1000000000" "Yes" "M"

"1000000000" "Yes" "M"

"1000000000" "Yes" "M"

"1000000000" "Yes" "M"

"1000000000" "Yes" "M"

"1000000000" "Yes" "M"

"1000000000" "Yes" "M"

"1010000000" "Yes" "M"

"1000000000" "Yes" "M"

"1000000000" "Yes" "M"

"1000000000" "Yes" "M"

"1000000000" "Yes" "M"

"1000000000" "Yes" "M"

"1000000000" "Yes" "F"

"1000000000" "Yes" "M"

"1000000000" "Yes" "M"

"1000000000" "Yes" "M"

"1000000000" "Yes" "M"

"1000000000" "Yes" "M"

"1000000000" "Yes" "M"

"1000000000" "Yes" "M"

"1000000000" "Yes" "M"

"1000000000" "Yes" "F"

"1000000000" "Yes" "F"

"1000000000" "Yes" "F"

"1000000000" "Yes" "F"

"1000000000" "Yes" "F"

"1100000000" "Yes" "F"

"1000000000" "Yes" "F"

"1000000000" "Yes" "F"

"1000000000" "Yes" "F"

"1000000000" "Yes" "F"

"1100000000" "Yes" "F"

"1000000000" "Yes" "M"

"1100000000" "Yes" "F"

"1100000000" "Yes" "F"

"1000000000" "Yes" "F"

"1000000000" "Yes" "F"

"1000000000" "Yes" "F"

"1000000000" "Yes" "F"

"1000000000" "Yes" "F"

"1000000000" "Yes" "F"

"1000000000" "Yes" "F"

"1000000000" "Yes" "F"

"1000000000" "Yes" "F"

"1000000000" "Yes" "F"

"1100000000" "Yes" "F"

"1100000000" "Yes" "F"

"1010000000" "Yes" "F"

"1000000000" "Yes" "M"

"1000000000" "Yes" "M"

"1000000000" "Yes" "M"

"1000000000" "Yes" "M"

"1000000000" "Yes" "M"

"1000000000" "Yes" "F"

"1000000000" "Yes" "M"

"1000000000" "Yes" "M"

"1100000000" "Yes" "F"

"1100000000" "Yes" "F"

"1000000000" "Yes" "M"

"1000000000" "Yes" "F"

"1000000000" "Yes" "F"

"1000000000" "Yes" "M"

"1010000000" "Yes" "F"

"1000000000" "Yes" "M"

"1000000000" "Yes" "F"

"1000000000" "Yes" "F"

"1000000000" "Yes" "M"

"1000000000" "Yes" "M"

"1010000000" "Yes" "F"

"1100000000" "Yes" "F"

"1000000000" "Yes" "M"

"1000000000" "Yes" "M"

"1100000000" "Yes" "M"

"1000000000" "Yes" "M"

"1010000000" "Yes" "M"

"1000000000" "Yes" "M"

"1100000000" "Yes" "M"

"1000000000" "Yes" "F"

"1000000000" "Yes" "F"

"1100000000" "Yes" "M"

"1100000000" "Yes" "M"

"1010000000" "Yes" "M"

"1000000000" "Yes" "M"

"1100000000" "Yes" "M"

"1000000000" "Yes" "M"

"1000000000" "Yes" "F"

"1100000000" "Yes" "M"

"1000000000" "Yes" "M"

"1000000000" "Yes" "M"

"1000000000" "Yes" "M"

"1000000000" "Yes" "M"

"1000000000" "Yes" "M"

"1000000000" "Yes" "M"

"1000000000" "Yes" "M"

"1100000000" "Yes" "M"

"1000000000" "Yes" "M"

"1000000000" "Yes" "M"

"1100000000" "Yes" "F"

"1000000000" "Yes" "F"

"1000000000" "Yes" "F"

"1000000000" "Yes" "F"

"1000000000" "Yes" "F"

"1000000000" "Yes" "F"

"1000000000" "Yes" "F"

"1000000000" "Yes" "F"

"1000000000" "Yes" "F"

"1000000000" "Yes" "F"

"1000000000" "Yes" "F"

"1000000000" "Yes" "F"

"1000000000" "Yes" "F"

"1000000000" "Yes" "F"

"1000000000" "Yes" "F"

"1000000000" "Yes" "F"

"1000000000" "Yes" "F"

"1010000000" "Yes" "F"

"1000000000" "Yes" "F"

"1000000000" "Yes" "F"

"1010000000" "Yes" "F"

"1000000000" "Yes" "F"

"1000000000" "Yes" "F"

"1000000000" "Yes" "F"

"1000000000" "Yes" "F"

"1000000000" "Yes" "F"

"1000000000" "Yes" "F"

"1010000000" "Yes" "F"

"1000000000" "Yes" "F"

"1000000000" "Yes" "M"

"1000000000" "Yes" "M"

"1000000000" "Yes" "M"

"1000000000" "Yes" "F"

"1010000000" "Yes" "M"

"1010000000" "Yes" "M"

"1000000000" "Yes" "M"

"1010000000" "Yes" "M"

"1010000000" "Yes" "M"

"1000000000" "Yes" "F"

"1100000000" "Yes" "F"

"1000000000" "Yes" "M"

"1000000000" "Yes" "F"

"1000000000" "Yes" "M"

"1010000000" "Yes" "F"

"1010000000" "Yes" "M"

"1000000000" "Yes" "F"

"1000000000" "Yes" "M"

"1000000000" "Yes" "M"

"1000000000" "Yes" "F"

"1100000000" "Yes" "M"

"1000000000" "Yes" "F"

"1100000000" "Yes" "F"

"1100000000" "Yes" "F"

"1000000000" "Yes" "F"

"1010000000" "Yes" "F"

"1000000000" "Yes" "F"

"1100000000" "Yes" "M"

"1000000000" "Yes" "F"

"1000000000" "Yes" "F"

"1000000000" "Yes" "M"

"1010000000" "Yes" "M"

"1000000000" "Yes" "M"

"1000000000" "Yes" "M"

"1000000000" "Yes" "M"

"1100000000" "Yes" "F"

"1000000000" "Yes" "F"

"1100000000" "Yes" "F"

"1000000000" "Yes" "M"

"1000000000" "Yes" "M"

"1000000000" "Yes" "M"

"1010000000" "Yes" "M"

"1100000000" "Yes" "M"

"1000000000" "Yes" "M"

"1000000000" "Yes" "M"

"1000000000" "Yes" "F"

"1000000000" "Yes" "M"

"1000000000" "Yes" "M"

"1000000000" "Yes" "M"

"1000000000" "Yes" "M"

"1000000000" "Yes" "M"

"1000000010" "Yes" "M"

"1000000000" "Yes" "M"

"1000000000" "Yes" "M"

"1010000000" "Yes" "M"

"1000000000" "Yes" "M"

"1000000000" "Yes" "M"

"1000000000" "Yes" "M"

"1000010000" "Yes" "M"

"1100000000" "Yes" "M"

"1000000000" "Yes" "M"

"1000000000" "Yes" "M"

"1000000000" "Yes" "M"

"1000000000" "Yes" "M"

"1000000000" "Yes" "M"

"1000000000" "Yes" "M"

"1000000000" "Yes" "M"

"1100000000" "Yes" "M"

"1000000000" "Yes" "M"

"1000000000" "Yes" "M"

"1000000000" "Yes" "M"

"1000000000" "Yes" "F"

"1000000000" "Yes" "M"

"1000000000" "Yes" "M"

"1000000000" "Yes" "F"

"1000000000" "Yes" "M"

"1000000000" "Yes" "M"

"1000000000" "Yes" "M"

"1000000000" "Yes" "M"

"1000000000" "Yes" "M"

"1000000000" "Yes" "M"

"1000000000" "Yes" "M"

"1010000000" "Yes" "M"

"1000000000" "Yes" "M"

"1000000000" "Yes" "M"

"1000000000" "Yes" "M"

"1000000000" "Yes" "M"

"1000000000" "Yes" "M"

"1000000000" "Yes" "M"

"1000000000" "Yes" "M"

"1000000000" "Yes" "M"

"1000000000" "Yes" "M"

"1000000000" "Yes" "M"

"1000000000" "Yes" "M"

"1000000000" "Yes" "M"

"1000000000" "Yes" "M"

"1000000000" "Yes" "M"

"1000000000" "Yes" "M"

"1000000000" "Yes" "M"

"1000000000" "Yes" "M"

"1000000000" "Yes" "M"

"1000000000" "Yes" "M"

"1000000000" "Yes" "M"

"1000000000" "Yes" "M"

"1000000000" "Yes" "M"

"1000000000" "Yes" "M"

"1000000000" "Yes" "M"

"1000000000" "Yes" "M"

"1000000000" "Yes" "M"

"1000000000" "Yes" "M"

"1000000000" "Yes" "M"

"1000000000" "Yes" "M"

"1000000000" "Yes" "M"

"1000000000" "Yes" "M"

"1000000000" "Yes" "M"

"1000000000" "Yes" "M"

"1000000000" "Yes" "M"

"1000000000" "Yes" "M"

"1000000000" "Yes" "M"

"1000000000" "Yes" "M"

"1000000000" "Yes" "M"

"1000000000" "Yes" "M"

"1000000000" "Yes" "M"

"1000000000" "Yes" "M"

"1000000000" "Yes" "M"

"1000000000" "Yes" "M"

"1000000000" "Yes" "M"

"1000000000" "Yes" "M"

"1000000000" "Yes" "M"

"1000000000" "Yes" "M"

"1000000000" "Yes" "M"

"1000000000" "Yes" "M"

"1000000000" "Yes" "M"

"1000000000" "Yes" "F"

"1000000000" "Yes" "M"

"1000000000" "Yes" "M"

"1100000000" "Yes" "M"

"1000000000" "Yes" "M"

"1000000000" "Yes" "M"

"1000000000" "Yes" "M"

"1000000000" "Yes" "F"

"1000000000" "Yes" "M"

"1000000000" "Yes" "M"

"1100000000" "Yes" "M"

"1000000000" "Yes" "M"

"1100000000" "Yes" "M"

"1000000000" "Yes" "F"

"1000000000" "Yes" "F"

"1000000000" "Yes" "F"

"1000000000" "Yes" "F"

"1000000000" "Yes" "M"

"1000000000" "Yes" "F"

"1000000000" "Yes" "F"

"1000000000" "Yes" "F"

"1000000000" "Yes" "F"

"1000000000" "Yes" "F"

"1000000000" "Yes" "M"

"1000000000" "Yes" "F"

"1000000000" "Yes" "M"

"1000000000" "Yes" "F"

"1000000000" "Yes" "F"

"1000000000" "Yes" "F"

"1000000000" "Yes" "M"

"1000000000" "Yes" "F"

"1000000000" "Yes" "F"

"1000000000" "Yes" "M"

"1000000000" "Yes" "F"

"1000000000" "Yes" "F"

"1000000000" "Yes" "M"

"1000000000" "Yes" "M"

"1000000000" "Yes" "F"

"1000000000" "Yes" "F"

"1000000000" "Yes" "F"

"1000000000" "Yes" "F"

"1000000000" "Yes" "F"

"1000000000" "Yes" "F"

"1000000000" "Yes" "F"

"1000000000" "Yes" "F"

"1000000000" "Yes" "F"

"1010000000" "Yes" "F"

"1000000000" "Yes" "F"

"1000000000" "Yes" "F"

"1000000000" "Yes" "F"

"1000000000" "Yes" "F"

"1000000000" "Yes" "F"

"1000000000" "Yes" "F"

"1000000000" "Yes" "F"

"1010000000" "Yes" "F"

"1000000000" "Yes" "F"

"1000000000" "Yes" "F"

"1000000000" "Yes" "F"

"1000000000" "Yes" "F"

"1100000000" "Yes" "F"

"1000000000" "Yes" "F"

"1000000000" "Yes" "F"

"1000000000" "Yes" "F"

"1100000000" "Yes" "F"

"1100000000" "Yes" "F"

"1000000000" "Yes" "F"

"1000000000" "Yes" "F"

"1000000000" "Yes" "F"

"1000000000" "Yes" "F"

"1000000000" "Yes" "F"

"1100000000" "Yes" "F"

"1000000000" "Yes" "F"

"1000000000" "Yes" "F"

"1000000000" "Yes" "F"

"1010000000" "Yes" "F"

"1000000000" "Yes" "F"

"1010000000" "Yes" "F"

"1000000000" "Yes" "F"

"1000000000" "Yes" "F"

"1000000000" "Yes" "F"

"1000000000" "Yes" "F"

"1000000000" "Yes" "F"

"1000000000" "Yes" "F"

"1000000000" "Yes" "F"

"1010000000" "Yes" "F"

"1100000000" "Yes" "F"

"1000000000" "Yes" "F"

"1000000000" "Yes" "F"

"1000000000" "Yes" "M"

"1000000000" "Yes" "M"

"1000000000" "Yes" "M"

"1000000000" "Yes" "M"

"1000000000" "Yes" "M"

"1000000000" "Yes" "M"

"1000000000" "Yes" "F"

"1000000000" "Yes" "F"

"1000000000" "Yes" "M"

"1000000000" "Yes" "M"

"1100000000" "Yes" "M"

"1000000000" "Yes" "M"

"1000000000" "Yes" "M"

"1100000000" "Yes" "M"

"1000000000" "Yes" "M"

"1000000000" "Yes" "M"

"1000000000" "Yes" "M"

"1000000000" "Yes" "M"

"1000000000" "Yes" "M"

"1000000000" "Yes" "M"

"1000000000" "Yes" "F"

"1000000000" "Yes" "M"

"1000000000" "Yes" "M"

"1000000000" "Yes" "M"

"1000000000" "Yes" "M"

"1000000000" "Yes" "F"

"1001100000" "Yes" "M"

"1000000000" "Yes" "M"

"1000000000" "Yes" "M"

"1000000000" "Yes" "M"

"1000000000" "Yes" "M"

"1000000000" "Yes" "M"

"1000000000" "Yes" "M"

"1000000000" "Yes" "M"

"1000000000" "Yes" "M"

"1000000000" "Yes" "M"

"1000000000" "Yes" "M"

"1000000000" "Yes" "M"

"1000000000" "Yes" "M"

"1000000000" "Yes" "M"

"1000000000" "Yes" "M"

"1000000000" "Yes" "M"

"1000000000" "Yes" "M"

"1000000000" "Yes" "M"

"1000000000" "Yes" "M"

"1000000000" "Yes" "M"

"1000000000" "Yes" "M"

"1000000000" "Yes" "M"

"1000000000" "Yes" "M"

"1000000000" "Yes" "M"

"1000000000" "Yes" "M"

"1000000000" "Yes" "M"

"1000000000" "Yes" "M"

"1000000000" "Yes" "M"

"1000000000" "Yes" "M"

"1000000000" "Yes" "M"

"1000000000" "Yes" "M"

"1000000000" "Yes" "M"

"1000000000" "Yes" "M"

"1000000000" "Yes" "M"

"1000000000" "Yes" "M"

"1000000000" "Yes" "M"

"1000000000" "Yes" "M"

"1000000000" "Yes" "M"

"1000000000" "Yes" "M"

"1000000000" "Yes" "F"

"1100000000" "Yes" "M"

"1000000000" "Yes" "M"

"1100000000" "Yes" "M"

"1000000000" "Yes" "M"

"1010000000" "Yes" "M"

"1000000000" "Yes" "M"

"1000000000" "Yes" "M"

"1000000000" "Yes" "M"

"1000000000" "Yes" "M"

"1000000000" "Yes" "M"

"1000000000" "Yes" "M"

"1000000000" "Yes" "M"

"1000000000" "Yes" "M"

"1000000000" "Yes" "M"

"1000000000" "Yes" "M"

"1000000000" "Yes" "F"

"1000000000" "Yes" "M"

"1000000000" "Yes" "M"

"1000000000" "Yes" "M"

"1000000000" "Yes" "M"

"1000000000" "Yes" "M"

"1000000000" "Yes" "M"

"1000000000" "Yes" "M"

"1000000000" "Yes" "M"

"1000000000" "Yes" "M"

"1000000000" "Yes" "M"

"1000000000" "Yes" "M"

"1000000000" "Yes" "M"

"1000000000" "Yes" "M"

"1000000000" "Yes" "M"

"1000000000" "Yes" "M"

"1000000000" "Yes" "M"

"1000000000" "Yes" "M"

"1000000000" "Yes" "M"

"1000000000" "Yes" "F"

"1000000000" "Yes" "F"

"1000000000" "Yes" "F"

"1100000000" "Yes" "F"

"1000000000" "Yes" "F"

"1000000000" "Yes" "F"

"1000000000" "Yes" "F"

"1000000000" "Yes" "F"

"1000000000" "Yes" "F"

"1001000000" "Yes" "F"

"1000000000" "Yes" "F"

"1000000000" "Yes" "F"

"1000000000" "Yes" "F"

"1000000000" "Yes" "F"

"1000000000" "Yes" "F"

"1000000000" "Yes" "F"

"1000000000" "Yes" "F"

"1000000000" "Yes" "F"

"1000000000" "Yes" "F"

"1000000000" "Yes" "F"

"1000000000" "Yes" "F"

"1000000000" "Yes" "F"

"1000000000" "Yes" "F"

"1000000000" "Yes" "F"

"1000000000" "Yes" "F"

"1000000000" "Yes" "F"

"1000000000" "Yes" "F"

"1000000000" "Yes" "F"

"1000000000" "Yes" "F"

"1000000000" "Yes" "F"

"1000000000" "Yes" "F"

"1000000000" "Yes" "F"

"1000000000" "Yes" "F"

"1000000000" "Yes" "F"

"1000000000" "Yes" "F"

"1000000000" "Yes" "F"

"1000000000" "Yes" "F"

"1000000000" "Yes" "F"

"1000000000" "Yes" "F"

"1000000000" "Yes" "F"

"1000000000" "Yes" "F"

"1000000000" "Yes" "F"

"1010000000" "Yes" "F"

"1000000000" "Yes" "F"

"1000000000" "Yes" "F"

"1000000000" "Yes" "F"

"1000000000" "Yes" "F"

"1000000000" "Yes" "F"

"1000000000" "Yes" "F"

"1000000000" "Yes" "F"

"1000000000" "Yes" "F"

"1000000000" "Yes" "F"

"1000000000" "Yes" "F"

"1100000000" "Yes" "F"

"1000000000" "Yes" "F"

"1000000000" "Yes" "F"

"1000000000" "Yes" "F"

"1000000000" "Yes" "F"

"1000000000" "Yes" "F"

"1000000000" "Yes" "F"

"1100000000" "Yes" "F"

"1000000000" "Yes" "F"

"1010000000" "Yes" "F"

"1000000000" "Yes" "F"

"1000000000" "Yes" "F"

"1000000000" "Yes" "F"

"1000000000" "Yes" "F"

"1000000000" "Yes" "F"

"1100000000" "Yes" "F"

"1000000000" "Yes" "F"

"1000000000" "Yes" "F"

"1000000000" "Yes" "F"

"1000000000" "Yes" "F"

"1000000000" "Yes" "F"

"1000000000" "Yes" "F"

"1000000000" "Yes" "M"

"1000000000" "Yes" "F"

"1000000000" "Yes" "F"

"1000000000" "Yes" "M"

"1000000000" "Yes" "M"

"1000000000" "Yes" "M"

"1000000000" "Yes" "F"

"1000000000" "Yes" "M"

"1000000000" "Yes" "M"

"1000000000" "Yes" "M"

"1000000000" "Yes" "M"

"1000000000" "Yes" "M"

"1010000000" "Yes" "F"

"1000000000" "Yes" "M"

"1000000000" "Yes" "M"

"1000000000" "Yes" "M"

"1000000000" "Yes" "M"

"1000000000" "Yes" "M"

"1000000000" "Yes" "M"

"1000000000" "Yes" "M"

"1000000000" "Yes" "F"

"1000000000" "Yes" "M"

"1000000000" "Yes" "M"

"1000000000" "Yes" "M"

"1000000000" "Yes" "F"

"1000000000" "Yes" "M"

"1000000000" "Yes" "F"

"1000000000" "Yes" "M"

"1000000000" "Yes" "M"

"1000000000" "Yes" "M"

"1000000000" "Yes" "M"

"1000000000" "Yes" "M"

"1000000000" "Yes" "M"

"1000000000" "Yes" "M"

"1000000000" "Yes" "M"

"1000000000" "Yes" "M"

"1000000000" "Yes" "M"

"1000000000" "Yes" "M"

"1000000000" "Yes" "M"

"1000000000" "Yes" "M"

"1000000000" "Yes" "M"

"1000000000" "Yes" "F"

"1000000000" "Yes" "M"

"1000000000" "Yes" "M"

"1000000000" "Yes" "M"

"1000000000" "Yes" "M"

"1000000000" "Yes" "F"

"1000000000" "Yes" "M"

"1000000000" "Yes" "M"

"1000000000" "Yes" "M"

"1000000000" "Yes" "F"

"1000000000" "Yes" "M"

"1000000000" "Yes" "M"

"1000000000" "Yes" "M"

"1000000000" "Yes" "M"

"1100000000" "Yes" "M"

"1000000000" "Yes" "M"

"1000000000" "Yes" "M"

"1010000000" "Yes" "M"

"1000000000" "Yes" "M"

"1000000000" "Yes" "F"

"1000000000" "Yes" "M"

"1000000000" "Yes" "M"

"1000000000" "Yes" "F"

"1000000000" "Yes" "M"

"1100000000" "Yes" "F"

"1000000000" "Yes" "M"

"1000000000" "Yes" "M"

"1000000000" "Yes" "M"

"1000000000" "Yes" "F"

"1010000000" "Yes" "F"

"1000000000" "Yes" "M"

"1000000000" "Yes" "M"

"1000000000" "Yes" "M"

"1000000000" "Yes" "M"

"1100000000" "Yes" "M"

"1000000000" "Yes" "M"

"1000000000" "Yes" "M"

"1000000000" "Yes" "M"

"1000000000" "Yes" "M"

"1000000000" "Yes" "M"

"1000000000" "Yes" "M"

"1000000000" "Yes" "M"

"1000000000" "Yes" "M"

"1000000000" "Yes" "M"

"1000000000" "Yes" "M"

"1000000000" "Yes" "F"

"1000000000" "Yes" "M"

"1000000000" "Yes" "M"

"1000000000" "Yes" "F"

"1000000000" "Yes" "F"

"1000000000" "Yes" "M"

"1000000000" "Yes" "M"

"1000000000" "Yes" "M"

"1000000000" "Yes" "M"

"1000000000" "Yes" "M"

"1000000000" "Yes" "M"

"1000000000" "Yes" "M"

"1000000000" "Yes" "M"

"1000000000" "Yes" "M"

"1000000000" "Yes" "F"

"1000000000" "Yes" "M"

"1000000000" "Yes" "M"

"1000000000" "Yes" "F"

"1000000000" "Yes" "F"

"1000000000" "Yes" "M"

"1000000000" "Yes" "M"

"1000000000" "Yes" "M"

"1000000000" "Yes" "M"

"1000000000" "Yes" "M"

"1000000000" "Yes" "M"

"1000000000" "Yes" "M"

"1000000000" "Yes" "M"

"1000000000" "Yes" "F"

"1000000000" "Yes" "M"

"1000000000" "Yes" "F"

"1000000000" "Yes" "F"

"1000000000" "Yes" "M"

"1000000000" "Yes" "M"

"1000000000" "Yes" "M"

"1000000000" "Yes" "M"

"1000000000" "Yes" "M"

"1000000000" "Yes" "F"

"1000000000" "Yes" "F"

"1000000000" "Yes" "M"

"1000000000" "Yes" "M"

"1000000000" "Yes" "M"

"1000000000" "Yes" "M"

"1100000000" "Yes" "M"

"1000000000" "Yes" "M"

"1000000000" "Yes" "M"

"1000000000" "Yes" "M"

"1100000000" "Yes" "M"

"1000000000" "Yes" "M"

"1000000000" "Yes" "M"

"1000000000" "Yes" "F"

"1000000000" "Yes" "M"

"1000000000" "Yes" "F"

"1000000000" "Yes" "M"

"1000000000" "Yes" "F"

"1000000000" "Yes" "M"

"1000000000" "Yes" "M"

"1000000000" "Yes" "M"

"1000000000" "Yes" "M"

"1000000000" "Yes" "M"

"1000000000" "Yes" "M"

"1000000000" "Yes" "M"

"1000000000" "Yes" "M"

"1000000000" "Yes" "F"

"1000000000" "Yes" "M"

"1000000000" "Yes" "F"

"1000000000" "Yes" "M"

"1000000000" "Yes" "M"

"1000000000" "Yes" "M"

"1000000000" "Yes" "M"

"1000000000" "Yes" "M"

"1000000000" "Yes" "M"

"1000000000" "Yes" "M"

"1000000000" "Yes" "M"

"1000000000" "Yes" "F"

"1000000000" "Yes" "M"

"1000000000" "Yes" "M"

"1000000000" "Yes" "M"

"1000000000" "Yes" "M"

"1000000000" "Yes" "M"

"1000000000" "Yes" "M"

"1000000000" "Yes" "F"

"1000000000" "Yes" "M"

"1000000000" "Yes" "M"

"1000000000" "Yes" "M"

"1000000000" "Yes" "M"

"1000000000" "Yes" "M"

"1000000000" "Yes" "M"

"1000000000" "Yes" "F"

"1000000000" "Yes" "M"

"1000000000" "Yes" "F"

"1100000000" "Yes" "F"

"1000000000" "Yes" "F"

"1000000000" "Yes" "F"

"1000000000" "Yes" "F"

"1000000000" "Yes" "F"

"1000000000" "Yes" "F"

"1000000000" "Yes" "F"

"1000000000" "Yes" "F"

"1000000000" "Yes" "F"

"1000000000" "Yes" "F"

"1000000000" "Yes" "F"

"1000000000" "Yes" "F"

"1000000000" "Yes" "F"

"1001000000" "Yes" "F"

"1000000000" "Yes" "F"

"1100000000" "Yes" "F"

"1000000000" "Yes" "F"

"1000000000" "Yes" "F"

"1000000000" "Yes" "F"

"1000000000" "Yes" "F"

"1000000000" "Yes" "F"

"1000000000" "Yes" "F"

"1000000000" "Yes" "F"

"1100000000" "Yes" "F"

"1000000000" "Yes" "F"

"1100000000" "Yes" "F"

"1000000000" "Yes" "F"

"1000000000" "Yes" "F"

"1000000000" "Yes" "F"

"1000000000" "Yes" "F"

"1100000000" "Yes" "F"

"1010000000" "Yes" "F"

"1000000000" "Yes" "F"

"1000000000" "Yes" "F"

"1000000000" "Yes" "F"

"1010000000" "Yes" "F"

"1100000000" "Yes" "F"

"1000000000" "Yes" "F"

"1010000000" "Yes" "F"

"1000000000" "Yes" "F"

"1000000000" "Yes" "F"

"1000000000" "Yes" "F"

"1000000000" "Yes" "F"

"1000000000" "Yes" "F"

"1000000000" "Yes" "F"

"1000000000" "Yes" "F"

"1000000000" "Yes" "F"

"1000000000" "Yes" "F"

"1000000000" "Yes" "F"

"1100000000" "Yes" "F"

"1000000000" "Yes" "F"

"1000000000" "Yes" "F"

"1000000000" "Yes" "F"

"1010000000" "Yes" "F"

"1000000000" "Yes" "F"

"1010000000" "Yes" "F"

"1000000000" "Yes" "F"

"1010000000" "Yes" "F"

"1000000000" "Yes" "F"

"1100000000" "Yes" "F"

"1000000000" "Yes" "F"

"1010000000" "Yes" "F"

"1000000000" "Yes" "F"

"1000000000" "Yes" "F"

"1000000000" "Yes" "F"

"1010000000" "Yes" "F"

"1000000000" "Yes" "F"

"1010000000" "Yes" "F"

"1000000000" "Yes" "F"

"1010000000" "Yes" "F"

"1100000000" "Yes" "F"

"1100000000" "Yes" "F"

"1000000000" "Yes" "F"

"1000000000" "Yes" "F"

"1000000000" "Yes" "F"

"1000000000" "Yes" "F"

"1000000000" "Yes" "F"

"1000000000" "Yes" "F"

"1000000000" "Yes" "F"

"1000000000" "Yes" "F"

"1000000000" "Yes" "F"

"1000000000" "Yes" "F"

"1000000000" "Yes" "F"

"1000000000" "Yes" "F"

"1000000000" "Yes" "F"

"1000000000" "Yes" "F"

"1000000000" "Yes" "F"

"1000000000" "Yes" "F"

"1000000000" "Yes" "F"

"1001000000" "Yes" "F"

"1000000000" "Yes" "F"

"1000000000" "Yes" "F"

"1000000000" "Yes" "F"

"1000000000" "Yes" "F"

"1000000000" "Yes" "F"

"1000000000" "Yes" "F"

"1000000000" "Yes" "F"

"1000000000" "Yes" "F"

"1000000000" "Yes" "F"

"1000000000" "Yes" "F"

"1000000000" "Yes" "F"

"1000000000" "Yes" "F"

"1010000000" "Yes" "F"

"1000000000" "Yes" "F"

"1000000000" "Yes" "F"

"1000000000" "Yes" "F"

"1000000000" "Yes" "F"

"1000000000" "Yes" "F"

"1000000000" "Yes" "F"

"1000000000" "Yes" "F"

"1000000000" "Yes" "F"

"1000000000" "Yes" "F"

"1000000000" "Yes" "F"

"1000000000" "Yes" "F"

"1000000000" "Yes" "F"

"1000000000" "Yes" "F"

"1000000000" "Yes" "F"

"1000000000" "Yes" "F"

"1000000000" "Yes" "F"

"1000000000" "Yes" "F"

"1000000000" "Yes" "F"

"1000000000" "Yes" "F"

"1000000000" "Yes" "F"

"1000000000" "Yes" "F"

"1000000000" "Yes" "F"

"1000000000" "Yes" "F"

"1000000000" "Yes" "F"

"1000000000" "Yes" "F"

"1000000000" "Yes" "F"

"1000000000" "Yes" "F"

"1000000000" "Yes" "F"

"1000000000" "Yes" "F"

"1000000000" "Yes" "F"

"1000000000" "Yes" "F"

"1000000000" "Yes" "F"

"1000000000" "Yes" "F"

"1000000000" "Yes" "F"

"1000000000" "Yes" "F"

"1000000000" "Yes" "F"

"1000000000" "Yes" "F"

"1000000000" "Yes" "F"

"1000000000" "Yes" "F"

"1100000000" "Yes" "F"

"1000000000" "Yes" "F"

"1100000000" "Yes" "F"

"1000000000" "Yes" "F"

"1000000000" "Yes" "F"

"1000000000" "Yes" "F"

"1000000000" "Yes" "F"

"1000000000" "Yes" "M"

"1000000000" "Yes" "M"

"1000000000" "Yes" "M"

"1000000000" "Yes" "M"

"1000000000" "Yes" "M"

"1000000000" "Yes" "M"

"1000000000" "Yes" "M"

"1000000000" "Yes" "M"

"1000000000" "Yes" "M"

"1000000000" "Yes" "M"

"1000000000" "Yes" "M"

"1000000000" "Yes" "M"

"1000000000" "Yes" "M"

"1000000000" "Yes" "M"

"1100000000" "Yes" "M"

"1000000000" "Yes" "M"

"1000000000" "Yes" "M"

"1000000000" "Yes" "M"

"1000000000" "Yes" "M"

"1000000000" "Yes" "M"

"1000000000" "Yes" "M"

"1000000000" "Yes" "M"

"1000000000" "Yes" "M"

"1000000000" "Yes" "M"

"1000000000" "Yes" "M"

"1000000000" "Yes" "M"

"1000000000" "Yes" "M"

"1000000000" "Yes" "M"

"1000000000" "Yes" "M"

"1000001000" "Yes" "M"

"1000000000" "Yes" "M"

"1000000000" "Yes" "M"

"1000000000" "Yes" "M"

"1000000000" "Yes" "M"

"1000000000" "Yes" "M"

"1000000000" "Yes" "M"

"1000000000" "Yes" "M"

"1000000000" "Yes" "M"

"1000000000" "Yes" "M"

"1000000000" "Yes" "M"

"1000000000" "Yes" "M"

"1000000000" "Yes" "M"

"1100000000" "Yes" "M"

"1000000000" "Yes" "M"

"1000000000" "Yes" "M"

"1000000000" "Yes" "M"

"1000000000" "Yes" "M"

"1000000000" "Yes" "M"

"1000000000" "Yes" "M"

"1000000000" "Yes" "M"

"1001000000" "Yes" "M"

"1000000000" "Yes" "M"

"1000000000" "Yes" "M"

"1000000000" "Yes" "M"

"1000000000" "Yes" "M"

"1000000000" "Yes" "M"

"1000000000" "Yes" "M"

"1000000000" "Yes" "M"

"1000000000" "Yes" "M"

"1000000000" "Yes" "M"

"1000000000" "Yes" "M"

"1000000000" "Yes" "M"

"1000000000" "Yes" "M"

"1000000000" "Yes" "M"

"1000000000" "Yes" "M"

"1000000000" "Yes" "M"

"1000000000" "Yes" "M"

"1000000000" "Yes" "M"

"1000000000" "Yes" "M"

"1000000000" "Yes" "M"

"1000000000" "Yes" "M"

"1000000000" "Yes" "M"

"1000000000" "Yes" "M"

"1000000000" "Yes" "M"

"1000000000" "Yes" "M"

"1000000000" "Yes" "M"

"1000000000" "Yes" "M"

"1000000000" "Yes" "M"

"1000000000" "Yes" "M"

"1001000000" "Yes" "M"

"1000000000" "Yes" "M"

"1000000000" "Yes" "M"

"1000000000" "Yes" "M"

"1000000000" "Yes" "M"

"1000000000" "Yes" "M"

"1000000000" "Yes" "M"

"1100000000" "Yes" "M"

"1000000000" "Yes" "M"

"1000000000" "Yes" "M"

"1000000000" "Yes" "M"

"1000000000" "Yes" "M"

"1000000000" "Yes" "M"

"1000000000" "Yes" "M"

"1000000000" "Yes" "M"

"1000000000" "Yes" "M"

"1000000000" "Yes" "M"

"1000000000" "Yes" "M"

"1000000000" "Yes" "M"

"1000000000" "Yes" "M"

"1000000000" "Yes" "M"

"1000000000" "Yes" "M"

"1000000000" "Yes" "M"

"1000000000" "Yes" "M"

"1000000000" "Yes" "M"

"1000000000" "Yes" "M"

"1000000000" "Yes" "M"

"1000000000" "Yes" "M"

"1000000000" "Yes" "M"

"1000000000" "Yes" "M"

"1000000000" "Yes" "M"

"1000000000" "Yes" "M"

"1000000000" "Yes" "M"

"1000000000" "Yes" "M"

"1000000000" "Yes" "M"

"1000000000" "Yes" "M"

"1000000000" "Yes" "M"

"1000000000" "Yes" "M"

"1000000000" "Yes" "M"

"1000000000" "Yes" "M"

"1000000000" "Yes" "M"

"1000000000" "Yes" "M"

"1000000000" "Yes" "M"

"1000000000" "Yes" "M"

"1000000000" "Yes" "M"

"1000000000" "Yes" "F"

"1000000000" "Yes" "F"

"1000000000" "Yes" "M"

"1000000000" "Yes" "M"

"1000000000" "Yes" "M"

"1000000000" "Yes" "M"

"1000000000" "Yes" "M"

"1000000000" "Yes" "M"

"1000000000" "Yes" "M"

"1000000000" "Yes" "M"

"1000000000" "Yes" "M"

"1010000000" "Yes" "M"

"1000000000" "Yes" "M"

"1010000000" "Yes" "F"

"1000000000" "Yes" "F"

"1000000000" "Yes" "M"

"1000000000" "Yes" "M"

"1000000000" "Yes" "M"

"1000000000" "Yes" "M"

"1000000000" "Yes" "M"

"1000000000" "Yes" "M"

"1000000000" "Yes" "M"

"1000000000" "Yes" "F"

"1000000000" "Yes" "F"

"1000000000" "Yes" "M"

"1000000000" "Yes" "F"

"1000000000" "Yes" "M"

"1000000000" "Yes" "M"

"1100000000" "Yes" "M"

"1000000000" "Yes" "M"

"1000000000" "Yes" "M"

"1000000000" "Yes" "M"

"1000000000" "Yes" "M"

"1000000000" "Yes" "M"

"1000000000" "Yes" "M"

"1000000000" "Yes" "M"

"1001000000" "Yes" "M"

"1100000000" "Yes" "M"

"1000000000" "Yes" "F"

"1000000000" "Yes" "M"

"1000000000" "Yes" "M"

"1000000000" "Yes" "F"

"1000000000" "Yes" "M"

"1000000000" "Yes" "F"

"1000000000" "Yes" "M"

"1000000000" "Yes" "M"

"1000000000" "Yes" "F"

"1000000100" "Yes" "M"

"1000000000" "Yes" "F"

"1000000000" "Yes" "M"

"1000000000" "Yes" "M"

"1000000000" "Yes" "M"

"1000000000" "Yes" "M"

"1000000000" "Yes" "M"

"1000000000" "Yes" "M"

"1100000000" "Yes" "M"

"1001000000" "Yes" "M"

"1000000000" "Yes" "F"

"1000000000" "Yes" "M"

"1100000000" "Yes" "F"

"1010000000" "Yes" "M"

"1000000000" "Yes" "M"

"1000000000" "Yes" "M"

"1000000000" "Yes" "M"

"1000000000" "Yes" "M"

"1000000000" "Yes" "M"

"1000000000" "Yes" "F"

"1000000000" "Yes" "M"

"1000000000" "Yes" "F"

"1000000000" "Yes" "M"

"1000000000" "Yes" "F"

"1000000000" "Yes" "F"

"1000000000" "Yes" "M"

"1000000000" "Yes" "M"

"1000000000" "Yes" "M"

"1000000000" "Yes" "M"

"1010000000" "Yes" "F"

"1000000000" "Yes" "M"

"1000000000" "Yes" "F"

"1000000000" "Yes" "F"

"1000000000" "Yes" "M"

"1000000000" "Yes" "M"

"1010000000" "Yes" "M"

"1000000000" "Yes" "F"

"1000000000" "Yes" "M"

"1000000000" "Yes" "M"

"1000000000" "Yes" "F"

"1000000000" "Yes" "F"

"1000000000" "Yes" "F"

"1000000000" "Yes" "M"

"1000000000" "Yes" "M"

"1000000000" "Yes" "M"

"1000000000" "Yes" "M"

"1000000000" "Yes" "M"

"1000000000" "Yes" "M"

"1000000000" "Yes" "F"

"1000000000" "Yes" "M"

"1000000000" "Yes" "M"

"1000000000" "Yes" "M"

"1000000000" "Yes" "M"

"1000000000" "Yes" "F"

"1000000000" "Yes" "M"

"1000000000" "Yes" "M"

"1000000000" "Yes" "F"

"1100000000" "Yes" "M"

"1000000000" "Yes" "M"

"1000000000" "Yes" "M"

"1000000000" "Yes" "M"

"1000000000" "Yes" "M"

"1010000000" "Yes" "M"

"1010000000" "Yes" "M"

"1100000000" "Yes" "F"

"1000000000" "Yes" "M"

"1000000000" "Yes" "M"

"1000000000" "Yes" "F"

"1100000000" "Yes" "M"

"1010000000" "Yes" "M"

"1010000000" "Yes" "M"

"1000000000" "Yes" "M"

"1010000000" "Yes" "M"

"1000010000" "Yes" "M"

"1100000000" "Yes" "M"

"1000000000" "Yes" "M"

"1000000000" "Yes" "M"

"1000000000" "Yes" "M"

"1100000000" "Yes" "M"

"1000000000" "Yes" "M"

"1000000000" "Yes" "M"

"1000000000" "Yes" "M"

"1000000000" "Yes" "F"

"1000000000" "Yes" "M"

"1000000000" "Yes" "M"

"1010000000" "Yes" "M"

"1000000000" "Yes" "M"

"1000000000" "Yes" "M"

"1010000000" "Yes" "M"

"1100000000" "Yes" "F"

"1000000000" "Yes" "M"

"1000000000" "Yes" "M"

"1000000000" "Yes" "M"

"1100000000" "Yes" "M"

"1010000000" "Yes" "M"

"1000000000" "Yes" "M"

"1000000000" "Yes" "F"

"1000000000" "Yes" "M"

"1000000000" "Yes" "F"

"1000000000" "Yes" "M"

"1000000000" "Yes" "M"

"1000000000" "Yes" "M"

"1000000000" "Yes" "M"

"1000000000" "Yes" "M"

"1000000000" "Yes" "M"

"1000000000" "Yes" "F"

"1000000000" "Yes" "M"

"1000000000" "Yes" "M"

"1000000000" "Yes" "M"

"1000000000" "Yes" "M"

"1000000000" "Yes" "M"

"1000000000" "Yes" "M"

"1000000000" "Yes" "M"

"1000000000" "Yes" "M"

"1000000000" "Yes" "M"

"1100000000" "Yes" "M"

"1000000000" "Yes" "M"

"1100000000" "Yes" "M"

"1000000000" "Yes" "M"

"1000000000" "Yes" "M"

"1000000000" "Yes" "M"

"1000000000" "Yes" "M"

"1000000000" "Yes" "M"

"1100000000" "Yes" "M"

"1000000000" "Yes" "M"

"1000000000" "Yes" "F"

"1000000000" "Yes" "M"

"1000000000" "Yes" "M"

"1000000000" "Yes" "M"

"1100000000" "Yes" "F"

"1000000000" "Yes" "F"

"1000000000" "Yes" "F"

"1010000000" "Yes" "F"

"1000000000" "Yes" "F"

"1000000000" "Yes" "F"

"1000000000" "Yes" "F"

"1100000000" "Yes" "F"

"1100000000" "Yes" "F"

"1100000000" "Yes" "F"

"1000000000" "Yes" "F"

"1100000000" "Yes" "F"

"1000000000" "Yes" "F"

"1000000000" "Yes" "F"

"1100000000" "Yes" "F"

"1000000000" "Yes" "F"

"1000000000" "Yes" "F"

"1000000000" "Yes" "F"

"1000000000" "Yes" "F"

"1000000000" "Yes" "F"

"1000000000" "Yes" "F"

"1000000000" "Yes" "F"

"1100000000" "Yes" "F"

"1000000000" "Yes" "F"

"1100000000" "Yes" "F"

"1000000000" "Yes" "F"

"1000000000" "Yes" "F"

"1000000000" "Yes" "F"

"1000000000" "Yes" "F"

"1000000000" "Yes" "F"

"1000000000" "Yes" "F"

"1000000000" "Yes" "F"

"1100000000" "Yes" "F"

"1000000000" "Yes" "F"

"1000000000" "Yes" "F"

"1000000000" "Yes" "F"

"1010000000" "Yes" "F"

"1000000000" "Yes" "F"

"1000000000" "Yes" "F"

"1000000000" "Yes" "F"

"1000000000" "Yes" "F"

"1000000000" "Yes" "F"

"1000000000" "Yes" "F"

"1000000000" "Yes" "F"

"1000000000" "Yes" "F"

"1100000000" "Yes" "F"

"1000000000" "Yes" "F"

"1000000000" "Yes" "F"

"1000000000" "Yes" "F"

"1000000000" "Yes" "F"

"1000000000" "Yes" "F"

"1000000000" "Yes" "M"

"1000000000" "Yes" "M"

"1000000000" "Yes" "M"

"1000000000" "Yes" "F"

"1000000000" "Yes" "M"

"1000000000" "Yes" "F"

"1000000000" "Yes" "M"

"1000000000" "Yes" "M"

"1000000000" "Yes" "M"

"1000000000" "Yes" "M"

"1000000000" "Yes" "M"

"1000000000" "Yes" "F"

"1000000000" "Yes" "F"

"1000000000" "Yes" "F"

"1000000000" "Yes" "M"

"1000000000" "Yes" "F"

"1000000000" "Yes" "F"

"1000000000" "Yes" "M"

"1000000000" "Yes" "F"

"1000000000" "Yes" "F"

"1000000000" "Yes" "F"

"1000000000" "Yes" "M"

"1000000000" "Yes" "M"

"1000000000" "Yes" "F"

"1000000000" "Yes" "M"

"1000000000" "Yes" "M"

"1000000000" "Yes" "M"

"1000000000" "Yes" "M"

"1000000000" "Yes" "M"

"1000000000" "Yes" "M"

"1000000000" "Yes" "F"

"1000000000" "Yes" "M"

"1000000000" "Yes" "F"

"1000000000" "Yes" "F"

"1000000000" "Yes" "M"

"1000000000" "Yes" "F"

"1000000000" "Yes" "F"

"1000000000" "Yes" "M"

"1000000000" "Yes" "F"

"1000000000" "Yes" "M"

"1000000000" "Yes" "F"

"1000000000" "Yes" "M"

"1000000000" "Yes" "F"

"1000000000" "Yes" "M"

"1000000000" "Yes" "F"

"1000000000" "Yes" "F"

"1000000000" "Yes" "F"

"1000000000" "Yes" "M"

"1000000000" "Yes" "M"

"1000000000" "Yes" "F"

"1000000000" "Yes" "M"

"1000000000" "Yes" "F"

"1000000000" "Yes" "M"

"1000000000" "Yes" "F"

"1000000000" "Yes" "M"

"1000000000" "Yes" "M"

"1000000000" "Yes" "M"

"1000000000" "Yes" "M"

"1000000000" "Yes" "M"

"1000000000" "Yes" "M"

"1000000000" "Yes" "F"

"1100000000" "Yes" "M"

"1000000000" "Yes" "M"

"1000000000" "Yes" "F"

"1000000000" "Yes" "M"

"1000000000" "Yes" "F"

"1000000000" "Yes" "M"

"1000000000" "Yes" "F"

"1000000000" "Yes" "F"

"1000000000" "Yes" "M"

"1000000000" "Yes" "M"

"1000000000" "Yes" "M"

"1000000000" "Yes" "M"

"1000000000" "Yes" "M"

"1000000000" "Yes" "F"

"1000000000" "Yes" "M"

"1000000000" "Yes" "M"

"1000000000" "Yes" "M"

"1000000000" "Yes" "M"

"1000000000" "Yes" "F"

"1000000000" "Yes" "F"

"1000000000" "Yes" "F"

"1000000000" "Yes" "M"

"1000000000" "Yes" "F"

"1000000000" "Yes" "F"

"1000000000" "Yes" "F"

"1000000000" "Yes" "M"

"1000000000" "Yes" "M"

"1000000000" "Yes" "F"

"1000000000" "Yes" "M"

"1000000000" "Yes" "M"

"1000000000" "Yes" "F"

"1000000000" "Yes" "M"

"1000000000" "Yes" "M"

"1000000000" "Yes" "M"

"1000000000" "Yes" "F"

"1000000000" "Yes" "F"

"1000000000" "Yes" "M"

"1000000000" "Yes" "M"

"1000000000" "Yes" "M"

"1000000000" "Yes" "F"

"1000000000" "Yes" "F"

"1000000000" "Yes" "F"

"1000000000" "Yes" "F"

"1000000000" "Yes" "F"

"1000000000" "Yes" "F"

"1000000000" "Yes" "F"

"1000000000" "Yes" "F"

"1000000000" "Yes" "F"

"1000000000" "Yes" "F"

"1000000000" "Yes" "F"

"1000000000" "Yes" "F"

"1000000000" "Yes" "F"

"1000000000" "Yes" "F"

"1000000000" "Yes" "F"

"1000000000" "Yes" "F"

"1000000000" "Yes" "F"

"1000000000" "Yes" "F"

"1000000000" "Yes" "F"

"1000000000" "Yes" "F"

"1000000000" "Yes" "F"

"1000000000" "Yes" "F"

"1000000000" "Yes" "F"

"1000000000" "Yes" "F"

"1000000000" "Yes" "M"

"1000000000" "Yes" "F"

"1000000000" "Yes" "M"

"1000000000" "Yes" "M"

"1000000000" "Yes" "M"

"1000000000" "Yes" "F"

"1000000000" "Yes" "M"

"1000000000" "Yes" "M"

"1000000000" "Yes" "M"

"1000000000" "Yes" "F"

"1000000000" "Yes" "M"

"1000011000" "Yes" "M"

"1000000000" "Yes" "M"

"1000000000" "Yes" "F"

"1000000000" "Yes" "M"

"1010000000" "Yes" "M"

"1000000000" "Yes" "M"

"1000000000" "Yes" "M"

"1000000000" "Yes" "M"

"1000000000" "Yes" "M"

"1000000000" "Yes" "M"

"1000000000" "Yes" "M"

"1000000000" "Yes" "F"

"1000000000" "Yes" "M"

"1000000000" "Yes" "M"

"1000000000" "Yes" "M"

"1000000000" "Yes" "M"

"1000000000" "Yes" "M"

"1000000000" "Yes" "M"

"1000000000" "Yes" "M"

"1000000000" "Yes" "M"

"1000000000" "Yes" "M"

"1000000000" "Yes" "M"

"1000000000" "Yes" "M"

"1000000000" "Yes" "F"

"1000000000" "Yes" "M"

"1000000000" "Yes" "F"

"1010000000" "Yes" "M"

"1000000000" "Yes" "M"

"1000000000" "Yes" "M"

"1000000000" "Yes" "F"

"1000000000" "Yes" "M"

"1000000000" "Yes" "M"

"1000000000" "Yes" "F"

"1000000000" "Yes" "M"

"1000000000" "Yes" "M"

"1000000000" "Yes" "M"

"1000000000" "Yes" "M"

"1000000000" "Yes" "M"

"1000000000" "Yes" "M"

"1010000000" "Yes" "M"

"1010000000" "Yes" "F"

"1000000000" "Yes" "M"

"1000000000" "Yes" "F"

"1010000000" "Yes" "M"

"1000000000" "Yes" "M"

"1000000000" "Yes" "M"

"1000000000" "Yes" "F"

"1000000000" "Yes" "M"

"1000000000" "Yes" "F"

"1100000000" "Yes" "M"

"1000000000" "Yes" "M"

"1000000000" "Yes" "M"

"1000000000" "Yes" "M"

"1000000000" "Yes" "M"

"1000000000" "Yes" "M"

"1000000000" "Yes" "M"

"1000000000" "Yes" "F"

"1000000000" "Yes" "F"

"1000000000" "Yes" "M"

"1000000000" "Yes" "M"

"1010000000" "Yes" "M"

"1010000000" "Yes" "F"

"1000000000" "Yes" "M"

"1000000000" "Yes" "M"

"1000000000" "Yes" "M"

"1010000000" "Yes" "M"

"1010000000" "Yes" "M"

"1010000000" "Yes" "M"

"1010000000" "Yes" "F"

"1000000000" "Yes" "M"

"1100000000" "Yes" "M"

"1100000000" "Yes" "F"

"1010000000" "Yes" "M"

"1000000000" "Yes" "F"

"1000000000" "Yes" "M"

"1000000000" "Yes" "M"

"1100000000" "Yes" "M"

"1100000000" "Yes" "M"

"1100000000" "Yes" "M"

"1100000000" "Yes" "M"

"1000000000" "Yes" "F"

"1000000000" "Yes" "M"

"1000000000" "Yes" "M"

"1000000000" "Yes" "M"

"1010000000" "Yes" "F"

"1000000000" "Yes" "F"

"1000000000" "Yes" "M"

"1000000000" "Yes" "M"

"1000000000" "Yes" "M"

"1000000000" "Yes" "F"

"1000000000" "Yes" "M"

"1000000000" "Yes" "M"

"1000000000" "Yes" "F"

"1000000000" "Yes" "F"

"1000000000" "Yes" "F"

"1000000000" "Yes" "M"

"1000000000" "Yes" "M"

"1000000000" "Yes" "F"

"1000000000" "Yes" "M"

"1000000000" "Yes" "M"

"1000000000" "Yes" "M"

"1000000000" "Yes" "M"

"1000000000" "Yes" "M"

"1000000000" "Yes" "F"

"1000000000" "Yes" "M"

"1000000000" "Yes" "F"

"1000000000" "Yes" "M"

"1000000000" "Yes" "M"

"1000000000" "Yes" "M"

"1000000000" "Yes" "M"

"1000000000" "Yes" "M"

"1000000000" "Yes" "M"

"1000000000" "Yes" "M"

"1000000000" "Yes" "M"

"1000000000" "Yes" "M"

"1000000000" "Yes" "M"

"1000000000" "Yes" "M"

"1000000000" "Yes" "M"

"1000000000" "Yes" "M"

"1000000000" "Yes" "M"

"1100000000" "Yes" "M"

"1000000000" "Yes" "M"

"1000000000" "Yes" "M"

"1000000000" "Yes" "M"

"1000000000" "Yes" "M"

"1000000000" "Yes" "M"

"1000000000" "Yes" "M"

"1000000000" "Yes" "F"

"1001000000" "Yes" "M"

"1000000000" "Yes" "M"

"1000000000" "Yes" "M"

"1000000000" "Yes" "M"

"1000000000" "Yes" "M"

"1000000000" "Yes" "M"

"1000000000" "Yes" "M"

"1000000000" "Yes" "M"

"1000000000" "Yes" "M"

"1000000000" "Yes" "M"

"1000000000" "Yes" "F"

"1000000000" "Yes" "M"

"1000000000" "Yes" "M"

"1000000000" "Yes" "M"

"1000000000" "Yes" "M"

"1010000000" "Yes" "M"

"1010000000" "Yes" "F"

"1000000000" "Yes" "M"

"1000000000" "Yes" "M"

"1000000000" "Yes" "M"

"1000000000" "Yes" "M"

"1000000000" "Yes" "M"

"1000000000" "Yes" "M"

"1000000000" "Yes" "M"

"1000000000" "Yes" "M"

"1000000000" "Yes" "M"

"1000000000" "Yes" "M"

"1100000000" "Yes" "M"

"1000000000" "Yes" "F"

"1000000000" "Yes" "M"

"1000000000" "Yes" "M"

"1101000000" "Yes" "M"

"1000000000" "Yes" "F"

"1000000000" "Yes" "M"

"1010000000" "Yes" "F"

"1000000000" "Yes" "M"

"1000000000" "Yes" "M"

"1000000000" "Yes" "F"

"1000000000" "Yes" "M"

"1000000000" "Yes" "F"

"1000000000" "Yes" "F"

"1000000000" "Yes" "F"

"1000000000" "Yes" "M"

"1000000000" "Yes" "M"

"1000000000" "Yes" "F"

"1000000000" "Yes" "F"

"1000000000" "Yes" "F"

"1000000000" "Yes" "F"

"1000000000" "Yes" "F"

"1000000000" "Yes" "F"

"1000000000" "Yes" "F"

"1000000000" "Yes" "F"

"1000000000" "Yes" "M"

"1000000000" "Yes" "F"

"1000000000" "Yes" "F"

"1000000000" "Yes" "M"

"1000000000" "Yes" "F"

"1000000000" "Yes" "M"

"1000000000" "Yes" "F"

"1000000000" "Yes" "M"

"1000000000" "Yes" "F"

"1000000000" "Yes" "F"

"1000000000" "Yes" "M"

"1000000000" "Yes" "F"

"1000000000" "Yes" "F"

"1000000000" "Yes" "M"

"1000000000" "Yes" "M"

"1000000000" "Yes" "M"

"1000000000" "Yes" "M"

"1000000000" "Yes" "M"

"1000000000" "Yes" "F"

"1000000000" "Yes" "M"

"1000000000" "Yes" "F"

"1000000000" "Yes" "M"

"1000000000" "Yes" "M"

"1000000000" "Yes" "M"

"1000000000" "Yes" "F"

"1000000000" "Yes" "M"

"1000000000" "Yes" "F"

"1000000000" "Yes" "F"

"1000000000" "Yes" "M"

"1000000000" "Yes" "F"

"1000000000" "Yes" "F"

"1000000000" "Yes" "M"

"1000000000" "Yes" "M"

"1000000000" "Yes" "M"

"1000000000" "Yes" "F"

"1000000000" "Yes" "F"

"1000000000" "Yes" "M"

"1000000000" "Yes" "M"

"1000000000" "Yes" "F"

"1000000000" "Yes" "F"

"1000000000" "Yes" "M"

"1000000000" "Yes" "F"

"1000000000" "Yes" "M"

"1010000000" "Yes" "F"

"1000000000" "Yes" "F"

"1000000000" "Yes" "F"

"1000000000" "Yes" "M"

"1100000000" "Yes" "F"

"1000000000" "Yes" "M"

"1100000000" "Yes" "M"

"1010000000" "Yes" "F"

"1100000000" "Yes" "F"

"1100000000" "Yes" "F"

"1000000000" "Yes" "M"

"1010000000" "Yes" "F"

"1000000000" "Yes" "M"

"1000000000" "Yes" "F"

"1000000000" "Yes" "F"

"1000000000" "Yes" "F"

"1000000000" "Yes" "M"

"1000000000" "Yes" "F"

"1000000000" "Yes" "M"

"1100000000" "Yes" "F"

"1000000000" "Yes" "M"

"1100000000" "Yes" "M"

"1000000000" "Yes" "F"

"1000000000" "Yes" "F"

"1100000000" "Yes" "F"

"1000000000" "Yes" "M"

"1000000000" "Yes" "M"

"1010000000" "Yes" "M"

"1100000000" "Yes" "M"

"1100000000" "Yes" "F"

"1000000000" "Yes" "M"

"1010000000" "Yes" "M"

"1000000000" "Yes" "F"

"1000000000" "Yes" "F"

"1000000000" "Yes" "M"

"1000000000" "Yes" "F"

"1000000000" "Yes" "F"

"1000000000" "Yes" "M"

"1100000000" "Yes" "F"

"1100000000" "Yes" "M"

"1000000000" "Yes" "M"

"1000000000" "Yes" "M"

"1000000000" "Yes" "M"

"1000000000" "Yes" "F"

"1000000000" "Yes" "M"

"1000000000" "Yes" "F"

"1100000000" "Yes" "M"

"1000000000" "Yes" "F"

"1000000000" "Yes" "F"

"1000000000" "Yes" "M"

"1000000000" "Yes" "F"

"1000000000" "Yes" "F"

"1000000000" "Yes" "M"

"1000000000" "Yes" "M"

"1000000000" "Yes" "M"

"1010000000" "Yes" "F"

"1000000000" "Yes" "F"

"1000000000" "Yes" "F"

"1000000000" "Yes" "M"

"1000000000" "Yes" "F"

"1000000000" "Yes" "M"

"1000000000" "Yes" "F"

"1000000000" "Yes" "M"

"1000000000" "Yes" "F"

"1000000000" "Yes" "M"

"1000000000" "Yes" "F"

"1000000000" "Yes" "F"

"1000000000" "Yes" "M"

"1000000000" "Yes" "M"

"1000000000" "Yes" "F"

"1000000000" "Yes" "F"

"1000000000" "Yes" "F"

"1000000000" "Yes" "F"

"1000000000" "Yes" "F"

"1000000000" "Yes" "F"

"1000000000" "Yes" "F"

"1000000000" "Yes" "F"

"1000000000" "Yes" "F"

"1000000000" "Yes" "F"

"1000000000" "Yes" "F"

"1000000000" "Yes" "M"

"1000000000" "Yes" "F"

"1000000000" "Yes" "F"

"1000000000" "Yes" "F"

"1000000000" "Yes" "F"

"1000000000" "Yes" "F"

"1000000000" "Yes" "M"

"1000000000" "Yes" "F"

"1000000000" "Yes" "F"

"1000000000" "Yes" "F"

"1000000000" "Yes" "F"

"1000000000" "Yes" "M"

"1000000000" "Yes" "F"

"1000000000" "Yes" "M"

"1000000000" "Yes" "M"

"1000000000" "Yes" "M"

"1000000000" "Yes" "F"

"1000000000" "Yes" "M"

"1000000000" "Yes" "F"

"1000000000" "Yes" "M"

"1000000000" "Yes" "F"

"1000000000" "Yes" "F"

"1000000000" "Yes" "F"

"1000000000" "Yes" "M"

"1000000000" "Yes" "F"

"1000000000" "Yes" "F"

"1000000000" "Yes" "F"

"1000000000" "Yes" "F"

"1000000000" "Yes" "F"

"1000000000" "Yes" "M"

"1000000000" "Yes" "F"

"1000000000" "Yes" "F"

"1000000000" "Yes" "F"

"1000000000" "Yes" "M"

"1000000000" "Yes" "M"

"1000000000" "Yes" "M"

"1000000000" "Yes" "F"

"1000000000" "Yes" "M"

"1000000000" "Yes" "M"

"1000000000" "Yes" "M"

"1000000000" "Yes" "F"

"1000000000" "Yes" "F"

"1000000000" "Yes" "M"

"1010000000" "Yes" "F"

"1100000000" "Yes" "M"

"1000000000" "Yes" "F"

"1000000000" "Yes" "F"

"1000000000" "Yes" "F"

"1100000000" "Yes" "F"

"1100000000" "Yes" "F"

"1100000000" "Yes" "M"

"1000000000" "Yes" "F"

"1000000000" "Yes" "F"

"1000000000" "Yes" "M"

"1000000000" "Yes" "F"

"1000000000" "Yes" "M"

"1000000000" "Yes" "M"

"1000000000" "Yes" "F"

"1000000000" "Yes" "M"

"1010000000" "Yes" "F"

"1000000000" "Yes" "M"

"1000000000" "Yes" "F"

"1000000000" "Yes" "M"

"1000000000" "Yes" "F"

"1000000000" "Yes" "F"

"1000000000" "Yes" "F"

"1100000000" "Yes" "F"

"1000000000" "Yes" "M"

"1100000000" "Yes" "F"

"1000000000" "Yes" "F"

"1000000000" "Yes" "M"

"1000000000" "Yes" "M"

"1000000000" "Yes" "M"

"1000000000" "Yes" "F"

"1000000000" "Yes" "M"

"1000000000" "Yes" "M"

"1000000000" "Yes" "M"

"1000000000" "Yes" "F"

"1000000000" "Yes" "M"

"1000000000" "Yes" "M"

"1000000000" "Yes" "M"

"1000000000" "Yes" "M"

"1000000000" "Yes" "M"

"1000000000" "Yes" "M"

"1000000000" "Yes" "M"

"1000000000" "Yes" "F"

"1100000000" "Yes" "F"

"1000000000" "Yes" "F"

"1000000000" "Yes" "F"

"1010001000" "Yes" "F"

"1100000000" "Yes" "M"

"1100000000" "Yes" "F"

"1010000000" "Yes" "M"

"1010000000" "Yes" "M"

"1010000000" "Yes" "M"

"1100000000" "Yes" "F"

"1010000000" "Yes" "F"

"1010000000" "Yes" "F"

"1000000000" "Yes" "M"

"1010000000" "Yes" "F"

"1010000000" "Yes" "M"

"1000000000" "Yes" "F"

"1100000000" "Yes" "M"

"1100000000" "Yes" "F"

"1000000000" "Yes" "F"

"1100000000" "Yes" "M"

"1100000000" "Yes" "F"

"1100000000" "Yes" "M"

"1000000000" "Yes" "M"

"1000000000" "Yes" "M"

"1100000000" "Yes" "F"

"1010000000" "Yes" "F"

"1110000000" "Yes" "M"

"1100000000" "Yes" "M"

"1010000000" "Yes" "F"

"1010000000" "Yes" "F"

"1000000000" "Yes" "M"

"1100000000" "Yes" "F"

"1100000000" "Yes" "F"

"1010000000" "Yes" "F"

"1000000000" "Yes" "M"

"1100000000" "Yes" "M"

"1010000000" "Yes" "M"

"1100000000" "Yes" "F"

"1100000000" "Yes" "F"

"1000000000" "Yes" "M"

"1100000000" "Yes" "M"

"1100000000" "Yes" "F"

"1000000000" "Yes" "F"

"1000000000" "Yes" "M"

"1000000000" "Yes" "M"

"1000000000" "Yes" "M"

"1100000000" "Yes" "M"

"1010000000" "Yes" "M"

"1100000000" "Yes" "M"

"1000000000" "Yes" "M"

"1100000000" "Yes" "M"

"1000000000" "Yes" "M"

"1010000000" "Yes" "F"

"1100000000" "Yes" "M"

"1000000000" "Yes" "M"

"1010000000" "Yes" "F"

"1100000000" "Yes" "M"

"1000000000" "Yes" "F"

"1100000000" "Yes" "F"

"1000000000" "Yes" "F"

"1100000000" "Yes" "F"

"1100000000" "Yes" "F"

"1100000000" "Yes" "M"

"1000000000" "Yes" "M"

"1100000000" "Yes" "F"

"1000000000" "Yes" "M"

"1010000000" "Yes" "F"

"1010000000" "Yes" "M"

"1010000000" "Yes" "F"

"1100000000" "Yes" "F"

"1000000000" "Yes" "M"

"1000000000" "Yes" "M"

"1100000000" "Yes" "M"

"1010000000" "Yes" "F"

"1010000000" "Yes" "F"

"1000000000" "Yes" "F"

"1000000000" "Yes" "M"

"1000000000" "Yes" "M"

"1000000000" "Yes" "F"

"1000000000" "Yes" "M"

"1000000000" "Yes" "F"

"1000000000" "Yes" "M"

"1000000000" "Yes" "F"

"1000000000" "Yes" "F"

"1000000000" "Yes" "M"

"1000000000" "Yes" "F"

"1100000000" "Yes" "F"

"1000000000" "Yes" "M"

"1000000000" "Yes" "M"

"1000000000" "Yes" "M"

"1000000000" "Yes" "F"

"1000000000" "Yes" "M"

"1000000000" "Yes" "M"

"1000000000" "Yes" "M"

"1000000000" "Yes" "M"

"1000000000" "Yes" "M"

"1000000000" "Yes" "F"

"1000000000" "Yes" "M"

"1000000000" "Yes" "M"

"1000000000" "Yes" "M"

"1000000000" "Yes" "M"

"1000000000" "Yes" "M"

"1000000000" "Yes" "F"

"1000000000" "Yes" "F"

"1000000000" "Yes" "F"

"1000000000" "Yes" "M"

"1000000000" "Yes" "M"

"1000000000" "Yes" "M"

"1000000000" "Yes" "M"

"1000000000" "Yes" "M"

"1000000000" "Yes" "M"

"1000000000" "Yes" "M"

"1000000000" "Yes" "M"

"1000000000" "Yes" "F"

"1000000000" "Yes" "M"

"1000000000" "Yes" "M"

"1000000000" "Yes" "M"

"1000000000" "Yes" "F"

"1000000000" "Yes" "F"

"1000000000" "Yes" "F"

"1000000000" "Yes" "F"

"1000000000" "Yes" "F"

"1000000000" "Yes" "F"

"1000000000" "Yes" "M"

"1000000000" "Yes" "M"

"1000000000" "Yes" "M"

"1000000000" "Yes" "F"

"1000000000" "Yes" "M"

"1000000000" "Yes" "M"

"1000000000" "Yes" "M"

"1000000000" "Yes" "M"

"1000000000" "Yes" "M"

"1000000000" "Yes" "M"

"1000000000" "Yes" "M"

"1000000000" "Yes" "F"

"1000000000" "Yes" "M"

"1001000000" "Yes" "M"

"1000000000" "Yes" "F"

"1000000000" "Yes" "F"

"1000000000" "Yes" "M"

"1000000000" "Yes" "M"

"1000000000" "Yes" "F"

"1000000000" "Yes" "M"

"1000000000" "Yes" "F"

"1000000000" "Yes" "M"

"1000000000" "Yes" "M"

"1000000000" "Yes" "F"

"1000000000" "Yes" "M"

"1000000000" "Yes" "M"

"1000000000" "Yes" "M"

"1000000000" "Yes" "M"

"1000000000" "Yes" "F"

"1000000000" "Yes" "F"

"1000000000" "Yes" "F"

"1000000000" "Yes" "F"

"1000000000" "Yes" "F"

"1000000000" "Yes" "M"

"1000000000" "Yes" "M"

"1000000000" "Yes" "M"

"1000000000" "Yes" "M"

"1000000000" "Yes" "F"

"1000000000" "Yes" "F"

"1000000000" "Yes" "M"

"1000000000" "Yes" "M"

"1000000000" "Yes" "M"

"1000000000" "Yes" "F"

"1000000000" "Yes" "M"

"1000000000" "Yes" "M"

"1000000000" "Yes" "M"

"1000000000" "Yes" "M"

"1000000000" "Yes" "M"

"1000000000" "Yes" "F"

"1000000000" "Yes" "F"

"1000000000" "Yes" "M"

"1000000000" "Yes" "M"

"1000000000" "Yes" "M"

"1000000000" "Yes" "F"

"1000000000" "Yes" "F"

"1000000000" "Yes" "F"

"1000000000" "Yes" "M"

"1000000000" "Yes" "M"

"1000000000" "Yes" "M"

"1000000000" "Yes" "M"

"1000000000" "Yes" "M"

"1000000000" "Yes" "M"

"1000000000" "Yes" "F"

"1000000000" "Yes" "M"

"1000000000" "Yes" "F"

"1000000000" "Yes" "M"

"1000000001" "Yes" "F"

"1000000000" "Yes" "F"

"1000000000" "Yes" "M"

"1000000000" "Yes" "F"

"1000000000" "Yes" "F"

"1000000000" "Yes" "F"

"1000000000" "Yes" "F"

"1000000000" "Yes" "F"

"1000000000" "Yes" "F"

"1000000000" "Yes" "F"

"1000000000" "Yes" "F"

"1000000000" "Yes" "F"

"1000000000" "Yes" "M"

"1000000000" "Yes" "M"

"1000000000" "Yes" "M"

"1000000000" "Yes" "M"

"1000000000" "Yes" "M"

"1000000000" "Yes" "F"

"1000000000" "Yes" "M"

"1000000000" "Yes" "M"

"1000000000" "Yes" "M"

"1000000000" "Yes" "M"

"1000000000" "Yes" "M"

"1000000000" "Yes" "M"

"1000000000" "Yes" "M"

"1000000000" "Yes" "M"

"1000000000" "Yes" "M"

"1000000000" "Yes" "M"

"1000000000" "Yes" "M"

"1000000000" "Yes" "M"

"1000000000" "Yes" "M"

"1000000000" "Yes" "M"

"1000000000" "Yes" "M"

"1000000000" "Yes" "M"

"1000000000" "Yes" "M"

"1000000000" "Yes" "F"

"1000000000" "Yes" "M"

"1000000000" "Yes" "F"

"1000000000" "Yes" "M"

"1000000000" "Yes" "F"

"1000000000" "Yes" "M"

"1000000000" "Yes" "M"

"1000000000" "Yes" "M"

"1000000000" "Yes" "M"

"1000000000" "Yes" "M"

"1000000000" "Yes" "M"

"1000000000" "Yes" "M"

"1000000000" "Yes" "M"

"1000000000" "Yes" "M"

"1000000000" "Yes" "M"

"1000000000" "Yes" "M"

"1000000000" "Yes" "M"

"1000000000" "Yes" "M"

"1000000000" "Yes" "M"

"1000000000" "Yes" "M"

"1000000000" "Yes" "M"

"1000000000" "Yes" "M"

"1000000000" "Yes" "M"

"1000000000" "Yes" "M"

"1000000000" "Yes" "M"

"1000000000" "Yes" "M"

"1000000000" "Yes" "M"

"1000000000" "Yes" "F"

"1000000000" "Yes" "F"

"1000000000" "Yes" "M"

"1000000000" "Yes" "M"

"1000000000" "Yes" "M"

"1000000000" "Yes" "M"

"1000000000" "Yes" "M"

"1000000000" "Yes" "F"

"1000000000" "Yes" "M"

"1000000000" "Yes" "M"

"1000000000" "Yes" "M"

"1000000000" "Yes" "M"

"1000000000" "Yes" "M"

"1010000000" "Yes" "F"

"1000000000" "Yes" "M"

"1000000000" "Yes" "M"

"1000000000" "Yes" "M"

"1000000000" "Yes" "M"

"1000000000" "Yes" "M"

"1000000000" "Yes" "M"

"1000000000" "Yes" "M"

"1000000000" "Yes" "M"

"1000000000" "Yes" "M"

"1000000000" "Yes" "M"

"1000000000" "Yes" "M"

"1000000000" "Yes" "M"

"1000000000" "Yes" "F"

"1000000000" "Yes" "M"

"1000000000" "Yes" "M"

"1000000000" "Yes" "M"

"1000000000" "Yes" "M"

"1000000000" "Yes" "M"

"1000000000" "Yes" "M"

"1000100000" "Yes" "F"

"1000000000" "Yes" "M"

"1100000000" "Yes" "M"

"1000000000" "Yes" "M"

"1000000000" "Yes" "M"

"1000000000" "Yes" "M"

"1000000000" "Yes" "M"

"1001000000" "Yes" "M"

"1000000000" "Yes" "M"

"1000000000" "Yes" "M"

"1000000000" "Yes" "F"

"1000000000" "Yes" "M"

"1000000000" "Yes" "M"

"1000000000" "Yes" "M"

"1000000000" "Yes" "M"

"1000000000" "Yes" "M"

"1000000000" "Yes" "M"

"1000000000" "Yes" "M"

"1000000000" "Yes" "M"

"1000000000" "Yes" "M"

"1000000000" "Yes" "M"

"1000000000" "Yes" "F"

"1000000000" "Yes" "M"

"1000000000" "Yes" "M"

"1000000000" "Yes" "M"

"1000000000" "Yes" "M"

"1000000000" "Yes" "M"

"1000000000" "Yes" "M"

"1000000000" "Yes" "M"

"1000000000" "Yes" "M"

"1000000000" "Yes" "M"

"1000000000" "Yes" "M"

"1000000000" "Yes" "M"

"1100000000" "Yes" "M"

"1000000000" "Yes" "M"

"1000000000" "Yes" "M"

"1000000000" "Yes" "F"

"1100000000" "Yes" "M"

"1000000000" "Yes" "M"

"1000000000" "Yes" "M"

"1000000000" "Yes" "M"

"1000000000" "Yes" "M"

"1000000000" "Yes" "M"

"1010000000" "Yes" "M"

"1000000000" "Yes" "F"

"1010000000" "Yes" "M"

"1000000000" "Yes" "M"

"1000000000" "Yes" "M"

"1000000000" "Yes" "M"

"1000000000" "Yes" "M"

"1000000000" "Yes" "M"

"1000000000" "Yes" "M"

"1000000000" "Yes" "M"

"1000000000" "Yes" "M"

"1000000000" "Yes" "F"

"1000000000" "Yes" "F"

"1000000000" "Yes" "M"

"1000000000" "Yes" "M"

"1000000000" "Yes" "M"

"1000000000" "Yes" "F"

"1000000000" "Yes" "F"

"1000000000" "Yes" "F"

"1000000000" "Yes" "F"

"1000000000" "Yes" "M"

"1000000000" "Yes" "F"

"1000000000" "Yes" "M"

"1010000000" "Yes" "F"

"1000000000" "Yes" "M"

"1000000000" "Yes" "M"

"1000000000" "Yes" "M"

"1100000000" "Yes" "F"

"1000000000" "Yes" "F"

"1000000000" "Yes" "M"

"1010000000" "Yes" "F"

"1100000000" "Yes" "F"

"1100000000" "Yes" "M"

"1010000000" "Yes" "F"

"1000000000" "Yes" "F"

"1000000000" "Yes" "M"

"1000000000" "Yes" "M"

"1000000000" "Yes" "F"

"1000000000" "Yes" "M"

"1000000000" "Yes" "M"

"1000000000" "Yes" "F"

"1000000000" "Yes" "M"

"1000000000" "Yes" "M"

"1000000000" "Yes" "F"

"1000000000" "Yes" "F"

"1000000000" "Yes" "M"

"1000000000" "Yes" "M"

"1010000000" "Yes" "F"

"1000000000" "Yes" "F"

"1100000000" "Yes" "M"

"1000000000" "Yes" "M"

"1000000000" "Yes" "M"

"1000000000" "Yes" "M"

"1000000000" "Yes" "M"

"1000000000" "Yes" "M"

"1000000000" "Yes" "F"

"1000000000" "Yes" "M"

"1000000000" "Yes" "M"

"1000000000" "Yes" "M"

"1000000000" "Yes" "F"

"1000000000" "Yes" "F"

"1000000000" "Yes" "M"

"1000000000" "Yes" "M"

"1000000000" "Yes" "M"

"1000000000" "Yes" "M"

"1100000000" "Yes" "M"

"1000000000" "Yes" "M"

"1000000000" "Yes" "M"

"1000000000" "Yes" "M"

"1000000000" "Yes" "M"

"1000000000" "Yes" "M"

"1000000000" "Yes" "F"

"1000000000" "Yes" "M"

"1000000000" "Yes" "M"

"1000000000" "Yes" "F"

"1000000000" "Yes" "M"

"1000000000" "Yes" "F"

"1000000000" "Yes" "M"

"1000000000" "Yes" "M"

"1000000000" "Yes" "M"

"1000000000" "Yes" "M"

"1001000000" "Yes" "M"

"1000000000" "Yes" "F"

"1000000000" "Yes" "M"

"1000000000" "Yes" "F"

"1000000000" "Yes" "F"

"1000000000" "Yes" "M"

"1000000000" "Yes" "M"

"1000000000" "Yes" "F"

"1000000000" "Yes" "F"

"1001000000" "Yes" "M"

"1000000000" "Yes" "F"

"1000000000" "Yes" "M"

"1000000000" "Yes" "M"

"1000000000" "Yes" "M"

"1000000000" "Yes" "M"

"1000000000" "Yes" "M"

"1000000000" "Yes" "F"

"1000000000" "Yes" "M"

"1000000000" "Yes" "F"

"1000000000" "Yes" "M"

"1010000000" "Yes" "M"

"1000000000" "Yes" "M"

"1000000000" "Yes" "F"

"1000000000" "Yes" "F"

"1000000000" "Yes" "F"

"1000000000" "Yes" "F"

"1000000000" "Yes" "M"

"1000000000" "Yes" "F"

"1000000000" "Yes" "M"

"1000000000" "Yes" "M"

"1100000000" "Yes" "M"

"1000000000" "Yes" "F"

"1000000000" "Yes" "M"

"1000000000" "Yes" "F"

"1000000000" "Yes" "F"

"1000000000" "Yes" "M"

"1000000000" "Yes" "F"

"1000000000" "Yes" "M"

"1000000000" "Yes" "F"

"1000000000" "Yes" "M"

"1000000000" "Yes" "M"

"1000000000" "Yes" "F"

"1000000000" "Yes" "F"

"1000000000" "Yes" "M"

"1000000000" "Yes" "M"

"1000000000" "Yes" "M"

"1000000000" "Yes" "F"

"1000000000" "Yes" "M"

"1000000000" "Yes" "M"

"1000000000" "Yes" "F"

"1000000000" "Yes" "M"

"1000000000" "Yes" "M"

"1000000000" "Yes" "F"

"1000000000" "Yes" "M"

"1000000000" "Yes" "M"

"1000000000" "Yes" "M"

"1001000000" "Yes" "F"

"1000000000" "Yes" "F"

"1000000000" "Yes" "M"

"1000000000" "Yes" "M"

"1000000000" "Yes" "M"

"1000000000" "Yes" "M"

"1000000000" "Yes" "M"

"1000000000" "Yes" "F"

"1000000000" "Yes" "F"

"1000000000" "Yes" "M"

"1000000000" "Yes" "F"

"1000000000" "Yes" "M"

"1000000000" "Yes" "M"

"1000000000" "Yes" "M"

"1000000000" "Yes" "M"

"1000000000" "Yes" "F"

"1000000000" "Yes" "F"

"1000000000" "Yes" "M"

"1000000000" "Yes" "M"

"1000000000" "Yes" "M"

"1000000000" "Yes" "F"

"1000000000" "Yes" "F"

"1000000000" "Yes" "M"

"1000000000" "Yes" "F"

"1000000000" "Yes" "M"

"1000000000" "Yes" "M"

"1000000000" "Yes" "F"

"1000000000" "Yes" "M"

"1000000000" "Yes" "M"

"1000000000" "Yes" "F"

"1000000000" "Yes" "M"

"1000000000" "Yes" "M"

"1000000000" "Yes" "F"

"1000000000" "Yes" "M"

"1000000000" "Yes" "F"

"1000000000" "Yes" "M"

"1000000000" "Yes" "M"

"1000000000" "Yes" "M"

"1000000000" "Yes" "M"

"1000000000" "Yes" "M"

"1000000000" "Yes" "M"

"1000000000" "Yes" "M"

"1000000000" "Yes" "F"

"1000000000" "Yes" "M"

"1000000000" "Yes" "M"

"1000000000" "Yes" "M"

"1000000000" "Yes" "M"

"1000000000" "Yes" "F"

"1000000000" "Yes" "M"

"1000000000" "Yes" "M"

"1000000000" "Yes" "F"

"1000000000" "Yes" "M"

"1000000000" "Yes" "F"

"1000000000" "Yes" "M"

"1000000000" "Yes" "M"

"1000000000" "Yes" "F"

"1000000000" "Yes" "M"

"1000000000" "Yes" "M"

"1000000000" "Yes" "F"

"1000000000" "Yes" "M"

"1000000000" "Yes" "F"

"1000000000" "Yes" "M"

"1000000000" "Yes" "M"

"1000000000" "Yes" "M"

"1000000000" "Yes" "M"

"1000000000" "Yes" "M"

"1000000000" "Yes" "M"

"1000000000" "Yes" "F"

"1000000000" "Yes" "F"

"1000000000" "Yes" "M"

"1100000000" "Yes" "F"

"1000000000" "Yes" "M"

"1000000000" "Yes" "M"

"1000000000" "Yes" "M"

"1000000000" "Yes" "M"

"1000001000" "Yes" "M"

"1000000000" "Yes" "M"

"1000000000" "Yes" "M"

"1000000000" "Yes" "M"

"1000000000" "Yes" "F"

"1000000000" "Yes" "M"

"1000000000" "Yes" "F"

"1100000000" "Yes" "M"

"1000000000" "Yes" "M"

"1000000000" "Yes" "M"

"1000000000" "Yes" "M"

"1000000000" "Yes" "M"

"1000000000" "Yes" "M"

"1000000000" "Yes" "M"

"1000000000" "Yes" "M"

"1000000000" "Yes" "M"

"1000000000" "Yes" "M"

"1000000000" "Yes" "M"

"1000000000" "Yes" "M"

"1000000000" "Yes" "M"

"1000000000" "Yes" "M"

"1000000000" "Yes" "F"

"1000000000" "Yes" "M"

"1000000000" "Yes" "M"

"1000000000" "Yes" "M"

"1000000000" "Yes" "M"

"1000000000" "Yes" "M"

"1000000000" "Yes" "M"

"1000000000" "Yes" "M"

"1000000000" "Yes" "M"

"1000000000" "Yes" "M"

"1000000000" "Yes" "M"

"1000000000" "Yes" "M"

"1000000000" "Yes" "M"

"1000000000" "Yes" "M"

"1000000000" "Yes" "F"

"1000000000" "Yes" "M"

"1000000000" "Yes" "M"

"1000000000" "Yes" "M"

"1000000000" "Yes" "F"

"1000000000" "Yes" "F"

"1000000000" "Yes" "F"

"1000000000" "Yes" "F"

"1000000000" "Yes" "F"

"1000000000" "Yes" "M"

"1001000000" "Yes" "M"

"1000000000" "Yes" "M"

"1000000000" "Yes" "F"

"1000000000" "Yes" "M"

"1000000000" "Yes" "M"

"1000000000" "Yes" "M"

"1000000000" "Yes" "M"

"1000000000" "Yes" "M"

"1000000000" "Yes" "M"

"1000000000" "Yes" "M"

"1000000000" "Yes" "F"

"1000000000" "Yes" "M"

"1000000000" "Yes" "M"

"1000000000" "Yes" "F"

"1000000000" "Yes" "F"

"1000000000" "Yes" "M"

"1000000000" "Yes" "M"

"1001000000" "Yes" "M"

"1000000000" "Yes" "M"

"1000000000" "Yes" "M"

"1000000000" "Yes" "F"

"1000000000" "Yes" "M"

"1000000000" "Yes" "M"

"1000000000" "Yes" "M"

"1000000000" "Yes" "M"

"1000000000" "Yes" "M"

"1000000000" "Yes" "M"

"1000000000" "Yes" "M"

"1000000000" "Yes" "F"

"1000000000" "Yes" "M"

"1000000000" "Yes" "M"

"1000000000" "Yes" "M"

"1000000000" "Yes" "M"

"1100000000" "Yes" "M"

"1000000000" "Yes" "M"

"1000000000" "Yes" "M"

"1000000000" "Yes" "F"

"1000000000" "Yes" "M"

"1000000000" "Yes" "F"

"1000000000" "Yes" "M"

"1000000000" "Yes" "M"

"1000000000" "Yes" "M"

"1000000000" "Yes" "M"

"1000000000" "Yes" "M"

"1000000000" "Yes" "M"

"1000000000" "Yes" "M"

"1000000000" "Yes" "M"

"1000000000" "Yes" "F"

"1000000000" "Yes" "M"

"1000000000" "Yes" "M"

"1000000000" "Yes" "M"

"1000000000" "Yes" "M"

"1000000000" "Yes" "M"

"1000000000" "Yes" "F"

"1000000000" "Yes" "F"

"1000000000" "Yes" "M"

"1000000000" "Yes" "F"

"1000000000" "Yes" "M"

"1000000000" "Yes" "M"

"1010000000" "Yes" "F"

"1000000000" "Yes" "F"

"1000000000" "Yes" "F"

"1000000000" "Yes" "M"

"1000000000" "Yes" "M"

"1000000000" "Yes" "M"

"1000000000" "Yes" "M"

"1000000000" "Yes" "M"

"1000000000" "Yes" "M"

"1000000000" "Yes" "M"

"1000000000" "Yes" "M"

"1000000001" "Yes" "M"

"1000000000" "Yes" "M"

"1000000000" "Yes" "M"

"1000000000" "Yes" "F"

"1000000000" "Yes" "F"

"1000000000" "Yes" "M"

"1000000000" "Yes" "F"

"1000000000" "Yes" "M"

"1000000000" "Yes" "M"

"1000000000" "Yes" "M"

"1000000000" "Yes" "M"

"1000000000" "Yes" "M"

"1000000000" "Yes" "M"

"1000000000" "Yes" "M"

"1000000000" "Yes" "F"

"1000000000" "Yes" "F"

"1000000000" "Yes" "F"

"1000000000" "Yes" "M"

"1000000000" "Yes" "M"

"1000000000" "Yes" "F"

"1000100000" "Yes" "M"

"1000000000" "Yes" "M"

"1000000000" "Yes" "M"

"1000000100" "Yes" "F"

"1000000000" "Yes" "M"

"1000000000" "Yes" "M"

"1000000000" "Yes" "M"

"1000000000" "Yes" "M"

"1000000000" "Yes" "F"

"1000000000" "Yes" "M"

"1000000000" "Yes" "M"

"1000000000" "Yes" "F"

"1000000000" "Yes" "M"

"1000000000" "Yes" "M"

"1000000000" "Yes" "M"

"1000000000" "Yes" "M"

"1000000000" "Yes" "M"

"1000000000" "Yes" "M"

"1000000000" "Yes" "M"

"1000000000" "Yes" "M"

"1000000000" "Yes" "F"

"1000000000" "Yes" "F"

"1000000000" "Yes" "M"

"1000000000" "Yes" "M"

"1000000000" "Yes" "F"

"1000000000" "Yes" "M"

"1000000000" "Yes" "M"

"1000000000" "Yes" "M"

"1000000000" "Yes" "M"

"1000000000" "Yes" "F"

"1000000000" "Yes" "M"

"1000000000" "Yes" "M"

"1000000000" "Yes" "F"

"1010000000" "Yes" "M"

"1000000000" "Yes" "F"

"1000000000" "Yes" "F"

"1000000000" "Yes" "F"

"1000000000" "Yes" "F"

"1000000000" "Yes" "F"

"1000000000" "Yes" "M"

"1000000000" "Yes" "F"

"1000000000" "Yes" "M"

"1000000000" "Yes" "M"

"1000000000" "Yes" "M"

"1000000000" "Yes" "M"

"1000000000" "Yes" "M"

"1000000000" "Yes" "M"

"1000000000" "Yes" "M"

"1000000000" "Yes" "M"

"1000000000" "Yes" "F"

"1000000000" "Yes" "M"

"1000000000" "Yes" "M"

"1000000000" "Yes" "M"

"1000000000" "Yes" "M"

"1000000000" "Yes" "M"

"1000000000" "Yes" "M"

"1000000000" "Yes" "M"

"1000000000" "Yes" "M"

"1000000000" "Yes" "M"

"1000000000" "Yes" "M"

"1000000000" "Yes" "M"

"1000000000" "Yes" "M"

"1000000000" "Yes" "M"

"1000000000" "Yes" "M"

"1000000000" "Yes" "F"

"1000000000" "Yes" "M"

"1000000000" "Yes" "M"

"1000000000" "Yes" "M"

"1100000000" "Yes" "M"

"1000000000" "Yes" "F"

"1000000000" "Yes" "F"

"1000000000" "Yes" "M"

"1000000000" "Yes" "M"

"1000000000" "Yes" "M"

"1100000000" "Yes" "M"

"1000000000" "Yes" "M"

"1000000000" "Yes" "M"

"1100000000" "Yes" "M"

"1000000000" "Yes" "M"

"1000000000" "Yes" "M"

"1000000000" "Yes" "M"

"1000000000" "Yes" "M"

"1000000000" "Yes" "F"

"1000000000" "Yes" "M"

"1000000000" "Yes" "M"

"1000000000" "Yes" "F"

"1000000000" "Yes" "M"

"1000000000" "Yes" "F"

"1000000000" "Yes" "M"

"1000010000" "Yes" "M"

"1000000000" "Yes" "M"

"1000000000" "Yes" "M"

"1000000000" "Yes" "M"

"1000000000" "Yes" "F"

"1000000000" "Yes" "M"

"1000000000" "Yes" "M"

"1000000000" "Yes" "M"

"1000000000" "Yes" "F"

"1000000000" "Yes" "M"

"1000000000" "Yes" "M"

"1000000000" "Yes" "F"

"1000000000" "Yes" "M"

"1000000000" "Yes" "M"

"1000000000" "Yes" "M"

"1000000000" "Yes" "M"

"1010000000" "Yes" "M"

"1000000000" "Yes" "F"

"1000000000" "Yes" "F"

"1000000000" "Yes" "M"

"1000000000" "Yes" "M"

"1000000000" "Yes" "F"

"1000000000" "Yes" "M"

"1000000000" "Yes" "F"

"1000000000" "Yes" "M"

"1000000000" "Yes" "M"

"1000000000" "Yes" "F"

"1000000000" "Yes" "F"

"1000000000" "Yes" "M"

"1000000000" "Yes" "M"

"1000000000" "Yes" "F"

"1000000000" "Yes" "F"

"1000000000" "Yes" "M"

"1000000000" "Yes" "F"

"1000000000" "Yes" "F"

"1000000000" "Yes" "M"

"1000000000" "Yes" "M"

"1000000000" "Yes" "M"

"1000000000" "Yes" "M"

"1000000000" "Yes" "M"

"1000000000" "Yes" "M"

"1000000000" "Yes" "F"

"1000000000" "Yes" "F"

"1000000000" "Yes" "M"

"1000000000" "Yes" "M"

"1000000000" "Yes" "M"

"1000000000" "Yes" "M"

"1000000000" "Yes" "F"

"1000000000" "Yes" "M"

"1000000000" "Yes" "M"

"1000000000" "Yes" "F"

"1000000000" "Yes" "M"

"1000000000" "Yes" "F"

"1000000000" "Yes" "M"

"1000000000" "Yes" "F"

"1000000000" "Yes" "M"

"1000000000" "Yes" "F"

"1000000000" "Yes" "M"

"1000000000" "Yes" "M"

"1000000000" "Yes" "M"

"1000000000" "Yes" "M"

"1000000000" "Yes" "M"

"1000000000" "Yes" "F"

"1000000000" "Yes" "F"

"1000000000" "Yes" "M"

"1000000000" "Yes" "M"

"1000000000" "Yes" "M"

"1000000000" "Yes" "M"

"1000000000" "Yes" "M"

"1000000000" "Yes" "M"

"1000000000" "Yes" "M"

"1000000000" "Yes" "M"

"1000000000" "Yes" "M"

"1000000000" "Yes" "F"

"1000000000" "Yes" "M"

"1000000000" "Yes" "M"

"1000000000" "Yes" "M"

"1000000000" "Yes" "F"

"1000000000" "Yes" "M"

"1000000000" "Yes" "M"

"1000000000" "Yes" "M"

"1000000000" "Yes" "M"

"1000000000" "Yes" "M"

"1000000000" "Yes" "F"

"1000000000" "Yes" "M"

"1000000000" "Yes" "M"

"1000000000" "Yes" "F"

"1000000000" "Yes" "M"

"1000000000" "Yes" "M"

"1000000000" "Yes" "M"

"1000000000" "Yes" "F"

"1000000000" "Yes" "F"

"1000000000" "Yes" "M"

"1000000000" "Yes" "M"

"1000000000" "Yes" "M"

"1000000000" "Yes" "F"

"1000000000" "Yes" "M"

"1000000000" "Yes" "M"

"1000000000" "Yes" "M"

"1000000000" "Yes" "M"

"1000000000" "Yes" "M"

"1000000000" "Yes" "M"

"1000000000" "Yes" "M"

"1000000000" "Yes" "M"

"1000000000" "Yes" "M"

"1000000000" "Yes" "F"

"1000000000" "Yes" "M"

"1000000000" "Yes" "M"

"1000000000" "Yes" "F"

"1000000000" "Yes" "M"

"1000000000" "Yes" "F"

"1000000000" "Yes" "F"

"1000000000" "Yes" "F"

"1100000000" "Yes" "M"

"1000000000" "Yes" "F"

"1000000000" "Yes" "M"

"1000000000" "Yes" "M"

"1000000000" "Yes" "F"

"1000000000" "Yes" "F"

"1000000000" "Yes" "F"

"1000000000" "Yes" "M"

"1000000000" "Yes" "F"

"1000000000" "Yes" "M"

"1000000000" "Yes" "M"

"1000000000" "Yes" "M"

"1000000000" "Yes" "M"

"1000000000" "Yes" "M"

"1000000000" "Yes" "M"

"1000000000" "Yes" "M"

"1000000000" "Yes" "F"

"1000000000" "Yes" "M"

"1001000000" "Yes" "M"

"1000000000" "Yes" "M"

"1000000000" "Yes" "F"

"1000000000" "Yes" "M"

"1000000000" "Yes" "M"

"1000000000" "Yes" "F"

"1000000000" "Yes" "M"

"1000000000" "Yes" "M"

"1000000000" "Yes" "M"

"1000000000" "Yes" "M"

"1000000000" "Yes" "M"

"1000000000" "Yes" "F"

"1000000000" "Yes" "M"

"1000000000" "Yes" "M"

"1000000000" "Yes" "M"

"1000000000" "Yes" "M"

"1000000000" "Yes" "M"

"1000000000" "Yes" "M"

"1000000000" "Yes" "M"

"1010000000" "Yes" "F"

"1000000000" "Yes" "F"

"1000000000" "Yes" "M"

"1000000000" "Yes" "F"

"1000000000" "Yes" "F"

"1000000000" "Yes" "F"

"1000000000" "Yes" "M"

"1000000000" "Yes" "F"

"1000000000" "Yes" "M"

"1000000000" "Yes" "M"

"1000000000" "Yes" "F"

"1000000000" "Yes" "M"

"1000000000" "Yes" "M"

"1101000000" "Yes" "M"

"1000000000" "Yes" "F"

"1000000000" "Yes" "M"

"1000000000" "Yes" "F"

"1000000000" "Yes" "F"

"1000000000" "Yes" "F"

"1000000000" "Yes" "M"

"1000000000" "Yes" "M"

"1000000000" "Yes" "M"

"1000000000" "Yes" "F"

"1000000000" "Yes" "M"

"1000000000" "Yes" "F"

"1000000000" "Yes" "M"

"1000000000" "Yes" "F"

"1000000000" "Yes" "F"

"1000000000" "Yes" "M"

"1000000000" "Yes" "M"

"1000000000" "Yes" "M"

"1000000000" "Yes" "M"

"1100000000" "Yes" "F"

"1000000000" "Yes" "F"

"1000000000" "Yes" "F"

"1000000000" "Yes" "M"

"1000000000" "Yes" "F"

"1000000000" "Yes" "M"

"1000000000" "Yes" "M"

"1000000000" "Yes" "F"

"1000000000" "Yes" "M"

"1000000000" "Yes" "M"

"1000000000" "Yes" "F"

"1100000000" "Yes" "M"

"1000000000" "Yes" "M"

"1000000000" "Yes" "F"

"1000000000" "Yes" "F"

"1000000000" "Yes" "M"

"1000000000" "Yes" "M"

"1000000000" "Yes" "F"

"1000000000" "Yes" "F"

"1000000000" "Yes" "M"

"1000000000" "Yes" "M"

"1000000000" "Yes" "M"

"1000000000" "Yes" "M"

"1001000000" "Yes" "M"

"1000000000" "Yes" "F"

"1000000000" "Yes" "M"

"1000000000" "Yes" "M"

"1000000000" "Yes" "M"

"1000000000" "Yes" "M"

"1000000000" "Yes" "M"

"1000000000" "Yes" "F"

"1000000000" "Yes" "M"

"1000000000" "Yes" "F"

"1000000000" "Yes" "M"

"1000000000" "Yes" "M"

"1000000000" "Yes" "M"

"1000000000" "Yes" "M"

"1000000000" "Yes" "M"

"1000000000" "Yes" "M"

"1000000000" "Yes" "M"

"1000000000" "Yes" "F"

"1000000000" "Yes" "F"

"1000000000" "Yes" "M"

"1000000000" "Yes" "M"

"1000000000" "Yes" "M"

"1000000000" "Yes" "M"

"1000000000" "Yes" "F"

"1000000000" "Yes" "F"

"1010000000" "Yes" "F"

"1000000000" "Yes" "M"

"1000100000" "Yes" "M"

"1000000000" "Yes" "F"

"1000000000" "Yes" "M"

"1000000000" "Yes" "F"

"1000000000" "Yes" "M"

"1000000000" "Yes" "M"

"1000000000" "Yes" "M"

"1000000000" "Yes" "M"

"1000000000" "Yes" "F"

"1000000000" "Yes" "M"

"1000000000" "Yes" "F"

"1000000000" "Yes" "M"

"1000000000" "Yes" "M"

"1000000000" "Yes" "M"

"1000000000" "Yes" "M"

"1000000000" "Yes" "M"

"1000000000" "Yes" "M"

"1000000000" "Yes" "M"

"1000000000" "Yes" "M"

"1000000000" "Yes" "F"

"1000000000" "Yes" "F"

"1000000000" "Yes" "F"

"1000000000" "Yes" "F"

"1000000000" "Yes" "F"

"1000000000" "Yes" "F"

"1000000000" "Yes" "F"

"1000000000" "Yes" "F"

"1000000000" "Yes" "M"

"1000000000" "Yes" "F"

"1000010000" "Yes" "M"

"1000000000" "Yes" "M"

"1000000000" "Yes" "F"

"1000000000" "Yes" "M"

"1000000000" "Yes" "M"

"1000000000" "Yes" "M"

"1101000000" "Yes" "M"

"1000000000" "Yes" "F"

"1000000000" "Yes" "F"

"1000000000" "Yes" "M"

"1000000000" "Yes" "F"

"1000000000" "Yes" "M"

"1000000000" "Yes" "F"

"1000000000" "Yes" "M"

"1000000000" "Yes" "M"

"1000000000" "Yes" "F"

"1000000000" "Yes" "M"

"1000000000" "Yes" "M"

"1000000000" "Yes" "F"

"1000000000" "Yes" "M"

"1000000000" "Yes" "M"

"1010000000" "Yes" "M"

"1000000000" "Yes" "M"

"1000000000" "Yes" "M"

"1000000000" "Yes" "M"

"1000000000" "Yes" "M"

"1000000000" "Yes" "M"

"1000000000" "Yes" "M"

"1000000000" "Yes" "M"

"1000000000" "Yes" "F"

"1000000000" "Yes" "M"

"1000000000" "Yes" "M"

"1000000000" "Yes" "F"

"1000000000" "Yes" "F"

"1000000000" "Yes" "M"

"1000000000" "Yes" "M"

"1000000000" "Yes" "M"

"1000000000" "Yes" "F"

"1010000000" "Yes" "F"

"1000000000" "Yes" "M"

"1000000000" "Yes" "M"

"1000000000" "Yes" "F"

"1000000000" "Yes" "M"

"1000000000" "Yes" "M"

"1000000000" "Yes" "M"

"1000000000" "Yes" "M"

"1000000000" "Yes" "M"

"1000000000" "Yes" "F"

"1000000000" "Yes" "M"

"1000000000" "Yes" "M"

"1000000000" "Yes" "M"

"1000000000" "Yes" "M"

"1000000000" "Yes" "M"

"1000000000" "Yes" "M"

"1000000000" "Yes" "F"

"1000000000" "Yes" "M"

"1000000000" "Yes" "M"

"1000000000" "Yes" "M"

"1000000000" "Yes" "M"

"1000000000" "Yes" "M"

"1000000000" "Yes" "F"

"1000000000" "Yes" "F"

"1000000000" "Yes" "M"

"1000000000" "Yes" "M"

"1000000000" "Yes" "M"

"1000000000" "Yes" "M"

"1000000000" "Yes" "F"

"1000000000" "Yes" "M"

"1001000000" "Yes" "M"

"1000000000" "Yes" "F"

"1000000000" "Yes" "M"

"1000000000" "Yes" "F"

"1000000000" "Yes" "M"

"1000000000" "Yes" "M"

"1000000000" "Yes" "M"

"1000000000" "Yes" "M"

"1000000000" "Yes" "M"

"1000000000" "Yes" "M"

"1000000000" "Yes" "M"

"1000000000" "Yes" "M"

"1000000000" "Yes" "M"

"1000000000" "Yes" "M"

"1000000000" "Yes" "M"

"1000000000" "Yes" "M"

"1100000000" "Yes" "M"

"1000000000" "Yes" "F"

"1000000000" "Yes" "M"

"1000000000" "Yes" "F"

"1000000000" "Yes" "M"

"1000000000" "Yes" "M"

"1000000000" "Yes" "M"

"1000000000" "Yes" "M"

"1000000000" "Yes" "M"

"1000000000" "Yes" "F"

"1000000000" "Yes" "M"

"1000000000" "Yes" "M"

"1000000000" "Yes" "F"

"1100000000" "Yes" "M"

"1000000000" "Yes" "M"

"1000000000" "Yes" "M"

"1000000000" "Yes" "M"

"1000000000" "Yes" "M"

"1000000000" "Yes" "F"

"1100000000" "Yes" "F"

"1000000000" "Yes" "M"

"1000000000" "Yes" "M"

"1000000000" "Yes" "F"

"1000000000" "Yes" "M"

"1000000000" "Yes" "F"

"1000000000" "Yes" "F"

"1010000000" "Yes" "M"

"1000000000" "Yes" "M"

"1000000000" "Yes" "F"

"1000000000" "Yes" "M"

"1000000000" "Yes" "F"

"1100000000" "Yes" "M"

"1000000000" "Yes" "F"

"1000000000" "Yes" "M"

"1000000000" "Yes" "F"

"1000000000" "Yes" "M"

"1000000000" "Yes" "F"

"1010000000" "Yes" "F"

"1000000000" "Yes" "F"

"1010000000" "Yes" "F"

"1000000000" "Yes" "M"

"1000000000" "Yes" "F"

"1000000000" "Yes" "M"

"1100000000" "Yes" "M"

"1100000000" "Yes" "M"

"1000000000" "Yes" "F"

"1100000000" "Yes" "M"

"1000000000" "Yes" "F"

"1000000000" "Yes" "M"

"1100000000" "Yes" "M"

"1000000000" "Yes" "M"

"1010000000" "Yes" "M"

"1000000000" "Yes" "M"

"1100000000" "Yes" "M"

"1000000000" "Yes" "F"

"1100000000" "Yes" "F"

"1010000000" "Yes" "F"

"1000000000" "Yes" "M"

"1010000000" "Yes" "F"

"1010000000" "Yes" "F"

"1000000000" "Yes" "F"

"1000000000" "Yes" "M"

"1100000000" "Yes" "F"

"1100000000" "Yes" "F"

"1010000000" "Yes" "F"

"1000000000" "Yes" "M"

"1000000000" "Yes" "F"

"1000000000" "Yes" "F"

"1000000000" "Yes" "M"

"1000100000" "Yes" "F"

"1000000000" "Yes" "M"

"1000000000" "Yes" "F"

"1000000000" "Yes" "F"

"1001000000" "Yes" "M"

"1000000000" "Yes" "M"

"1000000000" "Yes" "F"

"1000000000" "Yes" "M"

"1000000000" "Yes" "M"

"1000000000" "Yes" "M"

"1000000000" "Yes" "F"

"1000000000" "Yes" "M"

"1000000000" "Yes" "F"

"1000000000" "Yes" "M"

"1000000000" "Yes" "M"

"1000000000" "Yes" "F"

"1000000000" "Yes" "M"

"1000000000" "Yes" "M"

"1000000000" "Yes" "M"

"1000000000" "Yes" "M"

"1000000000" "Yes" "M"

"1000000000" "Yes" "M"

"1000000000" "Yes" "M"

"1000000000" "Yes" "M"

"1000000000" "Yes" "F"

"1000000000" "Yes" "M"

"1000000000" "Yes" "M"

"1000000000" "Yes" "F"

"1000000000" "Yes" "F"

"1000000000" "Yes" "F"

"1000000000" "Yes" "F"

"1000000000" "Yes" "F"

"1000000000" "Yes" "F"

"1000000000" "Yes" "M"

"1000000000" "Yes" "F"

"1000000000" "Yes" "F"

"1000000000" "Yes" "F"

"1000000000" "Yes" "F"

"1000000000" "Yes" "M"

"1000000000" "Yes" "M"

"1000000000" "Yes" "M"

"1000000000" "Yes" "F"

"1000000000" "Yes" "M"

"1000000000" "Yes" "M"

"1000000000" "Yes" "F"

"1000000000" "Yes" "M"

"1000000000" "Yes" "M"

"1000000000" "Yes" "F"

"1000000000" "Yes" "M"

"1000000000" "Yes" "F"

"1000000000" "Yes" "M"

"1000000000" "Yes" "M"

"1000000000" "Yes" "M"

"1000000000" "Yes" "M"

"1000000000" "Yes" "F"

"1000000000" "Yes" "M"

"1000000000" "Yes" "M"

"1000000000" "Yes" "F"

"1100000000" "Yes" "M"

"1000000000" "Yes" "M"

"1000000000" "Yes" "M"

"1000000000" "Yes" "M"

"1000000000" "Yes" "F"

"1000000000" "Yes" "M"

"1000000000" "Yes" "F"

"1000000000" "Yes" "M"

"1000000000" "Yes" "M"

"1000000000" "Yes" "M"

"1000000000" "Yes" "M"

"1000000000" "Yes" "F"

"1000000000" "Yes" "F"

"1000000000" "Yes" "M"

"1000000000" "Yes" "M"

"1000000000" "Yes" "U"

"1000000000" "Yes" "M"

"1000000000" "Yes" "M"

"1000000000" "Yes" "M"

"1000000000" "Yes" "F"

"1000000000" "Yes" "M"

"1000000000" "Yes" "M"

"1000000000" "Yes" "M"

"1000000000" "Yes" "M"

"1000000000" "Yes" "M"

"1000000000" "Yes" "M"

"1000000000" "Yes" "M"

"1000000000" "Yes" "F"

"1000000000" "Yes" "M"

"1000000000" "Yes" "F"

"1000000000" "Yes" "M"

"1000000000" "Yes" "F"

"1000000000" "Yes" "F"

"1000000000" "Yes" "M"

"1101000000" "Yes" "M"

"1000000000" "Yes" "M"

"1000000000" "Yes" "M"

"1000000000" "Yes" "F"

"1000000000" "Yes" "M"

"1000000000" "Yes" "F"

"1000000000" "Yes" "M"

"1000000000" "Yes" "M"

"1000000000" "Yes" "F"

"1000000000" "Yes" "M"

"1000000000" "Yes" "M"

"1000000000" "Yes" "M"

"1000000000" "Yes" "F"

"1000000000" "Yes" "F"

"1000000000" "Yes" "F"

"1000000000" "Yes" "M"

"1000000000" "Yes" "F"

"1000000000" "Yes" "M"

"1000000000" "Yes" "M"

"1000000000" "Yes" "M"

"1000000000" "Yes" "F"

"1000000000" "Yes" "F"

"1000000000" "Yes" "M"

"1000000000" "Yes" "M"

"1000000000" "Yes" "M"

"1100000000" "Yes" "M"

"1000000000" "Yes" "M"

"1000000000" "Yes" "M"

"1000000000" "Yes" "M"

"1000000000" "Yes" "M"

"1100000000" "Yes" "M"

"1000000000" "Yes" "M"

"1000000000" "Yes" "M"

"1000000000" "Yes" "F"

"1000000000" "Yes" "M"

"1000000000" "Yes" "M"

"1000000000" "Yes" "F"

"1000000000" "Yes" "M"

"1000000000" "Yes" "M"

"1000000000" "Yes" "M"

"1000000000" "Yes" "M"

"1000000000" "Yes" "F"

"1000000000" "Yes" "M"

"1000000000" "Yes" "M"

"1000000000" "Yes" "M"

"1000000000" "Yes" "M"

"1000000000" "Yes" "F"

"1000000000" "Yes" "M"

"1000000000" "Yes" "M"

"1000000000" "Yes" "M"

"1000000000" "Yes" "M"

"1000000000" "Yes" "M"

"1000000000" "Yes" "F"

"1000000000" "Yes" "F"

"1000000000" "Yes" "M"

"1000000000" "Yes" "M"

"1000000000" "Yes" "F"

"1000000000" "Yes" "F"

"1000000000" "Yes" "M"

"1000000000" "Yes" "F"

"1000000000" "Yes" "M"

"1000000000" "Yes" "F"

"1000000000" "Yes" "M"

"1000000000" "Yes" "F"

"1000000000" "Yes" "M"

"1000000000" "Yes" "F"

"1000000000" "Yes" "F"

"1000000000" "Yes" "M"

"1000000000" "Yes" "F"

"1000000000" "Yes" "M"

"1000000000" "Yes" "F"

"1000000000" "Yes" "M"

"1000000000" "Yes" "M"

"1000000000" "Yes" "M"

"1000000000" "Yes" "M"

"1000000000" "Yes" "M"

"1000000000" "Yes" "M"

"1000000000" "Yes" "M"

"1000000000" "Yes" "M"

"1000000000" "Yes" "M"

"1000000000" "Yes" "M"

"1000000000" "No" "M"

"1000000000" "No" "F"

"1000000000" "No" "M"

"1000000000" "No" "M"

"1000000000" "No" "F"

"1000000000" "No" "M"

"1000000000" "No" "F"

"1000000000" "No" "F"

"1000000000" "No" "M"

"1000000000" "No" "M"

"1000000000" "No" "M"

"1000000000" "No" "M"

"1000000000" "No" "M"

"1000000000" "No" "M"

"1100000000" "No" "M"

"1000000000" "No" "M"

"1000000000" "No" "M"

"1000000000" "No" "M"

"1000000000" "No" "F"

"1000000000" "No" "F"

"1000000000" "No" "M"

"1000000000" "No" "M"

"1000000000" "No" "M"

"1000000000" "No" "M"

"1000000000" "No" "M"

"1000000000" "No" "M"

"1000000000" "No" "F"

"1000000000" "No" "F"

"1100000000" "No" "M"

"1000000000" "No" "M"

"1000000000" "No" "M"

"1000000000" "No" "F"

"1000000000" "No" "M"

"1000000000" "No" "M"

"1000000000" "No" "M"

"1000000000" "No" "F"

"1000000000" "No" "M"

"1000000000" "No" "F"

"1000000000" "No" "M"

"1000000000" "No" "M"

"1100000000" "No" "M"

"1000000000" "No" "F"

"1000000000" "No" "M"

"1000000000" "No" "M"

"1000000000" "No" "M"

"1000000000" "No" "M"

"1000000000" "No" "F"

"1000000000" "No" "M"

"1000000000" "No" "F"

"1000000000" "No" "F"

"1000000000" "No" "M"

"1000000000" "No" "M"

"1000000000" "No" "M"

"1000000000" "No" "F"

"1000000000" "No" "M"

"1000000000" "No" "M"

"1000000000" "No" "F"

"1000000000" "No" "F"

"1000000000" "No" "F"

"1000000000" "No" "F"

"1000000000" "No" "F"

"1000000000" "No" "M"

"1000000000" "No" "M"

"1100000000" "No" "M"

"1000000000" "No" "M"

"1000000000" "No" "M"

"1000000000" "No" "M"

"1000000000" "No" "M"

"1000000000" "No" "M"

"1000000000" "No" "M"

"1000000000" "No" "F"

"1000000000" "No" "M"

"1000000000" "No" "M"

"1010000000" "No" "M"

"1000000000" "No" "M"

"1000000000" "No" "F"

"1100000000" "No" "M"

"1000000000" "No" "M"

"1000000000" "No" "M"

"1000000000" "No" "M"

"1000000000" "No" "F"

"1000000000" "No" "M"

"1000000000" "No" "M"

"1000000000" "No" "F"

"1000000000" "No" "F"

"1000000000" "No" "F"

"1100000000" "No" "M"

"1000000000" "No" "M"

"1000000000" "No" "M"

"1000000000" "No" "F"

"1000000000" "No" "M"

"1000000000" "No" "F"

"1000000000" "No" "F"

"1000000000" "No" "M"

"1000000000" "No" "M"

"1000000000" "No" "F"

"1000000000" "No" "F"

"1000000000" "No" "F"

"1000000000" "No" "M"

"1000000000" "No" "M"

"1000000000" "No" "F"

"1000000000" "No" "M"

"1000000000" "No" "F"

"1000000000" "No" "F"

"1000000000" "No" "F"

"1000000000" "No" "M"

"1000001000" "No" "M"

"1000000000" "No" "M"

"1000000000" "No" "F"

"1000000000" "No" "M"

"1000000000" "No" "F"

"1000000000" "No" "M"

"1000000000" "No" "M"

"1000000000" "No" "M"

"1000000000" "No" "M"

"1000000000" "No" "F"

"1000000000" "No" "M"

"1000000000" "No" "M"

"1000000000" "No" "M"

"1000000000" "No" "M"

"1000000000" "No" "M"

"1000000000" "No" "F"

"1000000000" "No" "F"

"1000000000" "No" "M"

"1000000000" "No" "F"

"1000000000" "No" "M"

"1000000000" "No" "M"

"1000000000" "No" "M"

"1000000000" "No" "F"

"1000000000" "No" "F"

"1000000000" "No" "M"

"1000000000" "No" "M"

"1000000000" "No" "M"

"1000000000" "No" "F"

"1000000000" "No" "F"

"1000000000" "No" "M"

"1000000000" "No" "F"

"1000000000" "No" "M"

"1000000000" "No" "M"

"1000000000" "No" "M"

"1000000000" "No" "M"

"1000000000" "No" "M"

"1000000000" "No" "M"

"1000000000" "No" "M"

"1000000000" "No" "F"

"1000000000" "No" "M"

"1000000000" "No" "M"

"1000000000" "No" "F"

"1000000000" "No" "F"

"1000000000" "No" "M"

"1000000000" "No" "F"

"1000000000" "No" "F"

"1000000000" "No" "M"

"1000000000" "No" "M"

"1000000000" "No" "M"

"1000000000" "No" "M"

"1000000000" "No" "M"

"1000000000" "No" "F"

"1000000000" "No" "M"

"1100000000" "No" "M"

"1000000000" "No" "M"

"1000000000" "No" "M"

"1000000000" "No" "F"

"1000000000" "No" "F"

"1000000000" "No" "F"

"1000000000" "No" "M"

"1000000000" "No" "F"

"1000000000" "No" "F"

"1000000000" "No" "M"

"1000000000" "No" "M"

"1000000000" "No" "M"

"1000000000" "No" "F"

"1000000000" "No" "M"

"1000000000" "No" "M"

"1000000000" "No" "F"

"1000000000" "No" "M"

"1000000000" "No" "M"

"1000000000" "No" "M"

"1000000000" "No" "F"

"1000000000" "No" "F"

"1000000000" "No" "M"

"1000000000" "No" "M"

"1000000000" "No" "M"

"1000000000" "No" "F"

"1000000000" "No" "M"

"1000000000" "No" "M"

"1000000000" "No" "M"

"1000000000" "No" "F"

"1000000000" "No" "F"

"1000000000" "No" "M"

"1000000000" "No" "M"

"1000000000" "No" "M"

"1000000000" "No" "F"

"1000000000" "No" "F"

"1000000000" "No" "F"

"1000000000" "No" "F"

"1000000000" "No" "M"

"1000000000" "No" "M"

"1000000000" "No" "M"

"1000000000" "No" "F"

"1000000000" "No" "M"

"1000000000" "No" "F"

"1000000000" "No" "M"

"1000000000" "No" "M"

"1000000000" "No" "F"

"1000000000" "No" "M"

"1001000000" "No" "M"

"1000000000" "No" "M"

"1000000000" "No" "M"

"1100000000" "No" "M"

"1000000000" "No" "M"

"1000000000" "No" "M"

"1000000000" "No" "M"

"1000000000" "No" "M"

"1000000000" "No" "F"

"1100000000" "No" "M"

"1000000000" "No" "F"

"1000000000" "No" "F"

"1000000000" "No" "M"

"1000000000" "No" "F"

"1000000000" "No" "M"

"1100000000" "No" "M"

"1100000000" "No" "M"

"1000000000" "No" "F"

"1000000000" "No" "M"

"1000000000" "No" "M"

"1000000000" "No" "F"

"1000000000" "No" "F"

"1000000000" "No" "F"

"1000000000" "No" "M"

"1100000000" "No" "M"

"1000000000" "No" "F"

"1000000000" "No" "M"

"1000000000" "No" "F"

"1000000000" "No" "F"

"1000000000" "No" "M"

"1000000000" "No" "F"

"1000000000" "No" "F"

"1000000000" "No" "M"

"1000000000" "No" "F"

"1000000000" "No" "M"

"1100000000" "No" "M"

"1000000000" "No" "M"

"1000000000" "No" "M"

"1000000000" "No" "M"

"1000000000" "No" "M"

"1000000000" "No" "M"

"1000000000" "No" "F"

"1000000000" "No" "M"

"1000000000" "No" "F"

"1000000000" "No" "M"

"1000000000" "No" "M"

"1000000000" "No" "M"

"1000000000" "No" "M"

"1000000000" "No" "M"

"1000000000" "No" "F"

"1000000000" "No" "M"

"1000000000" "No" "M"

"1000000000" "No" "M"

"1000000000" "No" "M"

"1000000000" "No" "F"

"1000000000" "No" "F"

"1000000000" "No" "M"

"1000000000" "No" "F"

"1000000000" "No" "M"

"1000000000" "No" "M"

"1000000000" "No" "M"

"1000000000" "No" "M"

"1000000000" "No" "M"

"1000000000" "No" "F"

"1100000000" "No" "M"

"1000000000" "No" "M"

"1000000000" "No" "M"

"1000000000" "No" "M"

"1000000000" "No" "M"

"1000000000" "No" "F"

"1000000000" "No" "M"

"1000000000" "No" "F"

"1000000000" "No" "M"

"1000000000" "No" "M"

"1000000000" "No" "F"

"1000010000" "No" "M"

"1000000000" "No" "M"

"1000000000" "No" "F"

"1000000000" "No" "M"

"1000000000" "No" "F"

"1000000000" "No" "F"

"1000000000" "No" "M"

"1000000000" "No" "M"

"1000000000" "No" "F"

"1000000000" "No" "M"

"1000000000" "No" "M"

"1100000000" "No" "M"

"1000000000" "No" "F"

"1100000000" "No" "M"

"1000000000" "No" "M"

"1000000000" "No" "M"

"1000000000" "No" "F"

"1000000000" "No" "F"

"1000000000" "No" "M"

"1000000000" "No" "F"

"1000000000" "No" "M"

"1000000000" "No" "M"

"1000000000" "No" "F"

"1000000000" "No" "M"

"1000000000" "No" "M"

"1000000000" "No" "F"

"1000000000" "No" "M"

"1000000000" "No" "F"

"1000000000" "No" "M"

"1000000000" "No" "M"

"1100000000" "No" "M"

"1000000000" "No" "F"

"1000000000" "No" "M"

"1100000000" "No" "M"

"1000000000" "No" "M"

"1000000000" "No" "M"

"1000000000" "No" "M"

"1000000000" "No" "M"

"1100000000" "No" "M"

"1000000000" "No" "F"

"1000000000" "No" "M"

"1000000000" "No" "M"

"1100000000" "No" "M"

"1000000000" "No" "F"

"1000000000" "No" "F"

"1100000000" "No" "F"

"1000000000" "No" "M"

"1000000000" "No" "F"

"1000000000" "No" "M"

"1000000000" "No" "M"

"1000000000" "No" "M"

"1000000000" "No" "F"

"1000000000" "No" "M"

"1000000000" "No" "M"

"1000000000" "No" "F"

"1000000000" "No" "M"

"1000000000" "No" "F"

"1000000000" "No" "M"

"1000000000" "No" "M"

"1000000000" "No" "F"

"1000000000" "No" "F"

"1000000000" "No" "M"

"1001000000" "No" "M"

"1000000000" "No" "F"

"1000000000" "No" "F"

"1000000000" "No" "M"

"1000000000" "No" "F"

"1000000000" "No" "F"

"1000000000" "No" "M"

"1000000000" "No" "F"

"1000000000" "No" "M"

"1000000000" "No" "M"

"1100000000" "No" "M"

"1000000000" "No" "F"

"1000000000" "No" "M"

"1000000000" "No" "M"

"1000000000" "No" "M"

"1000000000" "No" "F"

"1000000000" "No" "M"

"1000000000" "No" "F"

"1000000000" "No" "M"

"1000000000" "No" "M"

"1000000000" "No" "M"

"1000000000" "No" "F"

"1000000000" "No" "F"

"1000000000" "No" "F"

"1000000000" "No" "M"

"1000000000" "No" "F"

"1000000000" "No" "F"

"1000000000" "No" "M"

"1000000000" "No" "M"

"1000000000" "No" "M"

"1000000000" "No" "F"

"1000000000" "No" "M"

"1000000000" "No" "M"

"1000000000" "No" "M"

"1000000000" "No" "F"

"1000000000" "No" "M"

"1000000000" "No" "F"

"1000000000" "No" "M"

"1000000000" "No" "F"

"1000000000" "No" "M"

"1000000000" "No" "M"

"1000000000" "No" "F"

"1000000000" "No" "M"

"1000000000" "No" "M"

"1000000000" "No" "M"

"1000000000" "No" "M"

"1000000000" "No" "M"

"1000100000" "No" "M"

"1000000000" "No" "F"

"1000000000" "No" "M"

"1000000000" "No" "M"

"1000000000" "No" "F"

"1000000000" "No" "M"

"1000000000" "No" "M"

"1000000000" "No" "F"

"1000000000" "No" "M"

"1000000000" "No" "F"

"1000000000" "No" "M"

"1000000000" "No" "M"

"1000000000" "No" "F"

"1000000000" "No" "M"

"1000000000" "No" "M"

"1000000000" "No" "M"

"1000000000" "No" "M"

"1000000000" "No" "M"

"1000000000" "No" "M"

"1000000000" "No" "M"

"1000000000" "No" "F"

"1000000000" "No" "M"

"1000000000" "No" "M"

"1000000000" "No" "F"

"1000000000" "No" "F"

"1000000000" "No" "F"

"1000000000" "No" "M"

"1000000000" "No" "M"

"1000000000" "No" "M"

"1000000000" "No" "M"

"1000001000" "No" "F"

"1000000000" "No" "F"

"1000000000" "No" "F"

"1000000000" "No" "F"

"1000000000" "No" "M"

"1000000000" "No" "F"

"1000000000" "No" "M"

"1000000000" "No" "M"

"1000000000" "No" "F"

"1000000000" "No" "M"

"1000000000" "No" "M"

"1000000000" "No" "M"

"1000000000" "No" "M"

"1000000000" "No" "M"

"1000000000" "No" "F"

"1100000000" "No" "F"

"1000000000" "No" "M"

"1000000000" "No" "F"

"1000000000" "No" "M"

"1000000000" "No" "F"

"1000000000" "No" "M"

"1000000000" "No" "M"

"1000000000" "No" "M"

"1000000000" "No" "M"

"1000000000" "No" "M"

"1000000000" "No" "M"

"1000000000" "No" "F"

"1000000000" "No" "F"

"1000000000" "No" "F"

"1000000000" "No" "F"

"1000000000" "No" "F"

"1000000000" "No" "F"

"1000000000" "No" "F"

"1000000000" "No" "M"

"1000000000" "No" "M"

"1100000000" "No" "F"

"1000000000" "No" "M"

"1000000000" "No" "M"

"1000000000" "No" "F"

"1100000000" "No" "F"

"1000000000" "No" "F"

"1000000000" "No" "M"

"1000000000" "No" "M"

"1000000000" "No" "F"

"1000000000" "No" "F"

"1000000000" "No" "F"

"1000000000" "No" "M"

"1000000000" "No" "M"

"1000000000" "No" "M"

"1000000000" "No" "F"

"1001000000" "No" "F"

"1000000000" "No" "M"

"1000000000" "No" "F"

"1000000000" "No" "M"

"1000000000" "No" "F"

"1000000000" "No" "F"

"1000000000" "No" "F"

"1000000000" "No" "F"

"1000000000" "No" "M"

"1000000000" "No" "M"

"1000000000" "No" "M"

"1000000000" "No" "F"

"1000000000" "No" "M"

"1000000000" "No" "M"

"1000000000" "No" "M"

"1000000000" "No" "F"

"1000000000" "No" "M"

"1000000000" "No" "M"

"1000000000" "No" "F"

"1000000000" "No" "M"

"1001000000" "No" "M"

"1100000000" "No" "M"

"1000000000" "No" "M"

"1000000000" "No" "F"

"1000000000" "No" "M"

"1000000000" "No" "M"

"1000000000" "No" "M"

"1100000000" "No" "F"

"1000100000" "No" "M"

"1000000000" "No" "M"

"1000000000" "No" "M"

"1000000000" "No" "M"

"1000000000" "No" "M"

"1000000000" "No" "M"

"1000000000" "No" "M"

"1010000000" "No" "M"

"1000000000" "No" "M"

"1000000000" "No" "M"

"1000000000" "No" "M"

"1000000000" "No" "M"

"1000000000" "No" "M"

"1000000000" "No" "M"

"1000000000" "No" "M"

"1100000000" "No" "F"

"1000000000" "No" "M"

"1000000000" "No" "M"

"1000000000" "No" "F"

"1000000000" "No" "M"

"1000000000" "No" "M"

"1000000000" "No" "M"

"1000000000" "No" "M"

"1000000000" "No" "M"

"1000000000" "No" "M"

"1000000000" "No" "M"

"1000000000" "No" "F"

"1000000000" "No" "M"

"1000000000" "No" "F"

"1000000000" "No" "F"

"1000000000" "No" "M"

"1000000000" "No" "M"

"1000000000" "No" "M"

"1000000000" "No" "F"

"1000000000" "No" "F"

"1000000000" "No" "M"

"1000000000" "No" "F"

"1000000000" "No" "F"

"1000000000" "No" "M"

"1000000000" "No" "M"

"1000000000" "No" "M"

"1000000000" "No" "M"

"1001000000" "No" "M"

"1000000000" "No" "F"

"1000000000" "No" "M"

"1000000000" "No" "M"

"1000000000" "No" "F"

"1000000000" "No" "M"

"1000000000" "No" "M"

"1000000000" "No" "F"

"1000000000" "No" "F"

"1000100000" "No" "F"

"1000000000" "No" "M"

"1000000000" "No" "F"

"1000000000" "No" "M"

"1000000000" "No" "M"

"1000000000" "No" "M"

"1000000000" "No" "M"

"1000000000" "No" "M"

"1000000000" "No" "M"

"1000000000" "No" "F"

"1000000000" "No" "M"

"1000000000" "No" "F"

"1000000000" "No" "F"

"1000000000" "No" "M"

"1000000000" "No" "F"

"1000000000" "No" "M"

"1000000000" "No" "M"

"1000000000" "No" "M"

"1000000000" "No" "M"

"1000000000" "No" "F"

"1000000000" "No" "F"

"1000000000" "No" "F"

"1000000000" "No" "F"

"1000000000" "No" "F"

"1000000000" "No" "M"

"1000000000" "No" "F"

"1000000000" "No" "M"

"1000000000" "No" "F"

"1000000000" "No" "F"

"1000000000" "No" "M"

"1000000000" "No" "F"

"1000000000" "No" "F"

"1000000000" "No" "F"

"1000000000" "No" "M"

"1000000000" "No" "M"

"1000000000" "No" "M"

"1000000000" "No" "M"

"1000000000" "No" "M"

"1000000000" "No" "M"

"1000000000" "No" "F"

"1000000000" "No" "F"

"1000000000" "No" "M"

"1000000000" "No" "F"

"1000000000" "No" "F"

"1000000000" "No" "F"

"1000000000" "No" "M"

"1000000000" "No" "M"

"1000000000" "No" "F"

"1000000000" "No" "M"

"1000000000" "No" "M"

"1000000000" "No" "M"

"1000000000" "No" "F"

"1000000000" "No" "M"

"1000000000" "No" "M"

"1000000000" "No" "F"

"1000000000" "No" "M"

"1000000000" "No" "M"

"1000000000" "No" "F"

"1000000000" "No" "F"

"1000000000" "No" "F"

"1000000000" "No" "M"

"1000000000" "No" "M"

"1000000000" "No" "M"

"1000000000" "No" "F"

"1000000000" "No" "F"

"1000000000" "No" "M"

"1001000000" "No" "M"

"1000000000" "No" "M"

"1000000000" "No" "M"

"1000000000" "No" "M"

"1000000000" "No" "F"

"1000000000" "No" "F"

"1100000000" "No" "M"

"1000000000" "No" "F"

"1000000000" "No" "M"

"1000000000" "No" "M"

"1000000000" "No" "F"

"1000000000" "No" "M"

"1000000000" "No" "F"

"1000000000" "No" "M"

"1000000000" "No" "F"

"1000000000" "No" "M"

"1000000000" "No" "M"

"1000000000" "No" "M"

"1000000000" "No" "M"

"1000000000" "No" "M"

"1000000000" "No" "F"

"1000000000" "No" "M"

"1000000000" "No" "F"

"1000000000" "No" "M"

"1100000000" "No" "M"

"1000000000" "No" "M"

"1000000000" "No" "F"

"1000000000" "No" "M"

"1000000000" "No" "F"

"1000000000" "No" "M"

"1000000000" "No" "F"

"1000000000" "No" "F"

"1000000000" "No" "M"

"1000000000" "No" "M"

"1000000000" "No" "M"

"1000000000" "No" "M"

"1000000000" "No" "M"

"1000000000" "No" "M"

"1000000000" "No" "F"

"1000000000" "No" "F"

"1000000000" "No" "M"

"1000000000" "No" "M"

"1000000000" "No" "F"

"1000000000" "No" "F"

"1100000000" "No" "M"

"1000000000" "No" "F"

"1000000000" "No" "F"

"1000000000" "No" "M"

"1000000000" "No" "F"

"1000000000" "No" "F"

"1000000000" "No" "M"

"1000000000" "No" "F"

"1000000000" "No" "M"

"1000000000" "No" "F"

"1000000000" "No" "F"

"1000000000" "No" "F"

"1000000000" "No" "M"

"1000000000" "No" "M"

"1000000000" "No" "F"

"1000000000" "No" "F"

"1000000000" "No" "F"

"1000000000" "No" "M"

"1000000000" "No" "F"

"1000000000" "No" "M"

"1000000000" "No" "M"

"1000100000" "No" "M"

"1000000000" "No" "M"

"1000000000" "No" "M"

"1000000000" "No" "M"

"1000000000" "No" "M"

"1000000000" "No" "M"

"1100000000" "No" "F"

"1000000000" "No" "F"

"1000000000" "No" "F"

"1000000000" "No" "M"

"1000000000" "No" "F"

"1000000000" "No" "M"

"1000000000" "No" "M"

"1000000000" "No" "M"

"1000000000" "No" "F"

"1000000000" "No" "M"

"1000000000" "No" "M"

"1000000000" "No" "M"

"1000000000" "No" "F"

"1000000000" "No" "F"

"1000000000" "No" "F"

"1000000000" "No" "M"

"1000000000" "No" "M"

"1000000000" "No" "M"

"1000000000" "No" "F"

"1000000000" "No" "M"

"1100000000" "No" "M"

"1100000000" "No" "M"

"1000000000" "No" "M"

"1000000000" "No" "F"

"1000000000" "No" "M"

"1000000000" "No" "M"

"1000000000" "No" "M"

"1000000000" "No" "F"

"1000000000" "No" "M"

"1000000000" "No" "M"

"1000000000" "No" "M"

"1000000000" "No" "F"

"1000000000" "No" "M"

"1000000000" "No" "M"

"1000000000" "No" "F"

"1000000000" "No" "F"

"1100000000" "No" "F"

"1000000000" "No" "M"

"1000000000" "No" "M"

"1000000000" "No" "M"

"1000000000" "No" "M"

"1000000000" "No" "M"

"1000000000" "No" "M"

"1100000000" "No" "M"

"1000000000" "No" "F"

"1000000000" "No" "M"

"1000000000" "No" "F"

"1000000000" "No" "F"

"1000000000" "No" "M"

"1000000000" "No" "F"

"1000000000" "No" "F"

"1000000000" "No" "M"

"1000000000" "No" "F"

"1000000000" "No" "M"

"1000000000" "No" "M"

"1000000000" "No" "F"

"1000000000" "No" "F"

"1000000000" "No" "F"

"1000000000" "No" "F"

"1000000000" "No" "M"

"1000000000" "No" "M"

"1000000000" "No" "M"

"1000000000" "No" "F"

"1001000000" "No" "F"

"1000000000" "No" "M"

"1000000000" "No" "F"

"1000000000" "No" "F"

"1000000000" "No" "F"

"1000000000" "No" "M"

"1000000000" "No" "M"

"1000000000" "No" "F"

"1000000000" "No" "F"

"1000000000" "No" "M"

"1000000000" "No" "M"

"1000000000" "No" "M"

"1000000000" "No" "M"

"1100000000" "No" "M"

"1000000000" "No" "F"

"1000000000" "No" "F"

"1000000000" "No" "F"

"1000000000" "No" "F"

"1000000000" "No" "F"

"1000000000" "No" "M"

"1000000000" "No" "M"

"1000000000" "No" "M"

"1000000000" "No" "F"

"1000000000" "No" "F"

"1000000000" "No" "F"

"1000000000" "No" "M"

"1100000000" "No" "M"

"1000000000" "No" "M"

"1000000000" "No" "M"

"1000000000" "No" "F"

"1000000000" "No" "M"

"1000000000" "No" "F"

"1000000000" "No" "M"

"1000000000" "No" "F"

"1000000000" "No" "M"

"1100000000" "No" "F"

"1000000000" "No" "M"

"1001000000" "No" "M"

"1000000000" "No" "F"

"1000000000" "No" "M"

"1000000000" "No" "M"

"1000000000" "No" "M"

"1000000000" "No" "M"

"1000000000" "No" "M"

"1000000000" "No" "F"

"1000000000" "No" "F"

"1000000000" "No" "F"

"1000000000" "No" "F"

"1000000000" "No" "M"

"1000000000" "No" "M"

"1000000000" "No" "M"

"1000000000" "No" "F"

"1000000000" "No" "M"

"1000000000" "No" "F"

"1000000000" "No" "F"

"1000000000" "No" "M"

"1000000000" "No" "F"

"1000000000" "No" "M"

"1000000000" "No" "F"

"1000000000" "No" "M"

"1000000000" "No" "M"

"1000000000" "No" "F"

"1000000000" "No" "M"

"1000000000" "No" "M"

"1000000000" "No" "M"

"1000000000" "No" "F"

"1000000000" "No" "M"

"1000000000" "No" "M"

"1000000000" "No" "M"

"1000000000" "No" "M"

"1000000000" "No" "M"

"1000000000" "No" "M"

"1000000000" "No" "F"

"1000000000" "No" "M"

"1000000000" "No" "M"

"1000000000" "No" "M"

"1000000000" "No" "F"

"1000000000" "No" "M"

"1000000000" "No" "M"

"1000000000" "No" "F"

"1000000000" "No" "M"

"1000000000" "No" "M"

"1000000000" "No" "M"

"1000000000" "No" "M"

"1000000000" "No" "M"

"1000000000" "No" "F"

"1000000000" "No" "M"

"1000000000" "No" "M"

"1000000000" "No" "M"

"1000000000" "No" "F"

"1000000000" "No" "M"

"1000000000" "No" "M"

"1000000000" "No" "M"

"1000000000" "No" "M"

"1000000000" "No" "F"

"1000000000" "No" "M"

"1000000000" "No" "M"

"1100000000" "No" "M"

"1000000000" "No" "M"

"1000000000" "No" "F"

"1000000000" "No" "M"

"1000000000" "No" "M"

"1000000000" "No" "F"

"1000000000" "No" "M"

"1000000000" "No" "M"

"1000000000" "No" "F"

"1000000000" "No" "F"

"1000000000" "No" "M"

"1000000000" "No" "M"

"1000000000" "No" "F"

"1000000000" "No" "M"

"1000000000" "No" "F"

"1000000000" "No" "M"

"1000000000" "No" "M"

"1000000000" "No" "M"

"1000000000" "No" "M"

"1000000000" "No" "F"

"1000000000" "No" "M"

"1000000000" "No" "M"

"1000000000" "No" "M"

"1000000000" "No" "M"

"1000000000" "No" "F"

"1000000000" "No" "M"

"1000000000" "No" "F"

"1000000000" "No" "F"

"1000000000" "No" "M"

"1000000000" "No" "M"

"1000000000" "No" "M"

"1000000000" "No" "M"

"1000000000" "No" "M"

"1000000000" "No" "F"

"1000000000" "No" "M"

"1000000000" "No" "M"

"1000000000" "No" "M"

"1100000000" "No" "M"

"1000000000" "No" "M"

"1000000000" "No" "M"

"1000000000" "No" "M"

"1000000000" "No" "F"

"1000000000" "No" "M"

"1000000000" "No" "M"

"1000000000" "No" "M"

"1000000000" "No" "M"

"1000000000" "No" "M"

"1000000000" "No" "F"

"1000000000" "No" "F"

"1000000000" "No" "M"

"1000000000" "No" "M"

"1000000000" "No" "F"

"1000000000" "No" "M"

"1000000000" "No" "M"

"1000000000" "No" "M"

"1000000000" "No" "F"

"1000000000" "No" "M"

"1000000000" "No" "F"

"1000000000" "No" "M"

"1000000000" "No" "M"

"1000000000" "No" "F"

"1000000000" "No" "F"

"1000000000" "No" "M"

"1000000000" "No" "F"

"1000000000" "No" "M"

"1000000000" "No" "F"

"1000000000" "No" "F"

"1000000000" "No" "M"

"1000000000" "No" "M"

"1000000000" "No" "F"

"1000000000" "No" "F"

"1000000000" "No" "M"

"1000000000" "No" "F"

"1000000000" "No" "M"

"1000000000" "No" "M"

"1000000000" "No" "M"

"1000000000" "No" "M"

"1000000000" "No" "F"

"1100000000" "No" "M"

"1000000000" "No" "F"

"1000000000" "No" "M"

"1000000000" "No" "F"

"1000000000" "No" "M"

"1000000000" "No" "M"

"1000000000" "No" "F"

"1000000000" "No" "M"

"1000000000" "No" "F"

"1000000000" "No" "M"

"1000000000" "No" "M"

"1000000000" "No" "M"

"1000000000" "No" "F"

"1000000000" "No" "M"

"1000000000" "No" "M"

"1000000000" "No" "F"

"1000000000" "No" "M"

"1000000000" "No" "F"

"1000000000" "No" "M"

"1000000000" "No" "M"

"1000000000" "No" "F"

"1000000000" "No" "F"

"1000000000" "No" "M"

"1000000000" "No" "M"

"1000000000" "No" "M"

"1000000000" "No" "M"

"1000000000" "No" "F"

"1000000000" "No" "M"

"1000000000" "No" "F"

"1000000000" "No" "M"

"1000000000" "No" "F"

"1000000000" "No" "F"

"1000000000" "No" "F"

"1000010000" "No" "F"

"1000000000" "No" "M"

"1000000000" "No" "M"

"1000000000" "No" "M"

"1100000000" "No" "M"

"1000000000" "No" "M"

"1100000000" "No" "M"

"1000000000" "No" "F"

"1000000000" "No" "M"

"1000000000" "No" "F"

"1000000000" "No" "M"

"1000000000" "No" "M"

"1000000000" "No" "M"

"1000000000" "No" "M"

"1000000000" "No" "M"

"1000000000" "No" "M"

"1000000000" "No" "M"

"1000000000" "No" "F"

"1000000000" "No" "F"

"1000000000" "No" "M"

"1000000000" "No" "M"

"1000000000" "No" "M"

"1000000000" "No" "F"

"1000000000" "No" "F"

"1000000000" "No" "M"

"1000000000" "No" "F"

"1000000000" "No" "F"

"1000000000" "No" "M"

"1000000000" "No" "M"

"1000000000" "No" "M"

"1000000000" "No" "M"

"1000000000" "No" "F"

"1000000000" "No" "M"

"1000000000" "No" "M"

"1000000000" "No" "M"

"1000000000" "No" "M"

"1010000000" "No" "F"

"1000000000" "No" "F"

"1000000000" "No" "M"

"1000000000" "No" "M"

"1000000000" "No" "M"

"1000000000" "No" "M"

"1000000000" "No" "M"

"1000000000" "No" "F"

"1000000000" "No" "M"

"1000000000" "No" "F"

"1000000000" "No" "F"

"1000000000" "No" "M"

"1000000000" "No" "M"

"1000000000" "No" "F"

"1000000000" "No" "F"

"1000000000" "No" "M"

"1000000000" "No" "F"

"1000000000" "No" "M"

"1000000000" "No" "M"

"1100000000" "No" "M"

"1000000000" "No" "M"

"1000000000" "No" "M"

"1000000000" "No" "F"

"1000000000" "No" "M"

"1000000000" "No" "M"

"1000000000" "No" "F"

"1000000000" "No" "F"

"1000000000" "No" "F"

"1000000000" "No" "M"

"1000000000" "No" "M"

"1000000000" "No" "M"

"1000000000" "No" "F"

"1000000000" "No" "M"

"1000000000" "No" "M"

"1000000000" "No" "F"

"1000000000" "No" "F"

"1000000000" "No" "M"

"1000000000" "No" "M"

"1000000000" "No" "M"

"1000000000" "No" "F"

"1000000000" "No" "M"

"1000000000" "No" "M"

"1000000000" "No" "M"

"1000000000" "No" "M"

"1000000000" "No" "F"

"1000000000" "No" "M"

"1000000000" "No" "M"

"1000000000" "No" "M"

"1000000000" "No" "M"

"1000000000" "No" "M"

"1000000000" "No" "M"

"1000000000" "No" "F"

"1000000000" "No" "F"

"1000000000" "No" "M"

"1000000000" "No" "M"

"1000000000" "No" "M"

"1000000000" "No" "F"

"1010000000" "No" "M"

"1000000000" "No" "M"

"1000000000" "No" "F"

"1000000000" "No" "F"

"1000000000" "No" "M"

"1000000000" "No" "F"

"1000000000" "No" "F"

"1000000000" "No" "F"

"1000000000" "No" "M"

"1000000000" "No" "M"

"1000000000" "No" "M"

"1000000000" "No" "F"

"1000000000" "No" "M"

"1000000000" "No" "F"

"1000000000" "No" "F"

"1000000000" "No" "M"

"1000000000" "No" "F"

"1000000000" "No" "F"

"1000000000" "No" "F"

"1000000000" "No" "M"

"1000000000" "No" "M"

"1000000000" "No" "F"

"1000000000" "No" "M"

"1000000000" "No" "M"

"1000000000" "No" "M"

"1000000000" "No" "F"

"1000000000" "No" "M"

"1000000000" "No" "M"

"1000000000" "No" "M"

"1000000000" "No" "M"

"1000000000" "No" "M"

"1000000000" "No" "M"

"1000000000" "No" "F"

"1000000000" "No" "M"

"1100000000" "No" "F"

"1000000000" "No" "M"

"1000000000" "No" "M"

"1000000000" "No" "M"

"1000000000" "No" "M"

"1000000000" "No" "M"

"1000000000" "No" "F"

"1100000000" "No" "F"

"1000000000" "No" "F"

"1000000000" "No" "M"

"1000000000" "No" "F"

"1000000000" "No" "M"

"1000000000" "No" "M"

"1000000000" "No" "F"

"1000000000" "No" "M"

"1000000000" "No" "M"

"1100000000" "No" "M"

"1000000000" "No" "M"

"1000000000" "No" "M"

"1000000000" "No" "M"

"1000000000" "No" "F"

"1000000000" "No" "F"

"1000000000" "No" "F"

"1000000000" "No" "F"

"1000000000" "No" "M"

"1000000000" "No" "M"

"1000000000" "No" "M"

"1000000000" "No" "M"

"1000000000" "No" "M"

"1000000000" "No" "F"

"1000000000" "No" "F"

"1000000000" "No" "M"

"1000000000" "No" "F"

"1000000000" "No" "F"

"1000000000" "No" "M"

"1000000000" "No" "M"

"1000000000" "No" "F"

"1000000000" "No" "M"

"1000000000" "No" "M"

"1000000000" "No" "M"

"1000000000" "No" "M"

"1000000000" "No" "M"

"1000000000" "No" "F"

"1000000000" "No" "M"

"1000000000" "No" "F"

"1000000000" "No" "M"

"1000000000" "No" "M"

"1000000000" "No" "M"

"1000000000" "No" "M"

"1000000000" "No" "F"

"1000000000" "No" "M"

"1000000000" "No" "M"

"1000000000" "No" "M"

"1000000000" "No" "M"

"1000000000" "No" "M"

"1000000000" "No" "M"

"1000000000" "No" "M"

"1000000000" "No" "M"

"1000000000" "No" "F"

"1000000000" "No" "M"

"1000000000" "No" "M"

"1000000000" "No" "F"

"1000000000" "No" "M"

"1000000000" "No" "F"

"1000000000" "No" "M"

"1100000000" "No" "F"

"1000000000" "No" "F"

"1000000000" "No" "F"

"1000000000" "No" "F"

"1000000000" "No" "M"

"1000000000" "No" "F"

"1000000000" "No" "M"

"1000000000" "No" "M"

"1000000000" "No" "M"

"1000000000" "No" "M"

"1000000000" "No" "F"

"1000000000" "No" "M"

"1000000000" "No" "M"

"1000000000" "No" "M"

"1000000000" "No" "M"

"1000000000" "No" "M"

"1000000000" "No" "M"

"1000000000" "No" "M"

"1000000000" "No" "F"

"1000000000" "No" "M"

"1000000000" "No" "F"

"1000000000" "No" "M"

"1000000000" "No" "F"

"1000000000" "No" "M"

"1000000000" "No" "M"

"1000000000" "No" "F"

"1000000000" "No" "M"

"1000000000" "No" "F"

"1000000000" "No" "F"

"1000000000" "No" "M"

"1000000000" "No" "F"

"1100000000" "No" "M"

"1000000000" "No" "M"

"1000000000" "No" "M"

"1000000000" "No" "M"

"1000000000" "No" "F"

"1000000000" "No" "M"

"1100000000" "No" "M"

"1000000000" "No" "M"

"1000000000" "No" "M"

"1000000000" "No" "M"

"1100000000" "No" "F"

"1000000000" "No" "M"

"1000000000" "No" "F"

"1000000000" "No" "M"

"1000000000" "No" "M"

"1000000000" "No" "M"

"1000000000" "No" "M"

"1000000000" "No" "M"

"1000000000" "No" "M"

"1000000000" "No" "M"

"1000000000" "No" "F"

"1000000000" "No" "M"

"1000000000" "No" "M"

"1000000000" "No" "M"

"1000000000" "No" "F"

"1000000000" "No" "M"

"1000000000" "No" "M"

"1000000000" "No" "F"

"1000000000" "No" "F"

"1100000000" "No" "F"

"1000000000" "No" "F"

"1000000000" "No" "M"

"1000000000" "No" "M"

"1000000000" "No" "F"

"1000000000" "No" "M"

"1000000000" "No" "F"

"1000000000" "No" "M"

"1000000000" "No" "F"

"1000000000" "No" "M"

"1000000000" "No" "M"

"1000000000" "No" "M"

"1000000000" "No" "M"

"1000000000" "No" "F"

"1000000000" "No" "M"

"1000000000" "No" "F"

"1000000000" "No" "M"

"1000000000" "No" "M"

"1000000000" "No" "M"

"1000000000" "No" "F"

"1000000000" "No" "M"

"1000000000" "No" "M"

"1000000000" "No" "F"

"1000000000" "No" "M"

"1000000000" "No" "M"

"1000000000" "No" "M"

"1000000000" "No" "M"

"1000000000" "No" "U"

"1000000000" "No" "M"

"1000000000" "No" "M"

"1100000000" "No" "U"

"1000000000" "No" "F"

"1000000000" "No" "M"

"1000000000" "No" "M"

"1000000000" "No" "M"

"1000000000" "No" "M"

"1000000000" "No" "M"

"1000000000" "No" "M"

"1000000000" "No" "M"

"1000000000" "No" "F"

"1000000000" "No" "M"

"1000000000" "No" "M"

"1100000000" "No" "F"

"1000000000" "No" "F"

"1000000000" "No" "M"

"1000000000" "No" "M"

"1000000000" "No" "F"

"1000000000" "No" "F"

"1000000000" "No" "F"

"1000000000" "No" "M"

"1000000000" "No" "M"

"1000000000" "No" "M"

"1000000000" "No" "F"

"1000000000" "No" "M"

"1000000000" "No" "M"

"1000000000" "No" "F"

"1000000000" "No" "F"

"1000000000" "No" "M"

"1000000000" "No" "M"

"1000000000" "No" "F"

"1000000000" "No" "M"

"1000000000" "No" "F"

"1000000000" "No" "M"

"1000000000" "No" "M"

"1000000000" "No" "M"

"1000000000" "No" "F"

"1000000000" "No" "M"

"1000000000" "No" "M"

"1000000000" "No" "F"

"1000000000" "No" "M"

"1000000000" "No" "M"

"1000000000" "No" "F"

"1000000000" "No" "F"

"1000000000" "No" "M"

"1000000000" "No" "F"

"1000000000" "No" "M"

"1000000000" "No" "F"

"1000000000" "No" "M"

"1000000000" "No" "F"

"1000000000" "No" "M"

"1000000000" "No" "F"

"1000000000" "No" "M"

"1000000000" "No" "M"

"1000000000" "No" "F"

"1000000000" "No" "M"

"1000000000" "No" "M"

"1000000000" "No" "M"

"1000000000" "No" "F"

"1000000000" "No" "F"

"1000000000" "No" "M"

"1000000000" "No" "F"

"1000000000" "No" "M"

"1000000000" "No" "M"

"1000000000" "No" "F"

"1001000000" "No" "F"

"1000000000" "No" "M"

"1000000000" "No" "F"

"1000000000" "No" "M"

"1000000000" "No" "M"

"1000000000" "No" "M"

"1000000000" "No" "M"

"1000000000" "No" "M"

"1000000000" "No" "M"

"1000000000" "No" "M"

"1000000000" "No" "F"

"1000000000" "No" "F"

"1000000000" "No" "M"

"1000000000" "No" "F"

"1100000000" "No" "M"

"1100000000" "No" "M"

"1000000000" "No" "F"

"1000000000" "No" "M"

"1000000000" "No" "F"

"1000000000" "No" "M"

"1000100000" "No" "M"

"1000000000" "No" "F"

"1000000000" "No" "M"

"1000000000" "No" "M"

"1000000000" "No" "M"

"1000000000" "No" "F"

"1000000000" "No" "M"

"1000000000" "No" "M"

"1000000000" "No" "M"

"1000000000" "No" "M"

"1000000000" "No" "F"

"1000000000" "No" "F"

"1000000000" "No" "M"

"1000000000" "No" "F"

"1000000000" "No" "M"

"1000000000" "No" "F"

"1000000000" "No" "M"

"1000000000" "No" "M"

"1000000000" "No" "M"

"1100000000" "No" "M"

"1000000000" "No" "M"

"1000000000" "No" "M"

"1000000000" "No" "M"

"1000000000" "No" "M"

"1000000000" "No" "M"

"1000000000" "No" "M"

"1000000000" "No" "M"

"1000000000" "No" "M"

"1000000000" "No" "F"

"1000000000" "No" "M"

"1000000000" "No" "M"

"1000000000" "No" "M"

"1000000000" "No" "M"

"1000000000" "No" "M"

"1000000000" "No" "F"

"1000000000" "No" "M"

"1000000000" "No" "M"

"1000000000" "No" "M"

"1000000000" "No" "M"

"1000000000" "No" "F"

"1000000000" "No" "F"

"1100000000" "No" "M"

"1000000000" "No" "M"

"1000000000" "No" "F"

"1000000000" "No" "M"

"1000000000" "No" "M"

"1000000000" "No" "M"

"1000000000" "No" "M"

"1000000000" "No" "M"

"1000000000" "No" "M"

"1000000000" "No" "M"

"1000000000" "No" "M"

"1000000000" "No" "F"

"1000000000" "No" "M"

"1000000000" "No" "M"

"1000000000" "No" "M"

"1000000000" "No" "F"

"1000000000" "No" "F"

"1000000000" "No" "M"

"1000000000" "No" "F"

"1000000000" "No" "F"

"1000000000" "No" "M"

"1100000000" "No" "M"

"1000000000" "No" "F"

"1000000000" "No" "M"

"1000000000" "No" "M"

"1000000000" "No" "M"

"1000000000" "No" "M"

"1000000000" "No" "M"

"1100000000" "No" "M"

"1000000000" "No" "F"

"1100000000" "No" "M"

"1000000000" "No" "F"

"1000000000" "No" "M"

"1000000000" "No" "F"

"1000000000" "No" "M"

"1000000000" "No" "M"

"1000000000" "No" "M"

"1000000000" "No" "F"

"1000000000" "No" "M"

"1000000000" "No" "M"

"1000000000" "No" "M"

"1100000000" "No" "M"

"1000000000" "No" "M"

"1100000000" "No" "M"

"1000000000" "No" "M"

"1000000000" "No" "M"

"1000000000" "No" "F"

"1000000000" "No" "M"

"1100000000" "No" "F"

"1000000000" "No" "F"

"1000000000" "No" "F"

"1000000000" "No" "M"

"1000000000" "No" "M"

"1000000000" "No" "F"

"1000000000" "No" "M"

"1000000000" "No" "F"

"1000000000" "No" "M"

"1000000000" "No" "M"

"1000000000" "No" "M"

"1000000000" "No" "M"

"1000000000" "No" "F"

"1000000000" "No" "F"

"1000000000" "No" "F"

"1000000000" "No" "F"

"1100000000" "No" "F"

"1000000000" "No" "M"

"1000000000" "No" "F"

"1000000000" "No" "M"

"1000000000" "No" "M"

"1100000000" "No" "F"

"1000010000" "No" "F"

"1000000000" "No" "M"

"1000000000" "No" "M"

"1000000000" "No" "M"

"1000000000" "No" "M"

"1100000000" "No" "M"

"1000000000" "No" "M"

"1000000000" "No" "M"

"1000000000" "No" "F"

"1000000000" "No" "M"

"1000000000" "No" "M"

"1000000000" "No" "M"

"1000000000" "No" "F"

"1000000000" "No" "F"

"1000000000" "No" "M"

"1000000000" "No" "M"

"1000000000" "No" "M"

"1000000000" "No" "M"

"1000000000" "No" "F"

"1000000000" "No" "M"

"1000000000" "No" "M"

"1100000000" "No" "M"

"1000000000" "No" "M"

"1000000000" "No" "M"

"1000000000" "No" "M"

"1000000000" "No" "M"

"1000000000" "No" "M"

"1000000000" "No" "M"

"1000000000" "No" "M"

"1000000000" "No" "M"

"1000000000" "No" "M"

"1000000000" "No" "M"

"1000000000" "No" "M"

"1000000000" "No" "M"

"1000000000" "No" "M"

"1000100000" "No" "M"

"1000000000" "No" "M"

"1100000000" "No" "M"

"1000000000" "No" "F"

"1000000000" "No" "M"

"1000000000" "No" "M"

"1000000000" "No" "M"

"1000000000" "No" "M"

"1000000000" "No" "M"

"1000000000" "No" "F"

"1000000000" "No" "M"

"1000000000" "No" "M"

"1000000000" "No" "M"

"1000000000" "No" "M"

"1000000000" "No" "M"

"1000000000" "No" "M"

"1000000000" "No" "M"

"1000000000" "No" "M"

"1000000000" "No" "M"

"1000000000" "No" "M"

"1000000000" "No" "M"

"1000000000" "No" "F"

"1000000000" "No" "M"

"1000000000" "No" "M"

"1000000000" "No" "M"

"1000000000" "No" "M"

"1010000000" "No" "M"

"1000000000" "No" "F"

"1000000000" "No" "M"

"1000000000" "No" "M"

"1000000000" "No" "M"

"1000000000" "No" "M"

"1000000000" "No" "M"

"1000000000" "No" "U"

"1000000000" "No" "F"

"1000000000" "No" "M"

"1100000000" "No" "M"

"1000000000" "No" "M"

"1000000000" "No" "M"

"1000000000" "No" "F"

"1000000000" "No" "M"

"1000000000" "No" "M"

"1000000000" "No" "M"

"1000000000" "No" "M"

"1000000000" "No" "M"

"1000000000" "No" "M"

"1000000000" "No" "F"

"1000000000" "No" "M"

"1000000000" "No" "F"

"1000000000" "No" "M"

"1000000000" "No" "M"

"1000000000" "No" "M"

"1000000000" "No" "M"

"1000000000" "No" "M"

"1000000000" "No" "F"

"1100000000" "No" "M"

"1100000000" "No" "M"

"1000000000" "No" "M"

"1000000000" "No" "M"

"1000000000" "No" "F"

"1000000000" "No" "M"

"1000000000" "No" "M"

"1000000000" "No" "M"

"1000000000" "No" "M"

"1000000000" "No" "F"

"1000000000" "No" "F"

"1000000000" "No" "F"

"1000000000" "No" "M"

"1100000000" "No" "M"

"1000000000" "No" "M"

"1100000000" "No" "M"

"1000000000" "No" "M"

"1000000000" "No" "M"

"1000000000" "No" "M"

"1000000000" "No" "M"

"1000000000" "No" "M"

"1000000000" "No" "M"

"1000000000" "No" "M"

"1000000000" "No" "M"

"1100000000" "No" "M"

"1000000000" "No" "F"

"1100000000" "No" "M"

"1000000000" "No" "M"

"1000000000" "No" "F"

"1000000000" "No" "M"

"1000000000" "No" "F"

"1000000000" "No" "M"

"1000000000" "No" "M"

"1000000000" "No" "M"

"1000000000" "No" "M"

"1000000000" "No" "M"

"1000000000" "No" "M"

"1000000000" "No" "M"

"1000000000" "No" "F"

"1000000000" "No" "F"

"1000000000" "No" "M"

"1000000000" "No" "M"

"1000000000" "No" "F"

"1000000000" "No" "M"

"1000000000" "No" "M"

"1000000000" "No" "M"

"1000000000" "No" "M"

"1000000000" "No" "M"

"1000000000" "No" "F"

"1000000000" "No" "M"

"1000000000" "No" "F"

"1000000000" "No" "M"

"1000000000" "No" "F"

"1000000000" "No" "M"

"1000000000" "No" "F"

"1000000000" "No" "M"

"1000000000" "No" "M"

"1000000000" "No" "M"

"1000000000" "No" "F"

"1000000000" "No" "M"

"1000000000" "No" "M"

"1000000000" "No" "F"

"1000000000" "No" "M"

"1000000000" "No" "M"

"1000000000" "No" "M"

"1000000000" "No" "M"

"1000000000" "No" "F"

"1000000000" "No" "M"

"1000000000" "No" "M"

"1000000000" "No" "M"

"1000000000" "No" "M"

"1000000000" "No" "M"

"1000000000" "No" "M"

"1000000000" "No" "M"

"1000000000" "No" "F"

"1000000000" "No" "F"

"1000000000" "No" "F"

"1000000000" "No" "M"

"1000000000" "No" "M"

"1000000000" "No" "M"

"1000000000" "No" "M"

"1000000000" "No" "M"

"1000000000" "No" "M"

"1000000000" "No" "F"

"1000010000" "No" "M"

"1000000000" "No" "M"

"1100000000" "No" "M"

"1000000000" "No" "M"

"1000000000" "No" "F"

"1000000000" "No" "M"

"1000000000" "No" "M"

"1000000000" "No" "F"

"1000000000" "No" "F"

"1000000000" "No" "M"

"1000000000" "No" "M"

"1000000000" "No" "M"

"1000000000" "No" "M"

"1000000000" "No" "M"

"1000000000" "No" "M"

"1000000000" "No" "M"

"1000000000" "No" "M"

"1000000000" "No" "M"

"1000000000" "No" "M"

"1000000000" "No" "M"

"1000000000" "No" "M"

"1000000000" "No" "F"

"1000000000" "No" "M"

"1000000000" "No" "M"

"1000000000" "No" "M"

"1000000000" "No" "M"

"1000000000" "No" "M"

"1001000000" "No" "M"

"1000000000" "No" "M"

"1000000000" "No" "M"

"1000000000" "No" "F"

"1000000000" "No" "M"

"1000000000" "No" "M"

"1000000000" "No" "M"

"1000000000" "No" "M"

"1000000000" "No" "M"

"1000000000" "No" "M"

"1000000000" "No" "F"

"1000000000" "No" "F"

"1000000000" "No" "F"

"1000000000" "No" "M"

"1000000000" "No" "F"

"1000000000" "No" "M"

"1000000000" "No" "M"

"1000000000" "No" "M"

"1000000000" "No" "M"

"1000000000" "No" "M"

"1000000000" "No" "M"

"1000000000" "No" "F"

"1000000000" "No" "M"

"1000000000" "No" "F"

"1000000000" "No" "M"

"1000000000" "No" "M"

"1000000000" "No" "F"

"1000000000" "No" "M"

"1000000000" "No" "M"

"1000000000" "No" "M"

"1000000000" "No" "F"

"1000000000" "No" "F"

"1000000000" "No" "M"

"1000000000" "No" "M"

"1000000000" "No" "M"

"1000000000" "No" "F"

"1000000000" "No" "M"

"1000000000" "No" "M"

"1100000000" "No" "M"

"1000000000" "No" "M"

"1000000000" "No" "M"

"1000000000" "No" "M"

"1000000000" "No" "F"

"1000000000" "No" "M"

"1000000000" "No" "M"

"1000000000" "No" "M"

"1000000000" "No" "F"

"1000000000" "No" "M"

"1000000000" "No" "M"

"1000000000" "No" "M"

"1000000000" "No" "M"

"1000000000" "No" "M"

"1000000000" "No" "F"

"1000000000" "No" "M"

"1000000000" "No" "M"

"1000000000" "No" "M"

"1000000000" "No" "M"

"1000000000" "No" "M"

"1000000000" "No" "F"

"1000000000" "No" "M"

"1000000000" "No" "M"

"1000000000" "No" "F"

"1100000000" "No" "M"

"1000000000" "No" "M"

"1000000000" "No" "M"

"1000000000" "No" "M"

"1000000000" "No" "F"

"1000000000" "No" "M"

"1000000000" "No" "M"

"1000000000" "No" "M"

"1100000000" "No" "M"

"1000000000" "No" "M"

"1000000000" "No" "M"

"1100000000" "No" "M"

"1000000000" "No" "M"

"1000000000" "No" "F"

"1000000000" "No" "M"

"1000000000" "No" "M"

"1000000000" "No" "M"

"1000000000" "No" "M"

"1000000000" "No" "M"

"1000000000" "No" "M"

"1000000000" "No" "M"

"1000000000" "No" "F"

"1000000000" "No" "M"

"1000000000" "No" "M"

"1000000000" "No" "M"

"1000000000" "No" "M"

"1000000000" "No" "M"

"1000000000" "No" "F"

"1000000000" "No" "M"

"1000000000" "No" "M"

"1000000000" "No" "F"

"1000000000" "No" "M"

"1000000000" "No" "M"

"1000000000" "No" "M"

"1000000000" "No" "M"

"1000000000" "No" "F"

"1000000000" "No" "M"

"1000000000" "No" "F"

"1000000000" "No" "M"

"1000000000" "No" "M"

"1000000000" "No" "F"

"1000000000" "No" "F"

"1000000000" "No" "M"

"1000000000" "No" "M"

"1000000000" "No" "F"

"1000000000" "No" "M"

"1000000000" "No" "F"

"1100000000" "No" "M"

"1000000000" "No" "M"

"1000000000" "No" "M"

"1000000000" "No" "M"

"1000000000" "No" "M"

"1000000000" "No" "M"

"1000000000" "No" "M"

"1000000000" "No" "F"

"1000000000" "No" "M"

"1000000000" "No" "F"

"1000000000" "No" "F"

"1000000000" "No" "F"

"1000000000" "No" "M"

"1000000000" "No" "M"

"1000000000" "No" "M"

"1000000000" "No" "F"

"1000000000" "No" "M"

"1000000000" "No" "F"

"1000000000" "No" "M"

"1000000000" "No" "M"

"1000000000" "No" "M"

"1000000000" "No" "M"

"1000000000" "No" "M"

"1000000000" "No" "F"

"1000000000" "No" "F"

"1000000000" "No" "M"

"1000000000" "No" "M"

"1100000000" "No" "M"

"1000000000" "No" "M"

"1000000000" "No" "M"

"1000000000" "No" "M"

"1000000000" "No" "F"

"1000000000" "No" "M"

"1000000000" "No" "M"

"1000000000" "No" "M"

"1000000000" "No" "F"

"1000000000" "No" "F"

"1000000000" "No" "F"

"1000000000" "No" "F"

"1000000000" "No" "M"

"1000000000" "No" "M"

"1000000000" "No" "M"

"1000000000" "No" "M"

"1000000000" "No" "M"

"1000000000" "No" "M"

"1000000000" "No" "M"

"1000000000" "No" "F"

"1000000000" "No" "M"

"1100000000" "No" "M"

"1000000000" "No" "F"

"1000000000" "No" "M"

"1000000000" "No" "F"

"1000000000" "No" "M"

"1000000000" "No" "M"

"1000000000" "No" "F"

"1100000000" "No" "M"

"1000000000" "No" "M"

"1000000000" "No" "M"

"1000000000" "No" "M"

"1000000000" "No" "M"

"1000000000" "No" "F"

"1000000000" "No" "F"

"1000000000" "No" "F"

"1000000000" "No" "F"

"1000000000" "No" "F"

"1000000000" "No" "M"

"1000000000" "No" "F"

"1100000000" "No" "M"

"1000000000" "No" "F"

"1000000000" "No" "F"

"1000000000" "No" "F"

"1000000000" "No" "M"

"1000000000" "No" "M"

"1000000000" "No" "M"

"1000000000" "No" "M"

"1000000000" "No" "M"

"1000000000" "No" "M"

"1000000000" "No" "M"

"1000000000" "No" "M"

"1000000000" "No" "M"

"1000000000" "No" "M"

"1000000000" "No" "M"

"1000000000" "No" "M"

"1000000000" "No" "F"

"1000000000" "No" "M"

"1100000000" "No" "M"

"1000000000" "No" "M"

"1000000000" "No" "M"

"1000000000" "No" "M"

"1000000000" "No" "M"

"1000000000" "No" "M"

"1000000000" "No" "F"

"1000000000" "No" "M"

"1000000000" "No" "M"

"1000000000" "No" "M"

"1000000000" "No" "M"

"1000000000" "No" "M"

"1000000000" "No" "M"

"1000000000" "No" "M"

"1000000000" "No" "M"

"1000000000" "No" "F"

"1000000000" "No" "M"

"1000000000" "No" "M"

"1000000000" "No" "M"

"1000000000" "No" "M"

"1000000000" "No" "M"

"1000000000" "No" "F"

"1000000000" "No" "M"

"1000000000" "No" "M"

"1000000000" "No" "M"

"1000000000" "No" "F"

"1000000000" "No" "F"

"1000000000" "No" "M"

"1000000000" "No" "M"

"1100000000" "No" "M"

"1000000000" "No" "M"

"1000000000" "No" "M"

"1000000000" "No" "F"

"1000000000" "No" "F"

"1000000000" "No" "M"

"1000000000" "No" "M"

"1000000000" "No" "M"

"1000000000" "No" "M"

"1000000000" "No" "F"

"1100000000" "No" "M"

"1000000000" "No" "M"

"1000000000" "No" "M"

"1000000000" "No" "M"

"1000000000" "No" "M"

"1000000000" "No" "M"

"1000000000" "No" "M"

"1000000000" "No" "M"

"1000000000" "No" "M"

"1000000000" "No" "F"

"1000000000" "No" "M"

"1000000000" "No" "M"

"1000000000" "No" "M"

"1000000000" "No" "M"

"1000000000" "No" "F"

"1000000000" "No" "F"

"1000000000" "No" "M"

"1000000000" "No" "M"

"1000000000" "No" "M"

"1000000000" "No" "M"

"1000000000" "No" "M"

"1000000000" "No" "M"

"1000000000" "No" "M"

"1000000000" "No" "M"

"1000000000" "No" "F"

"1000000000" "No" "M"

"1000000000" "No" "M"

"1000000000" "No" "M"

"1000000000" "No" "M"

"1000000000" "No" "M"

"1100000000" "No" "M"

"1000000000" "No" "F"

"1000000000" "No" "M"

"1000000000" "No" "M"

"1000000000" "No" "F"

"1000000000" "No" "M"

"1000000000" "No" "M"

"1100000000" "No" "M"

"1000000000" "No" "M"

"1000000000" "No" "F"

"1000000000" "No" "M"

"1000000000" "No" "M"

"1000000000" "No" "F"

"1000000000" "No" "M"

"1000000000" "No" "M"

"1000000000" "No" "M"

"1000000000" "No" "M"

"1000000000" "No" "M"

"1000000000" "No" "F"

"1000000000" "No" "M"

"1000000000" "No" "M"

"1000000000" "No" "F"

"1000000000" "No" "F"

"1000000000" "No" "M"

"1000000000" "No" "M"

"1000000000" "No" "F"

"1000000000" "No" "M"

"1000000000" "No" "M"

"1000000000" "No" "M"

"1000000000" "No" "M"

"1000000000" "No" "M"

"1000000000" "No" "M"

"1100000000" "No" "M"

"1000000000" "No" "F"

"1000000000" "No" "M"

"1000000000" "No" "M"

"1000000000" "No" "F"

"1000000000" "No" "M"

"1100000000" "No" "M"

"1000000000" "No" "F"

"1000000000" "No" "M"

"1000000000" "No" "M"

"1000000000" "No" "F"

"1000000000" "No" "M"

"1000000000" "No" "M"

"1100000000" "No" "F"

"1000000000" "No" "M"

"1000000000" "No" "M"

"1000000000" "No" "F"

"1000000000" "No" "M"

"1000000000" "No" "F"

"1000000000" "No" "M"

"1000000000" "No" "F"

"1000000000" "No" "M"

"1000000000" "No" "M"

"1000000000" "No" "M"

"1000000000" "No" "M"

"1000000000" "No" "M"

"1000000000" "No" "F"

"1000000000" "No" "F"

"1000000000" "No" "F"

"1000000000" "No" "M"

"1000000000" "No" "F"

"1100000000" "No" "F"

"1000000000" "No" "F"

"1000000000" "No" "F"

"1000000000" "No" "M"

"1000000000" "No" "F"

"1000000000" "No" "M"

"1000000000" "No" "M"

"1000000000" "No" "M"

"1000000000" "No" "F"

"1000000000" "No" "F"

"1000000000" "No" "F"

"1000010000" "No" "F"

"1000000000" "No" "F"

"1000000000" "No" "F"

"1000000000" "No" "M"

"1000000000" "No" "F"

"1000000000" "No" "F"

"1000000000" "No" "F"

"1100000000" "No" "M"

"1000000000" "No" "M"

"1000000000" "No" "F"

"1000000000" "No" "M"

"1000000000" "No" "F"

"1000000000" "No" "F"

"1000000000" "No" "F"

"1000000000" "No" "M"

"1000000000" "No" "M"

"1000000000" "No" "M"

"1000000000" "No" "F"

"1000000000" "No" "F"

"1000000000" "No" "M"

"1000000000" "No" "M"

"1000000000" "No" "M"

"1000000000" "No" "F"

"1000000000" "No" "M"

"1000000000" "No" "M"

"1000000000" "No" "F"

"1000000000" "No" "M"

"1000000000" "No" "M"

"1000000000" "No" "M"

"1000000000" "No" "F"

"1000000000" "No" "M"

"1100000000" "No" "F"

"1000000000" "No" "M"

"1000000000" "No" "F"

"1000000000" "No" "M"

"1000000000" "No" "M"

"1000000000" "No" "M"

"1000000000" "No" "F"

"1000000000" "No" "M"

"1000000000" "No" "M"

"1000000000" "No" "M"

"1000000000" "No" "M"

"1000000000" "No" "F"

"1000000000" "No" "M"

"1010000000" "No" "M"

"1000000000" "No" "M"

"1000000000" "No" "M"

"1000000000" "No" "F"

"1000000000" "No" "M"

"1000000000" "No" "F"

"1000000000" "No" "M"

"1000000000" "No" "F"

"1000000000" "No" "F"

"1100000000" "No" "M"

"1000000000" "No" "M"

"1000000000" "No" "F"

"1000000000" "No" "F"

"1000000000" "No" "M"

"1000000000" "No" "M"

"1000000000" "No" "F"

"1000000000" "No" "M"

"1000000000" "No" "M"

"1000000000" "No" "F"

"1000000000" "No" "F"

"1000000000" "No" "M"

"1000000000" "No" "F"

"1000000000" "No" "F"

"1000000000" "No" "M"

"1000000000" "No" "M"

"1000000000" "No" "M"

"1100000000" "No" "M"

"1100000000" "No" "M"

"1000000000" "No" "M"

"1000000000" "No" "M"

"1000000000" "No" "M"

"1000000000" "No" "M"

"1001000000" "No" "M"

"1000000000" "No" "M"

"1000000000" "No" "F"

"1000000000" "No" "M"

"1100000000" "No" "M"

"1000000000" "No" "M"

"1000000000" "No" "M"

"1000000000" "No" "M"

"1000000000" "No" "F"

"1000000000" "No" "M"

"1000000000" "No" "F"

"1000000000" "No" "M"

"1000000000" "No" "M"

"1000000000" "No" "M"

"1000000000" "No" "M"

"1000000000" "No" "M"

"1000000000" "No" "F"

"1000000000" "No" "M"

"1000000000" "No" "M"

"1000000000" "No" "M"

"1000000000" "No" "M"

"1000000000" "No" "F"

"1100000000" "No" "M"

"1000000000" "No" "M"

"1000000000" "No" "M"

"1000000000" "No" "F"

"1000000000" "No" "M"

"1000000000" "No" "F"

"1000000000" "No" "M"

"1000000000" "No" "M"

"1000000000" "No" "M"

"1100000000" "No" "M"

"1000000000" "No" "M"

"1000000000" "No" "F"

"1000000001" "No" "M"

"1000000000" "No" "M"

"1100000000" "No" "M"

"1000000000" "No" "M"

"1000000000" "No" "F"

"1000000000" "No" "M"

"1000000000" "No" "M"

"1000000000" "No" "M"

"1000000000" "No" "F"

"1000000000" "No" "F"

"1000000000" "No" "M"

"1000000000" "No" "F"

"1000000000" "No" "M"

"1000000000" "No" "F"

"1000100000" "No" "F"

"1000000000" "No" "M"

"1000000000" "No" "M"

"1000000000" "No" "F"

"1000000000" "No" "F"

"1000000000" "No" "M"

"1000000000" "No" "M"

"1000000000" "No" "F"

"1000000000" "No" "M"

"1000000000" "No" "F"

"1100000000" "No" "M"

"1000000000" "No" "M"

"1000000000" "No" "M"

"1000000000" "No" "M"

"1000000000" "No" "F"

"1000000000" "No" "M"

"1000000000" "No" "M"

"1000000000" "No" "M"

"1000000000" "No" "M"

"1000000000" "No" "M"

"1000000000" "No" "M"

"1000000000" "No" "M"

"1000000000" "No" "M"

"1000000000" "No" "F"

"1000000000" "No" "M"

"1000000000" "No" "F"

"1000000000" "No" "M"

"1100000000" "No" "M"

"1100000000" "No" "M"

"1000000000" "No" "M"

"1000000000" "No" "M"

"1000000000" "No" "F"

"1000000000" "No" "F"

"1000000000" "No" "M"

"1000000000" "No" "M"

"1000000000" "No" "F"

"1000000000" "No" "M"

"1000000000" "No" "M"

"1000000000" "No" "M"

"1000000000" "No" "M"

"1000000000" "No" "F"

"1000000000" "No" "F"

"1000000000" "No" "F"

"1000000000" "No" "M"

"1100000000" "No" "M"

"1100000000" "No" "M"

"1000000000" "No" "F"

"1000000000" "No" "F"

"1000000000" "No" "M"

"1000000000" "No" "M"

"1000000000" "No" "M"

"1000000000" "No" "M"

"1000000000" "No" "M"

"1000000000" "No" "M"

"1100000000" "No" "M"

"1000000000" "No" "M"

"1000000000" "No" "M"

"1000000000" "No" "F"

"1000000000" "No" "F"

"1000000000" "No" "F"

"1000000000" "No" "M"

"1000000000" "No" "F"

"1000000000" "No" "F"

"1001000000" "No" "M"

"1000000000" "No" "M"

"1000000000" "No" "M"

"1000000000" "No" "M"

"1000000000" "No" "M"

"1000000000" "No" "M"

"1100000000" "No" "M"

"1000000000" "No" "M"

"1000000000" "No" "M"

"1000000000" "No" "F"

"1001000000" "No" "M"

"1000000000" "No" "M"

"1000000000" "No" "M"

"1100000000" "No" "M"

"1000000000" "No" "F"

"1000000000" "No" "M"

"1000000000" "No" "F"

"1000000000" "No" "M"

"1000000000" "No" "M"

"1000000000" "No" "F"

"1000000000" "No" "F"

"1000000000" "No" "M"

"1100000000" "No" "M"

"1000000000" "No" "M"

"1000000000" "No" "M"

"1000000000" "No" "F"

"1000000000" "No" "M"

"1100000000" "No" "M"

"1000000000" "No" "F"

"1000000000" "No" "M"

"1000000000" "No" "M"

"1000000000" "No" "M"

"1000000000" "No" "M"

"1000000000" "No" "M"

"1000000000" "No" "M"

"1000000000" "No" "M"

"1000000000" "No" "M"

"1000000000" "No" "M"

"1000000000" "No" "M"

"1000000000" "No" "M"

"1000000000" "No" "M"

"1000000000" "No" "M"

"1000000000" "No" "F"

"1000000000" "No" "M"

"1000000000" "No" "M"

"1000000000" "No" "M"

"1000000000" "No" "M"

"1000000000" "No" "M"

"1000000000" "No" "M"

"1000000000" "No" "M"

"1000000000" "No" "M"

"1000000000" "No" "M"

"1000000000" "No" "M"

"1000000000" "No" "M"

"1000000000" "No" "M"

"1000000000" "No" "M"

"1000000000" "No" "M"

"1000000000" "No" "M"

"1000000000" "No" "F"

"1000000000" "No" "M"

"1000000000" "No" "M"

"1000000000" "No" "M"

"1000000000" "No" "M"

"1000000000" "No" "M"

"1000000000" "No" "M"

"1000000000" "No" "M"

"1000000000" "No" "F"

"1000000000" "No" "M"

"1000000000" "No" "M"

"1000000000" "No" "M"

"1000000000" "No" "M"

"1000000000" "No" "M"

"1000000000" "No" "M"

"1000000000" "No" "M"

"1000000000" "No" "M"

"1000000000" "No" "M"

"1000000000" "No" "M"

"1000000000" "No" "M"

"1000000000" "No" "M"

"1000000000" "No" "F"

"1000000000" "No" "M"

"1000000000" "No" "F"

"1000000000" "No" "M"

"1000000000" "No" "M"

"1000000000" "No" "M"

"1000000000" "No" "F"

"1000000000" "No" "M"

"1000000000" "No" "M"

"1100000000" "No" "M"

"1000000000" "No" "M"

"1000000000" "No" "M"

"1000000000" "No" "M"

"1000000000" "No" "M"

"1000000000" "No" "M"

"1100000000" "No" "M"

"1000000000" "No" "F"

"1000000000" "No" "M"

"1000000000" "No" "F"

"1000000000" "No" "M"

"1000000000" "No" "F"

"1000000000" "No" "M"

"1100000000" "No" "M"

"1000000000" "No" "M"

"1000000000" "No" "M"

"1000000000" "No" "M"

"1000000000" "No" "M"

"1000000000" "No" "F"

"1000000000" "No" "M"

"1100000000" "No" "M"

"1000000000" "No" "F"

"1000000000" "No" "M"

"1100000000" "No" "M"

"1000000000" "No" "M"

"1000000000" "No" "M"

"1000000000" "No" "M"

"1000000000" "No" "F"

"1000000000" "No" "F"

"1000000000" "No" "M"

"1010000000" "No" "M"

"1000000000" "No" "F"

"1000000000" "No" "F"

"1000000000" "No" "M"

"1000000000" "No" "M"

"1000100000" "No" "M"

"1000000000" "No" "M"

"1000000000" "No" "M"

"1110000000" "No" "M"

"1000000000" "No" "M"

"1000000000" "No" "F"

"1000000000" "No" "M"

"1000000000" "No" "M"

"1000000000" "No" "M"

"1000000000" "No" "M"

"1000000000" "No" "M"

"1000000000" "No" "F"

"1000000000" "No" "M"

"1000000000" "No" "M"

"1000000000" "No" "F"

"1000000000" "No" "M"

"1000000000" "No" "M"

"1000000000" "No" "M"

"1100000000" "No" "M"

"1000000000" "No" "M"

"1000000000" "No" "M"

"1000000000" "No" "M"

"1000000000" "No" "F"

"1100000000" "No" "M"

"1100000000" "No" "M"

"1000000000" "No" "M"

"1000000000" "No" "F"

"1100000000" "No" "M"

"1000000000" "No" "F"

"1100000000" "No" "M"

"1000000000" "No" "M"

"1000000000" "No" "M"

"1000000000" "No" "M"

"1000000000" "No" "F"

"1000000000" "No" "M"

"1100000000" "No" "M"

"1000000000" "No" "M"

"1000000000" "No" "M"

"1100000000" "No" "M"

"1000000000" "No" "M"

"1000000000" "No" "F"

"1001000000" "No" "M"

"1000000000" "No" "M"

"1000000000" "No" "F"

"1100000000" "No" "M"

"1000000000" "No" "M"

"1000000000" "No" "F"

"1000000000" "No" "M"

"1000000000" "No" "M"

"1000000000" "No" "M"

"1000000000" "No" "M"

"1000000000" "No" "F"

"1000000000" "No" "M"

"1000000000" "No" "M"

"1000000000" "No" "M"

"1000000000" "No" "F"

"1000000000" "No" "M"

"1000000000" "No" "M"

"1000000000" "No" "M"

"1000000000" "No" "M"

"1000000000" "No" "M"

"1000000000" "No" "M"

"1000000000" "No" "M"

"1000000000" "No" "M"

"1000000000" "No" "M"

"1000000000" "No" "M"

"1000000000" "No" "M"

"1000000000" "No" "M"

"1000000000" "No" "M"

"1000000000" "No" "M"

"1000000000" "No" "M"

"1000000000" "No" "M"

"1000000000" "No" "M"

"1000000000" "No" "M"

"1000000000" "No" "M"

"1000000000" "No" "M"

"1000000000" "No" "M"

"1000000000" "No" "M"

"1000000000" "No" "M"

"1000000000" "No" "M"

"1000000000" "No" "F"

"1000000000" "No" "M"

"1000000000" "No" "M"

"1000000000" "No" "M"

"1000000000" "No" "M"

"1100000000" "No" "M"

"1000000000" "No" "M"

"1000000000" "No" "M"

"1000000000" "No" "M"

"1000000000" "No" "M"

"1000000000" "No" "F"

"1000000000" "No" "M"

"1000000000" "No" "M"

"1000000000" "No" "M"

"1000000000" "No" "M"

"1000000000" "No" "M"

"1000000000" "No" "M"

"1000000000" "No" "M"

"1000000000" "No" "M"

"1000000000" "No" "M"

"1000000000" "No" "M"

"1000000000" "No" "M"

"1000000000" "No" "M"

"1000000000" "No" "M"

"1000000000" "No" "M"

"1000000000" "No" "M"

"1000000000" "No" "M"

"1000000000" "No" "M"

"1000000000" "No" "M"

"1000000000" "No" "F"

"1000000000" "No" "M"

"1000000000" "No" "M"

"1000000000" "No" "M"

"1000000000" "No" "M"

"1000000000" "No" "M"

"1000000000" "No" "M"

"1000000000" "No" "M"

"1000000000" "No" "F"

"1000000000" "No" "M"

"1000000000" "No" "M"

"1000000000" "No" "F"

"1000000000" "No" "M"

"1000000000" "No" "M"

"1000000000" "No" "M"

"1000000000" "No" "M"

"1000000000" "No" "M"

"1000000000" "No" "F"

"1000000000" "No" "M"

"1000000000" "No" "M"

"1000000000" "No" "M"

"1000000000" "No" "M"

"1000000000" "No" "M"

"1000000000" "No" "M"

"1000000000" "No" "M"

"1000000000" "No" "M"

"1000000000" "No" "M"

"1000000000" "No" "M"

"1000000000" "No" "F"

"1000000000" "No" "F"

"1000000000" "No" "M"

"1000000000" "No" "F"

"1000000000" "No" "M"

"1000000000" "No" "M"

"1000000000" "No" "M"

"1000000000" "No" "M"

"1000000000" "No" "M"

"1000000000" "No" "M"

"1000000000" "No" "F"

"1000000000" "No" "M"

"1000000000" "No" "M"

"1000000000" "No" "M"

"1000000000" "No" "F"

"1000000000" "No" "M"

"1000000000" "No" "F"

"1000000000" "No" "M"

"1000000000" "No" "M"

"1100000000" "No" "M"

"1100000000" "No" "M"

"1000000000" "No" "M"

"1000000000" "No" "F"

"1000000000" "No" "F"

"1100000000" "No" "M"

"1000000000" "No" "M"

"1000000000" "No" "M"

"1000000000" "No" "M"

"1000000000" "No" "M"

"1000000000" "No" "F"

"1000000000" "No" "M"

"1000000000" "No" "M"

"1000000000" "No" "F"

"1000000000" "No" "F"

"1000000000" "No" "F"

"1000000000" "No" "F"

"1000000000" "No" "M"

"1000000000" "No" "M"

"1000000000" "No" "M"

"1000000000" "No" "M"

"1000000000" "No" "M"

"1000000000" "No" "F"

"1000000000" "No" "F"

"1000000000" "No" "M"

"1100000000" "No" "M"

"1100000000" "No" "M"

"1000000000" "No" "F"

"1000000000" "No" "M"

"1000000000" "No" "F"

"1000000000" "No" "M"

"1000000000" "No" "M"

"1000000000" "No" "M"

"1000000000" "No" "F"

"1000000000" "No" "M"

"1000000000" "No" "M"

"1000000000" "No" "M"

"1000000000" "No" "F"

"1100000000" "No" "F"

"1100000000" "No" "M"

"1000000000" "No" "F"

"1000000000" "No" "M"

"1000000000" "No" "F"

"1000000000" "No" "M"

"1000000000" "No" "M"

"1000000000" "No" "F"

"1000000000" "No" "M"

"1100000000" "No" "M"

"1000000000" "No" "M"

"1000000000" "No" "F"

"1000000000" "No" "M"

"1000000000" "No" "M"

"1100000000" "No" "M"

"1100000000" "No" "M"

"1000000000" "No" "M"

"1100000000" "No" "M"

"1000000000" "No" "M"

"1000000000" "No" "F"

"1000000000" "No" "F"

"1000000000" "No" "F"

"1000000000" "No" "M"

"1000000000" "No" "F"

"1000000000" "No" "M"

"1000000000" "No" "F"

"1000000000" "No" "M"

"1000000000" "No" "M"

"1001000000" "No" "M"

"1000000000" "No" "M"

"1000000000" "No" "M"

"1000000000" "No" "M"

"1000000000" "No" "M"

"1000000000" "No" "F"

"1000000000" "No" "F"

"1000000000" "No" "M"

"1000000000" "No" "F"

"1000000000" "No" "F"

"1000000000" "No" "M"

"1000000000" "No" "F"

"1000000000" "No" "M"

"1000000000" "No" "M"

"1000000000" "No" "F"

"1000000000" "No" "M"

"1000000000" "No" "M"

"1000000000" "No" "M"

"1000000000" "No" "M"

"1000000000" "No" "M"

"1000000000" "No" "M"

"1000000000" "No" "M"

"1000000000" "No" "F"

"1000000000" "No" "M"

"1000000000" "No" "F"

"1000000000" "No" "F"

"1000000000" "No" "F"

"1000000000" "No" "M"

"1000000000" "No" "F"

"1000000000" "No" "M"

"1000000000" "No" "M"

"1000000000" "No" "M"

"1000000000" "No" "M"

"1000000000" "No" "M"

"1000000000" "No" "M"

"1100000000" "No" "F"

"1000000000" "No" "M"

"1000000000" "No" "M"

"1000000000" "No" "M"

"1000000000" "No" "M"

"1000000000" "No" "M"

"1000000000" "No" "M"

"1000000000" "No" "M"

"1000000000" "No" "M"

"1000000000" "No" "M"

"1000000000" "No" "F"

"1000000000" "No" "M"

"1000000000" "No" "M"

"1000000000" "No" "M"

"1100000000" "No" "M"

"1000000000" "No" "F"

"1000000000" "No" "M"

"1000000000" "No" "M"

"1000000000" "No" "M"

"1000000000" "No" "M"

"1000000000" "No" "M"

"1000000000" "No" "U"

"1000000000" "No" "M"

"1000000000" "No" "M"

"1000000000" "No" "M"

"1000000000" "No" "F"

"1000000000" "No" "M"

"1000000000" "No" "F"

"1000000000" "No" "M"

"1000000000" "No" "M"

"1000000000" "No" "F"

"1000000000" "No" "M"

"1000000000" "No" "M"

"1000000000" "No" "M"

"1000000000" "No" "M"

"1000000000" "No" "M"

"1000000000" "No" "M"

"1000000000" "No" "M"

"1000000000" "No" "M"

"1000000000" "No" "M"

"1000000000" "No" "M"

"1100000000" "No" "M"

"1000000000" "No" "M"

"1000000000" "No" "M"

"1000000000" "No" "F"

"1000000000" "No" "F"

"1000000000" "No" "M"

"1000000000" "No" "M"

"1000000000" "No" "M"

"1000000000" "No" "F"

"1000000000" "No" "M"

"1000000000" "No" "M"

"1000000000" "No" "M"

"1000000000" "No" "F"

"1000000000" "No" "M"

"1000000000" "No" "M"

"1000000000" "No" "F"

"1000000000" "No" "M"

"1000000000" "No" "M"

"1000000000" "No" "F"

"1000000000" "No" "M"

"1000000000" "No" "M"

"1000000000" "No" "M"

"1000000000" "No" "F"

"1000000000" "No" "M"

"1000000000" "No" "M"

"1000000000" "No" "F"

"1000000000" "No" "M"

"1000000000" "No" "F"

"1000000000" "No" "M"

"1000000000" "No" "F"

"1000000000" "No" "F"

"1000000000" "No" "M"

"1000000000" "No" "F"

"1000000000" "No" "M"

"1000000000" "No" "M"

"1000000000" "No" "F"

"1000000000" "No" "F"

"1000000000" "No" "F"

"1000000000" "No" "M"

"1000000000" "No" "M"

"1000000000" "No" "F"

"1000000000" "No" "F"

"1000000000" "No" "F"

"1000000000" "No" "F"

"1000000000" "No" "F"

"1000000000" "No" "M"

"1000000000" "No" "M"

"1000000000" "No" "M"

"1000000000" "No" "F"

"1000000000" "No" "F"

"1000000000" "No" "M"

"1000000000" "No" "M"

"1000000000" "No" "M"

"1000000000" "No" "M"

"1000000000" "No" "M"

"1000000000" "No" "M"

"1000000000" "No" "F"

"1000000000" "No" "F"

"1000000000" "No" "F"

"1000000000" "No" "M"

"1000000000" "No" "F"

"1000000000" "No" "M"

"1000000000" "No" "M"

"1000000000" "No" "F"

"1000000000" "No" "F"

"1000000000" "No" "M"

"1000000000" "No" "F"

"1000000000" "No" "M"

"1000000000" "No" "M"

"1100000000" "No" "M"

"1000000000" "No" "F"

"1000000000" "No" "F"

"1000000000" "No" "M"

"1000000000" "No" "F"

"1000100000" "No" "M"

"1000000000" "No" "M"

"1000000000" "No" "M"

"1000000000" "No" "M"

"1000000000" "No" "M"

"1000000000" "No" "M"

"1000000000" "No" "M"

"1000000000" "No" "M"

"1000000000" "No" "M"

"1000000000" "No" "M"

"1000000000" "No" "F"

"1000000000" "No" "F"

"1000000000" "No" "M"

"1000000000" "No" "M"

"1000000000" "No" "M"

"1000000000" "No" "M"

"1001000000" "No" "M"

"1000000000" "No" "F"

"1000000000" "No" "M"

"1000000000" "No" "M"

"1000000000" "No" "F"

"1000000000" "No" "M"

"1000000000" "No" "F"

"1000000000" "No" "M"

"1000000000" "No" "M"

"1000000000" "No" "M"

"1000000000" "No" "M"

"1000000000" "No" "M"

"1000000000" "No" "F"

"1000000000" "No" "M"

"1000000000" "No" "M"

"1000000000" "No" "M"

"1000000000" "No" "M"

"1000000000" "No" "M"

"1000000000" "No" "F"

"1000000000" "No" "M"

"1100000000" "No" "M"

"1000000000" "No" "M"

"1100000000" "No" "F"

"1000000000" "No" "F"

"1000000000" "No" "M"

"1000000000" "No" "F"

"1000000000" "No" "M"

"1100000000" "No" "M"

"1000000000" "No" "M"

"1000000000" "No" "M"

"1000000000" "No" "M"

"1000000000" "No" "M"

"1000000000" "No" "F"

"1000000000" "No" "F"

"1100000000" "No" "M"

"1000000000" "No" "F"

"1000000000" "No" "M"

"1000000000" "No" "M"

"1000000000" "No" "F"

"1000000000" "No" "F"

"1000000000" "No" "F"

"1000000000" "No" "F"

"1100000000" "No" "F"

"1000000000" "No" "M"

"1000000000" "No" "M"

"1000000000" "No" "M"

"1000000000" "No" "F"

"1000000000" "No" "M"

"1000000000" "No" "F"

"1000000000" "No" "M"

"1000000000" "No" "M"

"1000000000" "No" "M"

"1000000000" "No" "F"

"1000000000" "No" "M"

"1000000000" "No" "M"

"1100000000" "No" "U"

"1000000000" "No" "F"

"1000000000" "No" "F"

"1000000000" "No" "M"

"1000000000" "No" "M"

"1000000000" "No" "M"

"1000000000" "No" "F"

"1000000000" "No" "M"

"1000000000" "No" "M"

"1000000000" "No" "M"

"1000000000" "No" "F"

"1000000000" "No" "M"

"1000000000" "No" "M"

"1000000000" "No" "M"

"1000000000" "No" "F"

"1000000000" "No" "M"

"1000000000" "No" "F"

"1000000000" "No" "F"

"1000000000" "No" "M"

"1000000000" "No" "M"

"1000000000" "No" "F"

"1000000000" "No" "M"

"1000000000" "No" "M"

"1000000000" "No" "F"

"1100000000" "No" "F"

"1000000000" "No" "F"

"1000000000" "No" "M"

"1000000000" "No" "F"

"1000000000" "No" "F"

"1000000000" "No" "F"

"1000000000" "No" "M"

"1000000000" "No" "M"

"1000000000" "No" "M"

"1000000000" "No" "F"

"1000000000" "No" "F"

"1000000000" "No" "M"

"1000000000" "No" "F"

"1000000000" "No" "F"

"1000000000" "No" "M"

"1000000000" "No" "F"

"1000000000" "No" "M"

"1000000000" "No" "M"

"1000000000" "No" "M"

"1000000000" "No" "M"

"1000000000" "No" "F"

"1000000000" "No" "M"

"1000000000" "No" "M"

"1100000000" "No" "F"

"1000000000" "No" "F"

"1000000000" "No" "M"

"1000000000" "No" "M"

"1000000000" "No" "M"

"1000000000" "No" "M"

"1000000000" "No" "M"

"1000000000" "No" "F"

"1000000000" "No" "M"

"1000000000" "No" "F"

"1000000000" "No" "M"

"1000000000" "No" "M"

"1000000000" "No" "M"

"1000000000" "No" "M"

"1000000000" "No" "M"

"1000000000" "No" "M"

"1000000000" "No" "M"

"1000000000" "No" "F"

"1000000000" "No" "F"

"1000000000" "No" "M"

"1000000000" "No" "M"

"1000000000" "No" "M"

"1000000000" "No" "F"

"1000000000" "No" "M"

"1000000000" "No" "M"

"1000000000" "No" "M"

"1000000000" "No" "M"

"1000000000" "No" "M"

"1000000000" "No" "M"

"1000000000" "No" "M"

"1000000000" "No" "M"

"1000000000" "No" "M"

"1000000000" "No" "F"

"1000000000" "No" "M"

"1000000000" "No" "M"

"1000000000" "No" "M"

"1000000000" "No" "F"

"1000000000" "No" "M"

"1000000000" "No" "M"

"1000000000" "No" "M"

"1000000000" "No" "F"

"1000000000" "No" "M"

"1000000000" "No" "M"

"1000000000" "No" "F"

"1000000000" "No" "M"

"1000000000" "No" "M"

"1000000000" "No" "F"

"1000000000" "No" "M"

"1000000000" "No" "M"

"1000000000" "No" "M"

"1000000000" "No" "M"

"1000000000" "No" "M"

"1000000000" "No" "M"

"1000010000" "No" "M"

"1000000000" "No" "F"

"1000000000" "No" "F"

"1000000000" "No" "F"

"1000000000" "No" "F"

"1000000000" "No" "F"

"1000000000" "No" "M"

"1000000000" "No" "M"

"1001000000" "No" "M"

"1000000000" "No" "M"

"1000000000" "No" "F"

"1000000000" "No" "F"

"1000000000" "No" "F"

"1000000000" "No" "M"

"1000000000" "No" "M"

"1000000000" "No" "M"

"1000000000" "No" "M"

"1000000000" "No" "M"

"1000000000" "No" "F"

"1000000000" "No" "M"

"1000000000" "No" "M"

"1000000000" "No" "M"

"1000000000" "No" "F"

"1000000000" "No" "M"

"1000000000" "No" "M"

"1000000000" "No" "F"

"1000000000" "No" "F"

"1000000000" "No" "M"

"1000000000" "No" "M"

"1000000000" "No" "M"

"1000000000" "No" "F"

"1000000000" "No" "F"

"1000000000" "No" "M"

"1000000000" "No" "M"

"1000000000" "No" "F"

"1000000000" "No" "M"

"1000000000" "No" "F"

"1000000000" "No" "M"

"1000000000" "No" "F"

"1000000000" "No" "M"

"1000000000" "No" "M"

"1000000000" "No" "M"

"1000000000" "No" "M"

"1000000000" "No" "F"

"1000000000" "No" "M"

"1000000000" "No" "F"

"1000000000" "No" "M"

"1000000000" "No" "F"

"1000000000" "No" "M"

"1000000000" "No" "M"

"1000000000" "No" "M"

"1000000000" "No" "F"

"1000000000" "No" "M"

"1000000000" "No" "M"

"1000000000" "No" "M"

"1000000000" "No" "F"

"1000000000" "No" "M"

"1000000000" "No" "M"

"1000000000" "No" "M"

"1100000000" "No" "M"

"1000000000" "No" "M"

"1000000000" "No" "M"

"1000000000" "No" "F"

"1000000000" "No" "M"

"1000000000" "No" "F"

"1000000000" "No" "M"

"1000000000" "No" "F"

"1000000000" "No" "F"

"1000000000" "No" "M"

"1000000000" "No" "F"

"1000000000" "No" "F"

"1000000000" "No" "F"

"1000000000" "No" "F"

"1000000000" "No" "M"

"1000000000" "No" "M"

"1000000000" "No" "F"

"1000000000" "No" "F"

"1000000000" "No" "M"

"1000000000" "No" "M"

"1000000000" "No" "M"

"1000000000" "No" "M"

"1000000000" "No" "M"

"1000000000" "No" "M"

"1000000000" "No" "M"

"1000000000" "No" "F"

"1000000000" "No" "F"

"1000000000" "No" "M"

"1000000000" "No" "F"

"1000000000" "No" "M"

"1000000000" "No" "M"

"1000000000" "No" "M"

"1000000000" "No" "M"

"1000000000" "No" "M"

"1000000000" "No" "M"

"1000000000" "No" "F"

"1000000000" "No" "F"

"1100000000" "No" "F"

"1000000000" "No" "M"

"1000000000" "No" "M"

"1000000000" "No" "M"

"1000000000" "No" "M"

"1000000000" "No" "F"

"1000000000" "No" "M"

"1000000000" "No" "M"

"1000000000" "No" "M"

"1000000000" "No" "M"

"1000000000" "No" "M"

"1000000000" "No" "F"

"1000000000" "No" "M"

"1000000000" "No" "M"

"1000000000" "No" "M"

"1000000000" "No" "M"

"1000000000" "No" "M"

"1000000000" "No" "F"

"1000000000" "No" "M"

"1000000000" "No" "M"

"1000000000" "No" "M"

"1000000000" "No" "M"

"1000000000" "No" "F"

"1000000000" "No" "F"

"1000000000" "No" "F"

"1000000010" "No" "F"

"1000000000" "No" "F"

"1000000000" "No" "M"

"1000000000" "No" "F"

"1000000000" "No" "M"

"1100000000" "No" "M"

"1000000000" "No" "M"

"1100000000" "No" "M"

"1000000000" "No" "F"

"1000000000" "No" "M"

"1000000000" "No" "M"

"1000000000" "No" "M"

"1000000000" "No" "M"

"1000000000" "No" "F"

"1000000000" "No" "F"

"1100000000" "No" "M"

"1000000000" "No" "M"

"1000000000" "No" "M"

"1000000000" "No" "M"

"1100000000" "No" "M"

"1000000000" "No" "M"

"1000000000" "No" "M"

"1000000000" "No" "M"

"1000000000" "No" "M"

"1000000000" "No" "F"

"1000000000" "No" "F"

"1100000000" "No" "M"

"1000000000" "No" "M"

"1000000000" "No" "M"

"1100000000" "No" "M"

"1000000000" "No" "M"

"1000000000" "No" "F"

"1000000000" "No" "M"

"1000000000" "No" "F"

"1000000000" "No" "M"

"1000000000" "No" "M"

"1000000000" "No" "M"

"1000000000" "No" "M"

"1000000000" "No" "M"

"1000000000" "No" "M"

"1000000000" "No" "F"

"1000000000" "No" "M"

"1000000000" "No" "M"

"1000000000" "No" "M"

"1000000000" "No" "M"

"1000000000" "No" "M"

"1000000000" "No" "M"

"1000000000" "No" "M"

"1000000000" "No" "M"

"1000000000" "No" "M"

"1000000000" "No" "M"

"1000000000" "No" "M"

"1000000000" "No" "F"

"1000000000" "No" "M"

"1000000000" "No" "M"

"1000000000" "No" "M"

"1000000000" "No" "M"

"1000000000" "No" "M"

"1000000000" "No" "M"

"1000000000" "No" "M"

"1000000000" "No" "M"

"1000000000" "No" "M"

"1000000000" "No" "M"

"1000000000" "No" "M"

"1000000000" "No" "M"

"1000000000" "No" "M"

"1000000000" "No" "M"

"1000000000" "No" "M"

"1000000000" "No" "M"

"1000000000" "No" "M"

"1000000000" "No" "F"

"1000000000" "No" "M"

"1000000000" "No" "M"

"1000000000" "No" "M"

"1000000000" "No" "M"

"1000000000" "No" "M"

"1000000000" "No" "M"

"1000000000" "No" "M"

"1000000000" "No" "M"

"1000000000" "No" "M"

"1000000000" "No" "F"

"1000000000" "No" "F"

"1000000000" "No" "M"

"1000000000" "No" "M"

"1000000000" "No" "M"

"1000000000" "No" "M"

"1000000000" "No" "M"

"1000000000" "No" "M"

"1000000000" "No" "M"

"1100000000" "No" "M"

"1000000000" "No" "M"

"1100000000" "No" "M"

"1000000000" "No" "F"

"1100000000" "No" "M"

"1000000000" "No" "M"

"1001000000" "No" "M"

"1000000000" "No" "F"

"1000000000" "No" "M"

"1000000000" "No" "M"

"1000000000" "No" "M"

"1000000000" "No" "M"

"1000000000" "No" "M"

"1100000000" "No" "M"

"1000000000" "No" "M"

"1001000000" "No" "M"

"1000000000" "No" "M"

"1000000000" "No" "M"

"1000000000" "No" "M"

"1000000000" "No" "M"

"1000000000" "No" "M"

"1000000000" "No" "M"

"1000000000" "No" "M"

"1000000000" "No" "M"

"1000000000" "No" "M"

"1000000000" "No" "F"

"1000000000" "No" "M"

"1100000000" "No" "M"

"1000000000" "No" "F"

"1000000000" "No" "M"

"1000000000" "No" "M"

"1100000000" "No" "M"

"1000000000" "No" "F"

"1000000000" "No" "M"

"1000000000" "No" "M"

"1100000000" "No" "M"

"1000000000" "No" "M"

"1000000000" "No" "M"

"1000000000" "No" "F"

"1000000000" "No" "M"

"1000000000" "No" "M"

"1100000000" "No" "M"

"1000000000" "No" "M"

"1000000000" "No" "M"

"1000000000" "No" "M"

"1100000000" "No" "M"

"1100000000" "No" "U"

"1000000000" "No" "M"

"1000000000" "No" "M"

"1100000000" "No" "M"

"1000000000" "No" "F"

"1000000000" "No" "M"

"1100000000" "No" "M"

"1100000000" "No" "M"

"1000000000" "No" "M"

"1000000000" "No" "M"

"1000000000" "No" "M"

"1000000000" "No" "M"

"1000000000" "No" "M"

"1000000000" "No" "M"

"1000000000" "No" "M"

"1000000000" "No" "M"

"1000000000" "No" "F"

"1000000000" "No" "M"

"1000000000" "No" "F"

"1000000000" "No" "F"

"1000000000" "No" "M"

"1100000000" "No" "U"

"1000000000" "No" "M"

"1000000000" "No" "F"

"1000000000" "No" "M"

"1000000000" "No" "F"

"1000000000" "No" "M"

"1000000000" "No" "F"

"1000000000" "No" "M"

"1100000000" "No" "M"

"1000000000" "No" "M"

"1000000000" "No" "M"

"1000000000" "No" "F"

"1100000000" "No" "M"

"1000000000" "No" "M"

"1000000000" "No" "M"

"1000000000" "No" "M"

"1100000000" "No" "M"

"1000000000" "No" "M"

"1000000000" "No" "M"

"1000000000" "No" "F"

"1000000000" "No" "M"

"1000000000" "No" "F"

"1000000000" "No" "F"

"1000000000" "No" "F"

"1000000000" "No" "M"

"1000000000" "No" "F"

"1000000000" "No" "M"

"1000000000" "No" "M"

"1000000000" "No" "F"

"1000000000" "No" "M"

"1000000000" "No" "F"

"1000000000" "No" "M"

"1100000000" "No" "M"

"1000000000" "No" "M"

"1100000000" "No" "M"

"1000000000" "No" "M"

"1000000000" "No" "M"

"1000000000" "No" "M"

"1000000000" "No" "M"

"1000000000" "No" "M"

"1000000000" "No" "F"

"1000000000" "No" "M"

"1000000000" "No" "M"

"1000000000" "No" "M"

"1000000000" "No" "F"

"1100000000" "No" "F"

"1000000000" "No" "M"

"1100000000" "No" "M"

"1000000000" "No" "M"

"1000000000" "No" "M"

"1000000000" "No" "F"

"1000000000" "No" "M"

"1000000000" "No" "M"

"1000000000" "No" "M"

"1000000000" "No" "M"

"1010000000" "No" "F"

"1000000000" "No" "M"

"1000000000" "No" "M"

"1000000000" "No" "F"

"1000000000" "No" "M"

"1000000000" "No" "M"

"1000000000" "No" "M"

"1000000000" "No" "M"

"1000000000" "No" "M"

"1000000000" "No" "F"

"1000000000" "No" "F"

"1000000000" "No" "M"

"1000000000" "No" "M"

"1000000000" "No" "M"

"1000000000" "No" "M"

"1000000000" "No" "M"

"1000000000" "No" "M"

"1000000000" "No" "M"

"1000000000" "No" "M"

"1000000000" "No" "M"

"1000000000" "No" "F"

"1000000000" "No" "M"

"1000000000" "No" "F"

"1000000000" "No" "M"

"1000000000" "No" "M"

"1000000000" "No" "M"

"1000000000" "No" "M"

"1000000000" "No" "M"

"1000000000" "No" "M"

"1000000000" "No" "F"

"1000000000" "No" "M"

"1000000000" "No" "F"

"1000000000" "No" "M"

"1000000000" "No" "M"

"1000000000" "No" "M"

"1000000000" "No" "M"

"1000000000" "No" "F"

"1000000000" "No" "M"

"1000000000" "No" "M"

"1000000000" "No" "M"

"1001000000" "No" "M"

"1000000000" "No" "M"

"1000000000" "No" "M"

"1000000000" "No" "M"

"1000000000" "No" "M"

"1000000000" "No" "M"

"1000000000" "No" "M"

"1000000000" "No" "M"

"1000000000" "No" "M"

"1000000000" "No" "M"

"1000000000" "No" "M"

"1000000000" "No" "M"

"1000000000" "No" "M"

"1000000000" "No" "M"

"1000000000" "No" "M"

"1000000000" "No" "M"

"1100000000" "No" "M"

"1000000000" "No" "M"

"1000000000" "No" "M"

"1000000000" "No" "M"

"1000000000" "No" "M"

"1000000000" "No" "F"

"1000000000" "No" "M"

"1101000000" "No" "M"

"1000000000" "No" "M"

"1000000000" "No" "F"

"1000000000" "No" "M"

"1000000000" "No" "M"

"1100000000" "No" "M"

"1000000000" "No" "M"

"1000000000" "No" "M"

"1000000000" "No" "M"

"1000000000" "No" "M"

"1100000000" "No" "M"

"1000000000" "No" "M"

"1000000000" "No" "F"

"1000000000" "No" "M"

"1000000000" "No" "F"

"1000010000" "No" "M"

"1100000000" "No" "M"

"1000000000" "No" "M"

"1000000000" "No" "M"

"1000000000" "No" "M"

"1000000000" "No" "M"

"1000000000" "No" "M"

"1100000000" "No" "M"

"1000000000" "No" "M"

"1000000000" "No" "M"

"1000000000" "No" "M"

"1000000000" "No" "M"

"1000000000" "No" "M"

"1000000000" "No" "M"

"1000000000" "No" "M"

"1000000000" "No" "M"

"1000000000" "No" "F"

"1000000000" "No" "M"

"1000000000" "No" "M"

"1000000000" "No" "M"

"1000000000" "No" "M"

"1000000000" "No" "M"

"1000000000" "No" "M"

"1000000000" "No" "M"

"1000000000" "No" "M"

"1000000000" "No" "M"

"1100000000" "No" "M"

"1000000000" "No" "M"

"1000000000" "No" "M"

"1000000000" "No" "F"

"1000000000" "No" "F"

"1000000000" "No" "M"

"1000000000" "No" "M"

"1001000000" "No" "M"

"1000000000" "No" "M"

"1000000000" "No" "M"

"1000000000" "No" "M"

"1000000000" "No" "F"

"1000000000" "No" "M"

"1100000000" "No" "F"

"1000000000" "No" "M"

"1000000000" "No" "M"

"1000000000" "No" "M"

"1000010000" "No" "M"

"1000000000" "No" "M"

"1000000000" "No" "F"

"1000000000" "No" "M"

"1000000000" "No" "M"

"1000000000" "No" "M"

"1000000000" "No" "F"

"1000000000" "No" "M"

"1000000000" "No" "F"

"1000000000" "No" "M"

"1000000000" "No" "M"

"1000000000" "No" "F"

"1000000000" "No" "F"

"1000000000" "No" "M"

"1000000000" "No" "M"

"1000000000" "No" "F"

"1000000000" "No" "M"

"1000000000" "No" "M"

"1000000000" "No" "F"

"1000000000" "No" "M"

"1000000000" "No" "M"

"1000000000" "No" "M"

"1000000000" "No" "M"

"1000000000" "No" "M"

"1000000000" "No" "M"

"1000000000" "No" "M"

"1000000000" "No" "M"

"1100000000" "No" "M"

"1000000000" "No" "M"

"1000000000" "No" "M"

"1000000000" "No" "M"

"1000000000" "No" "M"

"1000000000" "No" "M"

"1000000000" "No" "M"

"1000000000" "No" "M"

"1100000000" "No" "M"

"1100000000" "No" "M"

"1000000000" "No" "F"

"1000000000" "No" "M"

"1000000000" "No" "M"

"1000000000" "No" "M"

"1000000000" "No" "M"

"1000000000" "No" "M"

"1000000000" "No" "M"

"1000000000" "No" "F"

"1000000000" "No" "M"

"1000000000" "No" "M"

"1000000000" "No" "M"

"1000000000" "No" "M"

"1000000000" "No" "M"

"1100000000" "No" "M"

"1000000000" "No" "F"

"1000000000" "No" "F"

"1000000000" "No" "M"

"1100000000" "No" "M"

"1000000000" "No" "F"

"1000000000" "No" "M"

"1000000000" "No" "M"

"1000000000" "No" "M"

"1000000000" "No" "M"

"1000000000" "No" "M"

"1000000000" "No" "M"

"1100000000" "No" "M"

"1000000000" "No" "M"

"1000000000" "No" "F"

"1000000000" "No" "M"

"1000000000" "No" "M"

"1000000000" "No" "M"

"1000000000" "No" "F"

"1000000000" "No" "M"

"1100000000" "No" "M"

"1000000000" "No" "M"

"1000000000" "No" "F"

"1000000000" "No" "M"

"1000000000" "No" "M"

"1000000000" "No" "M"

"1000000000" "No" "M"

"1000000000" "No" "M"

"1000000000" "No" "M"

"1000000000" "No" "M"

"1000000000" "No" "F"

"1001000000" "No" "M"

"1000000000" "No" "F"

"1000000000" "No" "M"

"1000000000" "No" "M"

"1000000000" "No" "F"

"1000000000" "No" "F"

"1000000000" "No" "M"

"1000000000" "No" "F"

"1000000000" "No" "F"

"1000000000" "No" "M"

"1000000000" "No" "M"

"1000000000" "No" "M"

"1000000000" "No" "M"

"1000000000" "No" "F"

"1000000000" "No" "M"

"1000000000" "No" "M"

"1000000000" "No" "M"

"1000000000" "No" "M"

"1000000000" "No" "M"

"1000000000" "No" "M"

"1000000000" "No" "M"

"1000000000" "No" "F"

"1000000000" "No" "M"

"1000000000" "No" "M"

"1000000000" "No" "M"

"1000000000" "No" "F"

"1000000000" "No" "M"

"1000000000" "No" "M"

"1000000000" "No" "M"

"1000000000" "No" "M"

"1000000000" "No" "M"

"1000000000" "No" "M"

"1000000000" "No" "M"

"1000000000" "No" "M"

"1000000000" "No" "M"

"1000000000" "No" "M"

"1000000000" "No" "M"

"1000000000" "No" "F"

"1000000000" "No" "M"

"1000000000" "No" "M"

"1000000000" "No" "F"

"1000000000" "No" "M"

"1000000000" "No" "M"

"1000000000" "No" "F"

"1000000000" "No" "M"

"1000000000" "No" "M"

"1000000000" "No" "M"

"1000000000" "No" "F"

"1000000000" "No" "M"

"1000000000" "No" "M"

"1000000000" "No" "M"

"1000000000" "No" "M"

"1000000000" "No" "F"

"1000000000" "No" "M"

"1000000000" "No" "M"

"1000000000" "No" "M"

"1000000000" "No" "M"

"1000000000" "No" "M"

"1000000000" "No" "M"

"1000000000" "No" "M"

"1000000000" "No" "M"

"1000000000" "No" "M"

"1000000000" "No" "M"

"1000000000" "No" "M"

"1000000000" "No" "M"

"1000000000" "No" "M"

"1000000000" "No" "M"

"1000000000" "No" "F"

"1000000000" "No" "M"

"1000000000" "No" "M"

"1000000000" "No" "M"

"1000000000" "No" "F"

"1000000000" "No" "M"

"1000000000" "No" "M"

"1000000000" "No" "M"

"1000000000" "No" "M"

"1000000000" "No" "M"

"1000000000" "No" "M"

"1000000000" "No" "F"

"1000000000" "No" "F"

"1000000000" "No" "M"

"1000000000" "No" "M"

"1000000000" "No" "M"

"1000000000" "No" "F"

"1000000000" "No" "M"

"1000000000" "No" "M"

"1000000000" "No" "M"

"1000000000" "No" "M"

"1000000000" "No" "M"

"1000000000" "No" "M"

"1000000000" "No" "M"

"1000000000" "No" "M"

"1000000000" "No" "M"

"1000000000" "No" "M"

"1000000000" "No" "M"

"1000000000" "No" "M"

"1000000000" "No" "M"

"1000000000" "No" "M"

"1000000000" "No" "M"

"1000000000" "No" "M"

"1000000000" "No" "F"

"1000000000" "No" "M"

"1000000000" "No" "M"

"1000000000" "No" "M"

"1000000000" "No" "M"

"1000000000" "No" "F"

"1000000000" "No" "F"

"1000000000" "No" "F"

"1000000000" "No" "M"

"1000000000" "No" "F"

"1000000000" "No" "M"

"1000000000" "No" "M"

"1000000000" "No" "M"

"1000000000" "No" "M"

"1000000000" "No" "M"

"1000000000" "No" "F"

"1000000000" "No" "M"

"1000000000" "No" "M"

"1000000000" "No" "F"

"1000000000" "No" "M"

"1000000000" "No" "M"

"1000000000" "No" "M"

"1000000000" "No" "M"

"1000000000" "No" "F"

"1000000000" "No" "F"

"1000000000" "No" "M"

"1000000000" "No" "M"

"1000000000" "No" "M"

"1000000000" "No" "M"

"1000000000" "No" "M"

"1000000000" "No" "F"

"1000000000" "No" "M"

"1000000000" "No" "M"

"1000000000" "No" "F"

"1000000000" "No" "M"

"1000000000" "No" "F"

"1000000000" "No" "F"

"1000000000" "No" "M"

"1000000000" "No" "M"

"1000000000" "No" "F"

"1000000000" "No" "F"

"1000000000" "No" "F"

"1000000000" "No" "F"

"1100000000" "No" "M"

"1000000000" "No" "F"

"1000000000" "No" "M"

"1100000000" "No" "M"

"1000000000" "No" "F"

"1000000000" "No" "M"

"1000000000" "No" "M"

"1000000000" "No" "F"

"1000000000" "No" "M"

"1000000000" "No" "F"

"1000000000" "No" "F"

"1000000000" "No" "M"

"1000000000" "No" "F"

"1000000000" "No" "M"

"1000000000" "No" "M"

"1000000000" "No" "F"

"1000000000" "No" "F"

"1000000000" "No" "F"

"1000000000" "No" "M"

"1000000000" "No" "M"

"1000000000" "No" "F"

"1000000000" "No" "M"

"1000000000" "No" "F"

"1000000000" "No" "M"

"1000000000" "No" "M"

"1000000000" "No" "F"

"1001000000" "No" "M"

"1000000000" "No" "F"

"1000000000" "No" "F"

"1000000000" "No" "F"

"1000000000" "No" "F"

"1000000000" "No" "F"

"1000000000" "No" "M"

"1000000000" "No" "M"

"1100000000" "No" "F"

"1000000000" "No" "F"

"1000000000" "No" "M"

"1000000000" "No" "M"

"1000000000" "No" "M"

"1000000000" "No" "F"

"1000000000" "No" "M"

"1000000000" "No" "M"

"1000000000" "No" "F"

"1000000000" "No" "M"

"1000000000" "No" "M"

"1000000000" "No" "F"

"1000000000" "No" "M"

"1000000000" "No" "M"

"1000000000" "No" "M"

"1000000000" "No" "M"

"1000000000" "No" "M"

"1000000000" "No" "F"

"1000000000" "No" "M"

"1000000000" "No" "F"

"1000000000" "No" "M"

"1000000000" "No" "M"

"1000000000" "No" "M"

"1000000000" "No" "M"

"1000000000" "No" "M"

"1000000000" "No" "M"

"1000000000" "No" "F"

"1000000000" "No" "M"

"1000000000" "No" "M"

"1000000000" "No" "M"

"1000000000" "No" "M"

"1000000000" "No" "M"

"1000000000" "No" "M"

"1000000000" "No" "M"

"1000000000" "No" "F"

"1000000000" "No" "M"

"1000000000" "No" "M"

"1000000000" "No" "M"

"1000000000" "No" "M"

"1000000000" "No" "M"

"1000000000" "No" "M"

"1000000000" "No" "M"

"1000000000" "No" "M"

"1000000000" "No" "M"

"1000000000" "No" "F"

"1000000000" "No" "M"

"1000000000" "No" "M"

"1000000000" "No" "M"

"1000000000" "No" "F"

"1000000000" "No" "F"

"1000000000" "No" "M"

"1000000000" "No" "M"

"1000000000" "No" "M"

"1000000000" "No" "M"

"1000000000" "No" "M"

"1000000000" "No" "M"

"1000000000" "No" "M"

"1000000000" "No" "M"

"1000000000" "No" "F"

"1000000000" "No" "M"

"1000000000" "No" "M"

"1100000000" "No" "M"

"1000000000" "No" "M"

"1000000000" "No" "M"

"1000000000" "No" "M"

"1000000000" "No" "M"

"1000000000" "No" "M"

"1000000000" "No" "M"

"1000000000" "No" "M"

"1000000000" "No" "M"

"1000000000" "No" "M"

"1000000000" "No" "M"

"1000000000" "No" "M"

"1000000000" "No" "M"

"1000000000" "No" "F"

"1100000000" "No" "M"

"1000000000" "No" "F"

"1000000000" "No" "F"

"1000000000" "No" "M"

"1000000000" "No" "M"

"1000000000" "No" "M"

"1000000000" "No" "M"

"1000000000" "No" "F"

"1100000000" "No" "M"

"1000000000" "No" "M"

"1000000000" "No" "M"

"1000000000" "No" "M"

"1000000000" "No" "M"

"1000000000" "No" "M"

"1000000000" "No" "M"

"1000000000" "No" "M"

"1000000000" "No" "M"

"1000000000" "No" "F"

"1100000000" "No" "M"

"1000000000" "No" "M"

"1000000000" "No" "M"

"1000000000" "No" "F"

"1000000000" "No" "F"

"1000000000" "No" "M"

"1100000000" "No" "M"

"1000000000" "No" "M"

"1000000000" "No" "M"

"1000000000" "No" "M"

"1000000000" "No" "F"

"1000000000" "No" "M"

"1000000000" "No" "M"

"1000000000" "No" "M"

"1000000000" "No" "M"

"1000000000" "No" "M"

"1000000000" "No" "M"

"1000000000" "No" "F"

"1000000000" "No" "M"

"1000000000" "No" "F"

"1000000000" "No" "F"

"1000000000" "No" "M"

"1000000000" "No" "M"

"1000000000" "No" "M"

"1000000000" "No" "M"

"1000000000" "No" "M"

"1000000000" "No" "M"

"1000000000" "No" "M"

"1000000000" "No" "M"

"1000000000" "No" "M"

"1000000000" "No" "F"

"1000000000" "No" "M"

"1000000000" "No" "M"

"1000000000" "No" "F"

"1000000000" "No" "M"

"1000000000" "No" "F"

"1000000000" "No" "M"

"1000000000" "No" "M"

"1000000000" "No" "M"

"1001000000" "No" "M"

"1000000000" "No" "M"

"1000000000" "No" "M"

"1000000000" "No" "F"

"1000000000" "No" "F"

"1000000000" "No" "M"

"1000000000" "No" "M"

"1000000000" "No" "M"

"1000000000" "No" "M"

"1000000000" "No" "F"

"1000000000" "No" "M"

"1000000000" "No" "F"

"1000000000" "No" "M"

"1000000000" "No" "M"

"1000000000" "No" "M"

"1000000000" "No" "M"

"1000000000" "No" "M"

"1100000000" "No" "M"

"1000000000" "No" "M"

"1000000000" "No" "F"

"1000000000" "No" "M"

"1000000000" "No" "F"

"1000000000" "No" "M"

"1000000000" "No" "M"

"1000000000" "No" "M"

"1000000000" "No" "M"

"1000000000" "No" "M"

"1000000000" "No" "M"

"1000000000" "No" "M"

"1000000000" "No" "M"

"1000000000" "No" "F"

"1000000000" "No" "M"

"1100000000" "No" "M"

"1000000000" "No" "M"

"1000000000" "No" "F"

"1000000000" "No" "M"

"1000000000" "No" "M"

"1000000000" "No" "M"

"1000000000" "No" "M"

"1000000000" "No" "F"

"1000000000" "No" "M"

"1000000000" "No" "F"

"1000000000" "No" "F"

"1000000000" "No" "M"

"1000000000" "No" "F"

"1000000000" "No" "M"

"1000000000" "No" "F"

"1000000000" "No" "M"

"1000000000" "No" "F"

"1000000000" "No" "M"

"1000000000" "No" "M"

"1000000000" "No" "F"

"1000000000" "No" "M"

"1000000000" "No" "M"

"1000000000" "No" "M"

"1000000000" "No" "M"

"1000000000" "No" "F"

"1000000000" "No" "M"

"1000000000" "No" "F"

"1000000000" "No" "F"

"1000000000" "No" "M"

"1100000000" "No" "M"

"1000000000" "No" "M"

"1000000000" "No" "M"

"1000000000" "No" "M"

"1000000000" "No" "M"

"1000000000" "No" "M"

"1010000000" "No" "M"

"1000000000" "No" "M"

"1000000000" "No" "M"

"1000000000" "No" "M"

"1000000000" "No" "M"

"1000000000" "No" "M"

"1000000000" "No" "M"

"1000000000" "No" "F"

"1000000000" "No" "M"

"1000000000" "No" "F"

"1000000000" "No" "F"

"1000000000" "No" "F"

"1000000000" "No" "F"

"1000000000" "No" "M"

"1000000000" "No" "M"

"1100000000" "No" "M"

"1000000000" "No" "M"

"1000000000" "No" "M"

"1000000000" "No" "M"

"1000000000" "No" "F"

"1000000000" "No" "M"

"1100000000" "No" "M"

"1000000000" "No" "M"

"1000000000" "No" "M"

"1000000000" "No" "M"

"1000000000" "No" "M"

"1000000000" "No" "M"

"1000000000" "No" "M"

"1000000000" "No" "M"

"1000000000" "No" "M"

"1000000000" "No" "F"

"1100000000" "No" "M"

"1000000000" "No" "M"

"1000000000" "No" "M"

"1000000000" "No" "M"

"1000000000" "No" "M"

"1000000000" "No" "M"

"1000000000" "No" "M"

"1000000000" "No" "M"

"1000000000" "No" "M"

"1000000000" "No" "M"

"1000000000" "No" "M"

"1000000000" "No" "M"

"1000000000" "No" "M"

"1000000000" "No" "M"

"1000000000" "No" "F"

"1000000000" "No" "F"

"1000000000" "No" "M"

"1000000000" "No" "M"

"1000000000" "No" "M"

"1000000000" "No" "M"

"1000000000" "No" "M"

"1000000000" "No" "M"

"1000000000" "No" "M"

"1000000000" "No" "M"

"1000000000" "No" "F"

"1000000000" "No" "M"

"1000000000" "No" "M"

"1000000000" "No" "M"

"1000000000" "No" "F"

"1000000000" "No" "M"

"1000000000" "No" "M"

"1000000000" "No" "M"

"1000000000" "No" "M"

"1000000000" "No" "F"

"1100000000" "No" "M"

"1000000000" "No" "M"

"1000000000" "No" "M"

"1000000000" "No" "M"

"1000000000" "No" "M"

"1000000000" "No" "M"

"1000000000" "No" "M"

"1000000000" "No" "M"

"1000000000" "No" "F"

"1000000000" "No" "M"

"1000000000" "No" "F"

"1000000000" "No" "M"

"1000000000" "No" "M"

"1000000000" "No" "F"

"1000000000" "No" "M"

"1000000000" "No" "M"

"1000000000" "No" "M"

"1000000000" "No" "M"

"1000000000" "No" "M"

"1000000000" "No" "M"

"1000000000" "No" "M"

"1000000000" "No" "F"

"1000000000" "No" "M"

"1000000000" "No" "M"

"1000000000" "No" "M"

"1000000000" "No" "F"

"1000000000" "No" "M"

"1000000000" "No" "M"

"1000000000" "No" "M"

"1000000000" "No" "F"

"1000000000" "No" "M"

"1000000000" "No" "M"

"1000000000" "No" "M"

"1000000000" "No" "F"

"1000000000" "No" "M"

"1000000000" "No" "M"

"1000000000" "No" "M"

"1000000000" "No" "M"

"1000000000" "No" "M"

"1000000000" "No" "M"

"1000000000" "No" "F"

"1000000000" "No" "M"

"1000000000" "No" "F"

"1000000000" "No" "M"

"1000000000" "No" "M"

"1000000000" "No" "F"

"1000000000" "No" "F"

"1000000000" "No" "M"

"1000000000" "No" "M"

"1000000000" "No" "M"

"1000000000" "No" "M"

"1000000000" "No" "M"

"1000000000" "No" "M"

"1000000000" "No" "M"

"1000000000" "No" "F"

"1000000000" "No" "M"

"1100000000" "No" "M"

"1000000000" "No" "F"

"1000000000" "No" "F"

"1000000000" "No" "F"

"1000000000" "No" "F"

"1000000010" "No" "M"

"1000000000" "No" "M"

"1000000000" "No" "M"

"1000000000" "No" "M"

"1000000000" "No" "M"

"1000000000" "No" "M"

"1000000000" "No" "M"

"1000000000" "No" "M"

"1000000000" "No" "M"

"1000000000" "No" "F"

"1000000000" "No" "F"

"1000000000" "No" "M"

"1000000000" "No" "F"

"1000000000" "No" "F"

"1000000000" "No" "M"

"1000000000" "No" "M"

"1000000000" "No" "F"

"1000000000" "No" "M"

"1100000000" "No" "U"

"1000000000" "No" "M"

"1000000000" "No" "F"

"1000000000" "No" "F"

"1100000000" "No" "M"

"1000000000" "No" "M"

"1000000000" "No" "M"

"1000000000" "No" "F"

"1000000000" "No" "F"

"1000000000" "No" "M"

"1000000000" "No" "M"

"1100000000" "No" "M"

"1000000000" "No" "M"

"1000000000" "No" "M"

"1000000000" "No" "M"

"1000000000" "No" "M"

"1100000000" "No" "U"

"1100000000" "No" "M"

"1000000000" "No" "M"

"1000000000" "No" "M"

"1000000000" "No" "M"

"1000000000" "No" "M"

"1000000000" "No" "M"

"1000000000" "No" "M"

"1000000000" "No" "F"

"1000000000" "No" "M"

"1000000000" "No" "M"

"1000000000" "No" "M"

"1000000000" "No" "M"

"1100000000" "No" "M"

"1100000000" "No" "U"

"1000000000" "No" "M"

"1000000000" "No" "M"

"1000000000" "No" "M"

"1000000000" "No" "M"

"1000000000" "No" "F"

"1000000000" "No" "M"

"1000000000" "No" "M"

"1000000000" "No" "M"

"1000000000" "No" "M"

"1000000000" "No" "M"

"1000000000" "No" "M"

"1000000000" "No" "M"

"1000000000" "No" "M"

"1000000000" "No" "M"

"1000000000" "No" "F"

"1000000000" "No" "F"

"1100000000" "No" "M"

"1000000000" "No" "M"

"1000000000" "No" "M"

"1000000000" "No" "M"

"1000000000" "No" "M"

"1000000000" "No" "M"

"1000000000" "No" "M"

"1000000000" "No" "M"

"1000000000" "No" "M"

"1000000000" "No" "M"

"1000000000" "No" "F"

"1000000000" "No" "M"

"1000000000" "No" "M"

"1100000000" "No" "M"

"1000000000" "No" "M"

"1000000000" "No" "M"

"1000000000" "No" "M"

"1000000000" "No" "M"

"1000000000" "No" "M"

"1000000000" "No" "M"

"1000000000" "No" "M"

"1000000000" "No" "M"

"1000000000" "No" "M"

"1000000000" "No" "M"

"1000000000" "No" "M"

"1100000000" "No" "M"

"1000000000" "No" "M"

"1000000000" "No" "F"

"1000000000" "No" "M"

"1000000000" "No" "M"

"1100000000" "No" "M"

"1000000000" "No" "M"

"1000000000" "No" "M"

"1000000000" "No" "F"

"1000000000" "No" "M"

"1000000000" "No" "F"

"1000000000" "No" "M"

"1000000000" "No" "M"

"1100000000" "No" "F"

"1000000000" "No" "F"

"1000000000" "No" "M"

"1000000000" "No" "M"

"1000000000" "No" "F"

"1000000000" "No" "M"

"1000000000" "No" "M"

"1000000000" "No" "M"

"1000000000" "No" "M"

"1000000000" "No" "M"

"1000000000" "No" "M"

"1000000000" "No" "M"

"1000000000" "No" "M"

"1000000000" "No" "F"

"1000000000" "No" "M"

"1000000000" "No" "M"

"1000000000" "No" "M"

"1000000000" "No" "M"

"1000000000" "No" "M"

"1000000000" "No" "M"

"1000000000" "No" "M"

"1000000000" "No" "M"

"1000000000" "No" "F"

"1000000000" "No" "M"

"1000000000" "No" "M"

"1000000000" "No" "F"

"1000000000" "No" "M"

"1000000000" "No" "F"

"1100000000" "No" "M"

"1000000000" "No" "M"

"1000000000" "No" "M"

"1000000000" "No" "M"

"1000000000" "No" "F"

"1000000000" "No" "F"

"1000000000" "No" "F"

"1000000000" "No" "M"

"1000000000" "No" "M"

"1000000000" "No" "F"

"1000000000" "No" "M"

"1000000000" "No" "M"

"1000000000" "No" "M"

"1000000000" "No" "F"

"1000000000" "No" "F"

"1000000000" "No" "F"

"1000000000" "No" "M"

"1000000000" "No" "M"

"1000000000" "No" "F"

"1000000000" "No" "F"

"1000000000" "No" "M"

"1000000000" "No" "M"

"1000000000" "No" "F"

"1000000000" "No" "M"

"1000000000" "No" "M"

"1000000000" "No" "M"

"1000010000" "No" "M"

"1000000000" "No" "F"

"1000000000" "No" "M"

"1000000000" "No" "F"

"1000000000" "No" "M"

"1000000000" "No" "M"

"1000000000" "No" "M"

"1000000000" "No" "M"

"1000000000" "No" "F"

"1000000000" "No" "F"

"1000000000" "No" "M"

"1000000000" "No" "M"

"1000000000" "No" "M"

"1100000000" "No" "F"

"1000000000" "No" "M"

"1100000000" "No" "M"

"1000000000" "No" "M"

"1000000000" "No" "M"

"1000000000" "No" "M"

"1000000000" "No" "M"

"1000000000" "No" "M"

"1000000000" "No" "M"

"1000000000" "No" "F"

"1000000000" "No" "M"

"1100000000" "No" "M"

"1000000000" "No" "M"

"1000000000" "No" "M"

"1000000000" "No" "M"

"1000000000" "No" "F"

"1000000000" "No" "M"

"1000000000" "No" "M"

"1000000000" "No" "F"

"1000000000" "No" "M"

"1000000000" "No" "M"

"1100000000" "No" "M"

"1000000000" "No" "M"

"1000000000" "No" "M"

"1000000000" "No" "F"

"1000100000" "No" "M"

"1100000000" "No" "M"

"1000000000" "No" "M"

"1100000000" "No" "M"

"1100000000" "No" "M"

"1000000000" "No" "F"

"1000000000" "No" "M"

"1000000000" "No" "M"

"1000000000" "No" "M"

"1000000000" "No" "M"

"1000000000" "No" "M"

"1000000000" "No" "M"

"1000000000" "No" "M"

"1000000000" "No" "F"

"1000000000" "No" "M"

"1000000000" "No" "M"

"1100000000" "No" "M"

"1000000000" "No" "M"

"1000000000" "No" "M"

"1000000000" "No" "M"

"1100000000" "No" "M"

"1000000000" "No" "M"

"1100000000" "No" "U"

"1010000000" "No" "M"

"1000000000" "No" "M"

"1000000000" "No" "M"

"1100000000" "No" "M"

"1100000000" "No" "M"

"1000000000" "No" "M"

"1000000000" "No" "M"

"1000000000" "No" "F"

"1000000000" "No" "M"

"1000000000" "No" "F"

"1000000000" "No" "M"

"1000000000" "No" "M"

"1000000000" "No" "M"

"1000000000" "No" "M"

"1000000000" "No" "M"

"1000000000" "No" "F"

"1000000000" "No" "M"

"1000000000" "No" "F"

"1000000000" "No" "M"

"1100000000" "No" "M"

"1000000000" "No" "M"

"1100000000" "No" "M"

"1000000000" "No" "F"

"1100000000" "No" "M"

"1000000000" "No" "M"

"1000000000" "No" "M"

"1000000000" "No" "M"

"1000000000" "No" "M"

"1000000000" "No" "M"

"1000000000" "No" "M"

"1000000000" "No" "F"

"1000000000" "No" "M"

"1000000000" "No" "M"

"1000000000" "No" "M"

"1000000000" "No" "M"

"1000000000" "No" "M"

"1000000000" "No" "F"

"1000000000" "No" "M"

"1000000000" "No" "M"

"1000000000" "No" "M"

"1000000000" "No" "M"

"1000000000" "No" "M"

"1000000000" "No" "F"

"1000000000" "No" "F"

"1000000000" "No" "F"

"1000000000" "No" "F"

"1000000000" "No" "M"

"1000000000" "No" "M"

"1000000000" "No" "M"

"1000000000" "No" "M"

"1000000000" "No" "M"

"1000000000" "No" "M"

"1100000000" "No" "M"

"1000000000" "No" "F"

"1000000000" "No" "M"

"1000000000" "No" "M"

"1000000000" "No" "M"

"1100000000" "No" "M"

"1000000000" "No" "M"

"1000000000" "No" "M"

"1000000000" "No" "M"

"1000000000" "No" "M"

"1000000000" "No" "M"

"1000000000" "No" "F"

"1000000000" "No" "M"

"1000000000" "No" "F"

"1000000000" "No" "M"

"1000000000" "No" "F"

"1000000000" "No" "M"

"1000000000" "No" "M"

"1000000000" "No" "M"

"1000000000" "No" "M"

"1000000000" "No" "M"

"1000000000" "No" "F"

"1000000000" "No" "M"

"1000000000" "No" "M"

"1001000000" "No" "M"

"1000000000" "No" "M"

"1000000000" "No" "F"

"1000000000" "No" "M"

"1000000000" "No" "F"

"1000000000" "No" "M"

"1000000000" "No" "F"

"1000000000" "No" "M"

"1000000000" "No" "M"

"1000000000" "No" "F"

"1000000000" "No" "M"

"1000000000" "No" "M"

"1000000000" "No" "M"

"1100000000" "No" "M"

"1000000000" "No" "F"

"1100000000" "No" "M"

"1100000000" "No" "M"

"1000000000" "No" "M"

"1000000000" "No" "M"

"1000000000" "No" "F"

"1000000000" "No" "M"

"1000000000" "No" "M"

"1000000000" "No" "M"

"1000000000" "No" "M"

"1000000000" "No" "M"

"1000000000" "No" "F"

"1000000000" "No" "M"

"1100000000" "No" "M"

"1000000000" "No" "M"

"1000000000" "No" "M"

"1000000000" "No" "M"

"1000000000" "No" "M"

"1000000000" "No" "F"

"1000000000" "No" "M"

"1000000000" "No" "M"

"1000100000" "No" "M"

"1000000000" "No" "M"

"1000000000" "No" "M"

"1000000000" "No" "M"

"1000000000" "No" "F"

"1000000000" "No" "M"

"1000000000" "No" "F"

"1000000000" "No" "M"

"1000000000" "No" "F"

"1100000000" "No" "M"

"1000000000" "No" "F"

"1000000000" "No" "M"

"1000000000" "No" "M"

"1100000000" "No" "M"

"1000000000" "No" "M"

"1000000000" "No" "M"

"1000000000" "No" "F"

"1100000000" "No" "M"

"1000000000" "No" "M"

"1000000000" "No" "F"

"1000000000" "No" "M"

"1000000000" "No" "F"

"1000000000" "No" "M"

"1000000000" "No" "M"

"1000000000" "No" "M"

"1000000000" "No" "M"

"1000000000" "No" "M"

"1000000000" "No" "M"

"1000000000" "No" "F"

"1000000000" "No" "M"

"1000000000" "No" "M"

"1000000000" "No" "M"

"1000000000" "No" "M"

"1000000000" "No" "M"

"1000000000" "No" "F"

"1000000000" "No" "F"

"1100000000" "No" "M"

"1000000000" "No" "M"

"1000000000" "No" "F"

"1000000000" "No" "M"

"1000000000" "No" "M"

"1000000000" "No" "M"

"1000000000" "No" "M"

"1000000000" "No" "F"

"1000000000" "No" "M"

"1000000000" "No" "M"

"1000000000" "No" "M"

"1000000000" "No" "M"

"1000000000" "No" "F"

"1100000000" "No" "F"

"1000000000" "No" "M"

"1000000000" "No" "M"

"1000000000" "No" "M"

"1000000000" "No" "F"

"1000000000" "No" "F"

"1000000000" "No" "M"

"1000000000" "No" "M"

"1000000000" "No" "M"

"1010000000" "No" "M"

"1000000000" "No" "M"

"1000000000" "No" "M"

"1000000000" "No" "M"

"1000000000" "No" "F"

"1000000000" "No" "F"

"1000000000" "No" "F"

"1000000000" "No" "M"

"1100000000" "No" "F"

"1000000000" "No" "M"

"1000000000" "No" "M"

"1100000000" "No" "M"

"1000000000" "No" "M"

"1000000000" "No" "M"

"1000000000" "No" "M"

"1000000000" "No" "M"

"1000000000" "No" "M"

"1000000000" "No" "M"

"1000000000" "No" "M"

"1000000000" "No" "F"

"1000000000" "No" "F"

"1000000000" "No" "M"

"1000000000" "No" "F"

"1000000000" "No" "M"

"1000000000" "No" "M"

"1000000000" "No" "M"

"1000000000" "No" "M"

"1000000000" "No" "M"

"1000000000" "No" "M"

"1000000000" "No" "F"

"1000000000" "No" "F"

"1000000000" "No" "U"

"1000000000" "No" "M"

"1000000000" "No" "M"

"1010000000" "No" "M"

"1000000000" "No" "M"

"1000000000" "No" "F"

"1000000000" "No" "F"

"1000000000" "No" "F"

"1100000000" "No" "U"

"1000000000" "No" "M"

"1000000000" "No" "M"

"1000000000" "No" "M"

"1000000000" "No" "F"

"1000000000" "No" "F"

"1000000000" "No" "M"

"1000000000" "No" "M"

"1000000000" "No" "M"

"1000000000" "No" "F"

"1000000000" "No" "F"

"1000000000" "No" "M"

"1000000000" "No" "M"

"1000000000" "No" "M"

"1000000000" "No" "M"

"1000000000" "No" "F"

"1000000000" "No" "M"

"1000000000" "No" "M"

"1000000000" "No" "M"

"1000000000" "No" "M"

"1000000000" "No" "M"

"1000000000" "No" "F"

"1000000000" "No" "F"

"1000000000" "No" "M"

"1000000000" "No" "F"

"1100000000" "No" "M"

"1000000000" "No" "F"

"1000000000" "No" "M"

"1000000000" "No" "F"

"1000000000" "No" "F"

"1000000000" "No" "F"

"1000000000" "No" "M"

"1000000000" "No" "M"

"1000000000" "No" "M"

"1000000000" "No" "M"

"1000000000" "No" "M"

"1000000000" "No" "M"

"1000000000" "No" "F"

"1000000000" "No" "M"

"1000000000" "No" "M"

"1000000000" "No" "F"

"1000000000" "No" "M"

"1000000000" "No" "M"

"1000000000" "No" "M"

"1000000000" "No" "M"

"1000000000" "No" "F"

"1000000000" "No" "M"

"1000000000" "No" "F"

"1000000000" "No" "F"

"1000000000" "No" "M"

"1000000000" "No" "M"

"1000000000" "No" "F"

"1000000000" "No" "F"

"1000000000" "No" "M"

"1000000000" "No" "F"

"1000000000" "No" "M"

"1000000000" "No" "M"

"1000000000" "No" "M"

"1000000000" "No" "M"

"1000000000" "No" "M"

"1000000000" "No" "M"

"1000000000" "No" "M"

"1000000000" "No" "F"

"1000000000" "No" "M"

"1000000000" "No" "F"

"1100000000" "No" "M"

"1000000000" "No" "M"

"1000000000" "No" "M"

"1000000000" "No" "M"

"1000000000" "No" "M"

"1000000000" "No" "M"

"1000000000" "No" "M"

"1000000000" "No" "M"

"1000000000" "No" "M"

"1000000000" "No" "M"

"1100000000" "No" "M"

"1000000000" "No" "M"

"1000000000" "No" "M"

"1000000000" "No" "M"

"1000000000" "No" "M"

"1000000000" "No" "M"

"1000000000" "No" "M"

"1000000000" "No" "M"

"1000000000" "No" "M"

"1000000000" "No" "M"

"1000000000" "No" "M"

"1000000000" "No" "M"

"1000000000" "No" "M"

"1000000000" "No" "M"

"1000000000" "No" "M"

"1000000000" "No" "M"

"1000000000" "No" "M"

"1000000000" "No" "F"

"1000000000" "No" "M"

"1000000000" "No" "M"

"1000000000" "No" "F"

"1000000000" "No" "M"

"1000000000" "No" "M"

"1000000000" "No" "M"

"1000000000" "No" "M"

"1000000000" "No" "M"

"1000000000" "No" "F"

"1100000000" "No" "M"

"1000000000" "No" "M"

"1000000000" "No" "F"

"1000000000" "No" "F"

"1000000000" "No" "M"

"1000000000" "No" "M"

"1000000000" "No" "F"

"1000000000" "No" "M"

"1000000000" "No" "M"

"1000000000" "No" "F"

"1000000000" "No" "F"

"1000000000" "No" "M"

"1000000000" "No" "M"

"1000000000" "No" "M"

"1000000000" "No" "M"

"1000000000" "No" "M"

"1000000000" "No" "F"

"1000000000" "No" "M"

"1000000000" "No" "F"

"1000000000" "No" "M"

"1000000000" "No" "M"

"1000000000" "No" "M"

"1000000000" "No" "F"

"1000000000" "No" "M"

"1000000000" "No" "M"

"1000000000" "No" "F"

"1000000000" "No" "M"

"1000000000" "No" "M"

"1000000000" "No" "M"

"1000000000" "No" "F"

"1000000000" "No" "M"

"1000000000" "No" "M"

"1000000000" "No" "M"

"1000000000" "No" "M"

"1000000000" "No" "M"

"1000000000" "No" "M"

"1000000000" "No" "M"

"1000000000" "No" "F"

"1000000000" "No" "F"

"1000000000" "No" "M"

"1000000000" "No" "F"

"1000000000" "No" "M"

"1000000000" "No" "M"

"1000000000" "No" "M"

"1000000000" "No" "M"

"1000000000" "No" "F"

"1000000000" "No" "M"

"1000000000" "No" "M"

"1000000000" "No" "F"

"1000000000" "No" "M"

"1000000000" "No" "F"

"1000000000" "No" "M"

"1000000000" "No" "M"

"1000000000" "No" "M"

"1000000000" "No" "M"

"1000000000" "No" "M"

"1000000000" "No" "M"

"1000000000" "No" "M"

"1100000000" "No" "M"

"1000000000" "No" "M"

"1000000000" "No" "F"

"1000000000" "No" "F"

"1000000000" "No" "M"

"1100000000" "No" "U"

"1000000000" "No" "F"

"1000000000" "No" "M"

"1100000000" "No" "F"

"1000000000" "No" "M"

"1000000000" "No" "M"

"1000000000" "No" "M"

"1000000000" "No" "M"

"1000000000" "No" "M"

"1000000000" "No" "M"

"1000000000" "No" "M"

"1000000000" "No" "M"

"1000000000" "No" "F"

"1000000000" "No" "F"

"1000000000" "No" "M"

"1000000000" "No" "F"

"1000000000" "No" "M"

"1000000000" "No" "F"

"1000000000" "No" "M"

"1000000000" "No" "F"

"1000000000" "No" "M"

"1000000000" "No" "F"

"1000000000" "No" "F"

"1000000000" "No" "M"

"1000000000" "No" "M"

"1000000000" "No" "M"

"1000000000" "No" "M"

"1000000000" "No" "F"

"1100000000" "No" "F"

"1000000000" "No" "M"

"1000000000" "No" "M"

"1000000000" "No" "M"

"1000000000" "No" "M"

"1000000000" "No" "M"

"1000000000" "No" "M"

"1000000000" "No" "M"

"1000000000" "No" "M"

"1000000000" "No" "M"

"1000000000" "No" "M"

"1000000000" "No" "M"

"1000000000" "No" "F"

"1000000000" "No" "M"

"1000000000" "No" "M"

"1000000000" "No" "F"

"1000000000" "No" "M"

"1000000000" "No" "M"

"1000000000" "No" "M"

"1000000000" "No" "M"

"1000000000" "No" "M"

"1000000000" "No" "M"

"1000000000" "No" "M"

"1000000000" "No" "M"

"1000000000" "No" "M"

"1001000000" "No" "F"

"1000000000" "No" "M"

"1000000000" "No" "M"

"1000000000" "No" "M"

"1000000000" "No" "M"

"1000000000" "No" "M"

"1000000000" "No" "M"

"1000000000" "No" "M"

"1000000000" "No" "M"

"1000000000" "No" "M"

"1000000000" "No" "F"

"1000000000" "No" "M"

"1000000000" "No" "M"

"1100000000" "No" "M"

"1000000000" "No" "M"

"1000000000" "No" "M"

"1000000000" "No" "M"

"1000000000" "No" "M"

"1010000000" "No" "M"

"1000000000" "No" "M"

"1000000000" "No" "F"

"1000000000" "No" "M"

"1000000000" "No" "M"

"1000000000" "No" "M"

"1000000000" "No" "M"

"1000000000" "No" "M"

"1000000000" "No" "F"

"1000000000" "No" "M"

"1000000000" "No" "M"

"1000000000" "No" "M"

"1000000000" "No" "M"

"1000000000" "No" "M"

"1000000000" "No" "F"

"1000000000" "No" "M"

"1000000000" "No" "M"

"1000000000" "No" "M"

"1000000000" "No" "M"

"1000000000" "No" "F"

"1000000000" "No" "M"

"1010000000" "No" "F"

"1000000000" "No" "M"

"1000000000" "No" "M"

"1000000000" "No" "M"

"1000000000" "No" "M"

"1000000000" "No" "F"

"1000000000" "No" "M"

"1100000000" "No" "M"

"1000000000" "No" "M"

"1000000000" "No" "F"

"1000000000" "No" "M"

"1000000000" "No" "M"

"1000000000" "No" "M"

"1000000000" "No" "M"

"1000000000" "No" "M"

"1000000000" "No" "F"

"1000000000" "No" "F"

"1000000000" "No" "F"

"1000000000" "No" "M"

"1000000000" "No" "M"

"1000000000" "No" "M"

"1000000000" "No" "M"

"1000000000" "No" "M"

"1000000000" "No" "F"

"1000000000" "No" "M"

"1000000000" "No" "M"

"1000000000" "No" "M"

"1000000000" "No" "F"

"1000000000" "No" "M"

"1000000000" "No" "M"

"1000000000" "No" "M"

"1000000000" "No" "M"

"1000000000" "No" "F"

"1000000000" "No" "M"

"1000000000" "No" "F"

"1000000000" "No" "M"

"1000000000" "No" "F"

"1000000000" "No" "F"

"1000000000" "No" "M"

"1000000000" "No" "F"

"1000000000" "No" "M"

"1000000000" "No" "M"

"1100000000" "No" "F"

"1000000000" "No" "M"

"1000000000" "No" "M"

"1000000000" "No" "M"

"1100000000" "No" "M"

"1000000000" "No" "M"

"1000000000" "No" "F"

"1000000000" "No" "F"

"1000000000" "No" "M"

"1000000000" "No" "F"

"1000000000" "No" "M"

"1000000000" "No" "M"

"1000000000" "No" "M"

"1000000000" "No" "F"

"1000000000" "No" "M"

"1000000000" "No" "M"

"1000000000" "No" "F"

"1000000000" "No" "M"

"1000000000" "No" "M"

"1000000000" "No" "F"

"1000000000" "No" "M"

"1000000000" "No" "F"

"1000000000" "No" "M"

"1000000000" "No" "F"

"1000000000" "No" "F"

"1100000000" "No" "M"

"1000000000" "No" "M"

"1000000000" "No" "F"

"1000000000" "No" "M"

"1000000000" "No" "M"

"1000000000" "No" "M"

"1000000000" "No" "M"

"1000000000" "No" "M"

"1000000000" "No" "M"

"1000000000" "No" "M"

"1000000000" "No" "F"

"1000000000" "No" "F"

"1000000000" "No" "F"

"1000000000" "No" "M"

"1000000000" "No" "F"

"1000000000" "No" "M"

"1000000000" "No" "M"

"1000000000" "No" "F"

"1000000000" "No" "F"

"1000000000" "No" "M"

"1000000000" "No" "F"

"1000000000" "No" "M"

"1000000000" "No" "F"

"1000000000" "No" "F"

"1000000000" "No" "M"

"1000000000" "No" "M"

"1000000000" "No" "M"

"1000000000" "No" "M"

"1000000000" "No" "M"

"1000000000" "No" "F"

"1000000000" "No" "F"

"1000000000" "No" "M"

"1000000000" "No" "F"

"1000000000" "No" "F"

"1000000000" "No" "M"

"1000000000" "No" "F"

"1000000000" "No" "M"

"1000000000" "No" "F"

"1000000000" "No" "M"

"1000000000" "No" "F"

"1000000000" "No" "M"

"1000000000" "No" "F"

"1000000000" "No" "M"

"1000000000" "No" "F"

"1000000000" "No" "M"

"1000000000" "No" "M"

"1000000000" "No" "M"

"1000000000" "No" "M"

"1000000000" "No" "F"

"1001000000" "No" "M"

"1000000000" "No" "F"

"1100000000" "No" "F"

"1000000000" "No" "M"

"1000000000" "No" "F"

"1000000000" "No" "F"

"1000000000" "No" "M"

"1000000000" "No" "F"

"1000000000" "No" "M"

"1000000000" "No" "F"

"1000000000" "No" "M"

"1000000000" "No" "F"

"1000000000" "No" "F"

"1000000000" "No" "M"

"1000000000" "No" "M"

"1000000000" "No" "M"

"1000000000" "No" "F"

"1000000000" "No" "M"

"1000000000" "No" "F"

"1000000000" "No" "F"

"1000000000" "No" "M"

"1000000000" "No" "M"

"1000000000" "No" "M"

"1000000000" "No" "F"

"1000000000" "No" "F"

"1000000000" "No" "F"

"1000000000" "No" "M"

"1000000000" "No" "M"

"1000000000" "No" "F"

"1000000000" "No" "M"

"1000000000" "No" "F"

"1000000000" "No" "M"

"1000000000" "No" "M"

"1000000000" "No" "F"

"1000000000" "No" "M"

"1000000000" "No" "F"

"1000000000" "No" "F"

"1000000000" "No" "M"

"1000000000" "No" "M"

"1000000000" "No" "M"

"1000000000" "No" "M"

"1000000000" "No" "M"

"1000000000" "No" "F"

"1000000000" "No" "M"

"1000000000" "No" "M"

"1000000000" "No" "F"

"1000000000" "No" "F"

"1000000000" "No" "M"

"1000000000" "No" "M"

"1100000000" "No" "F"

"1000000000" "No" "F"

"1000000000" "No" "M"

"1000000000" "No" "M"

"1000000000" "No" "F"

"1000000000" "No" "F"

"1000000000" "No" "M"

"1000000000" "No" "M"

"1000000000" "No" "M"

"1000000000" "No" "F"

"1000000000" "No" "F"

"1000000000" "No" "M"

"1000000000" "No" "M"

"1000000000" "No" "F"

"1000000000" "No" "F"

"1000000000" "No" "M"

"1000000000" "No" "M"

"1000000000" "No" "F"

"1000000000" "No" "F"

"1000000000" "No" "M"

"1000000000" "No" "M"

"1000000000" "No" "M"

"1000000000" "No" "F"

"1000000000" "No" "M"

"1000000000" "No" "M"

"1000000000" "No" "F"

"1000000000" "No" "F"

"1000000000" "No" "F"

"1000000000" "No" "F"

"1000100000" "No" "M"

"1000000000" "No" "F"

"1000000000" "No" "F"

"1000000000" "No" "F"

"1000000000" "No" "M"

"1000000000" "No" "M"

"1000000000" "No" "M"

"1000000000" "No" "M"

"1000000000" "No" "M"

"1000000000" "No" "F"

"1000000000" "No" "M"

"1000000000" "No" "M"

"1000000000" "No" "F"

"1000000000" "No" "M"

"1000000000" "No" "M"

"1000000000" "No" "M"

"1000000000" "No" "M"

"1000000000" "No" "M"

"1000000000" "No" "M"

"1000000000" "No" "M"

"1000000000" "No" "F"

"1000000000" "No" "M"

"1000000000" "No" "F"

"1000000000" "No" "M"

"1000000000" "No" "M"

"1000000000" "No" "M"

"1000000000" "No" "M"

"1000000000" "No" "M"

"1000000000" "No" "F"

"1000000000" "No" "M"

"1000000000" "No" "M"

"1000000000" "No" "F"

"1100000000" "No" "F"

"1001000000" "No" "F"

"1000000000" "No" "M"

"1000000000" "No" "M"

"1000000000" "No" "F"

"1000000000" "No" "F"

"1000000000" "No" "F"

"1000000000" "No" "M"

"1000000000" "No" "F"

"1100000000" "No" "M"

"1000000000" "No" "M"

"1000000000" "No" "M"

"1000000000" "No" "M"

"1000000000" "No" "F"

"1000000000" "No" "M"

"1000000000" "No" "M"

"1000000000" "No" "M"

"1000000000" "No" "M"

"1000000000" "No" "M"

"1000000000" "No" "M"

"1001000000" "No" "M"

"1000000000" "No" "M"

"1000000000" "No" "F"

"1000000000" "No" "M"

"1000000000" "No" "M"

"1000000000" "No" "F"

"1000000000" "No" "M"

"1000000000" "No" "F"

"1000000000" "No" "F"

"1000000000" "No" "M"

"1000000000" "No" "F"

"1000000000" "No" "F"

"1000000000" "No" "M"

"1000000000" "No" "M"

"1000000000" "No" "F"

"1000000000" "No" "M"

"1100000000" "No" "M"

"1001000000" "No" "M"

"1000000000" "No" "M"

"1000000000" "No" "F"

"1000000000" "No" "M"

"1000000000" "No" "F"

"1000000000" "No" "F"

"1000000000" "No" "M"

"1000000000" "No" "F"

"1000000000" "No" "M"

"1000000000" "No" "F"

"1000000000" "No" "M"

"1000000000" "No" "F"

"0000100000" "Yes" "M"

"0000100000" "Yes" "M"

"0000100000" "Yes" "M"

"0000100000" "Yes" "M"

"0000101000" "Yes" "M"

"0000100000" "Yes" "M"

"0000100000" "Yes" "M"

"0000100000" "Yes" "M"

"0000100000" "Yes" "M"

"0000100100" "Yes" "M"

"0000100000" "Yes" "M"

"0000100000" "Yes" "F"

"0000100000" "Yes" "M"

"0000100000" "Yes" "M"

"0000100000" "Yes" "M"

"0000100000" "Yes" "M"

"0000100010" "Yes" "M"

"0000100000" "Yes" "F"

"0000100000" "Yes" "M"

"0000100000" "Yes" "M"

"0000100000" "Yes" "M"

"0000100000" "Yes" "M"

"0000100000" "Yes" "M"

"0000110000" "Yes" "M"

"0000100000" "Yes" "M"

"0000100000" "Yes" "M"

"0000100000" "Yes" "M"

"0001000000" "Yes" "F"

"0000100000" "Yes" "M"

"0000100000" "Yes" "M"

"0001000000" "Yes" "F"

"0001000000" "Yes" "M"

"0001000000" "Yes" "F"

"0001000000" "Yes" "M"

"0001000000" "Yes" "F"

"0000100000" "Yes" "M"

"0000100000" "Yes" "M"

"0001000000" "Yes" "M"

"0001000100" "Yes" "M"

"0001000000" "Yes" "F"

"0001000000" "Yes" "M"

"0001000000" "Yes" "M"

"0001000000" "Yes" "F"

"0001000000" "Yes" "M"

"0001000000" "Yes" "F"

"0001000000" "Yes" "F"

"0001000000" "Yes" "M"

"0001000000" "Yes" "M"

"0001000000" "Yes" "M"

"0001000000" "Yes" "M"

"0000110000" "Yes" "F"

"0000100000" "Yes" "F"

"0000100000" "Yes" "F"

"0000100000" "Yes" "F"

"0000100000" "Yes" "M"

"0000100000" "Yes" "M"

"0000100000" "Yes" "M"

"0000100000" "Yes" "M"

"0000100000" "Yes" "F"

"0000100000" "Yes" "F"

"0000100000" "Yes" "M"

"0000100100" "Yes" "F"

"0000100000" "Yes" "F"

"0000100000" "Yes" "F"

"0000100000" "Yes" "M"

"0000100000" "Yes" "F"

"0000100000" "Yes" "M"

"0000100000" "Yes" "F"

"0000100000" "Yes" "F"

"0000100000" "Yes" "F"

"0000100000" "Yes" "F"

"0000100000" "Yes" "F"

"0000100000" "Yes" "F"

"0000100000" "Yes" "M"

"0000100000" "Yes" "F"

"0000100000" "Yes" "F"

"0000100000" "Yes" "F"

"0000100000" "Yes" "M"

"0000100000" "Yes" "M"

"0000100000" "Yes" "M"

"0000100000" "Yes" "F"

"0000100000" "Yes" "F"

"0000100000" "Yes" "M"

"0000100000" "Yes" "M"

"0000100000" "Yes" "F"

"0000100000" "Yes" "M"

"0000100000" "Yes" "M"

"0000100000" "Yes" "M"

"0000100000" "Yes" "F"

"0000100000" "Yes" "M"

"0000100000" "Yes" "M"

"0000100000" "Yes" "M"

"0000100000" "Yes" "F"

"0000100000" "Yes" "F"

"0000100000" "Yes" "M"

"0000100000" "Yes" "F"

"0000100000" "Yes" "M"

"0000100000" "Yes" "F"

"0000100000" "Yes" "F"

"0000100000" "Yes" "M"

"0000010000" "Yes" "M"

"0000010000" "Yes" "M"

"0000010000" "Yes" "M"

"0000010000" "Yes" "M"

"0000010000" "Yes" "M"

"0000010000" "Yes" "F"

"0000010000" "Yes" "F"

"0000010000" "Yes" "M"

"0000010000" "Yes" "M"

"0000010000" "Yes" "M"

"0000010000" "Yes" "F"

"0000010000" "Yes" "M"

"0000010000" "Yes" "M"

"0000010000" "Yes" "F"

"0000010000" "Yes" "F"

"0000010000" "Yes" "M"

"0000010000" "Yes" "M"

"0000010000" "Yes" "M"

"0000010000" "Yes" "F"

"0000010000" "Yes" "M"

"0000010000" "Yes" "M"

"0000010000" "Yes" "M"

"0000010000" "Yes" "M"

"0000010000" "Yes" "M"

"0000010000" "Yes" "M"

"0000010000" "Yes" "M"

"0000010000" "Yes" "M"

"0000010000" "Yes" "M"

"0000010000" "Yes" "M"

"0000011000" "Yes" "M"

"0000010000" "Yes" "M"

"0000010000" "Yes" "M"

"0000010000" "Yes" "M"

"0000010000" "Yes" "M"

"0000010000" "Yes" "M"

"0000010000" "Yes" "M"

"0000010000" "Yes" "M"

"0000010000" "Yes" "M"

"0000010000" "Yes" "M"

"0000010000" "Yes" "M"

"0000010000" "Yes" "M"

"0000011000" "Yes" "M"

"0000010000" "Yes" "M"

"0000010000" "Yes" "M"

"0000010000" "Yes" "M"

"0000010000" "Yes" "M"

"0000010000" "Yes" "M"

"0000001000" "Yes" "F"

"0000001000" "Yes" "F"

"0000001000" "Yes" "F"

"0000001000" "Yes" "F"

"0000001000" "Yes" "F"

"0000001000" "Yes" "F"

"0000001000" "Yes" "F"

"0000001000" "Yes" "F"

"0000001000" "Yes" "F"

"0000001000" "Yes" "F"

"0000001000" "Yes" "F"

"0000001000" "Yes" "F"

"0000001000" "Yes" "F"

"0000001000" "Yes" "M"

"0000001000" "Yes" "M"

"0000001000" "Yes" "M"

"0000001000" "Yes" "M"

"0000001000" "Yes" "M"

"0000001000" "Yes" "M"

"0000001100" "Yes" "M"

"0000001000" "Yes" "M"

"0000001000" "Yes" "M"

"0000001000" "Yes" "M"

"0000001000" "Yes" "M"

"0000001000" "Yes" "M"

"1000000000" "Yes" "F"

"1000000000" "Yes" "F"

"1000000000" "Yes" "F"

"1000000000" "Yes" "F"

"1000000000" "Yes" "F"

"1000000000" "Yes" "F"

"1000000000" "Yes" "F"

"1000000000" "Yes" "F"

"1000000000" "Yes" "F"

"1000000000" "Yes" "F"

"1000000000" "Yes" "F"

"1000000000" "Yes" "F"

"1000000000" "Yes" "F"

"1000000000" "Yes" "F"

"1100000000" "Yes" "F"

"1000000000" "Yes" "F"

"1000000000" "Yes" "F"

"1000000000" "Yes" "F"

"1000000000" "Yes" "F"

"1000000000" "Yes" "F"

"1000000000" "Yes" "F"

"1000000000" "Yes" "F"

"1000000000" "Yes" "F"

"1000000000" "Yes" "F"

"1000000000" "Yes" "F"

"1000000000" "Yes" "F"

"1000000000" "Yes" "F"

"1000000000" "Yes" "F"

"1000000000" "Yes" "F"

"1000000000" "Yes" "F"

"1000000000" "Yes" "F"

"1001000000" "Yes" "F"

"1000000000" "Yes" "F"

"1000000000" "Yes" "F"

"1000000000" "Yes" "F"

"1000000000" "Yes" "F"

"1000000000" "Yes" "F"

"1000000000" "Yes" "F"

"1000000000" "Yes" "F"

"1000000000" "Yes" "F"

"1000000000" "Yes" "F"

"1000000000" "Yes" "F"

"1000000000" "Yes" "F"

"1000000000" "Yes" "F"

"1100000000" "Yes" "F"

"1000000000" "Yes" "F"

"1000000000" "Yes" "F"

"1000000000" "Yes" "F"

"1000000000" "Yes" "F"

"1000000000" "Yes" "F"

"0010000000" "Yes" "F"

"0010000000" "Yes" "F"

"0010000000" "Yes" "F"

"0010000000" "Yes" "F"

"0010000000" "Yes" "F"

"0010000000" "Yes" "F"

"0010000000" "Yes" "F"

"0010000000" "Yes" "F"

"0010000000" "Yes" "F"

"0010000000" "Yes" "F"

"0010000000" "Yes" "F"

"0010000000" "Yes" "F"

"0010000000" "Yes" "F"

"0010000000" "Yes" "F"

"0010000000" "Yes" "F"

"0010000000" "Yes" "F"

"0010000000" "Yes" "F"

"0010000000" "Yes" "F"

"0010000000" "Yes" "F"

"0010000000" "Yes" "F"

"0010000000" "Yes" "F"

"0010000000" "Yes" "F"

"0010000000" "Yes" "F"

"0010000000" "Yes" "F"

"0010000000" "Yes" "F"

"0010000000" "Yes" "F"

"0010000000" "Yes" "F"

"0010000000" "Yes" "F"

"0010000000" "Yes" "F"

"0010000000" "Yes" "F"

"0010000000" "Yes" "F"

"0010000000" "Yes" "F"

"0010000000" "Yes" "F"

"0010000000" "Yes" "F"

"0010000000" "Yes" "F"

"0010000000" "Yes" "F"

"0010000000" "Yes" "F"

"0010000000" "Yes" "F"

"0010000000" "Yes" "F"

"0010000000" "Yes" "F"

"0010000000" "Yes" "F"

"0010000000" "Yes" "F"

"0010000000" "Yes" "F"

"0010000000" "Yes" "F"

"0010000000" "Yes" "F"

"0010000000" "Yes" "F"

"0011000000" "Yes" "F"

"0010000000" "Yes" "F"

"0010000000" "Yes" "F"

"0010000000" "Yes" "F"

"0010000000" "Yes" "F"

"0010000000" "Yes" "F"

"0010000000" "Yes" "F"

"0010000000" "Yes" "F"

"0010000000" "Yes" "F"

"0010000000" "Yes" "F"

"0010000000" "Yes" "F"

"0010000000" "Yes" "F"

"0010000000" "Yes" "F"

"0010000000" "Yes" "F"

"0010000000" "Yes" "F"

"0010000000" "Yes" "F"

"0010000000" "Yes" "F"

"0010000000" "Yes" "F"

"0010000000" "Yes" "F"

"0010000000" "Yes" "F"

"0010000000" "Yes" "F"

"0010000000" "Yes" "F"

"0010000000" "Yes" "F"

"0010000000" "Yes" "F"

"0010000000" "Yes" "F"

"0010000000" "Yes" "F"

"0010000000" "Yes" "F"

"0010000000" "Yes" "F"

"0010000000" "Yes" "F"

"0010000000" "Yes" "F"

"0010000000" "Yes" "F"

"0010000000" "Yes" "F"

"0010000000" "Yes" "F"

"0010000000" "Yes" "F"

"0010000000" "Yes" "F"

"0010000000" "Yes" "F"

"0010000000" "Yes" "F"

"0010000000" "Yes" "F"

"0010000000" "Yes" "F"

"0001000000" "Yes" "F"

"0001000010" "Yes" "F"

"0001000000" "Yes" "F"

"0001100001" "Yes" "F"

"0001010000" "Yes" "F"

"0001000000" "Yes" "F"

"0001000000" "Yes" "F"

"0001000000" "Yes" "F"

"0001000000" "Yes" "F"

"0001000000" "Yes" "F"

"0001000000" "Yes" "F"

"0001000000" "Yes" "F"

"0001000000" "Yes" "F"

"0001000000" "Yes" "F"

"0001000000" "Yes" "F"

"0000010000" "Yes" "M"

"0000010000" "Yes" "M"

"0000010000" "Yes" "M"

"0000010000" "Yes" "M"

"0000010000" "Yes" "M"

"0000010000" "Yes" "M"

"0000010000" "Yes" "M"

"0000010000" "Yes" "M"

"0000010000" "Yes" "M"

"0000010000" "Yes" "M"

"0000010000" "Yes" "M"

"0000010000" "Yes" "M"

"0000010000" "Yes" "M"

"0000010000" "Yes" "M"

"0000010000" "Yes" "M"

"0000010000" "Yes" "M"

"0000010000" "Yes" "M"

"0000010000" "Yes" "M"

"0000010000" "Yes" "M"

"0000010000" "Yes" "M"

"0000010000" "Yes" "M"

"0000010000" "Yes" "M"

"0000010000" "Yes" "M"

"0000001000" "Yes" "F"

"0000001000" "Yes" "F"

"0000001000" "Yes" "F"

"0000001000" "Yes" "F"

"0000001000" "Yes" "F"

"0000001000" "Yes" "F"

"0000001000" "Yes" "F"

"0000001000" "Yes" "F"

"0000001000" "Yes" "F"

"0000001000" "Yes" "F"

"0000001000" "Yes" "M"

"0000001000" "Yes" "M"

"0000001000" "Yes" "M"

"0000001000" "Yes" "M"

"0000001000" "Yes" "M"

"0000001000" "Yes" "M"

"0000001000" "Yes" "M"

"0000001000" "Yes" "M"

"0000001000" "Yes" "M"

"0000001000" "Yes" "M"

"0000001000" "Yes" "M"

"0000001000" "Yes" "M"

"0000001000" "Yes" "M"

"0000001000" "Yes" "M"

"0000001000" "Yes" "M"

"0000001000" "Yes" "M"

"0000001000" "Yes" "M"

"0000001000" "Yes" "M"

"0000001000" "Yes" "M"

"0000001000" "Yes" "M"

"0000001000" "Yes" "M"

"0000001000" "Yes" "M"

"0000001000" "Yes" "M"

"0000001000" "Yes" "M"

"0000001000" "Yes" "M"

"0000001000" "Yes" "M"

"0000001000" "Yes" "M"

"0000001010" "Yes" "M"

"0000001000" "Yes" "M"

"0000001000" "Yes" "M"

"0000001000" "Yes" "M"

"0000000001" "Yes" "F"

"0000000001" "Yes" "F"

"0000000001" "Yes" "M"

"0000000001" "Yes" "M"

"0000000001" "Yes" "F"

"0000000001" "Yes" "F"

"0000000001" "Yes" "M"

"0000000001" "Yes" "F"

"0000000001" "Yes" "F"

"0100000000" "Yes" "F"

"0100000000" "Yes" "F"

"0100000000" "Yes" "F"

"0100000000" "Yes" "F"

"0100000000" "Yes" "F"

"0100000000" "Yes" "F"

"0100000000" "Yes" "F"

"0100000000" "Yes" "F"

"0100000000" "Yes" "F"

"0100000000" "Yes" "F"

"0100000000" "Yes" "F"

"0100000000" "Yes" "F"

"0100000000" "Yes" "F"

"0100000000" "Yes" "F"

"0100000000" "Yes" "F"

"0100000000" "Yes" "F"

"0100000000" "Yes" "F"

"0100000000" "Yes" "F"

"0100000000" "Yes" "F"

"0100000000" "Yes" "F"

"0100000000" "Yes" "F"

"0100000000" "Yes" "F"

"0100000000" "Yes" "F"

"0100000000" "Yes" "F"

"0100000000" "Yes" "F"

"0100000000" "Yes" "F"

"0100000000" "Yes" "F"

"0100010000" "Yes" "F"

"0100000000" "Yes" "F"

"0100000000" "Yes" "F"

"0100000000" "Yes" "F"

"0100000000" "Yes" "F"

"0100000000" "Yes" "F"

"0100000000" "Yes" "F"

"0100000000" "Yes" "F"

"0100000000" "Yes" "F"

"0100000000" "Yes" "F"

"0100000000" "Yes" "F"

"0100000000" "Yes" "F"

"0100000000" "Yes" "F"

"0100000000" "Yes" "F"

"0100000000" "Yes" "F"

"0100000000" "Yes" "F"

"0100000000" "Yes" "F"

"0100000000" "Yes" "F"

"0100000000" "Yes" "F"

"0100000000" "Yes" "F"

"0100000000" "Yes" "F"

"0100000000" "Yes" "F"

"0100000000" "Yes" "F"

"0100000000" "Yes" "F"

"0100000000" "Yes" "U"

"0000100000" "Yes" "M"

"0000100000" "Yes" "F"

"0000100000" "Yes" "F"

"0000100000" "Yes" "M"

"0000100000" "Yes" "F"

"0000100000" "Yes" "M"

"0000100000" "Yes" "F"

"0000100000" "Yes" "F"

"0000100000" "Yes" "M"

"0000100000" "Yes" "M"

"0000100000" "Yes" "M"

"0000100000" "Yes" "F"

"0000100000" "Yes" "F"

"0000100000" "Yes" "M"

"0000100000" "Yes" "F"

"0000100000" "Yes" "F"

"0000100000" "Yes" "M"

"0000100000" "Yes" "F"

"0000100000" "Yes" "F"

"0000100000" "Yes" "F"

"0000100000" "Yes" "F"

"0000100000" "Yes" "M"

"0000100000" "Yes" "F"

"0000010000" "Yes" "M"

"0000010000" "Yes" "M"

"0000010000" "Yes" "M"

"0000010000" "Yes" "M"

"0000010100" "Yes" "M"

"0000010000" "Yes" "M"

"0000010000" "Yes" "M"

"0000010000" "Yes" "M"

"0000010000" "Yes" "M"

"0000010000" "Yes" "M"

"0000010000" "Yes" "M"

"0000010000" "Yes" "M"

"0000010000" "Yes" "M"

"0000010000" "Yes" "M"

"0000010100" "Yes" "M"

"0000010000" "Yes" "M"

"0000010000" "Yes" "M"

"0000010000" "Yes" "M"

"0000011000" "Yes" "M"

"0000010000" "Yes" "M"

"0000010000" "Yes" "M"

"0000010000" "Yes" "M"

"0000010000" "Yes" "M"

"0000010000" "Yes" "M"

"0000010000" "Yes" "M"

"0000010000" "Yes" "M"

"0000010000" "Yes" "M"

"0000010000" "Yes" "M"

"0000010000" "Yes" "M"

"0000010000" "Yes" "M"

"0000010000" "Yes" "M"

"0000010000" "Yes" "M"

"0000010000" "Yes" "M"

"0000010000" "Yes" "M"

"0000010001" "Yes" "M"

"0000011000" "Yes" "M"

"0000010000" "Yes" "M"

"0000010000" "Yes" "M"

"0000010000" "Yes" "M"

"0000010000" "Yes" "M"

"0000010000" "Yes" "M"

"0000010000" "Yes" "M"

"0000010000" "Yes" "M"

"0000010000" "Yes" "M"

"0000010000" "Yes" "M"

"0000010000" "Yes" "M"

"0000010000" "Yes" "M"

"0000010000" "Yes" "F"

"0000010000" "Yes" "F"

"0000010000" "Yes" "F"

"0000010001" "Yes" "M"

"0000010000" "Yes" "M"

"0000010000" "Yes" "F"

"0000010000" "Yes" "F"

"0000010000" "Yes" "F"

"0000010000" "Yes" "F"

"0000010000" "Yes" "F"

"0000010000" "Yes" "F"

"0000010000" "Yes" "M"

"0000010000" "Yes" "M"

"0000010000" "Yes" "M"

"0000011000" "Yes" "M"

"0000010001" "Yes" "M"

"0000010000" "Yes" "M"

"0000010000" "Yes" "F"

"0000010000" "Yes" "M"

"0000010000" "Yes" "M"

"0000010000" "Yes" "M"

"0000010000" "Yes" "M"

"0000001000" "Yes" "M"

"0000001000" "Yes" "M"

"0000001000" "Yes" "M"

"0000001000" "Yes" "M"

"0000001000" "Yes" "M"

"0000001000" "Yes" "M"

"0000001000" "Yes" "M"

"0000001000" "Yes" "M"

"0000001000" "Yes" "M"

"0000001010" "Yes" "M"

"0000001000" "Yes" "M"

"0000001000" "Yes" "M"

"0000001000" "Yes" "M"

"0000001000" "Yes" "M"

"0000001000" "Yes" "M"

"0000001000" "Yes" "F"

"0000001000" "Yes" "F"

"0000001000" "Yes" "F"

"0000001000" "Yes" "F"

"0000001000" "Yes" "F"

"0000001000" "Yes" "F"

"0000001000" "Yes" "F"

"0000001000" "Yes" "F"

"0000001000" "Yes" "F"

"0000001000" "Yes" "F"

"0100000000" "Yes" "F"

"0100000000" "Yes" "F"

"0100000000" "Yes" "F"

"0100000000" "Yes" "F"

"0100000000" "Yes" "F"

"0100000000" "Yes" "F"

"0100000000" "Yes" "F"

"0100000000" "Yes" "F"

"0100000000" "Yes" "F"

"0100000000" "Yes" "F"

"0100000000" "Yes" "F"

"0100000000" "Yes" "F"

"0100000000" "Yes" "F"

"0100000000" "Yes" "F"

"0100000000" "Yes" "F"

"0100000000" "Yes" "F"

"0100000000" "Yes" "F"

"0100000000" "Yes" "F"

"0100000000" "Yes" "F"

"0100000000" "Yes" "F"

"0100000000" "Yes" "F"

"0100000000" "Yes" "F"

"0100000000" "Yes" "F"

"0100000000" "Yes" "F"

"0100000000" "Yes" "F"

"0100000000" "Yes" "F"

"0100000000" "Yes" "F"

"0100000000" "Yes" "F"

"0100000000" "Yes" "F"

"0100000000" "Yes" "F"

"0100000000" "Yes" "F"

"0100000000" "Yes" "F"

"0100000000" "Yes" "F"

"0100000000" "Yes" "F"

"0100000000" "Yes" "F"

"0100000000" "Yes" "F"

"0100000000" "Yes" "F"

"0100000000" "Yes" "F"

"0100000000" "Yes" "F"

"0100000000" "Yes" "F"

"0100000000" "Yes" "F"

"0100000000" "Yes" "F"

"0100000000" "Yes" "F"

"0100000000" "Yes" "F"

"0100000000" "Yes" "F"

"0100000000" "Yes" "F"

"0100000000" "Yes" "F"

"0100000000" "Yes" "F"

"0100000000" "Yes" "F"

"0100000000" "Yes" "F"

"0000010000" "Yes" "F"

"0000010000" "Yes" "F"

"0000010000" "Yes" "M"

"0000010000" "Yes" "F"

"0000010000" "Yes" "M"

"0000010000" "Yes" "M"

"0000010000" "Yes" "M"

"0000010000" "Yes" "M"

"0000010000" "Yes" "M"

"0000010000" "Yes" "M"

"0000010000" "Yes" "M"

"0000010000" "Yes" "M"

"0000010000" "Yes" "M"

"0000010000" "Yes" "F"

"0000010000" "Yes" "F"

"0000010000" "Yes" "F"

"0000010000" "Yes" "F"

"0000010000" "Yes" "M"

"0000010000" "Yes" "F"

"0000010000" "Yes" "F"

"0000010000" "Yes" "F"

"0000010000" "Yes" "F"

"0000010000" "Yes" "F"

"0000010000" "Yes" "F"

"0000010000" "Yes" "F"

"0000010000" "Yes" "M"

"0000010000" "Yes" "M"

"0000010000" "Yes" "F"

"0000010000" "Yes" "M"

"0000010010" "Yes" "M"

"0000010000" "Yes" "M"

"0000010000" "Yes" "M"

"0000010000" "Yes" "M"

"0000010000" "Yes" "M"

"0000010000" "Yes" "M"

"0000010000" "Yes" "M"

"0000010000" "Yes" "M"

"0000010000" "Yes" "M"

"0000010000" "Yes" "M"

"0000010000" "Yes" "M"

"0000010000" "Yes" "M"

"0000010000" "Yes" "M"

"0000010000" "Yes" "M"

"0000010000" "Yes" "M"

"0000010000" "Yes" "M"

"0000010000" "Yes" "M"

"0000010000" "Yes" "M"

"0000010000" "Yes" "M"

"0000010000" "Yes" "M"

"0000011000" "Yes" "M"

"0000010000" "Yes" "M"

"0000010000" "Yes" "M"

"0000010000" "Yes" "M"

"0000010000" "Yes" "M"

"0000010000" "Yes" "M"

"0000010000" "Yes" "M"

"0000010000" "Yes" "M"

"0000010000" "Yes" "M"

"0000010000" "Yes" "M"

"0000010000" "Yes" "M"

"0000010000" "Yes" "M"

"0000010000" "Yes" "M"

"0000010000" "Yes" "M"

"0000010000" "Yes" "M"

"0000010000" "Yes" "M"

"0000010000" "Yes" "M"

"0000010000" "Yes" "M"

"0000010000" "Yes" "M"

"0000010000" "Yes" "M"

"0000010000" "Yes" "M"

"0000010000" "Yes" "M"

"0000010000" "Yes" "M"

"0000010000" "Yes" "M"

"0000010000" "Yes" "M"

"0000010000" "Yes" "M"

"0000010000" "Yes" "M"

"0000010000" "Yes" "M"

"0000010000" "Yes" "M"

"0000010000" "Yes" "M"

"0000010000" "Yes" "M"

"0000010000" "Yes" "M"

"0000010000" "Yes" "M"

"0000010000" "Yes" "M"

"0000010000" "Yes" "M"

"0000010000" "Yes" "M"

"0000010000" "Yes" "M"

"0000010000" "Yes" "M"

"0000010000" "Yes" "M"

"0000010000" "Yes" "M"

"0000010000" "Yes" "M"

"0000010000" "Yes" "M"

"0000010000" "Yes" "M"

"0000010000" "Yes" "M"

"0000010000" "Yes" "M"

"0000010000" "Yes" "M"

"0000010000" "Yes" "M"

"0000010000" "Yes" "M"

"0000010000" "Yes" "M"

"0000010000" "Yes" "M"

"0000010000" "Yes" "M"

"0000010000" "Yes" "M"

"0000010000" "Yes" "M"

"0000010000" "Yes" "M"

"0000010000" "Yes" "M"

"0000010000" "Yes" "M"

"0000010000" "Yes" "M"

"0000010000" "Yes" "M"

"0000010000" "Yes" "M"

"0000010000" "Yes" "M"

"0000010000" "Yes" "M"

"0000010000" "Yes" "M"

"0000010000" "Yes" "M"

"0000010000" "Yes" "M"

"0000011000" "Yes" "M"

"0000010000" "Yes" "M"

"0000010000" "Yes" "M"

"0000010000" "Yes" "M"

"0000010000" "Yes" "M"

"0000010000" "Yes" "M"

"0000010000" "Yes" "M"

"0000010000" "Yes" "M"

"0000010000" "Yes" "M"

"0000010010" "Yes" "M"

"0000010000" "Yes" "M"

"0000011000" "Yes" "M"

"0000001000" "Yes" "M"

"0000001000" "Yes" "M"

"0000001000" "Yes" "M"

"0000001000" "Yes" "M"

"0000001000" "Yes" "M"

"0000001000" "Yes" "M"

"0000001000" "Yes" "M"

"0000001000" "Yes" "M"

"0000001000" "Yes" "M"

"0000001000" "Yes" "M"

"0000001000" "Yes" "M"

"0000001000" "Yes" "M"

"0000001000" "Yes" "M"

"0000001000" "Yes" "M"

"0000001000" "Yes" "M"

"0000001100" "Yes" "M"

"0000001000" "Yes" "M"

"0000001000" "Yes" "M"

"0000001000" "Yes" "M"

"0000001000" "Yes" "M"

"0000001000" "Yes" "M"

"0000001000" "Yes" "M"

"0000001000" "Yes" "M"

"0000001000" "Yes" "M"

"0000001000" "Yes" "M"

"0000100000" "Yes" "M"

"0000100000" "Yes" "M"

"0000100000" "Yes" "M"

"0000100000" "Yes" "M"

"0000110000" "Yes" "M"

"0000100000" "Yes" "M"

"0000100000" "Yes" "M"

"0000100000" "Yes" "M"

"0000100000" "Yes" "F"

"0000100000" "Yes" "M"

"0000100000" "Yes" "M"

"0000100000" "Yes" "M"

"0000100000" "Yes" "M"

"0000100000" "Yes" "M"

"0000100000" "Yes" "F"

"0000100000" "Yes" "M"

"0000100000" "Yes" "F"

"0000100000" "Yes" "M"

"0000100000" "Yes" "M"

"0000100000" "Yes" "M"

"0000100000" "Yes" "F"

"0000100000" "Yes" "F"

"0000100000" "Yes" "M"

"0000100000" "Yes" "M"

"0000100000" "Yes" "F"

"1000000000" "Yes" "F"

"1000000000" "Yes" "F"

"1000000000" "Yes" "F"

"1000000000" "Yes" "F"

"1000000000" "Yes" "F"

"1000000000" "Yes" "F"

"1000000000" "Yes" "F"

"1000100000" "Yes" "F"

"1000000000" "Yes" "F"

"1000000000" "Yes" "F"

"1000000000" "Yes" "F"

"1000000000" "Yes" "F"

"1000000000" "Yes" "F"

"1000000000" "Yes" "F"

"1000000000" "Yes" "F"

"1001000000" "Yes" "F"

"1000000000" "Yes" "F"

"1000000000" "Yes" "F"

"1000000000" "Yes" "F"

"1000000000" "Yes" "F"

"1000000000" "Yes" "F"

"1000000000" "Yes" "F"

"1000000000" "Yes" "F"

"1000000000" "Yes" "F"

"1000000000" "Yes" "F"

"0000101000" "Yes" "M"

"0000100000" "Yes" "M"

"0000100000" "Yes" "M"

"0000100000" "Yes" "M"

"0000100000" "Yes" "M"

"0000100000" "Yes" "M"

"0000100000" "Yes" "M"

"0000100000" "Yes" "M"

"0000100000" "Yes" "M"

"0000100000" "Yes" "M"

"0000100000" "Yes" "M"

"0000100000" "Yes" "M"

"0000100000" "Yes" "M"

"0000010000" "Yes" "M"

"0000100000" "Yes" "M"

"0000100000" "Yes" "M"

"0000100000" "Yes" "M"

"0000100000" "Yes" "M"

"0000100000" "Yes" "M"

"0000100000" "Yes" "M"

"0000100000" "Yes" "M"

"0000100000" "Yes" "M"

"0000100000" "Yes" "M"

"0000100000" "Yes" "M"

"0000100000" "Yes" "M"

"0000010000" "Yes" "M"

"0000010010" "Yes" "M"

"0000010000" "Yes" "M"

"0000010000" "Yes" "M"

"0000010000" "Yes" "M"

"0000010000" "Yes" "M"

"0000010000" "Yes" "M"

"0000010000" "Yes" "M"

"0000010000" "Yes" "M"

"0000010010" "Yes" "M"

"0000010000" "Yes" "M"

"0000010000" "Yes" "M"

"0000010000" "Yes" "M"

"0000010000" "Yes" "M"

"0000010000" "Yes" "M"

"0000010000" "Yes" "M"

"0000010000" "Yes" "M"

"0000010000" "Yes" "M"

"0000010000" "Yes" "M"

"0000010000" "Yes" "M"

"0000010000" "Yes" "M"

"0000010000" "Yes" "M"

"0000010000" "Yes" "M"

"0000010000" "Yes" "M"

"0000010000" "Yes" "M"

"0000010000" "Yes" "M"

"0000010000" "Yes" "M"

"0000010000" "Yes" "M"

"0000010000" "Yes" "M"

"0000010000" "Yes" "M"

"0000010000" "Yes" "M"

"0000010000" "Yes" "M"

"0000010000" "Yes" "M"

"0000010000" "Yes" "M"

"0000010000" "Yes" "M"

"0000010000" "Yes" "M"

"0000010000" "Yes" "M"

"0000010000" "Yes" "M"

"0000010000" "Yes" "M"

"0000010000" "Yes" "M"

"0000010000" "Yes" "M"

"0000010000" "Yes" "M"

"0000010000" "Yes" "M"

"0000010000" "Yes" "M"

"0000010000" "Yes" "M"

"0000010000" "Yes" "M"

"0000010000" "Yes" "M"

"0000010000" "Yes" "M"

"0000011000" "Yes" "M"

"0000010000" "Yes" "M"

"0000010000" "Yes" "M"

"0000010000" "Yes" "M"

"0000010000" "Yes" "M"

"0000010000" "Yes" "M"

"0000010000" "Yes" "M"

"0000010000" "Yes" "M"

"0000010000" "Yes" "M"

"0000010000" "Yes" "M"

"0000010000" "Yes" "M"

"0000010000" "Yes" "M"

"0000010000" "Yes" "M"

"0000010000" "Yes" "M"

"0000010000" "Yes" "M"

"0000010000" "Yes" "M"

"0000010000" "Yes" "M"

"0000010000" "Yes" "M"

"0000010000" "Yes" "M"

"0000010000" "Yes" "M"

"0000010000" "Yes" "M"

"0000010000" "Yes" "M"

"0000010100" "Yes" "M"

"0000010000" "Yes" "M"

"0000010000" "Yes" "M"

"0000010000" "Yes" "F"

"0000010000" "Yes" "F"

"0000010000" "Yes" "F"

"0000010000" "Yes" "F"

"0000010000" "Yes" "F"

"0000010000" "Yes" "F"

"0000010000" "Yes" "M"

"0000010000" "Yes" "M"

"0000010000" "Yes" "M"

"0000010000" "Yes" "F"

"0000010000" "Yes" "M"

"0000010000" "Yes" "F"

"0000010000" "Yes" "M"

"0000010000" "Yes" "F"

"0000010000" "Yes" "F"

"0000010000" "Yes" "M"

"0000010000" "Yes" "F"

"0000010000" "Yes" "F"

"0000010000" "Yes" "F"

"0000010000" "Yes" "F"

"0000010000" "Yes" "F"

"0000010000" "Yes" "F"

"0000010000" "Yes" "M"

"0000001000" "Yes" "F"

"0000001000" "Yes" "F"

"0000001000" "Yes" "F"

"0000010000" "Yes" "M"

"0000001000" "Yes" "F"

"0000001000" "Yes" "F"

"0000001000" "Yes" "F"

"0000010000" "Yes" "M"

"0000010000" "Yes" "M"

"0000001000" "Yes" "F"

"0000010000" "Yes" "M"

"0000001000" "Yes" "F"

"0000001000" "Yes" "F"

"0000001000" "Yes" "F"

"0000001000" "Yes" "F"

"0000001000" "Yes" "F"

"0000001000" "Yes" "F"

"0000001000" "Yes" "F"

"0000001000" "Yes" "F"

"0000001000" "Yes" "F"

"0000001000" "Yes" "F"

"0000001000" "Yes" "F"

"0000001000" "Yes" "F"

"0000001000" "Yes" "M"

"0000001000" "Yes" "M"

"1000000000" "No" "F"

"1000000000" "No" "M"

"1000000000" "No" "M"

"1000000000" "No" "F"

"1000000000" "No" "M"

"1000000000" "No" "F"

"1000000000" "No" "M"

"1000000000" "No" "M"

"1000000000" "No" "M"

"1000000000" "No" "M"

"1000000000" "No" "F"

"1000000000" "No" "M"

"1000000000" "No" "M"

"1100000000" "No" "M"

"1000000000" "No" "M"

"1000000000" "No" "M"

"1000000000" "No" "F"

"1000000000" "No" "M"

"1000000000" "No" "M"

"1000000000" "No" "M"

"1000000000" "No" "M"

"1000000000" "No" "M"

"1000000000" "No" "M"

"1000000000" "No" "M"

"1000000000" "No" "M"

"1000000000" "No" "M"

"1000000000" "No" "F"

"1000000000" "No" "M"

"1000000000" "No" "M"

"1000000000" "No" "M"

"1000000000" "No" "M"

"1000000000" "No" "M"

"1000000000" "No" "M"

"1000000000" "No" "F"

"1000000000" "No" "M"

"1000000000" "No" "M"

"1000000000" "No" "M"

"1000000000" "No" "F"

"1000000000" "No" "F"

"1000100000" "No" "M"

"1000000000" "No" "F"

"1000000000" "No" "M"

"1000000000" "No" "M"

"1000000000" "No" "F"

"1000000000" "No" "F"

"1000000000" "No" "F"

"1000000000" "No" "M"

"1000000000" "No" "M"

"1000000000" "No" "M"

"1000000000" "No" "M"

"1000000000" "No" "F"

"1000000000" "No" "F"

"1000000000" "No" "F"

"1000000001" "No" "F"

"1000000000" "No" "F"

"1000000000" "No" "F"

"1000000000" "No" "F"

"1000000000" "No" "F"

"1000000000" "No" "F"

"1000000000" "No" "F"

"1000010000" "No" "F"

"1000000000" "No" "F"

"1000000000" "No" "F"

"1000000000" "No" "F"

"1000000000" "No" "F"

"1100000000" "No" "F"

"1000000000" "No" "F"

"1000000000" "No" "F"

"1000000000" "No" "F"

"1000000000" "No" "F"

"1000000000" "No" "F"

"1000000000" "No" "F"

"1000000000" "No" "F"

"1000000000" "No" "F"

"1000000000" "No" "F"

"1000000000" "No" "M"

"1000000000" "No" "M"

"1000000000" "No" "M"

"1000000000" "No" "M"

"1000000000" "No" "F"

"1000000000" "No" "M"

"1000000000" "No" "F"

"1000000000" "No" "F"

"1000010010" "No" "F"

"1000000000" "No" "F"

"1000000000" "No" "M"

"1000000000" "No" "F"

"1000000000" "No" "F"

"1000000000" "No" "F"

"1000000000" "No" "M"

"1100000000" "No" "F"

"1000000000" "No" "F"

"1000000000" "No" "F"

"1000000000" "No" "F"

"1000000000" "No" "M"

"1000000000" "No" "M"

"1000000000" "No" "F"

"1000000000" "No" "M"

"1000000000" "No" "F"

"1000000000" "No" "F"

"1000010000" "No" "M"

"1000001000" "No" "M"

"1000000000" "No" "M"

"1000000000" "No" "M"

"1000000000" "No" "M"

"1000011000" "No" "M"

"1000000000" "No" "F"

"1000100000" "No" "M"

"1000000000" "No" "F"

"1000000000" "No" "M"

"1000000000" "No" "M"

"1000000000" "No" "M"

"1000000000" "No" "M"

"1000000000" "No" "M"

"1000000000" "No" "M"

"1000000000" "No" "M"

"1000000000" "No" "F"

"1000000000" "No" "M"

"1000000000" "No" "M"

"1000000000" "No" "M"

"1000000000" "No" "M"

"1000000000" "No" "F"

"1000000000" "No" "M"

"1000000000" "No" "F"

"1000000000" "No" "F"

"0100000000" "No" "M"

"0100000000" "No" "M"

"0100000000" "No" "M"

"0100000000" "No" "M"

"0101000000" "No" "M"

"1000000000" "No" "F"

"0100000000" "No" "M"

"0100000010" "No" "M"

"0100000000" "No" "M"

"0100000000" "No" "M"

"0100000000" "No" "M"

"0100000000" "No" "M"

"0100000000" "No" "M"

"0100000000" "No" "M"

"0100000000" "No" "M"

"0100000000" "No" "M"

"0100000000" "No" "M"

"0100000000" "No" "M"

"0100000000" "No" "M"

"0100000100" "No" "M"

"1000000000" "No" "F"

"1000000000" "No" "F"

"1010000000" "No" "F"

"1000000000" "No" "F"

"1000000000" "No" "F"

"1000000000" "No" "M"

"1001000000" "No" "M"

"1000000000" "No" "M"

"1000000000" "No" "M"

"1000000000" "No" "M"

"1000000000" "No" "F"

"1000000000" "No" "M"

"1000000000" "No" "M"

"1000000000" "No" "M"

"1000000000" "No" "M"

"1000000000" "No" "M"

"1000000000" "No" "M"

"1000000000" "No" "F"

"1000000000" "No" "F"

"1000000000" "No" "M"

"1000000000" "No" "M"

"1000001000" "No" "M"

"1000000000" "No" "M"

"1000000000" "No" "M"

"1000000000" "No" "M"

"1000000000" "No" "M"

"1000000000" "No" "M"

"1000000000" "No" "M"

"1000000000" "No" "F"

"1000000000" "No" "M"

"1000000000" "No" "F"

"1000000000" "No" "F"

"1000000000" "No" "F"

"1000000000" "No" "M"

"1000000000" "No" "F"

"1000000000" "No" "M"

"1000000000" "No" "M"

"1000000000" "No" "F"

"1000000000" "No" "F"

"1000000000" "No" "M"

"1000000000" "No" "F"

"1000000000" "No" "F"

"1000000000" "No" "F"

"1000000000" "No" "F"

"1000000000" "No" "F"

"1000000000" "No" "F"

"1000000000" "No" "M"

"1000000000" "No" "F"

"1000000000" "No" "F"

"1000000000" "No" "F"

"1000000000" "No" "F"

"1000000000" "No" "F"

"1000000000" "No" "M"

"1000000000" "No" "F"

"1000000000" "No" "F"

"0100000000" "No" "M"

"0100000000" "No" "M"

"0100100000" "No" "M"

"0100000000" "No" "M"

"0100000000" "No" "M"

"0100000000" "No" "M"

"0100000000" "No" "U"

"0100000000" "No" "M"

"0100010000" "No" "M"

"0110000000" "No" "M"

"0100000000" "No" "M"

"0100000000" "No" "F"

"0100000000" "No" "M"

"0100000000" "No" "M"

"0100000000" "No" "M"

"0100000000" "No" "M"

"0100100000" "No" "M"

"0100000000" "No" "M"

"0100000000" "No" "M"

"0100000000" "No" "M"

"0100000010" "No" "M"

"0100000000" "No" "M"

"0100000000" "No" "M"

"0100000000" "No" "M"

"0100000000" "No" "M"

"0100100000" "No" "M"

"0100000000" "No" "M"

"0100000000" "No" "M"

"0100000000" "No" "F"

"0100000100" "No" "F"

"0100000000" "No" "F"

"0100000000" "No" "F"

"0100000000" "No" "F"

"0100000000" "No" "F"

"0100000000" "No" "F"

"0100000000" "No" "F"

"0100000000" "No" "F"

"0100000000" "No" "F"

"0100000000" "No" "F"

"0100000000" "No" "F"

"0100000000" "No" "F"

"0100000000" "No" "F"

"0100000000" "No" "F"

"0100000000" "No" "F"

"0100000000" "No" "F"

"0100000000" "No" "F"

"0100000000" "No" "F"

"0100000000" "No" "F"

"0100000000" "No" "F"

"0100000000" "No" "F"

"0100000000" "No" "F"

"0100000010" "No" "F"

"0100000000" "No" "F"

"0100000000" "No" "F"

"0100000000" "No" "F"

"0100000000" "No" "F"

"0100000000" "No" "F"

"0100000000" "No" "M"

"0100000000" "No" "F"

"0100000000" "No" "F"

"0100011000" "No" "F"

"0100000000" "No" "M"

"0100000000" "No" "F"

"0100000000" "No" "M"

"0100000000" "No" "F"

"0100000000" "No" "F"

"0100000000" "No" "M"

"0100000000" "No" "F"

"0100000000" "No" "M"

"0100000000" "No" "M"

"0100000000" "No" "F"

"0100000000" "No" "M"

"0100000000" "No" "F"

"0100000000" "No" "F"

"0100000000" "No" "M"

"0100000000" "No" "F"

"0100101000" "No" "F"

"0100000000" "No" "F"

"0100000000" "No" "F"

"0100000000" "No" "M"

"0100000000" "No" "M"

"0100000000" "No" "M"

"0100000000" "No" "F"

"0100000000" "No" "M"

"0100000000" "No" "M"

"0100000000" "No" "F"

"0100000000" "No" "M"

"0100000000" "No" "M"

"0100000000" "No" "M"

"0100000000" "No" "F"

"0100000000" "No" "F"

"0100000000" "No" "M"

"0100000000" "No" "M"

"0100000000" "No" "M"

"0100010000" "No" "M"

"0100000000" "No" "F"

"0100000000" "No" "F"

"0100000000" "No" "M"

"0100000000" "No" "F"

"0100000000" "No" "M"

"0100000000" "No" "F"

"0100000000" "No" "F"

"0100000000" "No" "M"

"0100000000" "No" "M"

"0100000000" "No" "M"

"0100000000" "No" "M"

"0100000000" "No" "M"

"0100000000" "No" "M"

"0100000000" "No" "M"

"0100000000" "No" "M"

"0100000000" "No" "F"

"0100000000" "No" "M"

"0100000000" "No" "F"

"0100000000" "No" "M"

"0100000000" "No" "F"

"0100000000" "No" "M"

"0100000000" "No" "F"

"0100000000" "No" "M"

"0100000000" "No" "M"

"0100000000" "No" "F"

"0100000000" "No" "F"

"0100000000" "No" "M"

"0100000000" "No" "M"

"0100000000" "No" "M"

"0100000000" "No" "M"

"0100000000" "No" "M"

"0100000000" "No" "M"

"0100000000" "No" "M"

"0100000000" "No" "F"

"0100000000" "No" "M"

"0100000000" "No" "F"

"0100000000" "No" "M"

"0100000000" "No" "M"

"0100000000" "No" "M"

"0100000000" "No" "M"

"0100000000" "No" "F"

"0101000000" "No" "M"

"0100000000" "No" "M"

"0100000000" "No" "M"

"0100000000" "No" "M"

"0100000000" "No" "M"

"0100000000" "No" "M"

"0100000000" "No" "M"

"0100000000" "No" "F"

"0100000000" "No" "M"

"0100000000" "No" "F"

"0100000000" "No" "M"

"0110000000" "No" "M"

"0100000000" "No" "F"

"0100000000" "No" "M"

"0100000000" "No" "F"

"0100000000" "No" "F"

"0100000000" "No" "M"

"0100000000" "No" "M"

"0100000000" "No" "M"

"0100000000" "No" "M"

"0100000000" "No" "M"

"0100000000" "No" "F"

"0100000000" "No" "M"

"0100000000" "No" "M"

"0100000000" "No" "M"

"0100000000" "No" "F"

"0100010000" "No" "M"

"0100000000" "No" "M"

"0100000000" "No" "M"

"0100010000" "No" "M"

"0110000000" "No" "M"

"0100000000" "No" "M"

"0100000000" "No" "M"

"0100000000" "No" "F"

"0100010000" "No" "M"

"0100000000" "No" "M"

"0100000000" "No" "F"

"0110000000" "No" "M"

"0100000000" "No" "M"

"0100000000" "No" "M"

"0100000000" "No" "M"

"0100000000" "No" "F"

"0100000000" "No" "F"

"0100000000" "No" "M"

"0100000000" "No" "F"

"0100000000" "No" "F"

"0100000000" "No" "F"

"0100000000" "No" "F"

"0100000000" "No" "F"

"0100000000" "No" "F"

"0100000000" "No" "M"

"0100000000" "No" "M"

"0100000000" "No" "M"

"0100000000" "No" "M"

"0100000000" "No" "M"

"0100000000" "No" "F"

"0100000000" "No" "F"

"0100000000" "No" "M"

"0100000000" "No" "F"

"0100000000" "No" "F"

"0100000000" "No" "M"

"0100000000" "No" "M"

"0100000000" "No" "F"

"0100000000" "No" "M"

"0100110000" "No" "M"

"0100000000" "No" "M"

"0100000000" "No" "M"

"0100000000" "No" "M"

"0100000000" "No" "M"

"0100000000" "No" "M"

"0100000000" "No" "M"

"0100000000" "No" "M"

"0100000000" "No" "M"

"0100000000" "No" "M"

"0100000000" "No" "M"

"0100000000" "No" "M"

"0100000000" "No" "M"

"0100000000" "No" "M"

"0100000000" "No" "M"

"0100000000" "No" "M"

"0100000000" "No" "M"

"0100000000" "No" "F"

"0100000000" "No" "M"

"0100000000" "No" "M"

"0100000000" "No" "F"

"0100000000" "No" "M"

"0100000000" "No" "M"

"0100000000" "No" "M"

"0100000000" "No" "M"

"0100000000" "No" "F"

"0100000000" "No" "F"

"0100000000" "No" "F"

"0100000000" "No" "F"

"0100000000" "No" "F"

"0100000000" "No" "F"

"0100000000" "No" "F"

"0100000000" "No" "F"

"0100000000" "No" "F"

"0100000000" "No" "F"

"0100000000" "No" "F"

"0100000000" "No" "F"

"0100000000" "No" "F"

"0100000000" "No" "F"

"0110000000" "No" "F"

"0100000000" "No" "F"

"0100000000" "No" "F"

"0100000000" "No" "F"

"0100000000" "No" "F"

"0100000000" "No" "F"

"0100000000" "No" "F"

"0100000000" "No" "F"

"0100000000" "No" "F"

"0100000000" "No" "F"

"0100000000" "No" "F"

"0100000000" "No" "M"

"0110000000" "No" "M"

"0100000000" "No" "M"

"0100000000" "No" "M"

"0100000000" "No" "F"

"0100000000" "No" "M"

"0100000000" "No" "M"

"0100000000" "No" "M"

"0100000000" "No" "M"

"0100000000" "No" "M"

"0100000000" "No" "M"

"0100000000" "No" "F"

"0100000000" "No" "M"

"0100000000" "No" "M"

"0100000000" "No" "M"

"0101000000" "No" "M"

"0110000000" "No" "M"

"0100000000" "No" "M"

"0100000000" "No" "M"

"0100000000" "No" "F"

"0100000000" "No" "M"

"0101100000" "No" "M"

"0101000000" "No" "M"

"0100000000" "No" "M"

"0100000000" "No" "F"

"0100000000" "No" "M"

"0100000000" "No" "M"

"0100000000" "No" "M"

"0100000000" "No" "M"

"0100000000" "No" "M"

"0100001000" "No" "M"

"0100000000" "No" "M"

"0100100000" "No" "M"

"0100001000" "No" "M"

"0100000000" "No" "M"

"0100000000" "No" "M"

"0100000000" "No" "M"

"0100000000" "No" "M"

"0100000000" "No" "F"

"0100000000" "No" "F"

"0100000000" "No" "M"

"0100000000" "No" "M"

"0100000000" "No" "M"

"0100000000" "No" "M"

"0100000000" "No" "M"

"0100000000" "No" "M"

"0100000000" "No" "M"

"0100000000" "No" "M"

"0100000000" "No" "F"

"0100000000" "No" "M"

"0100000000" "No" "F"

"0100000000" "No" "F"

"0100000000" "No" "F"

"0100000000" "No" "F"

"0100000000" "No" "F"

"0100000000" "No" "F"

"0100000000" "No" "F"

"0100000000" "No" "F"

"0100000000" "No" "M"

"0100000000" "No" "M"

"0100000000" "No" "F"

"0100000000" "No" "M"

"0100000000" "No" "F"

"0100000000" "No" "M"

"0100000000" "No" "M"

"0100000000" "No" "F"

"0100000000" "No" "F"

"0100000000" "No" "F"

"0100000000" "No" "M"

"0100000000" "No" "M"

"0110000000" "No" "F"

"0100000000" "No" "M"

"0100000000" "No" "F"

"0100000000" "No" "M"

"0100000000" "No" "F"

"0110000000" "No" "M"

"0100000000" "No" "M"

"0100000000" "No" "F"

"0100000000" "No" "M"

"0100000000" "No" "M"

"0100000000" "No" "M"

"0110000000" "No" "M"

"0100000000" "No" "M"

"0100000000" "No" "M"

"0100000000" "No" "M"

"0100000001" "No" "M"

"0100000000" "No" "M"

"0100000000" "No" "M"

"0100000000" "No" "M"

"0100000000" "No" "M"

"0100000000" "No" "M"

"0100110000" "No" "M"

"0100000000" "No" "M"

"0100000000" "No" "M"

"0100000000" "No" "M"

"0100000000" "No" "M"

"0100000000" "No" "M"

"0100000000" "No" "M"

"0100000000" "No" "M"

"0100010000" "No" "M"

"0100000000" "No" "M"

"0100000000" "No" "M"

"0100000000" "No" "M"

"0100000000" "No" "M"

"0100000000" "No" "M"

"0100000000" "No" "M"

"0100000000" "No" "M"

"0100000000" "No" "M"

"0100000000" "No" "M"

"0100000000" "No" "M"

"0100000000" "No" "M"

"0100000000" "No" "M"

"0100000000" "No" "M"

"0100000000" "No" "M"

"0100000000" "No" "M"

"0100000000" "No" "M"

"0101100000" "No" "M"

"0100000000" "No" "M"

"0100000000" "No" "F"

"0100000000" "No" "F"

"0100000000" "No" "F"

"0100000000" "No" "M"

"0100000000" "No" "F"

"0100000000" "No" "F"

"0100000000" "No" "F"

"0100000000" "No" "F"

"0100000000" "No" "F"

"0100000000" "No" "F"

"0100000000" "No" "F"

"0100000000" "No" "F"

"0100000000" "No" "M"

"0100000000" "No" "F"

"0110000000" "No" "F"

"0100000000" "No" "M"

"0101000000" "No" "F"

"0100000000" "No" "M"

"0100000000" "No" "F"

"0100000000" "No" "F"

"0100000000" "No" "F"

"0100000000" "No" "M"

"0100000000" "No" "F"

"0100000000" "No" "F"

"0100000000" "No" "F"

"0100000000" "No" "F"

"0100000000" "No" "M"

"0100000000" "No" "M"

"0100000000" "No" "M"

"0100000000" "No" "F"

"0100000000" "No" "M"

"0100000000" "No" "F"

"0100000000" "No" "M"

"0100000000" "No" "F"

"0100000000" "No" "M"

"0100000000" "No" "F"

"0100000000" "No" "F"

"0100000000" "No" "M"

"0100000000" "No" "M"

"0100000000" "No" "F"

"0100000000" "No" "M"

"0100000000" "No" "M"

"0100000000" "No" "M"

"0100000000" "No" "M"

"0100000000" "No" "M"

"0100000000" "No" "F"

"0100000000" "No" "M"

"0100000000" "No" "M"

"0100000000" "No" "F"

"0100000000" "No" "M"

"0100000000" "No" "F"

"0100000000" "No" "M"

"0100000000" "No" "M"

"0100000000" "No" "F"

"0100000000" "No" "F"

"0100000000" "No" "F"

"0100000000" "No" "F"

"0100000000" "No" "F"

"0100000000" "No" "M"

"0100000000" "No" "F"

"0100000000" "No" "M"

"0100000000" "No" "F"

"0100000000" "No" "F"

"0100000000" "No" "F"

"0100000000" "No" "F"

"0101100000" "No" "F"

"0111000000" "No" "M"

"0101000000" "No" "M"

"0100000000" "No" "F"

"0111000001" "No" "M"

"0100000000" "No" "F"

"0100000000" "No" "M"

"0100000000" "No" "M"

"0100000000" "No" "F"

"0100000000" "No" "F"

"0100000000" "No" "M"

"0100000000" "No" "M"

"0100000000" "No" "M"

"0100000000" "No" "F"

"0100000000" "No" "M"

"0100000000" "No" "M"

"0100000000" "No" "M"

"0100000000" "No" "M"

"0100000000" "No" "M"

"0100000000" "No" "M"

"0100000000" "No" "M"

"0100000000" "No" "M"

"0100000000" "No" "M"

"0100000000" "No" "M"

"0100000001" "No" "M"

"0100000000" "No" "F"

"0100000000" "No" "M"

"0100000000" "No" "M"

"0100000000" "No" "M"

"0100000000" "No" "M"

"0100010000" "No" "M"

"0100000000" "No" "M"

"0100000000" "No" "M"

"0100000000" "No" "M"

"0100010000" "No" "M"

"0100000000" "No" "F"

"0100000000" "No" "F"

"0100000000" "No" "F"

"0100000000" "No" "M"

"0100000000" "No" "M"

"0110000000" "No" "M"

"0100000000" "No" "F"

"0100000000" "No" "F"

"0100000000" "No" "M"

"0100000000" "No" "F"

"0100000000" "No" "M"

"0100000000" "No" "M"

"0100000000" "No" "F"

"0100000000" "No" "M"

"0100000000" "No" "F"

"0100000000" "No" "F"

"0111100000" "No" "M"

"0100000000" "No" "F"

"0100000000" "No" "M"

"0100000000" "No" "F"

"0100000000" "No" "F"

"0100000000" "No" "M"

"0100000000" "No" "F"

"0100000000" "No" "F"

"0100000000" "No" "M"

"0001000010" "No" "M"

"0001000000" "No" "F"

"0001000000" "No" "M"

"0001000000" "No" "M"

"0001000000" "No" "M"

"0001000000" "No" "M"

"0001000000" "No" "F"

"0001000000" "No" "F"

"0001000000" "No" "M"

"0001000000" "No" "M"

"0001001000" "No" "M"

"0001000000" "No" "F"

"0100000000" "No" "F"

"0100000000" "No" "F"

"0001000000" "No" "F"

"0100000000" "No" "F"

"0100000000" "No" "F"

"0100000000" "No" "F"

"0001000000" "No" "M"

"0001000000" "No" "M"

"0001000000" "No" "F"

"0001000000" "No" "F"

"0100000000" "No" "F"

"0001000000" "No" "F"

"0001001000" "No" "F"

"0001000000" "No" "F"

"0001000000" "No" "F"

"0001000000" "No" "F"

"0001000000" "No" "F"

"0001000000" "No" "F"

"0001000000" "No" "F"

"0001000000" "No" "F"

"0001000000" "No" "F"

"0001000000" "No" "F"

"0001000000" "No" "F"

"0001000000" "No" "F"

"0001000000" "No" "F"

"0001000000" "No" "M"

"0001000000" "No" "M"

"0001000000" "No" "M"

"0001000000" "No" "M"

"0001000000" "No" "M"

"0001000000" "No" "M"

"0001000000" "No" "M"

"0001000000" "No" "M"

"0001000000" "No" "M"

"0001000000" "No" "M"

"0001000000" "No" "M"

"0001000000" "No" "M"

"0001000000" "No" "M"

"0001000000" "No" "M"

"0001000000" "No" "M"

"0001000100" "No" "M"

"0001000000" "No" "M"

"0001000000" "No" "M"

"0001000000" "No" "M"

"0001000000" "No" "M"

"0001000000" "No" "M"

"0001000000" "No" "M"

"0001000000" "No" "M"

"0001000000" "No" "M"

"0001000000" "No" "M"

"0001000000" "No" "F"

"0001000000" "No" "M"

"0001000000" "No" "F"

"0001000000" "No" "M"

"0001000000" "No" "F"

"0001000000" "No" "F"

"0001000000" "No" "M"

"0001000000" "No" "M"

"0001000000" "No" "F"

"0001000000" "No" "M"

"0001000000" "No" "F"

"0001000000" "No" "F"

"0001000000" "No" "M"

"0001000000" "No" "F"

"1000000000" "Yes" "U"

"1000000000" "Yes" "U"

"1000000000" "Yes" "U"

"1000000000" "Yes" "U"

"1000000000" "Yes" "U"

"1000000000" "Yes" "U"

"1000000000" "Yes" "U"

"1000000000" "Yes" "U"

"1000000000" "Yes" "U"

"1000000000" "Yes" "U"

"1000000000" "Yes" "U"

"1000000000" "Yes" "U"

"1000000000" "Yes" "U"

"1000000000" "Yes" "U"

"1000000000" "Yes" "U"

"1000000000" "Yes" "U"

"1000000000" "Yes" "U"

"1000000000" "Yes" "U"

"1000000000" "Yes" "U"

"1000000000" "Yes" "U"

"1000000000" "Yes" "U"

"1000000000" "Yes" "U"

"1000000000" "Yes" "U"

"1000000000" "Yes" "U"

"1000000000" "Yes" "U"

"1000000000" "Yes" "U"

"1000000000" "Yes" "U"

"1000000000" "Yes" "U"

"1000000000" "Yes" "U"

"1000000000" "Yes" "U"

"1000000000" "Yes" "U"

"1000000000" "Yes" "U"

"1000000000" "Yes" "U"

"1000000000" "Yes" "U"

"1000000000" "Yes" "U"

"1000000000" "Yes" "U"

"1000000000" "Yes" "U"

"1000000000" "Yes" "U"

"1000000000" "Yes" "F"

"1000000000" "Yes" "M"

"1000000000" "Yes" "M"

"1000000000" "Yes" "M"

"1000000000" "Yes" "F"

"1000000000" "Yes" "M"

"1000000000" "Yes" "M"

"1000000000" "Yes" "M"

"1000000000" "Yes" "F"

"1000000000" "Yes" "F"

"1000000000" "Yes" "M"

"1000000000" "Yes" "M"

"1000000000" "Yes" "F"

"1000000000" "Yes" "F"

"1000000000" "Yes" "M"

"1000000000" "Yes" "F"

"1000000000" "Yes" "F"

"1000000000" "Yes" "F"

"1000000000" "Yes" "F"

"1000000000" "Yes" "M"

"1000000000" "Yes" "F"

"1000000000" "Yes" "M"

"1000000000" "Yes" "F"

"1000000000" "Yes" "F"

"1000000000" "Yes" "F"

"1000000000" "Yes" "M"

"1000000000" "Yes" "F"

"1000000000" "Yes" "F"

"1000000000" "Yes" "M"

"1010000000" "Yes" "F"

"1000000000" "Yes" "F"

"1000000000" "Yes" "M"

"1000000000" "Yes" "M"

"1000000000" "Yes" "F"

"1000000000" "Yes" "F"

"1000000000" "Yes" "F"

"1100000000" "Yes" "F"

"1000000000" "Yes" "M"

"1000000000" "Yes" "F"

"1000000000" "Yes" "F"

"1000000000" "Yes" "M"

"1000000000" "Yes" "M"

"1000000000" "Yes" "F"

"1000000000" "Yes" "M"

"1000000000" "Yes" "M"

"1000000000" "Yes" "M"

"1000000000" "Yes" "F"

"1000000000" "Yes" "M"

"1000000000" "Yes" "F"

"1000000000" "Yes" "F"

"1000000000" "Yes" "M"

"1000100000" "Yes" "M"

"1000000000" "Yes" "F"

"1100000000" "Yes" "F"

"1000000000" "Yes" "F"

"1000000000" "Yes" "F"

"1000000000" "Yes" "M"

"1000000000" "Yes" "F"

"1000000000" "Yes" "F"

"1000000000" "Yes" "F"

"1000000000" "Yes" "F"

"1000000000" "Yes" "F"

"1000000000" "Yes" "M"

"1000000000" "Yes" "F"

"1000000000" "Yes" "M"

"1000000000" "Yes" "M"

"1000000000" "Yes" "M"

"1000000000" "Yes" "M"

"1000000000" "Yes" "F"

"1000000000" "Yes" "F"

"1000000000" "Yes" "M"

"1000000000" "Yes" "M"

"1000000000" "Yes" "F"

"1000000000" "Yes" "F"

"1000000000" "Yes" "F"

"1000000000" "Yes" "F"

"1000000000" "Yes" "M"

"1000000000" "Yes" "F"

"1000000000" "Yes" "M"

"1000000000" "Yes" "M"

"1000000000" "Yes" "F"

"1000000000" "Yes" "F"

"1000000000" "Yes" "F"

"1000000000" "Yes" "F"

"1000000000" "Yes" "F"

"1000000000" "Yes" "F"

"1000000000" "Yes" "F"

"1000000000" "Yes" "M"

"1000000000" "Yes" "F"

"1000000000" "Yes" "M"

"1100000000" "Yes" "M"

"1000000000" "Yes" "M"

"1000000000" "Yes" "F"

"1000000000" "Yes" "M"

"1000000000" "Yes" "F"

"1000000000" "Yes" "M"

"1000000000" "Yes" "M"

"1000000000" "Yes" "F"

"1000000000" "Yes" "M"

"1000000000" "Yes" "M"

"1000000000" "Yes" "M"

"1000000000" "Yes" "M"

"1000000000" "Yes" "M"

"1000000000" "Yes" "M"

"1000000000" "Yes" "M"

"1000000000" "Yes" "M"

"1000000000" "Yes" "F"

"1000000000" "Yes" "F"

"1000000000" "Yes" "M"

"1000000000" "Yes" "M"

"1000000000" "Yes" "M"

"1000000000" "Yes" "M"

"1000000000" "Yes" "M"

"1000000000" "Yes" "M"

"1000000000" "Yes" "M"

"1000000000" "Yes" "F"

"1000000000" "Yes" "M"

"1000000000" "Yes" "M"

"1000000000" "Yes" "M"

"1000000000" "Yes" "F"

"1000000000" "Yes" "M"

"1000000000" "Yes" "M"

"1010000000" "Yes" "M"

"1000000000" "Yes" "F"

"1000000000" "Yes" "F"

"1000000000" "Yes" "F"

"1000000000" "Yes" "F"

"1000000000" "Yes" "M"

"1000000000" "Yes" "F"

"1010000000" "Yes" "F"

"1000000000" "Yes" "F"

"1000000000" "Yes" "F"

"1000000000" "Yes" "F"

"1000000000" "Yes" "F"

"1010000000" "Yes" "F"

"1000000000" "Yes" "F"

"1000000000" "Yes" "F"

"1100000000" "Yes" "M"

"1000000001" "Yes" "F"

"1000000000" "Yes" "F"

"1000000000" "Yes" "M"

"1010000000" "Yes" "F"

"1000000000" "Yes" "F"

"1100000000" "Yes" "F"

"1100000000" "Yes" "F"

"1000000000" "Yes" "F"

"1000000000" "Yes" "F"

"1000000000" "Yes" "F"

"1000000000" "Yes" "F"

"1000000000" "Yes" "F"

"1010000000" "Yes" "M"

"1010000000" "Yes" "F"

"1010000000" "Yes" "F"

"1010000000" "Yes" "F"

"1010000000" "Yes" "M"

"1000000000" "Yes" "F"

"1010000000" "Yes" "F"

"1100000000" "Yes" "M"

"1010000000" "Yes" "F"

"1010000000" "Yes" "F"

"1010000000" "Yes" "F"

"1000000000" "Yes" "F"

"1010000000" "Yes" "F"

"1010000000" "Yes" "F"

"1000000000" "Yes" "F"

"1000000000" "Yes" "F"

"1010000000" "Yes" "F"

"1100000000" "Yes" "F"

"1000000000" "Yes" "M"

"1100000000" "Yes" "F"

"1000000000" "Yes" "F"

"1000000000" "Yes" "F"

"1000000000" "Yes" "F"

"1100000000" "Yes" "F"

"1000000000" "Yes" "M"

"1000000000" "Yes" "M"

"1100000000" "Yes" "M"

"1000000000" "Yes" "F"

"1000000000" "Yes" "F"

"1000000000" "Yes" "F"

"1000000000" "Yes" "M"

"1000000000" "Yes" "F"

"1000000000" "Yes" "M"

"1010000000" "Yes" "M"

"1000000000" "Yes" "F"

"1100000000" "Yes" "F"

"1010000000" "Yes" "F"

"1000000000" "Yes" "M"

"1000100000" "Yes" "F"

"1000000000" "Yes" "F"

"1000000000" "Yes" "M"

"1000000000" "Yes" "F"

"1000000000" "Yes" "M"

"1000000000" "Yes" "F"

"1000000000" "Yes" "F"

"1000000000" "Yes" "F"

"1000000000" "Yes" "F"

"1000000000" "Yes" "F"

"1000000000" "Yes" "M"

"1000000000" "Yes" "F"

"1000000000" "Yes" "F"

"1000000000" "Yes" "M"

"1000000000" "Yes" "F"

"1000000000" "Yes" "F"

"1000000000" "Yes" "F"

"1000000000" "Yes" "F"

"1000000000" "Yes" "F"

"1000000000" "Yes" "M"

"1000000000" "Yes" "F"

"1000000000" "Yes" "F"

"1000000000" "Yes" "F"

"1000000000" "Yes" "F"

"1010000000" "Yes" "M"

"1000000000" "Yes" "M"

"1000010000" "Yes" "M"

"1001000000" "Yes" "M"

"1000000000" "Yes" "M"

"1000000000" "Yes" "M"

"1000000000" "Yes" "M"

"1000000000" "Yes" "M"

"1000000000" "Yes" "M"

"1000000000" "Yes" "M"

"1100000000" "Yes" "M"

"1000000000" "Yes" "M"

"1100000000" "Yes" "F"

"1000000000" "Yes" "M"

"1000000000" "Yes" "F"

"1000000000" "Yes" "M"

"1000000000" "Yes" "M"

"1000000000" "Yes" "F"

"1000000000" "Yes" "M"

"1000000000" "Yes" "M"

"1000000000" "Yes" "M"

"1000000000" "Yes" "F"

"1000000000" "Yes" "M"

"1100000000" "Yes" "F"

"1000000000" "Yes" "F"

"1000000000" "Yes" "F"

"1000000000" "Yes" "F"

"1000000000" "Yes" "M"

"1000000000" "Yes" "F"

"1000000000" "Yes" "F"

"1000000000" "Yes" "F"

"1000000000" "Yes" "F"

"1000000000" "Yes" "F"

"1000000000" "Yes" "F"

"1000000000" "Yes" "F"

"1000000000" "Yes" "F"

"1000000000" "Yes" "F"

"1000000000" "Yes" "M"

"1000000000" "Yes" "F"

"1000000000" "Yes" "F"

"1000000000" "Yes" "M"

"1000000000" "Yes" "M"

"1000000000" "Yes" "F"

"1000000000" "Yes" "F"

"1000000000" "Yes" "F"

"1100000000" "Yes" "F"

"1000000000" "Yes" "F"

"1000000000" "Yes" "M"

"1000000000" "Yes" "M"

"1000000000" "Yes" "M"

"1000000000" "Yes" "F"

"1000000000" "Yes" "F"

"1000000000" "Yes" "F"

"1010000000" "Yes" "M"

"1000000000" "Yes" "F"

"1000000000" "Yes" "M"

"1000000000" "Yes" "F"

"1000000000" "Yes" "F"

"1000000000" "Yes" "M"

"1000000000" "Yes" "M"

"1000000000" "Yes" "F"

"1000000000" "Yes" "F"

"1000000000" "Yes" "F"

"1000000000" "Yes" "M"

"1000000000" "Yes" "F"

"1000000000" "Yes" "F"

"1000000000" "Yes" "F"

"1000000000" "Yes" "F"

"1000000000" "Yes" "F"

"1000000000" "Yes" "M"

"1000000000" "Yes" "M"

"1000000000" "Yes" "M"

"1000000000" "Yes" "F"

"1000000000" "Yes" "F"

"1000000000" "Yes" "F"

"1000000000" "Yes" "F"

"1000000000" "Yes" "F"

"1000000000" "Yes" "F"

"1000000000" "Yes" "F"

"1000000000" "Yes" "F"

"1000000000" "Yes" "F"

"1000000100" "Yes" "F"

"1000000000" "Yes" "F"

"1000000000" "Yes" "F"

"1000000000" "Yes" "F"

"1000000000" "Yes" "F"

"1000000000" "Yes" "F"

"1000000000" "Yes" "F"

"1000000000" "Yes" "F"

"1000000000" "Yes" "F"

"1000000000" "Yes" "M"

"1000000000" "Yes" "M"

"1000000000" "Yes" "M"

"1100000000" "Yes" "M"

"1000000000" "Yes" "M"

"1000000000" "Yes" "F"

"1000000000" "Yes" "F"

"1000000000" "Yes" "F"

"1000000000" "Yes" "F"

"1000000000" "Yes" "F"

"1000000000" "Yes" "F"

"1000000000" "Yes" "F"

"1000000000" "Yes" "F"

"1000000000" "Yes" "F"

"1000000000" "Yes" "F"

"1000000000" "Yes" "F"

"1000000000" "Yes" "F"

"1000000000" "Yes" "F"

"1000000000" "Yes" "F"

"1000000000" "Yes" "F"

"1000000000" "Yes" "F"

"1000000000" "Yes" "F"

"1000000000" "Yes" "F"

"1000000000" "Yes" "F"

"1000000000" "Yes" "F"

"1000000000" "Yes" "M"

"1000000000" "Yes" "M"

"1000000000" "Yes" "M"

"1000000000" "Yes" "M"

"1000000000" "Yes" "M"

"1000000000" "Yes" "M"

"1000000000" "Yes" "M"

"1000000000" "Yes" "M"

"1000000000" "Yes" "M"

"1000000000" "Yes" "M"

"1000000000" "Yes" "F"

"1000000000" "Yes" "F"

"1000000000" "Yes" "F"

"1000000000" "Yes" "F"

"1000000000" "Yes" "F"

"1000000000" "Yes" "F"

"1000000000" "Yes" "M"

"1000000000" "Yes" "M"

"1000000000" "Yes" "M"

"1000000000" "Yes" "M"

"1000000000" "Yes" "M"

"1000000000" "Yes" "F"

"1000000000" "Yes" "F"

"1000000000" "Yes" "F"

"1000000000" "Yes" "F"

"1000000000" "Yes" "F"

"1000000000" "Yes" "F"

"1000000000" "Yes" "M"

"1000000000" "Yes" "F"

"1100000000" "Yes" "M"

"1000000000" "Yes" "F"

"1000000000" "Yes" "M"

"1000000000" "Yes" "M"

"1000000000" "Yes" "M"

"1000000000" "Yes" "F"

"1000000000" "Yes" "F"

"1000000000" "Yes" "M"

"1000000000" "Yes" "M"

"1000000000" "Yes" "F"

"1000000000" "Yes" "F"

"1000000000" "Yes" "M"

"1000000000" "Yes" "M"

"1000000000" "Yes" "M"

"1000000000" "Yes" "M"

"1000000000" "Yes" "M"

"1000000000" "Yes" "M"

"1000000000" "Yes" "F"

"1000000000" "Yes" "M"

"1000000000" "Yes" "F"

"1000000000" "Yes" "M"

"1000000000" "Yes" "F"

"1000000000" "Yes" "F"

"1000000000" "Yes" "M"

"1000000000" "Yes" "F"

"1000000000" "Yes" "M"

"1001000000" "Yes" "F"

"1000000000" "Yes" "F"

"1000000000" "Yes" "F"

"1000000000" "Yes" "F"

"1000000000" "Yes" "M"

"1000000000" "Yes" "F"

"1000000000" "Yes" "M"

"1000000000" "Yes" "M"

"1000000000" "Yes" "M"

"1000000000" "Yes" "F"

"1000000000" "Yes" "F"

"1000000000" "Yes" "F"

"1000000000" "Yes" "M"

"1000000000" "Yes" "F"

"1000000000" "Yes" "M"

"1000000000" "Yes" "M"

"1000000000" "Yes" "F"

"1000000000" "Yes" "F"

"1000000000" "Yes" "F"

"1000000000" "Yes" "M"

"1000000000" "Yes" "F"

"1000000000" "Yes" "F"

"1000000000" "Yes" "M"

"1000000000" "Yes" "F"

"1000000000" "Yes" "F"

"1000000000" "Yes" "M"

"1000000000" "Yes" "M"

"1000000000" "Yes" "M"

"1000000000" "Yes" "M"

"1000000000" "Yes" "M"

"1000000000" "Yes" "F"

"1000000000" "Yes" "M"

"1000000000" "Yes" "F"

"1000000000" "Yes" "F"

"1000000000" "Yes" "M"

"1000000000" "Yes" "F"

"1000000000" "Yes" "M"

"1000000000" "Yes" "F"

"1000000000" "Yes" "M"

"1000010000" "Yes" "M"

"1000000000" "Yes" "M"

"1000000000" "Yes" "M"

"1000000000" "Yes" "M"

"1000000000" "Yes" "M"

"1000000000" "Yes" "F"

"1000000000" "Yes" "M"

"1100000000" "Yes" "F"

"1000000000" "Yes" "F"

"1000000000" "Yes" "M"

"1000000000" "Yes" "M"

"1000000000" "Yes" "M"

"1000000000" "Yes" "F"

"1000000000" "Yes" "F"

"1000000000" "Yes" "M"

"1000100000" "Yes" "M"

"1000000000" "Yes" "F"

"1000000000" "Yes" "M"

"1000000000" "Yes" "M"

"1000000000" "Yes" "M"

"1000000000" "Yes" "F"

"1000000000" "Yes" "M"

"1000000000" "Yes" "M"

"1000000000" "Yes" "F"

"1100000000" "Yes" "F"

"1000000000" "Yes" "M"

"1000000000" "Yes" "F"

"1000000000" "Yes" "M"

"1000000000" "Yes" "M"

"1000000000" "Yes" "F"

"1000000000" "Yes" "F"

"1000000000" "Yes" "M"

"1000000000" "Yes" "F"

"1000000000" "Yes" "F"

"1000000000" "Yes" "F"

"1000000000" "Yes" "F"

"1000000000" "Yes" "M"

"1000000000" "Yes" "F"

"1000000000" "Yes" "M"

"1000000000" "Yes" "M"

"1100000000" "Yes" "M"

"1000000000" "Yes" "F"

"1000000000" "Yes" "F"

"1000000000" "Yes" "M"

"1000000000" "Yes" "F"

"1100000000" "Yes" "F"

"1000000000" "Yes" "F"

"1000000000" "Yes" "M"

"1000000000" "Yes" "F"

"1000000000" "Yes" "M"

"1000000000" "Yes" "F"

"1000000000" "Yes" "F"

"1000000000" "Yes" "F"

"1000000000" "Yes" "F"

"1000000000" "Yes" "M"

"1001000000" "Yes" "M"

"1000000000" "Yes" "F"

"1000000000" "Yes" "M"

"1000000000" "Yes" "M"

"1001000000" "Yes" "M"

"1000000000" "Yes" "F"

"1000000000" "Yes" "F"

"1000000000" "Yes" "M"

"1000000000" "Yes" "M"

"1000000000" "Yes" "M"

"1000000000" "Yes" "M"

"1000000000" "Yes" "M"

"1000000000" "Yes" "F"

"1000000000" "Yes" "M"

"1000000000" "Yes" "M"

"1000000000" "Yes" "F"

"1000000000" "Yes" "M"

"1000000000" "Yes" "F"

"1000000000" "Yes" "M"

"1000000000" "Yes" "F"

"1000000000" "Yes" "F"

"1000000000" "Yes" "F"

"1000000000" "Yes" "F"

"1000000000" "Yes" "F"

"1000000000" "Yes" "F"

"1000000000" "Yes" "M"

"1000000000" "Yes" "M"

"1000000000" "Yes" "F"

"1000000000" "Yes" "F"

"1000000000" "Yes" "F"

"1000000000" "Yes" "F"

"1000000000" "Yes" "F"

"1000000000" "Yes" "M"

"1000000000" "Yes" "M"

"1000000000" "Yes" "M"

"1000000000" "Yes" "F"

"1000000000" "Yes" "M"

"1000000000" "Yes" "F"

"1000000000" "Yes" "F"

"1000000000" "Yes" "F"

"1000000000" "Yes" "F"

"1000001000" "Yes" "M"

"1000000000" "Yes" "M"

"1000000000" "Yes" "F"

"1000000000" "Yes" "M"

"1000000000" "Yes" "M"

"1000000000" "Yes" "F"

"1000000000" "Yes" "F"

"1000000000" "Yes" "F"

"1000000000" "Yes" "M"

"1000000000" "Yes" "F"

"1000000000" "Yes" "F"

"1000000000" "Yes" "M"

"1100000000" "Yes" "F"

"1000000000" "Yes" "M"

"1000000000" "Yes" "M"

"1000000000" "Yes" "F"

"1000000000" "Yes" "M"

"1000000000" "Yes" "F"

"1000000000" "Yes" "M"

"1000000000" "Yes" "F"

"1000000000" "Yes" "M"

"1000000000" "Yes" "F"

"1000000000" "Yes" "F"

"1000000000" "Yes" "M"

"1000000000" "Yes" "F"

"1000000000" "Yes" "F"

"1000000000" "Yes" "M"

"1000000000" "Yes" "F"

"1000000000" "Yes" "F"

"1000000000" "Yes" "F"

"1000000000" "Yes" "F"

"1000000000" "Yes" "M"

"1000000000" "Yes" "M"

"1000000000" "Yes" "M"

"1000000000" "Yes" "F"

"1000000000" "Yes" "M"

"1000000000" "Yes" "F"

"1000000000" "Yes" "F"

"1000000000" "Yes" "M"

"1000000001" "Yes" "M"

"1000000000" "Yes" "M"

"1000000000" "Yes" "F"

"1000000000" "Yes" "F"

"1000000000" "Yes" "F"

"1000010000" "Yes" "F"

"1000000000" "Yes" "F"

"1000000000" "Yes" "M"

"1000000000" "Yes" "M"

"1000000000" "Yes" "M"

"1000000000" "Yes" "F"

"1000000000" "Yes" "F"

"1000000000" "Yes" "M"

"1000000000" "Yes" "M"

"1000000000" "Yes" "F"

"1000000000" "Yes" "F"

"1000000000" "Yes" "M"

"1000000000" "Yes" "F"

"1000000000" "Yes" "M"

"1000000000" "Yes" "M"

"1000000000" "Yes" "M"

"1000000000" "Yes" "F"

"1000000000" "Yes" "M"

"1000000000" "Yes" "F"

"1000000000" "Yes" "F"

"1000000000" "Yes" "M"

"1000000000" "Yes" "M"

"1000000000" "Yes" "F"

"1000000000" "Yes" "M"

"1000000000" "Yes" "M"

"1000000000" "Yes" "M"

"1000000000" "Yes" "F"

"1000000000" "Yes" "F"

"1000000000" "Yes" "M"

"1000000000" "Yes" "F"

"1000000000" "Yes" "M"

"1000000000" "Yes" "F"

"1000000000" "Yes" "F"

"1000000000" "Yes" "M"

"1000000000" "Yes" "M"

"1000000000" "Yes" "F"

"1000000000" "Yes" "F"

"1000000000" "Yes" "F"

"1000000000" "Yes" "F"

"1000000000" "Yes" "F"

"1000000000" "Yes" "F"

"1000000000" "Yes" "M"

"1000000000" "Yes" "F"

"1000000000" "Yes" "F"

"1000000000" "Yes" "F"

"1000000000" "Yes" "F"

"1000000000" "Yes" "F"

"1000000000" "Yes" "F"

"1000000000" "Yes" "M"

"1000000000" "Yes" "M"

"1000000000" "Yes" "M"

"1000000000" "Yes" "F"

"1000000000" "Yes" "M"

"1000000000" "Yes" "M"

"1000000000" "Yes" "M"

"1000000000" "Yes" "M"

"1000000000" "Yes" "M"

"1000000000" "Yes" "M"

"1000000000" "Yes" "F"

"1000000000" "Yes" "M"

"1000000000" "Yes" "M"

"1000000000" "Yes" "F"

"1000000000" "Yes" "M"

"1000000000" "Yes" "M"

"1000000000" "Yes" "M"

"1000000000" "Yes" "F"

"1000000000" "Yes" "M"

"1000000000" "Yes" "M"

"1000000000" "Yes" "M"

"1000000000" "Yes" "F"

"1000000000" "Yes" "M"

"1000000000" "Yes" "F"

"1000000000" "Yes" "F"

"1000000000" "Yes" "F"

"1000000000" "Yes" "M"

"1000000000" "Yes" "F"

"1000000000" "Yes" "M"

"1000000000" "Yes" "M"

"1000000000" "Yes" "F"

"1000000000" "Yes" "M"

"1000000000" "Yes" "F"

"1000000000" "Yes" "F"

"1000000000" "Yes" "M"

"1000000000" "Yes" "M"

"1000000000" "Yes" "M"

"1000000000" "Yes" "M"

"1000000000" "Yes" "F"

"1000000000" "Yes" "M"

"1000000000" "Yes" "F"

"1000000000" "Yes" "M"

"1000000000" "Yes" "F"

"1000000000" "Yes" "M"

"1000000000" "Yes" "F"

"1000000000" "Yes" "M"

"1000000000" "Yes" "M"

"1000000000" "Yes" "M"

"1000000000" "Yes" "M"

"1000000000" "Yes" "F"

"1000000000" "Yes" "F"

"1001000000" "Yes" "M"

"1000000000" "Yes" "F"

"1000000000" "Yes" "M"

"1000000000" "Yes" "M"

"1000000000" "Yes" "M"

"1000000000" "Yes" "M"

"1000000000" "Yes" "M"

"1000000000" "Yes" "M"

"1000000000" "Yes" "M"

"1000000000" "Yes" "F"

"1000000000" "Yes" "F"

"1000000000" "Yes" "M"

"1000000000" "Yes" "M"

"1100000000" "Yes" "M"

"1000000000" "Yes" "M"

"1000000000" "Yes" "F"

"1000000000" "Yes" "F"

"1000000000" "Yes" "M"

"1000000000" "Yes" "M"

"1000000000" "Yes" "M"

"1000000000" "Yes" "F"

"1000000000" "Yes" "M"

"1000000000" "Yes" "M"

"1000000000" "Yes" "M"

"1000000000" "Yes" "M"

"1000000000" "Yes" "M"

"1000000000" "Yes" "F"

"1000000000" "Yes" "M"

"1000000000" "Yes" "M"

"1000000000" "Yes" "M"

"1000000000" "Yes" "M"

"1000000000" "Yes" "M"

"1000000000" "Yes" "F"

"1000000000" "Yes" "M"

"1000000000" "Yes" "M"

"1000000000" "Yes" "M"

"1000000000" "Yes" "M"

"1000000000" "Yes" "F"

"1000000000" "Yes" "F"

"1000000000" "Yes" "M"

"1000000000" "Yes" "F"

"1000000000" "Yes" "F"

"1000000000" "Yes" "M"

"1000000000" "Yes" "M"

"1000000000" "Yes" "M"

"1000000000" "Yes" "M"

"1000000000" "Yes" "M"

"1000000000" "Yes" "F"

"1000000000" "Yes" "M"

"1000000000" "Yes" "F"

"1000000000" "Yes" "F"

"1000000000" "Yes" "M"

"1000000000" "Yes" "M"

"1000000000" "Yes" "F"

"1000000000" "Yes" "F"

"1000000000" "Yes" "M"

"1000000000" "Yes" "F"

"1000000000" "Yes" "M"

"1000000000" "Yes" "F"

"1000000000" "Yes" "F"

"1000000000" "Yes" "F"

"1000000000" "Yes" "F"

"1000000000" "Yes" "M"

"1000000000" "Yes" "M"

"1000000000" "Yes" "M"

"1000000000" "Yes" "M"

"1000000000" "Yes" "M"

"1000000000" "Yes" "M"

"1000000000" "Yes" "F"

"1000000000" "Yes" "M"

"1000000000" "Yes" "M"

"1000000000" "Yes" "M"

"1000000000" "Yes" "F"

"1000000000" "Yes" "F"

"1000000000" "Yes" "M"

"1000000000" "Yes" "M"

"1000000000" "Yes" "F"

"1001000000" "Yes" "F"

"1000000000" "Yes" "M"

"1000000000" "Yes" "M"

"1000000000" "Yes" "F"

"1000000000" "Yes" "M"

"1000000000" "Yes" "F"

"1000000000" "Yes" "M"

"1000000000" "Yes" "F"

"1000000000" "Yes" "F"

"1000000000" "Yes" "M"

"1000000000" "Yes" "F"

"1000100000" "Yes" "F"

"1000000000" "Yes" "M"

"1000000000" "Yes" "F"

"1000000000" "Yes" "F"

"1000000000" "Yes" "F"

"1100000000" "Yes" "M"

"1000000000" "Yes" "M"

"1000000000" "Yes" "F"

"1000000000" "Yes" "M"

"1000000000" "Yes" "F"

"1000000000" "Yes" "F"

"1000000000" "Yes" "M"

"1000000000" "Yes" "M"

"1000000000" "Yes" "M"

"1000000000" "Yes" "F"

"1000000000" "Yes" "F"

"1000000000" "Yes" "F"

"1000000000" "Yes" "F"

"1000000000" "Yes" "M"

"1000000000" "Yes" "F"

"1000000000" "Yes" "M"

"1000000000" "Yes" "M"

"1000000000" "Yes" "M"

"1000000000" "Yes" "M"

"1000000000" "Yes" "F"

"1000000000" "Yes" "M"

"1000000000" "Yes" "F"

"1000000000" "Yes" "M"

"1000000000" "Yes" "M"

"1000000000" "Yes" "M"

"1000100000" "Yes" "F"

"1000000000" "Yes" "M"

"1000000000" "Yes" "F"

"1000000000" "Yes" "M"

"1000000000" "Yes" "F"

"1000000000" "Yes" "F"

"1000000000" "Yes" "M"

"1000000000" "Yes" "F"

"1000000000" "Yes" "M"

"1000000000" "Yes" "M"

"1000000000" "Yes" "M"

"1000000000" "Yes" "F"

"1000000000" "Yes" "F"

"1000000000" "Yes" "M"

"1000000000" "Yes" "M"

"1000000000" "Yes" "F"

"1000000000" "Yes" "M"

"1000000000" "Yes" "M"

"1000000000" "Yes" "M"

"1000000000" "Yes" "M"

"1000000000" "Yes" "M"

"1000000000" "Yes" "F"

"1000000000" "Yes" "M"

"1000000000" "Yes" "M"

"1000000000" "Yes" "M"

"1000000000" "Yes" "M"

"1000000000" "Yes" "M"

"1000000000" "Yes" "M"

"1000000000" "Yes" "F"

"1000000000" "Yes" "M"

"1000000000" "Yes" "M"

"1000000000" "Yes" "M"

"1000000000" "Yes" "F"

"1000000000" "Yes" "F"

"1000000000" "Yes" "M"

"1000000000" "Yes" "F"

"1000000000" "Yes" "M"

"1000000000" "Yes" "M"

"1000000000" "Yes" "F"

"1000000000" "Yes" "F"

"1000000000" "Yes" "F"

"1000000000" "Yes" "F"

"1000000000" "Yes" "F"

"1000000000" "Yes" "F"

"1000000000" "Yes" "M"

"1000000000" "Yes" "F"

"1000000000" "Yes" "M"

"1000000000" "Yes" "F"

"1000000000" "Yes" "F"

"1000000000" "Yes" "M"

"1000000000" "Yes" "F"

"1000000000" "Yes" "F"

"1000000000" "Yes" "M"

"1000000000" "Yes" "M"

"1000000000" "Yes" "M"

"1000000000" "Yes" "M"

"1000000000" "Yes" "M"

"1000000000" "Yes" "M"

"1000000000" "Yes" "M"

"1000000000" "Yes" "M"

"1000000000" "Yes" "F"

"1000000000" "Yes" "F"

"1000000000" "Yes" "F"

"1000000000" "Yes" "F"

"1000000000" "Yes" "F"

"1000000000" "Yes" "F"

"1000000000" "Yes" "F"

"1000000000" "Yes" "F"

"1000000000" "Yes" "F"

"1000000000" "Yes" "F"

"1000000000" "Yes" "F"

"1000000000" "Yes" "F"

"1000000000" "Yes" "F"

"1000000000" "Yes" "F"

"1000000000" "Yes" "F"

"1000000000" "Yes" "F"

"1000000000" "Yes" "M"

"1000000000" "Yes" "F"

"1000000000" "Yes" "M"

"1000000000" "Yes" "F"

"1000000000" "Yes" "F"

"1000000000" "Yes" "F"

"1000000000" "Yes" "F"

"1000000000" "Yes" "F"

"1000000000" "Yes" "F"

"1000000000" "Yes" "F"

"1000000000" "Yes" "F"

"1000000000" "Yes" "M"

"1000000000" "Yes" "M"

"1000000000" "Yes" "F"

"1000000000" "Yes" "F"

"1000000000" "Yes" "M"

"1000000000" "Yes" "M"

"1000000000" "Yes" "F"

"1000000000" "Yes" "F"

"1000000000" "Yes" "F"

"1000000000" "Yes" "F"

"1000000000" "Yes" "F"

"1000000000" "Yes" "M"

"1000000000" "Yes" "F"

"1000000000" "Yes" "M"

"1000000000" "Yes" "F"

"1000000000" "Yes" "M"

"1000000000" "Yes" "F"

"1000000000" "Yes" "F"

"1000000000" "Yes" "F"

"1000000000" "Yes" "F"

"1000000000" "Yes" "M"

"1000000000" "Yes" "F"

"1000000000" "Yes" "F"

"1100000000" "Yes" "F"

"1000000000" "Yes" "F"

"1000000000" "Yes" "M"

"1000000000" "Yes" "F"

"1000000000" "Yes" "M"

"1000000000" "Yes" "F"

"1000000000" "Yes" "F"

"1000000000" "Yes" "M"

"1000000000" "Yes" "F"

"1000000000" "Yes" "F"

"1000000000" "Yes" "M"

"1000000000" "Yes" "M"

"1000000000" "Yes" "F"

"1000000000" "Yes" "F"

"1000000000" "Yes" "M"

"1000000000" "Yes" "M"

"1000000000" "Yes" "M"

"1000000000" "Yes" "F"

"1000000000" "Yes" "M"

"1000000000" "Yes" "F"

"1000000000" "Yes" "F"

"1000000000" "Yes" "F"

"1000000000" "Yes" "M"

"1000000000" "Yes" "M"

"1000000000" "Yes" "M"

"1000000000" "Yes" "F"

"1000000000" "Yes" "M"

"1000000000" "Yes" "M"

"1000000000" "Yes" "F"

"1000000000" "Yes" "F"

"1000000000" "Yes" "F"

"1000000000" "Yes" "M"

"1000000000" "Yes" "M"

"1000000000" "Yes" "M"

"1000000000" "Yes" "M"

"1000000000" "Yes" "F"

"1000000000" "Yes" "F"

"1000000000" "Yes" "M"

"1000000000" "Yes" "M"

"1000000000" "Yes" "M"

"1000000000" "Yes" "F"

"1000000000" "Yes" "F"

"1000000000" "Yes" "F"

"1000000000" "Yes" "M"

"1000000000" "Yes" "F"

"1000000000" "Yes" "F"

"1000000000" "Yes" "M"

"1000000000" "Yes" "M"

"1000000000" "Yes" "M"

"1000000000" "Yes" "M"

"1000000000" "Yes" "F"

"1000000000" "Yes" "M"

"1000000000" "Yes" "F"

"1000000000" "Yes" "F"

"1000000000" "Yes" "F"

"1000000000" "Yes" "M"

"1000000000" "Yes" "F"

"1100000000" "Yes" "F"

"1000000000" "Yes" "F"

"1000000000" "Yes" "M"

"1000000000" "Yes" "M"

"1000000000" "Yes" "M"

"1000000000" "Yes" "M"

"1000000000" "Yes" "F"

"1000000000" "Yes" "M"

"1000000000" "Yes" "F"

"1000000000" "Yes" "M"

"1000000000" "Yes" "F"

"1000000000" "Yes" "M"

"1000000000" "Yes" "F"

"1000000000" "Yes" "M"

"1000000000" "Yes" "F"

"1000000000" "Yes" "F"

"1000000000" "Yes" "M"

"1000000000" "Yes" "M"

"1000000000" "Yes" "M"

"1000000000" "Yes" "F"

"1000000000" "Yes" "M"

"1000000000" "Yes" "M"

"1000000000" "Yes" "M"

"1000000000" "Yes" "M"

"1100000000" "Yes" "M"

"1000000000" "Yes" "M"

"1000000000" "Yes" "M"

"1000000000" "Yes" "M"

"1000000000" "Yes" "M"

"1000000000" "Yes" "M"

"1000000000" "Yes" "M"

"1000000000" "Yes" "M"

"1000000000" "Yes" "F"

"1000000000" "Yes" "M"

"1000000000" "Yes" "M"

"1000000000" "Yes" "M"

"1000000000" "Yes" "F"

"1000000000" "Yes" "F"

"1000000000" "Yes" "M"

"1000000000" "Yes" "M"

"1000000000" "Yes" "F"

"1000000000" "Yes" "M"

"1000000000" "Yes" "F"

"1000000000" "Yes" "M"

"1000000000" "Yes" "M"

"1000000000" "Yes" "M"

"1000000000" "Yes" "M"

"1000000000" "Yes" "F"

"1000000000" "Yes" "M"

"1000000000" "Yes" "M"

"1000000000" "Yes" "F"

"1000000000" "Yes" "M"

"1001000000" "Yes" "M"

"1000000000" "Yes" "F"

"1000000000" "Yes" "M"

"1000000000" "Yes" "M"

"1000000000" "Yes" "M"

"1000000000" "Yes" "M"

"1000000000" "Yes" "M"

"1000000000" "Yes" "M"

"1000000000" "Yes" "F"

"1000000000" "Yes" "F"

"1000000000" "Yes" "F"

"1000000000" "Yes" "F"

"1000000000" "Yes" "F"

"1000000000" "Yes" "M"

"1000000000" "Yes" "M"

"1000000000" "Yes" "F"

"1000000000" "Yes" "F"

"1000000000" "Yes" "F"

"1000000000" "Yes" "M"

"1010000000" "Yes" "M"

"1000000000" "Yes" "M"

"1000000000" "Yes" "M"

"1010000000" "Yes" "M"

"1000000000" "Yes" "M"

"1010000000" "Yes" "M"

"1010000000" "Yes" "M"

"1000000000" "Yes" "M"

"1010000000" "Yes" "M"

"1100000000" "Yes" "F"

"1000000000" "Yes" "M"

"1000000000" "Yes" "M"

"1000000000" "Yes" "F"

"1000000000" "Yes" "F"

"1000000000" "Yes" "M"

"1000000000" "Yes" "M"

"1000000000" "Yes" "M"

"1000000000" "Yes" "M"

"1000000000" "Yes" "M"

"1000000000" "Yes" "M"

"1000000000" "Yes" "M"

"1000000000" "Yes" "M"

"1000000000" "Yes" "M"

"1000000000" "Yes" "M"

"1000000000" "Yes" "F"

"1000000000" "Yes" "M"

"1100000000" "Yes" "F"

"1000000000" "Yes" "M"

"1000000000" "Yes" "M"

"1010000000" "Yes" "F"

"1000000000" "Yes" "M"

"1000000000" "Yes" "M"

"1000000000" "Yes" "M"

"1000000000" "Yes" "F"

"1010000000" "Yes" "M"

"1000000000" "Yes" "M"

"1010000000" "Yes" "M"

"1000000000" "Yes" "F"

"1000000000" "Yes" "F"

"1000000000" "Yes" "M"

"1010000000" "Yes" "M"

"1000000000" "Yes" "F"

"1000000000" "Yes" "M"

"1000000000" "Yes" "F"

"1010000000" "Yes" "M"

"1000000000" "Yes" "M"

"1010000000" "Yes" "M"

"1100000000" "Yes" "M"

"1000000000" "Yes" "M"

"1000000000" "Yes" "M"

"1000000000" "Yes" "M"

"1000000000" "Yes" "M"

"1000000000" "Yes" "M"

"1100000000" "Yes" "M"

"1010000000" "Yes" "F"

"1000000000" "Yes" "M"

"1000000000" "Yes" "M"

"1000000000" "Yes" "M"

"1000000000" "Yes" "M"

"1100000000" "Yes" "M"

"1000000000" "Yes" "M"

"1000000000" "Yes" "M"

"1000000000" "Yes" "M"

"1000000000" "Yes" "M"

"1000000000" "Yes" "M"

"1000000000" "Yes" "M"

"1000000000" "Yes" "M"

"1000000000" "Yes" "F"

"1000000000" "Yes" "M"

"1000000000" "Yes" "M"

"1000000000" "Yes" "M"

"1000000000" "Yes" "F"

"1000000000" "Yes" "M"

"1000000000" "Yes" "M"

"1000000000" "Yes" "M"

"1000000000" "Yes" "M"

"1000000000" "Yes" "M"

"1100000000" "Yes" "F"

"1000000000" "Yes" "F"

"1000000000" "Yes" "M"

"1000000000" "Yes" "F"

"1000000000" "Yes" "M"

"1000000000" "Yes" "M"

"1000000000" "Yes" "M"

"1000000000" "Yes" "M"

"1000000000" "Yes" "M"

"1000000000" "Yes" "M"

"1000000000" "Yes" "F"

"1000000000" "Yes" "M"

"1000000000" "Yes" "M"

"1000000000" "Yes" "F"

"1000000000" "Yes" "M"

"1100000000" "Yes" "M"

"1000000000" "Yes" "F"

"1000000000" "Yes" "M"

"1000000000" "Yes" "M"

"1000000000" "Yes" "M"

"1000000000" "Yes" "F"

"1000000000" "Yes" "F"

"1000000000" "Yes" "M"

"1010000000" "Yes" "M"

"1000000000" "Yes" "M"

"1000000000" "Yes" "F"

"1010000000" "Yes" "F"

"1000000000" "Yes" "F"

"1100000000" "Yes" "F"

"1000000000" "Yes" "F"

"1000000000" "Yes" "F"

"1000000000" "Yes" "F"

"1000000000" "Yes" "F"

"1010000000" "Yes" "F"

"1000000000" "Yes" "F"

"1000000000" "Yes" "M"

"1000000000" "Yes" "M"

"1000000000" "Yes" "M"

"1010000000" "Yes" "M"

"1000000000" "Yes" "M"

"1000000000" "Yes" "M"

"1000000000" "Yes" "F"

"1000000000" "Yes" "M"

"1000000000" "Yes" "F"

"1000000000" "Yes" "M"

"1000000000" "Yes" "M"

"1000000000" "Yes" "M"

"1000000000" "Yes" "M"

"1000000000" "Yes" "M"

"1000000000" "Yes" "M"

"1000000000" "Yes" "F"

"1000000000" "Yes" "M"

"1000000000" "Yes" "M"

"1000000000" "Yes" "M"

"1000000000" "Yes" "M"

"1000000000" "Yes" "M"

"1000000000" "Yes" "M"

"1000000000" "Yes" "M"

"1000000000" "Yes" "F"

"1000000000" "Yes" "F"

"1000000000" "Yes" "M"

"1000000000" "Yes" "M"

"1000000000" "Yes" "M"

"1000000000" "Yes" "M"

"1000000000" "Yes" "M"

"1000000000" "Yes" "F"

"1000000000" "Yes" "M"

"1000000000" "Yes" "M"

"1000000000" "Yes" "M"

"1000000000" "Yes" "M"

"1000000000" "Yes" "M"

"1000000000" "Yes" "M"

"1000000000" "Yes" "M"

"1001000000" "Yes" "M"

"1000000000" "Yes" "M"

"1000000000" "Yes" "M"

"1000000000" "Yes" "F"

"1000000000" "Yes" "M"

"1000000000" "Yes" "M"

"1000000000" "Yes" "M"

"1100000000" "Yes" "F"

"1000000000" "Yes" "M"

"1000000000" "Yes" "M"

"1000000000" "Yes" "F"

"1000000000" "Yes" "M"

"1000000000" "Yes" "F"

"1000000000" "Yes" "M"

"1000000000" "Yes" "M"

"1000000000" "Yes" "M"

"1000000000" "Yes" "M"

"1000000000" "Yes" "F"

"1000000000" "Yes" "M"

"1000100000" "Yes" "M"

"1000000000" "Yes" "M"

"1000000000" "Yes" "M"

"1000000000" "Yes" "F"

"1000000000" "Yes" "F"

"1000000000" "Yes" "M"

"1000000000" "Yes" "F"

"1000000000" "Yes" "M"

"1100000000" "Yes" "M"

"1000000000" "Yes" "M"

"1000000000" "Yes" "M"

"1000000000" "Yes" "M"

"1000000000" "Yes" "M"

"1000000000" "Yes" "F"

"1000000000" "Yes" "M"

"1000000000" "Yes" "M"

"1000000000" "Yes" "M"

"1000000000" "Yes" "M"

"1000000000" "Yes" "M"

"1000000000" "Yes" "M"

"1000000000" "Yes" "M"

"1000000000" "Yes" "M"

"1000000000" "Yes" "M"

"1100000000" "Yes" "M"

"1000000000" "Yes" "F"

"1000000000" "Yes" "M"

"1000000000" "Yes" "M"

"1000000000" "Yes" "F"

"1000000000" "Yes" "F"

"1000000000" "Yes" "M"

"1000000000" "Yes" "M"

"1000000000" "Yes" "F"

"1000000000" "Yes" "M"

"1000000000" "Yes" "F"

"1000000000" "Yes" "F"

"1000000000" "Yes" "F"

"1000000000" "Yes" "F"

"1000000000" "Yes" "F"

"1000000000" "Yes" "M"

"1101000000" "Yes" "M"

"1000000000" "Yes" "F"

"1000000000" "Yes" "F"

"1000000000" "Yes" "M"

"1000000000" "Yes" "F"

"1000000000" "Yes" "F"

"1000000000" "Yes" "F"

"1000000000" "Yes" "F"

"1000000000" "Yes" "F"

"1000000000" "Yes" "M"

"1000000000" "Yes" "F"

"1000000000" "Yes" "F"

"1000000000" "Yes" "F"

"1000000000" "Yes" "F"

"1000000000" "Yes" "F"

"1100000000" "Yes" "M"

"1000000000" "Yes" "M"

"1000000000" "Yes" "M"

"1000000000" "Yes" "M"

"1000001000" "Yes" "M"

"1000000000" "Yes" "M"

"1000000000" "Yes" "M"

"1000000000" "Yes" "F"

"1000000000" "Yes" "M"

"1000000000" "Yes" "M"

"1000000000" "Yes" "F"

"1000000000" "Yes" "M"

"1000000000" "Yes" "F"

"1100000000" "Yes" "M"

"1000000000" "Yes" "M"

"1000000000" "Yes" "F"

"1000000000" "Yes" "M"

"1000000000" "Yes" "M"

"1000000000" "Yes" "M"

"1000000000" "Yes" "M"

"1000000000" "Yes" "M"

"1000000000" "Yes" "M"

"1000000000" "Yes" "F"

"1000000000" "Yes" "F"

"1000000000" "Yes" "M"

"1000000000" "Yes" "F"

"1000000000" "Yes" "M"

"1000000000" "Yes" "M"

"1000000000" "Yes" "F"

"1000000000" "Yes" "F"

"1000000000" "Yes" "F"

"1000000000" "Yes" "F"

"1000000000" "Yes" "M"

"1000000000" "Yes" "F"

"1000000000" "Yes" "M"

"1000000000" "Yes" "M"

"1000000000" "Yes" "M"

"1000000000" "Yes" "F"

"1000000000" "Yes" "M"

"1000000000" "Yes" "M"

"1000000000" "Yes" "M"

"1000000000" "Yes" "M"

"1000000000" "Yes" "F"

"1000000000" "Yes" "M"

"1000000000" "Yes" "F"

"1000000000" "Yes" "M"

"1000000000" "Yes" "F"

"1000000000" "Yes" "F"

"1000000000" "Yes" "F"

"1001000000" "Yes" "M"

"1000000000" "Yes" "F"

"1000000000" "Yes" "F"

"1000000000" "Yes" "M"

"1000000000" "Yes" "M"

"1000000000" "Yes" "F"

"1000000000" "Yes" "F"

"1000000000" "Yes" "F"

"1100000000" "Yes" "F"

"1000000000" "Yes" "F"

"1000000000" "Yes" "F"

"1000000000" "Yes" "M"

"1000000000" "Yes" "F"

"1000000000" "Yes" "F"

"1000000000" "Yes" "F"

"1000000000" "Yes" "F"

"1000000000" "Yes" "M"

"1000000000" "Yes" "M"

"1000000000" "Yes" "M"

"1000000000" "Yes" "F"

"1000000000" "Yes" "F"

"1000000000" "Yes" "F"

"1000000000" "Yes" "F"

"1000000000" "Yes" "M"

"1000000000" "Yes" "F"

"1000000000" "Yes" "F"

"1000000000" "Yes" "M"

"1000000000" "Yes" "M"

"1000000000" "Yes" "F"

"1000000000" "Yes" "F"

"1000000000" "Yes" "M"

"1000000000" "Yes" "M"

"1000000000" "Yes" "F"

"1000000000" "Yes" "M"

"1000000000" "Yes" "F"

"1000000000" "Yes" "M"

"1000000000" "Yes" "M"

"1000000000" "Yes" "M"

"1000000000" "Yes" "M"

"1000000000" "Yes" "F"

"1000000000" "Yes" "F"

"1000000000" "Yes" "M"

"1000000000" "Yes" "M"

"1000000000" "Yes" "F"

"1000000000" "Yes" "F"

"1000000000" "Yes" "M"

"1000000000" "Yes" "M"

"1000000000" "Yes" "M"

"1000000000" "Yes" "F"

"1000000000" "Yes" "M"

"1000000000" "Yes" "M"

"1000000000" "Yes" "M"

"1000000000" "Yes" "F"

"1000000000" "Yes" "F"

"1000000000" "Yes" "F"

"1000000000" "Yes" "M"

"1000000000" "Yes" "F"

"1000010000" "Yes" "M"

"1000000000" "Yes" "M"

"1001000000" "Yes" "F"

"1000000000" "Yes" "F"

"1000000000" "Yes" "M"

"1000000000" "Yes" "F"

"1000000000" "Yes" "M"

"1000000000" "Yes" "F"

"1000000000" "Yes" "F"

"1000000000" "Yes" "M"

"1000000000" "Yes" "M"

"1100000000" "Yes" "F"

"1000000000" "Yes" "F"

"1000000000" "Yes" "F"

"1000000000" "Yes" "F"

"1000000000" "Yes" "M"

"1000000000" "Yes" "F"

"1000000000" "Yes" "M"

"1000000000" "Yes" "M"

"1000000000" "Yes" "F"

"1000000000" "Yes" "M"

"1100000000" "Yes" "F"

"1000000000" "Yes" "F"

"1000000000" "Yes" "F"

"1000000000" "Yes" "F"

"1000000000" "Yes" "M"

"1000000000" "Yes" "M"

"1000100000" "Yes" "F"

"1000000000" "Yes" "M"

"1000000000" "Yes" "M"

"1000000000" "Yes" "F"

"1000000000" "Yes" "M"

"1000000000" "Yes" "M"

"1000000000" "Yes" "M"

"1000000000" "Yes" "M"

"1000000000" "Yes" "F"

"1000000000" "Yes" "M"

"1000000000" "Yes" "M"

"1100000000" "Yes" "F"

"1000000000" "Yes" "F"

"1000000000" "Yes" "M"

"1000000000" "Yes" "M"

"1000000000" "Yes" "M"

"1000000000" "Yes" "M"

"1000000000" "Yes" "M"

"1000000000" "Yes" "M"

"1000000000" "Yes" "M"

"1000000000" "Yes" "M"

"1000000000" "Yes" "M"

"1000000000" "Yes" "F"

"1000000000" "Yes" "F"

"1000000000" "Yes" "M"

"1000000000" "Yes" "M"

"1100000000" "Yes" "F"

"1000000000" "Yes" "F"

"1000000000" "Yes" "M"

"1000000000" "Yes" "M"

"1000000000" "Yes" "M"

"1000000000" "Yes" "F"

"1100000000" "Yes" "F"

"1000000000" "Yes" "F"

"1000000000" "Yes" "M"

"1000000000" "Yes" "M"

"1000000000" "Yes" "F"

"1000000000" "Yes" "F"

"1000000000" "Yes" "F"

"1000000000" "Yes" "M"

"1000000000" "Yes" "F"

"1000000000" "Yes" "M"

"1000000000" "Yes" "M"

"1000000000" "Yes" "M"

"1000000000" "Yes" "M"

"1000000000" "Yes" "M"

"1000000000" "Yes" "F"

"1000000000" "Yes" "M"

"1000000000" "Yes" "M"

"1000000000" "Yes" "F"

"1000000000" "Yes" "M"

"1000000000" "Yes" "F"

"1000000000" "Yes" "F"

"1000000000" "Yes" "F"

"1000000000" "Yes" "F"

"1000000000" "Yes" "F"

"1000000000" "Yes" "M"

"1000000000" "Yes" "F"

"1000000000" "Yes" "F"

"1000000000" "Yes" "M"

"1000000000" "Yes" "F"

"1000000000" "Yes" "M"

"1000000000" "Yes" "F"

"1000000000" "Yes" "F"

"1000000000" "Yes" "F"

"1000000000" "Yes" "M"

"1000000000" "Yes" "M"

"1000000000" "Yes" "M"

"1000000000" "Yes" "M"

"1000000000" "Yes" "F"

"1000000000" "Yes" "F"

"1000000000" "Yes" "F"

"1000000000" "Yes" "F"

"1000000000" "Yes" "F"

"1000000000" "Yes" "M"

"1000000000" "Yes" "M"

"1000000000" "Yes" "M"

"1000000000" "Yes" "M"

"1000000000" "Yes" "F"

"1000000000" "Yes" "M"

"1000000000" "Yes" "M"

"1000000000" "Yes" "M"

"1000000000" "Yes" "M"

"1000000000" "Yes" "M"

"1000000000" "Yes" "M"

"1000000000" "Yes" "M"

"1000000000" "Yes" "M"

"1000000000" "Yes" "M"

"1000000000" "Yes" "M"

"1000000000" "Yes" "M"

"1000000000" "Yes" "M"

"1000000000" "Yes" "M"

"1000000000" "Yes" "F"

"1000000000" "Yes" "F"

"1000000000" "Yes" "F"

"1000000000" "Yes" "F"

"1000000000" "Yes" "F"

"1000000000" "Yes" "F"

"1000000000" "Yes" "F"

"1000000000" "Yes" "F"

"1000000000" "Yes" "F"

"1000000000" "Yes" "F"

"1000000000" "Yes" "F"

"1000000000" "Yes" "F"

"1000000000" "Yes" "F"

"1000000000" "Yes" "F"

"1000000000" "Yes" "F"

"1000000000" "Yes" "F"

"1000000000" "Yes" "F"

"1000000000" "Yes" "F"

"1000000000" "Yes" "F"

"1000000000" "Yes" "F"

"1000000000" "Yes" "U"

"1000000000" "Yes" "F"

"1000000000" "Yes" "F"

"1000000000" "Yes" "F"

"1000000000" "Yes" "F"

"1000000000" "Yes" "F"

"1000000000" "Yes" "F"

"1000000000" "Yes" "F"

"1000000000" "Yes" "F"

"1000000000" "Yes" "F"

"1000000000" "Yes" "F"

"1100000000" "Yes" "F"

"1000000000" "Yes" "F"

"1000000000" "Yes" "F"

"1000000000" "Yes" "F"

"1000000000" "Yes" "F"

"1000000000" "Yes" "F"

"1000000000" "Yes" "F"

"1000000000" "Yes" "F"

"1000000000" "Yes" "F"

"1000000000" "Yes" "F"

"1000000000" "Yes" "F"

"1001000000" "Yes" "M"

"1000000000" "Yes" "M"

"1000000000" "Yes" "F"

"1000000000" "Yes" "M"

"1000000000" "Yes" "F"

"1000000000" "Yes" "M"

"1101000000" "Yes" "M"

"1000000000" "Yes" "M"

"1000000000" "Yes" "M"

"1000100000" "Yes" "M"

"1100000000" "Yes" "M"

"1000000000" "Yes" "M"

"1000000000" "Yes" "M"

"1000000000" "Yes" "M"

"1000000000" "Yes" "M"

"1100000000" "Yes" "M"

"1000000000" "Yes" "M"

"1000000000" "Yes" "M"

"1000000000" "Yes" "M"

"1000000000" "Yes" "M"

"1000000000" "Yes" "F"

"1000000000" "Yes" "M"

"1000000000" "Yes" "F"

"1000000000" "Yes" "M"

"1000000000" "Yes" "M"

"1000000000" "Yes" "F"

"1000000000" "Yes" "M"

"1000000000" "Yes" "F"

"1000000000" "Yes" "F"

"1000000000" "Yes" "M"

"1001000000" "Yes" "M"

"1000000000" "Yes" "M"

"1000000100" "Yes" "M"

"1000000000" "Yes" "M"

"1000000000" "Yes" "M"

"1000000000" "Yes" "M"

"1000000000" "Yes" "M"

"1000000000" "Yes" "M"

"1000000000" "Yes" "F"

"1000000000" "Yes" "M"

"1000000000" "Yes" "F"

"1000000000" "Yes" "F"

"1000000000" "Yes" "M"

"1000000000" "Yes" "F"

"1000000000" "Yes" "M"

"1000000000" "Yes" "F"

"1000000000" "Yes" "F"

"1000000000" "Yes" "M"

"1000000000" "Yes" "M"

"1000000000" "Yes" "M"

"1000000000" "Yes" "M"

"1000000000" "Yes" "M"

"1000000000" "Yes" "M"

"1000000000" "Yes" "M"

"1000000000" "Yes" "F"

"1010000000" "Yes" "M"

"1000000000" "Yes" "M"

"1000000000" "Yes" "F"

"1000000000" "Yes" "F"

"1000000000" "Yes" "F"

"1000000000" "Yes" "M"

"1000000000" "Yes" "M"

"1000100000" "Yes" "M"

"1000000000" "Yes" "M"

"1000000000" "Yes" "M"

"1000000000" "Yes" "F"

"1000000000" "Yes" "M"

"1000000000" "Yes" "M"

"1000000000" "Yes" "F"

"1000000000" "Yes" "M"

"1000000000" "Yes" "F"

"1000000000" "Yes" "F"

"1000000000" "Yes" "M"

"1000000000" "Yes" "F"

"1000000000" "Yes" "M"

"1000000000" "Yes" "M"

"1000000000" "Yes" "M"

"1000000000" "Yes" "F"

"1000000000" "Yes" "M"

"1000000000" "Yes" "M"

"1000000000" "Yes" "F"

"1000000000" "Yes" "M"

"1000000000" "Yes" "F"

"1000000000" "Yes" "F"

"1000000000" "Yes" "F"

"1000000000" "Yes" "M"

"1000000000" "Yes" "F"

"1000000100" "Yes" "M"

"1000000000" "Yes" "F"

"1000000000" "Yes" "F"

"1000000000" "Yes" "F"

"1000000000" "Yes" "M"

"1000000000" "Yes" "F"

"1000000000" "Yes" "F"

"1000000000" "Yes" "F"

"1000000000" "Yes" "M"

"1000000000" "Yes" "F"

"1000000000" "Yes" "M"

"1000000000" "Yes" "M"

"1000000000" "Yes" "M"

"1000000000" "Yes" "M"

"1000000000" "Yes" "F"

"1000000000" "Yes" "M"

"1000000000" "Yes" "M"

"1000000000" "Yes" "M"

"1000000000" "Yes" "F"

"1000000000" "Yes" "F"

"1000000000" "Yes" "F"

"1000000000" "Yes" "M"

"1000000000" "Yes" "M"

"1000000000" "Yes" "F"

"1000000000" "Yes" "M"

"1000000000" "Yes" "F"

"1000000000" "Yes" "M"

"1000000000" "Yes" "M"

"1000000000" "Yes" "M"

"1000000000" "Yes" "F"

"1000000000" "Yes" "M"

"1000000000" "Yes" "F"

"1000000000" "Yes" "F"

"1000000000" "Yes" "M"

"1000000000" "Yes" "M"

"1000000000" "Yes" "F"

"1000000000" "Yes" "M"

"1000000000" "Yes" "F"

"1000000000" "Yes" "M"

"1000000000" "Yes" "F"

"1000000000" "Yes" "M"

"1000000000" "Yes" "M"

"1000000000" "Yes" "F"

"1000000000" "Yes" "F"

"1000000000" "Yes" "M"

"1000000000" "Yes" "M"

"1000000000" "Yes" "M"

"1000000000" "Yes" "F"

"1000000000" "Yes" "M"

"1000000000" "Yes" "M"

"1000000000" "Yes" "M"

"1000000000" "Yes" "M"

"1000000000" "Yes" "M"

"1000000000" "Yes" "M"

"1000000000" "Yes" "F"

"1000000000" "Yes" "F"

"1000000000" "Yes" "M"

"1000000000" "Yes" "M"

"1000000000" "Yes" "F"

"1000000000" "Yes" "F"

"1000000000" "Yes" "M"

"1000000000" "Yes" "F"

"1000000000" "Yes" "F"

"1000000000" "Yes" "F"

"1000000000" "Yes" "M"

"1000000000" "Yes" "M"

"1000000000" "Yes" "F"

"1000000000" "Yes" "M"

"1000000000" "Yes" "F"

"1000000000" "Yes" "F"

"1000000000" "Yes" "F"

"1000000000" "Yes" "F"

"1000000000" "Yes" "M"

"1000000000" "Yes" "M"

"1000000000" "Yes" "M"

"1000000000" "Yes" "F"

"1000000000" "Yes" "F"

"1000000000" "Yes" "F"

"1000000000" "Yes" "F"

"1000000000" "Yes" "F"

"1000000000" "Yes" "M"

"1000000000" "Yes" "F"

"1000000000" "Yes" "F"

"1000000000" "Yes" "F"

"1000000000" "Yes" "F"

"1000000000" "Yes" "F"

"1000000000" "Yes" "F"

"1000000000" "Yes" "F"

"1000000000" "Yes" "M"

"1000000000" "Yes" "F"

"1000000000" "Yes" "M"

"1000000000" "Yes" "M"

"1000000000" "Yes" "F"

"1000000000" "Yes" "M"

"1000000000" "Yes" "M"

"1000000000" "Yes" "M"

"1000000000" "Yes" "F"

"1000000000" "Yes" "F"

"1000000000" "Yes" "F"

"1000000000" "Yes" "F"

"1000000000" "Yes" "F"

"1000000000" "Yes" "F"

"1000100000" "Yes" "M"

"1000000000" "Yes" "F"

"1000000000" "Yes" "M"

"1000000000" "Yes" "F"

"1000000000" "Yes" "F"

"1000000000" "Yes" "F"

"1000000000" "Yes" "M"

"1000000000" "Yes" "M"

"1000000000" "Yes" "M"

"1000000000" "Yes" "M"

"1000000000" "Yes" "M"

"1000000000" "Yes" "M"

"1000000000" "Yes" "F"

"1000000000" "Yes" "M"

"1000000101" "Yes" "M"

"1000000000" "Yes" "F"

"1000000000" "Yes" "F"

"1000000000" "Yes" "M"

"1000000000" "Yes" "M"

"1000000000" "Yes" "M"

"1000000000" "Yes" "M"

"1000000000" "Yes" "M"

"1000000000" "Yes" "F"

"1000000000" "Yes" "F"

"1000000000" "Yes" "M"

"1000000000" "Yes" "F"

"1000000000" "Yes" "F"

"1000000000" "Yes" "F"

"1000000000" "Yes" "M"

"1000000000" "Yes" "F"

"1000000000" "Yes" "F"

"1000000000" "Yes" "F"

"1000000000" "Yes" "M"

"1000000000" "Yes" "F"

"1000000000" "Yes" "M"

"1000000000" "Yes" "F"

"1000000000" "Yes" "F"

"1000000100" "Yes" "M"

"1000000000" "Yes" "M"

"1000000000" "Yes" "F"

"1000000000" "Yes" "M"

"1000000000" "Yes" "F"

"1000000000" "Yes" "F"

"1000000000" "Yes" "F"

"1000000000" "Yes" "M"

"1000000000" "Yes" "M"

"1000000000" "Yes" "M"

"1000000000" "Yes" "M"

"1000000000" "Yes" "M"

"1000000000" "Yes" "M"

"1000000000" "Yes" "F"

"1000000000" "Yes" "F"

"1000000000" "Yes" "F"

"1000000000" "Yes" "F"

"1000000000" "Yes" "M"

"1000000000" "Yes" "F"

"1000000000" "Yes" "M"

"1000000000" "Yes" "F"

"1000000000" "Yes" "F"

"1000000000" "Yes" "M"

"1000000000" "Yes" "M"

"1000000000" "Yes" "M"

"1000000000" "Yes" "M"

"1000000000" "Yes" "M"

"1000000000" "Yes" "F"

"1000000000" "Yes" "F"

"1000000000" "Yes" "M"

"1000000000" "Yes" "M"

"1000000000" "Yes" "M"

"1000000000" "Yes" "M"

"1000000000" "Yes" "M"

"1000000000" "Yes" "M"

"1000000000" "Yes" "M"

"1000000000" "Yes" "M"

"1000000000" "Yes" "F"

"1000000000" "Yes" "M"

"1000000000" "Yes" "M"

"1000000000" "Yes" "M"

"1000000000" "Yes" "M"

"1000000000" "Yes" "F"

"1000000000" "Yes" "M"

"1000000000" "Yes" "M"

"1000000000" "Yes" "F"

"1000000000" "Yes" "M"

"1000000000" "Yes" "M"

"1000000000" "Yes" "M"

"1000000000" "Yes" "M"

"1000000000" "Yes" "M"

"1000000000" "Yes" "M"

"1000000000" "Yes" "M"

"1000000000" "Yes" "F"

"1000000000" "Yes" "F"

"1000000000" "Yes" "F"

"1000000000" "Yes" "M"

"1000000000" "Yes" "M"

"1000000000" "Yes" "M"

"1000000000" "Yes" "M"

"1000000000" "Yes" "M"

"1000000000" "Yes" "M"

"1000000000" "Yes" "M"

"1000000000" "Yes" "F"

"1000000000" "Yes" "F"

"1000000000" "Yes" "F"

"1000000000" "Yes" "F"

"1000000000" "Yes" "F"

"1000000000" "Yes" "F"

"1000000000" "Yes" "M"

"1000000000" "Yes" "F"

"1000000000" "Yes" "F"

"1000000000" "Yes" "F"

"1000000000" "Yes" "F"

"1000000000" "Yes" "M"

"1000000000" "Yes" "M"

"1000000000" "Yes" "M"

"1000000000" "Yes" "F"

"1000000000" "Yes" "M"

"1000000000" "Yes" "M"

"1000000000" "Yes" "F"

"1000000001" "Yes" "F"

"1000000000" "Yes" "M"

"1000000000" "Yes" "M"

"1000000000" "Yes" "F"

"1000000000" "Yes" "M"

"1000000000" "Yes" "M"

"1000000000" "Yes" "M"

"1000000000" "Yes" "M"

"1000000000" "Yes" "M"

"1000000000" "Yes" "M"

"1000000000" "Yes" "M"

"1000000000" "Yes" "F"

"1000000000" "Yes" "F"

"1000000000" "Yes" "M"

"1000000000" "Yes" "M"

"1000000000" "Yes" "M"

"1000000000" "Yes" "M"

"1000000000" "Yes" "M"

"1000000000" "Yes" "F"

"1000000000" "Yes" "M"

"1000000000" "Yes" "M"

"1000000000" "Yes" "F"

"1000000000" "Yes" "M"

"1000000000" "Yes" "F"

"1000000000" "Yes" "F"

"1000000000" "Yes" "M"

"1000000000" "Yes" "M"

"1000000000" "Yes" "F"

"1000000000" "Yes" "M"

"1000000000" "Yes" "F"

"1000000000" "Yes" "M"

"1000000000" "Yes" "M"

"1000000000" "Yes" "M"

"1000000000" "Yes" "M"

"1000000000" "Yes" "F"

"1000000000" "Yes" "M"

"1000000000" "Yes" "M"

"1000000000" "Yes" "F"

"1000000000" "Yes" "M"

"1000000000" "Yes" "F"

"1000000000" "Yes" "F"

"1000000000" "Yes" "M"

"1000000000" "Yes" "F"

"1000000000" "Yes" "M"

"1000000000" "Yes" "F"

"1000000000" "Yes" "F"

"1000000000" "Yes" "F"

"1000000000" "Yes" "F"

"1000000000" "Yes" "F"

"1000000000" "Yes" "F"

"1000000000" "Yes" "F"

"1000000000" "Yes" "F"

"1000000000" "Yes" "F"

"1000000000" "Yes" "F"

"1000000000" "Yes" "F"

"1000000000" "Yes" "F"

"1000000000" "Yes" "F"

"1000000000" "Yes" "F"

"1000000000" "Yes" "F"

"1000000000" "Yes" "F"

"1000000000" "Yes" "F"

"1000000000" "Yes" "F"

"1000000000" "Yes" "F"

"1000000000" "Yes" "F"

"1000000000" "Yes" "F"

"1000000000" "Yes" "F"

"1000000000" "Yes" "F"

"1000000000" "Yes" "F"

"1000000000" "Yes" "F"

"1000000000" "Yes" "F"

"1000000000" "Yes" "M"

"1000000000" "Yes" "F"

"1000000000" "Yes" "F"

"1000000000" "Yes" "F"

"1000000000" "Yes" "F"

"1000000000" "Yes" "F"

"1000000000" "Yes" "F"

"1000000000" "Yes" "F"

"1000000000" "Yes" "F"

"1000000000" "Yes" "F"

"1000000000" "Yes" "M"

"1000000000" "Yes" "M"

"1000000000" "Yes" "F"

"1000000000" "Yes" "F"

"1000000000" "Yes" "M"

"1000000000" "Yes" "M"

"1000000000" "Yes" "F"

"1000000000" "Yes" "M"

"1000000000" "Yes" "F"

"1000000000" "Yes" "M"

"1000000000" "Yes" "F"

"1000000000" "Yes" "M"

"1000000000" "Yes" "F"

"1000000000" "Yes" "M"

"1000000000" "Yes" "M"

"1000000000" "Yes" "M"

"1000000000" "Yes" "F"

"1000000000" "Yes" "M"

"1000000000" "Yes" "M"

"1000000000" "Yes" "F"

"1000000000" "Yes" "F"

"1000000000" "Yes" "M"

"1000000000" "Yes" "M"

"1000000000" "Yes" "M"

"1000000000" "Yes" "F"

"1000000000" "Yes" "F"

"1000000000" "Yes" "M"

"1000000000" "Yes" "M"

"1000000000" "Yes" "F"

"1000000000" "Yes" "F"

"1000000000" "Yes" "M"

"1000000000" "Yes" "F"

"1000000000" "Yes" "M"

"1000000000" "Yes" "F"

"1000000000" "Yes" "M"

"1000000000" "Yes" "F"

"1000000000" "Yes" "F"

"1000000000" "Yes" "M"

"1000000000" "Yes" "M"

"1000000000" "Yes" "M"

"0100000000" "Yes" "M"

"0100000000" "Yes" "F"

"0100000000" "Yes" "M"

"0100000000" "Yes" "M"

"0100000000" "Yes" "M"

"0100000000" "Yes" "M"

"0100000000" "Yes" "M"

"0100000000" "Yes" "F"

"0100000000" "Yes" "F"

"0100000000" "Yes" "F"

"0100000000" "Yes" "M"

"0100000000" "Yes" "M"

"0100000000" "Yes" "M"

"0100000000" "Yes" "F"

"0100000000" "Yes" "F"

"0100000000" "Yes" "M"

"0100000000" "Yes" "F"

"0100000000" "Yes" "F"

"0100000001" "Yes" "F"

"0100000000" "Yes" "M"

"0100000000" "Yes" "M"

"0100000000" "Yes" "M"

"0100010000" "Yes" "F"

"0100000000" "Yes" "M"

"0100000000" "Yes" "F"

"0100000000" "Yes" "F"

"0100000000" "Yes" "M"

"0100000000" "Yes" "M"

"0100000000" "Yes" "F"

"0100000000" "Yes" "F"

"0100000000" "Yes" "M"

"0100000000" "Yes" "F"

"0100000000" "Yes" "M"

"0100000000" "Yes" "F"

"0100000000" "Yes" "F"

"0100000000" "Yes" "F"

"0100000000" "Yes" "M"

"0100000000" "Yes" "M"

"0100000000" "Yes" "M"

"0100000000" "Yes" "M"

"0100000000" "Yes" "M"

"0100010000" "Yes" "M"

"0100000000" "Yes" "M"

"0100000000" "Yes" "M"

"0100000000" "Yes" "M"

"0100000000" "Yes" "M"

"0100000000" "Yes" "F"

"0100000000" "Yes" "M"

"0111000000" "Yes" "M"

"0100000000" "Yes" "M"

"0100000000" "Yes" "M"

"0100000000" "Yes" "M"

"0100000000" "Yes" "F"

"0100000000" "Yes" "F"

"0100000000" "Yes" "F"

"0100000000" "Yes" "M"

"0100000000" "Yes" "F"

"0100000000" "Yes" "F"

"0100000000" "Yes" "F"

"0100000000" "Yes" "M"

"0100000000" "Yes" "M"

"0100000000" "Yes" "F"

"0100000000" "Yes" "F"

"0100000000" "Yes" "M"

"0100000000" "Yes" "F"

"0100000000" "Yes" "F"

"0100000000" "Yes" "F"

"0100000000" "Yes" "M"

"0100000000" "Yes" "F"

"0100000000" "Yes" "M"

"0101000000" "Yes" "F"

"0100000000" "Yes" "F"

"0100000000" "Yes" "M"

"0100000000" "Yes" "M"

"0100000000" "Yes" "F"

"0110000000" "Yes" "M"

"0100000000" "Yes" "F"

"0100000000" "Yes" "F"

"0100000000" "Yes" "M"

"0100000000" "Yes" "F"

"0100000000" "Yes" "F"

"0100000000" "Yes" "F"

"0100000000" "Yes" "F"

"0100000000" "Yes" "F"

"0100000000" "Yes" "F"

"0100000000" "Yes" "M"

"0100000000" "Yes" "M"

"0100000000" "Yes" "M"

"0100000000" "Yes" "M"

"0100000000" "Yes" "M"

"0100000000" "Yes" "M"

"0100000000" "Yes" "F"

"0100000000" "Yes" "F"

"0100000000" "Yes" "M"

"0100000000" "Yes" "M"

"0100000000" "Yes" "F"

"0100000000" "Yes" "M"

"0100000000" "Yes" "M"

"0100010000" "Yes" "M"

"0100000000" "Yes" "F"

"0100000000" "Yes" "F"

"0100000000" "Yes" "M"

"0100000000" "Yes" "F"

"0100000000" "Yes" "M"

"0100000000" "Yes" "M"

"0100000000" "Yes" "M"

"0100000000" "Yes" "F"

"0100000000" "Yes" "M"

"0100000000" "Yes" "M"

"0100000000" "Yes" "M"

"0100000000" "Yes" "M"

"0100000000" "Yes" "F"

"0100000000" "Yes" "M"

"0100000000" "Yes" "M"

"0100000000" "Yes" "M"

"0100000000" "Yes" "M"

"0100000000" "Yes" "F"

"0100000000" "Yes" "M"

"0100000000" "Yes" "M"

"0100000000" "Yes" "M"

"0100000000" "Yes" "M"

"0100000000" "Yes" "F"

"0100000000" "Yes" "M"

"0100000000" "Yes" "F"

"0100000000" "Yes" "M"

"0100000000" "Yes" "F"

"0110000000" "Yes" "M"

"0100000000" "Yes" "F"

"0100000000" "Yes" "M"

"0100000000" "Yes" "M"

"0100000000" "Yes" "M"

"0100000000" "Yes" "F"

"0100000000" "Yes" "F"

"0100000000" "Yes" "M"

"0100000000" "Yes" "M"

"0100000000" "Yes" "F"

"0100000000" "Yes" "M"

"0100000000" "Yes" "F"

"0100000000" "Yes" "F"

"0100001000" "Yes" "M"

"0100000000" "Yes" "M"

"0100000000" "Yes" "F"

"0100000000" "Yes" "F"

"0100000000" "Yes" "M"

"0100000000" "Yes" "F"

"0100000000" "Yes" "M"

"0100000000" "Yes" "M"

"0100000000" "Yes" "M"

"0100000000" "Yes" "F"

"0100000000" "Yes" "M"

"0100000000" "Yes" "M"

"0100100000" "Yes" "F"

"0100000000" "Yes" "F"

"0100000000" "Yes" "M"

"0100000000" "Yes" "M"

"0100000000" "Yes" "F"

"0100000000" "Yes" "M"

"0100000000" "Yes" "F"

"0100000000" "Yes" "F"

"0100000000" "Yes" "F"

"0100000000" "Yes" "M"

"0100000000" "Yes" "F"

"0100000000" "Yes" "M"

"0100000000" "Yes" "M"

"0100000000" "Yes" "M"

"0100000000" "Yes" "M"

"0100000000" "Yes" "M"

"0100000000" "Yes" "F"

"0100000000" "Yes" "M"

"0100000000" "Yes" "M"

"0100000000" "Yes" "M"

"0100000000" "Yes" "F"

"0100000000" "Yes" "M"

"0100000000" "Yes" "F"

"0101000000" "Yes" "M"

"0100000000" "Yes" "F"

"0100000000" "Yes" "F"

"0100000000" "Yes" "F"

"0100000000" "Yes" "F"

"0100000000" "Yes" "F"

"0100000000" "Yes" "F"

"0100000000" "Yes" "F"

"0100000000" "Yes" "F"

"0100000000" "Yes" "M"

"0100000000" "Yes" "F"

"0100000000" "Yes" "F"

"0100000000" "Yes" "F"

"0100000000" "Yes" "F"

"0100000000" "Yes" "F"

"0100000000" "Yes" "F"

"0100000000" "Yes" "F"

"0100000000" "Yes" "M"

"0100000000" "Yes" "F"

"0100000000" "Yes" "M"

"0100000000" "Yes" "F"

"0100000000" "Yes" "F"

"0100000000" "Yes" "F"

"0100000000" "Yes" "F"

"0100000000" "Yes" "F"

"0100000000" "Yes" "F"

"0100000000" "Yes" "F"

"0100000000" "Yes" "M"

"0100000000" "Yes" "M"

"0100000000" "Yes" "F"

"0100000000" "Yes" "F"

"0100000000" "Yes" "M"

"0100000000" "Yes" "F"

"0100000000" "Yes" "F"

"0100000000" "Yes" "F"

"0100000000" "Yes" "F"

"0100000000" "Yes" "M"

"0100000000" "Yes" "F"

"0100000000" "Yes" "M"

"0100000000" "Yes" "F"

"0110000000" "Yes" "F"

"0100000000" "Yes" "F"

"0100010000" "Yes" "M"

"0100000000" "Yes" "F"

"0101000000" "Yes" "M"

"0100000000" "Yes" "M"

"0100000000" "Yes" "M"

"0100000000" "Yes" "M"

"0100000000" "Yes" "M"

"0100000000" "Yes" "M"

"0100000000" "Yes" "M"

"0100000000" "Yes" "M"

"0100000000" "Yes" "M"

"0100000000" "Yes" "F"

"0100000000" "Yes" "F"

"0100000000" "Yes" "F"

"0100000000" "Yes" "F"

"0100000000" "Yes" "M"

"0100000000" "Yes" "M"

"0100000000" "Yes" "M"

"0100000000" "Yes" "M"

"0100000000" "Yes" "M"

"0100000000" "Yes" "M"

"0100000000" "Yes" "M"

"0100000000" "Yes" "F"

"0100000000" "Yes" "M"

"0100000000" "Yes" "M"

"0100000000" "Yes" "F"

"0100000000" "Yes" "M"

"0100000000" "Yes" "F"

"0100000000" "Yes" "M"

"0100000000" "Yes" "F"

"0100000000" "Yes" "M"

"0100000000" "Yes" "M"

"0100000000" "Yes" "M"

"0100000000" "Yes" "F"

"0100000000" "Yes" "F"

"0100000000" "Yes" "M"

"0100000000" "Yes" "F"

"0100000000" "Yes" "M"

"0100000000" "Yes" "F"

"0100000000" "Yes" "M"

"0100000000" "Yes" "F"

"0100000000" "Yes" "F"

"0100000000" "Yes" "M"

"0100000000" "Yes" "F"

"0100000000" "Yes" "M"

"0100000000" "Yes" "M"

"0100000000" "Yes" "M"

"0100000000" "Yes" "F"

"0100000000" "Yes" "M"

"0100000000" "Yes" "M"

"0100000000" "Yes" "M"

"0100000000" "Yes" "M"

"0100000000" "Yes" "M"

"0100000000" "Yes" "M"

"0100000000" "Yes" "M"

"0100000000" "Yes" "M"

"0100000000" "Yes" "F"

"0100000000" "Yes" "M"

"0100000000" "Yes" "M"

"0100000000" "Yes" "M"

"0100000000" "Yes" "F"

"0100000000" "Yes" "F"

"0100000000" "Yes" "F"

"0100000000" "Yes" "F"

"0100000000" "Yes" "F"

"0100000000" "Yes" "F"

"0100000000" "Yes" "F"

"0100000000" "Yes" "F"

"0100000000" "Yes" "F"

"0100000000" "Yes" "F"

"0100000000" "Yes" "F"

"0100000000" "Yes" "F"

"0100000000" "Yes" "F"

"0100000000" "Yes" "F"

"0100000000" "Yes" "F"

"0100000000" "Yes" "F"

"0100000000" "Yes" "F"

"0100000000" "Yes" "F"

"0100000000" "Yes" "F"

"0100000000" "Yes" "F"

"0100000000" "Yes" "F"

"0100000000" "Yes" "F"

"0100000000" "Yes" "F"

"0100000000" "Yes" "F"

"0100000000" "Yes" "F"

"0100000000" "Yes" "F"

"0100000000" "Yes" "F"

"0101000000" "Yes" "M"

"0100010000" "Yes" "M"

"0100000000" "Yes" "M"

"0100000000" "Yes" "M"

"0100000000" "Yes" "F"

"0100000000" "Yes" "M"

"0100000000" "Yes" "M"

"0100000000" "Yes" "M"

"0100000000" "Yes" "M"

"0100000000" "Yes" "M"

"0100000000" "Yes" "M"

"0100000000" "Yes" "M"

"0100000000" "Yes" "M"

"0100100000" "Yes" "M"

"0100000000" "Yes" "F"

"0100000000" "Yes" "F"

"0100000000" "Yes" "M"

"0100000000" "Yes" "M"

"0100000000" "Yes" "M"

"0100000000" "Yes" "F"

"0100000000" "Yes" "M"

"0100000000" "Yes" "M"

"0100000000" "Yes" "F"

"0100000000" "Yes" "F"

"0100000000" "Yes" "F"

"0100000000" "Yes" "F"

"0100000000" "Yes" "F"

"0100000000" "Yes" "F"

"0100000000" "Yes" "F"

"0100000000" "Yes" "F"

"0100000000" "Yes" "F"

"0100000000" "Yes" "M"

"0100000000" "Yes" "F"

"0100000000" "Yes" "F"

"0100000000" "Yes" "M"

"0100000000" "Yes" "M"

"0100000000" "Yes" "F"

"0100000000" "Yes" "F"

"0100000000" "Yes" "F"

"0110000000" "Yes" "F"

"0100000000" "Yes" "F"

"0100000000" "Yes" "F"

"0100000000" "Yes" "F"

"0100000000" "Yes" "F"

"0100000000" "Yes" "F"

"0100010000" "Yes" "F"

"0100000000" "Yes" "F"

"0100000000" "Yes" "F"

"0100000000" "Yes" "F"

"0100000000" "Yes" "F"

"0100000000" "Yes" "M"

"0100000000" "Yes" "F"

"0100000000" "Yes" "M"

"0100000000" "Yes" "F"

"0100000000" "Yes" "F"

"0100000000" "Yes" "F"

"0100000000" "Yes" "M"

"0100000000" "Yes" "F"

"0100000000" "Yes" "M"

"0100000000" "Yes" "M"

"0101000000" "Yes" "M"

"0100000000" "Yes" "M"

"0100000000" "Yes" "F"

"0100000000" "Yes" "F"

"0100000000" "Yes" "F"

"0100000000" "Yes" "M"

"0100000000" "Yes" "M"

"0100000000" "Yes" "F"

"0100000000" "Yes" "F"

"0100000000" "Yes" "F"

"0100000000" "Yes" "F"

"0100000000" "Yes" "M"

"0100000000" "Yes" "F"

"0100000000" "Yes" "M"

"0100000000" "Yes" "F"

"0100000000" "Yes" "F"

"0100000000" "Yes" "F"

"0100000000" "Yes" "F"

"0100000000" "Yes" "M"

"0100000000" "Yes" "M"

"0100000000" "Yes" "M"

"0100000000" "Yes" "M"

"0100000000" "Yes" "F"

"0100000000" "Yes" "M"

"0100000000" "Yes" "M"

"0100000000" "Yes" "F"

"0100000000" "Yes" "M"

"0100100000" "Yes" "F"

"0100000000" "Yes" "M"

"0100000000" "Yes" "F"

"0100000000" "Yes" "F"

"0100000000" "Yes" "M"

"0100000000" "Yes" "F"

"0100000000" "Yes" "M"

"0100000000" "Yes" "F"

"0100000000" "Yes" "F"

"0100000000" "Yes" "M"

"0100000000" "Yes" "M"

"0100000000" "Yes" "F"

"0100000000" "Yes" "M"

"0100000000" "Yes" "F"

"0100000000" "Yes" "F"

"0100000000" "Yes" "M"

"0100000000" "Yes" "F"

"0100000000" "Yes" "M"

"0100000000" "Yes" "M"

"0100000000" "Yes" "F"

"0100000000" "Yes" "F"

"0100000000" "Yes" "M"

"0100000000" "Yes" "M"

"0100000000" "Yes" "M"

"0100000000" "Yes" "F"

"0100000000" "Yes" "F"

"0100000000" "Yes" "F"

"0100000000" "Yes" "F"

"0100000000" "Yes" "F"

"0110000000" "Yes" "M"

"0100000000" "Yes" "F"

"0100000000" "Yes" "M"

"0100000000" "Yes" "M"

"0100000000" "Yes" "F"

"0100000000" "Yes" "F"

"0100000000" "Yes" "M"

"0100000000" "Yes" "F"

"0100000000" "Yes" "M"

"0100000000" "Yes" "F"

"0100000000" "Yes" "M"

"0100000000" "Yes" "F"

"0100000000" "Yes" "F"

"0100000000" "Yes" "M"

"0100000000" "Yes" "M"

"0100000000" "Yes" "M"

"0110000000" "Yes" "M"

"0100000000" "Yes" "F"

"0100000000" "Yes" "M"

"0100000000" "Yes" "F"

"0100000000" "Yes" "F"

"0100000000" "Yes" "F"

"0100000000" "Yes" "M"

"0100000000" "Yes" "F"

"0100000000" "Yes" "F"

"0100000000" "Yes" "M"

"0100000000" "Yes" "F"

"0100000000" "Yes" "F"

"0100000000" "Yes" "M"

"0100000000" "Yes" "F"

"0100000000" "Yes" "F"

"0100000000" "Yes" "F"

"0100000000" "Yes" "M"

"0100000000" "Yes" "F"

"0100000000" "Yes" "M"

"0100000000" "Yes" "F"

"0100000000" "Yes" "M"

"0100000000" "Yes" "F"

"0100000000" "Yes" "F"

"0100000000" "Yes" "M"

"0100000000" "Yes" "M"

"0110000000" "Yes" "M"

"0100000000" "Yes" "M"

"0100000000" "Yes" "M"

"0100000000" "Yes" "M"

"0100000000" "Yes" "M"

"0100000000" "Yes" "F"

"0100000000" "Yes" "M"

"0100000000" "Yes" "F"

"0100000000" "Yes" "F"

"0100000000" "Yes" "M"

"0100000000" "Yes" "M"

"0100000000" "Yes" "M"

"0100000000" "Yes" "F"

"0100010000" "Yes" "M"

"0100000000" "Yes" "F"

"0100000000" "Yes" "F"

"0100000000" "Yes" "M"

"0100000000" "Yes" "M"

"0101000000" "Yes" "F"

"0100000000" "Yes" "F"

"0100000000" "Yes" "F"

"0100000000" "Yes" "F"

"0100000000" "Yes" "F"

"0100000000" "Yes" "M"

"0100000000" "Yes" "F"

"0100000000" "Yes" "M"

"0100100000" "Yes" "M"

"0100000000" "Yes" "M"

"0100000000" "Yes" "F"

"0100000000" "Yes" "M"

"0100000000" "Yes" "M"

"0100000000" "Yes" "F"

"0110000000" "Yes" "M"

"0100000000" "Yes" "F"

"0100000000" "Yes" "F"

"0100000000" "Yes" "M"

"0100000000" "Yes" "F"

"0100000000" "Yes" "M"

"0100000000" "Yes" "M"

"0100000000" "Yes" "M"

"0100000000" "Yes" "F"

"0100000000" "Yes" "M"

"0100000000" "Yes" "F"

"0100000000" "Yes" "M"

"0100000000" "Yes" "M"

"0100000000" "Yes" "M"

"0100000000" "Yes" "M"

"0100000000" "Yes" "F"

"0100000000" "Yes" "M"

"0100000000" "Yes" "F"

"0100000000" "Yes" "F"

"0100000000" "Yes" "M"

"0100000000" "Yes" "M"

"0100000000" "Yes" "F"

"0100000000" "Yes" "M"

"0100000000" "Yes" "F"

"0100000000" "Yes" "M"

"0100000000" "Yes" "F"

"0100000000" "Yes" "F"

"0100000000" "Yes" "F"

"0100000000" "Yes" "F"

"0100000000" "Yes" "F"

"0100000000" "Yes" "F"

"0100100000" "Yes" "M"

"0100000000" "Yes" "F"

"0100000000" "Yes" "M"

"0100000000" "Yes" "M"

"0100100000" "Yes" "F"

"0100000000" "Yes" "F"

"0100100000" "Yes" "F"

"0100000000" "Yes" "F"

"0100000000" "Yes" "F"

"0100000000" "Yes" "M"

"0100000000" "Yes" "M"

"0100000000" "Yes" "M"

"0100000000" "Yes" "F"

"0100000000" "Yes" "M"

"0100000000" "Yes" "M"

"0100000000" "Yes" "F"

"0100000000" "Yes" "F"

"0100000000" "Yes" "F"

"0100100000" "Yes" "F"

"0100000000" "Yes" "F"

"0100000000" "Yes" "F"

"0100000000" "Yes" "F"

"0100000000" "Yes" "M"

"0100100000" "Yes" "M"

"0100000000" "Yes" "M"

"0100000000" "Yes" "F"

"0100000000" "Yes" "F"

"0100000000" "Yes" "M"

"0101000000" "Yes" "M"

"0100000000" "Yes" "F"

"0100000000" "Yes" "M"

"0100000000" "Yes" "M"

"0100000000" "Yes" "F"

"0100000000" "Yes" "M"

"0110000000" "Yes" "M"

"0100000000" "Yes" "F"

"0100000000" "Yes" "F"

"0100000000" "Yes" "F"

"0100000000" "Yes" "M"

"0100000000" "Yes" "M"

"0100000000" "Yes" "F"

"0100000000" "Yes" "F"

"0100000000" "Yes" "M"

"0100000000" "Yes" "M"

"0100000000" "Yes" "M"

"0100000000" "Yes" "F"

"0100000000" "Yes" "F"

"0100100000" "Yes" "F"

"0100000000" "Yes" "M"

"0111000000" "Yes" "M"

"0100000000" "Yes" "M"

"0100000000" "Yes" "F"

"0100000000" "Yes" "F"

"0100000000" "Yes" "F"

"0100000000" "Yes" "M"

"0100000000" "Yes" "M"

"0100000000" "Yes" "M"

"0100000000" "Yes" "F"

"0100010000" "Yes" "F"

"0100000000" "Yes" "F"

"0100000000" "Yes" "M"

"0100000000" "Yes" "M"

"0100000000" "Yes" "M"

"0100000000" "Yes" "F"

"0100000000" "Yes" "F"

"0100000000" "Yes" "F"

"0100000000" "Yes" "M"

"0100000000" "Yes" "M"

"0100000000" "Yes" "M"

"0100000000" "Yes" "F"

"0100000000" "Yes" "F"

"0100000000" "Yes" "F"

"0100000000" "Yes" "M"

"0101000000" "Yes" "M"

"0100000000" "Yes" "M"

"0100000000" "Yes" "F"

"0100000000" "Yes" "F"

"0100000000" "Yes" "F"

"0100000000" "Yes" "M"

"0100000110" "Yes" "M"

"0100000000" "Yes" "M"

"0100000000" "Yes" "F"

"0100000000" "Yes" "F"

"0100000000" "Yes" "F"

"0100000000" "Yes" "M"

"0100001000" "Yes" "M"

"0100000000" "Yes" "M"

"0100000000" "Yes" "F"

"0100000000" "Yes" "F"

"0100000000" "Yes" "F"

"0100000000" "Yes" "M"

"0100000000" "Yes" "M"

"0100000000" "Yes" "M"

"0100000000" "Yes" "F"

"0100000000" "Yes" "F"

"0100000000" "Yes" "F"

"0100000000" "Yes" "M"

"0100000000" "Yes" "M"

"0100000000" "Yes" "M"

"0100000000" "Yes" "F"

"0100000000" "Yes" "F"

"0100000100" "Yes" "F"

"0100000000" "Yes" "M"

"0100000000" "Yes" "M"

"0100000000" "Yes" "M"

"0100000000" "Yes" "F"

"0100000000" "Yes" "F"

"0100000000" "Yes" "F"

"0100001000" "Yes" "M"

"0100000000" "Yes" "M"

"0100000000" "Yes" "F"

"0100000000" "Yes" "F"

"0100000000" "Yes" "F"

"0100000000" "Yes" "F"

"0100000000" "Yes" "F"

"0100000000" "Yes" "F"

"0100000000" "Yes" "F"

"0100000000" "Yes" "F"

"0100000000" "Yes" "M"

"0100000000" "Yes" "M"

"0100000000" "Yes" "M"

"0100000000" "Yes" "F"

"0100100000" "Yes" "M"

"0100000000" "Yes" "F"

"0100000000" "Yes" "F"

"0100000000" "Yes" "F"

"0100000000" "Yes" "F"

"0100000000" "Yes" "F"

"0100000000" "Yes" "F"

"0100000000" "Yes" "F"

"0100000000" "Yes" "F"

"0100000000" "Yes" "F"

"0100000000" "Yes" "F"

"0100000000" "Yes" "F"

"0100000000" "Yes" "F"

"0100000000" "Yes" "F"

"0100000000" "Yes" "F"

"0100000000" "Yes" "F"

"0100000000" "Yes" "F"

"0100000000" "Yes" "F"

"0100000000" "Yes" "F"

"0100000000" "Yes" "F"

"0100000010" "Yes" "F"

"0100000000" "Yes" "F"

"0110000000" "Yes" "F"

"0100000000" "Yes" "F"

"0100000000" "Yes" "F"

"0100000000" "Yes" "F"

"0100000000" "Yes" "F"

"0100100000" "Yes" "F"

"0100000000" "Yes" "F"

"0100000000" "Yes" "F"

"0100000000" "Yes" "F"

"0100000010" "Yes" "F"

"0100000000" "Yes" "F"

"0100000000" "Yes" "F"

"0100000000" "Yes" "F"

"0100100000" "Yes" "F"

"0100000000" "Yes" "F"

"0100000000" "Yes" "F"

"0100000000" "Yes" "F"

"0100000000" "Yes" "F"

"0100000000" "Yes" "F"

"0100000000" "Yes" "F"

"0100000000" "Yes" "F"

"0100100000" "Yes" "F"

"0100000000" "Yes" "F"

"0100000000" "Yes" "F"

"0100000000" "Yes" "F"

"0100100000" "Yes" "F"

"0100000000" "Yes" "F"

"0100000000" "Yes" "F"

"0100000000" "Yes" "F"

"0100000000" "Yes" "F"

"0100000000" "Yes" "F"

"0100000000" "Yes" "F"

"0100000000" "Yes" "F"

"0100000000" "Yes" "F"

"0100000000" "Yes" "F"

"0100000000" "Yes" "F"

"0100000000" "Yes" "F"

"0100000000" "Yes" "F"

"0100000000" "Yes" "F"

"0100000000" "Yes" "F"

"0100000000" "Yes" "F"

"0100000000" "Yes" "F"

"0100000000" "Yes" "F"

"0100001000" "Yes" "F"

"0100000000" "Yes" "F"

"0100000000" "Yes" "F"

"0100000000" "Yes" "F"

"0100000000" "Yes" "F"

"0100000000" "Yes" "F"

"0100000000" "Yes" "F"

"0100000000" "Yes" "F"

"0100000000" "Yes" "F"

"0100000000" "Yes" "F"

"0110000000" "Yes" "F"

"0100000000" "Yes" "F"

"0100000000" "Yes" "F"

"0100000000" "Yes" "F"

"0101000000" "Yes" "F"

"0100000000" "Yes" "F"

"0100000000" "Yes" "F"

"0100000000" "Yes" "F"

"0100000000" "Yes" "F"

"0100000000" "Yes" "M"

"0100000000" "Yes" "F"

"0110000000" "Yes" "M"

"0100000000" "Yes" "M"

"0100000000" "Yes" "M"

"0100000000" "Yes" "M"

"0100000000" "Yes" "M"

"0100000000" "Yes" "M"

"0100000000" "Yes" "M"

"0100000000" "Yes" "M"

"0100000000" "Yes" "M"

"0100000000" "Yes" "M"

"0100000000" "Yes" "M"

"0100000000" "Yes" "M"

"0100000000" "Yes" "M"

"0100000000" "Yes" "M"

"0100000000" "Yes" "M"

"0100000000" "Yes" "M"

"0100000000" "Yes" "M"

"0100000000" "Yes" "M"

"0100000000" "Yes" "M"

"0100000000" "Yes" "M"

"0100000000" "Yes" "M"

"0100000000" "Yes" "M"

"0100000000" "Yes" "M"

"0100000000" "Yes" "M"

"0100000000" "Yes" "M"

"0100000000" "Yes" "M"

"0100000000" "Yes" "M"

"0100000000" "Yes" "M"

"0100100000" "Yes" "M"

"0100000000" "Yes" "M"

"0100000000" "Yes" "M"

"0100000000" "Yes" "M"

"0100000000" "Yes" "M"

"0100000000" "Yes" "M"

"0100000000" "Yes" "M"

"0100000000" "Yes" "M"

"0100000000" "Yes" "M"

"0100000000" "Yes" "M"

"0100000000" "Yes" "M"

"0100000000" "Yes" "M"

"0100000000" "Yes" "M"

"0100000000" "Yes" "M"

"0100010000" "Yes" "M"

"0100000100" "Yes" "M"

"0100000000" "Yes" "M"

"0100000000" "Yes" "M"

"0100000000" "Yes" "M"

"0100000000" "Yes" "M"

"0100000000" "Yes" "M"

"0100000000" "Yes" "M"

"0110000000" "Yes" "M"

"0100000000" "Yes" "M"

"0100000000" "Yes" "M"

"0100000000" "Yes" "M"

"0100000000" "Yes" "M"

"0100000000" "Yes" "M"

"0100000000" "Yes" "M"

"0100000000" "Yes" "M"

"0100000000" "Yes" "M"

"0100000000" "Yes" "M"

"0100000000" "Yes" "M"

"0100000000" "Yes" "M"

"0100000000" "Yes" "M"

"0100000000" "Yes" "M"

"0100000000" "Yes" "M"

"0100000000" "Yes" "M"

"0100000000" "Yes" "M"

"0100100000" "Yes" "M"

"0100000000" "Yes" "M"

"0100000000" "Yes" "M"

"0100000000" "Yes" "M"

"0100000000" "Yes" "M"

"0100000000" "Yes" "M"

"0100000000" "Yes" "M"

"0100000000" "Yes" "M"

"0100000000" "Yes" "M"

"0100100000" "Yes" "M"

"0100000000" "Yes" "M"

"0100000001" "Yes" "M"

"0100000000" "Yes" "M"

"0100100000" "Yes" "M"

"0100000000" "Yes" "M"

"0100000000" "Yes" "M"

"0100000000" "Yes" "M"

"0100000000" "Yes" "M"

"0100000000" "Yes" "M"

"0100000000" "Yes" "M"

"0100000000" "Yes" "M"

"0100000000" "Yes" "M"

"0100000000" "Yes" "M"

"0100000000" "Yes" "M"

"0100100000" "Yes" "M"

"0100000000" "Yes" "M"

"0100000000" "Yes" "M"

"0100000000" "Yes" "M"

"0100000000" "Yes" "M"

"0100000000" "Yes" "M"

"0100100000" "Yes" "M"

"0100000000" "Yes" "M"

"0100000000" "Yes" "M"

"0100000000" "Yes" "M"

"0100000000" "Yes" "M"

"0100000000" "Yes" "M"

"0100000000" "Yes" "M"

"0100000000" "Yes" "M"

"0100000000" "Yes" "M"

"0100000000" "Yes" "M"

"0100000000" "Yes" "M"

"0100000000" "Yes" "M"

"0100000000" "Yes" "M"

"0100000000" "Yes" "M"

"0100000000" "Yes" "M"

"0100000000" "Yes" "M"

"0100000000" "Yes" "M"

"0100000000" "Yes" "M"

"0100000000" "Yes" "M"

"0100000000" "Yes" "M"

"0100000000" "Yes" "M"

"0100000000" "Yes" "M"

"0100000000" "Yes" "M"

"0100000000" "Yes" "M"

"0100000000" "Yes" "M"

"0100000000" "Yes" "M"

"0100000000" "Yes" "M"

"0100000000" "Yes" "M"

"0100000000" "Yes" "M"

"0100000000" "Yes" "M"

"0100000000" "Yes" "M"

"0100000000" "Yes" "M"

"0100000000" "Yes" "M"

"0100000000" "Yes" "M"

"0110000000" "Yes" "M"

"0100000000" "Yes" "F"

"0100000000" "Yes" "F"

"0100000000" "Yes" "F"

"0100000000" "Yes" "F"

"0100000000" "Yes" "F"

"0100001000" "Yes" "F"

"0101010000" "Yes" "F"

"0100100000" "Yes" "F"

"0100000000" "Yes" "F"

"0100000000" "Yes" "F"

"0100000000" "Yes" "F"

"0100000000" "Yes" "F"

"0100000000" "Yes" "F"

"0100000000" "Yes" "F"

"0100000000" "Yes" "F"

"0100000000" "Yes" "F"

"0100000000" "Yes" "F"

"0100000000" "Yes" "F"

"0100000000" "Yes" "F"

"0100000000" "Yes" "F"

"0100000000" "Yes" "F"

"0100000000" "Yes" "F"

"0100000000" "Yes" "F"

"0100000000" "Yes" "F"

"0100000000" "Yes" "F"

"0100000000" "Yes" "F"

"0100000000" "Yes" "F"

"0100000000" "Yes" "F"

"0100000000" "Yes" "F"

"0100000000" "Yes" "F"

"0100000000" "Yes" "F"

"0100000000" "Yes" "F"

"0100000000" "Yes" "F"

"0100000000" "Yes" "F"

"0100000000" "Yes" "F"

"0100000000" "Yes" "F"

"0100000000" "Yes" "F"

"0100000000" "Yes" "F"

"0100000000" "Yes" "F"

"0100000000" "Yes" "F"

"0100000000" "Yes" "F"

"0100000000" "Yes" "F"

"0100000000" "Yes" "F"

"0110000000" "Yes" "F"

"0100000000" "Yes" "F"

"0100000000" "Yes" "F"

"0110000000" "Yes" "F"

"0100000000" "Yes" "F"

"0100000000" "Yes" "F"
[truncated: 1,133,189 more chars]
